# Supplementary material for: A Network Pharmacology and Molecular-Docking-Based Approach to Identify the Probable Targets of Short-Chain Fatty-Acid-Producing Microbial Metabolites against Kidney Cancer and Inflammation
Source: MDPI journal article supplement (doi:10.3390/biom13111678), 2023-11-20
Supplement: s1 [file s1]

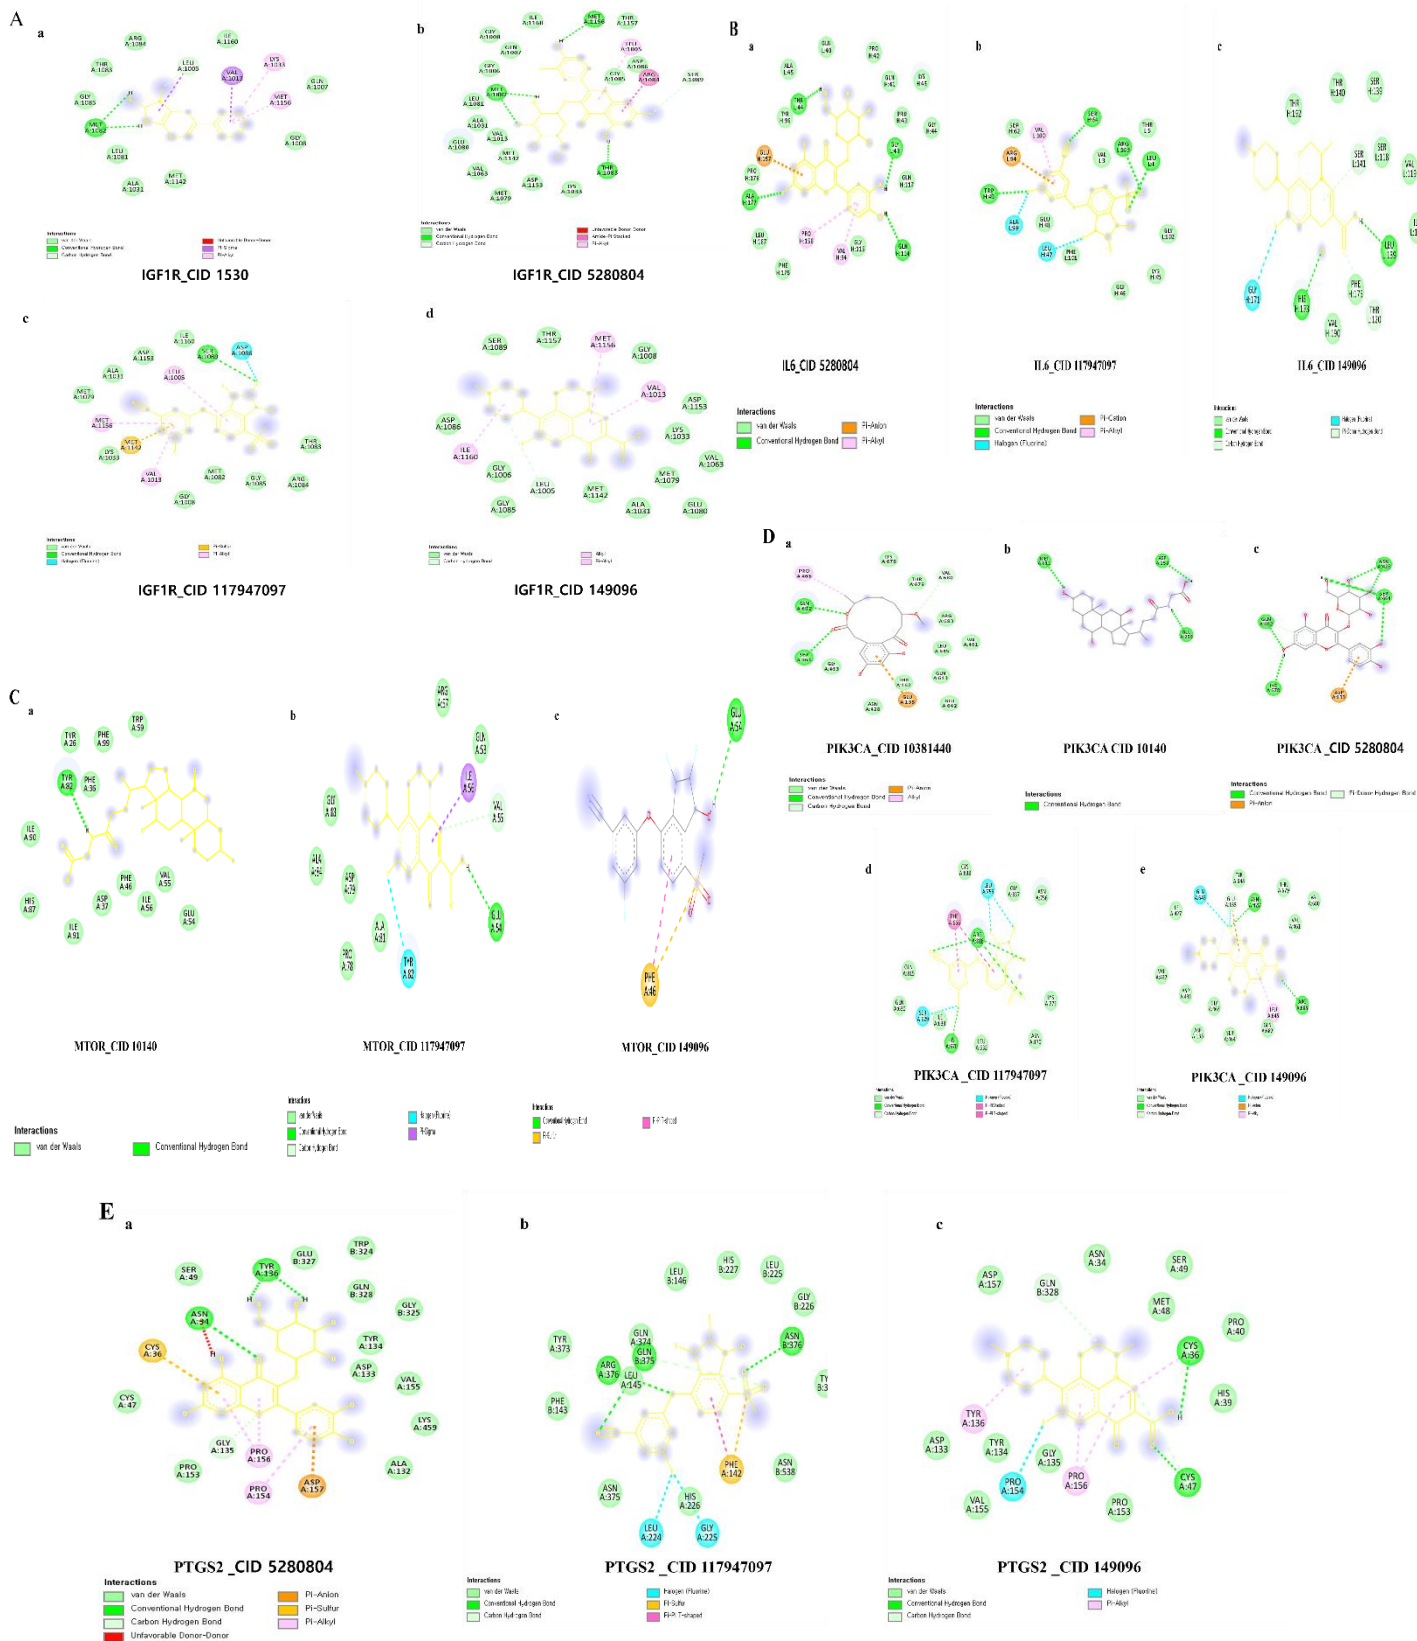

Supplementary Figure 1. Molecular docking analysis of selected compounds and targets. Showing different bond attraction between compounds and targets.
