# Supplementary material for: A Network Pharmacology and Molecular-Docking-Based Approach to Identify the Probable Targets of Short-Chain Fatty-Acid-Producing Microbial Metabolites against Kidney Cancer and Inflammation
Source: MDPI journal article supplement (doi:10.3390/biom13111678), 2023-11-20
Supplement: s1 [file s1]

# GeneMANIA report

Created on : 21 July 2023 12:45:43  
Last database update : 13 August 2021 00:00:00  
Application version : 3.6.0

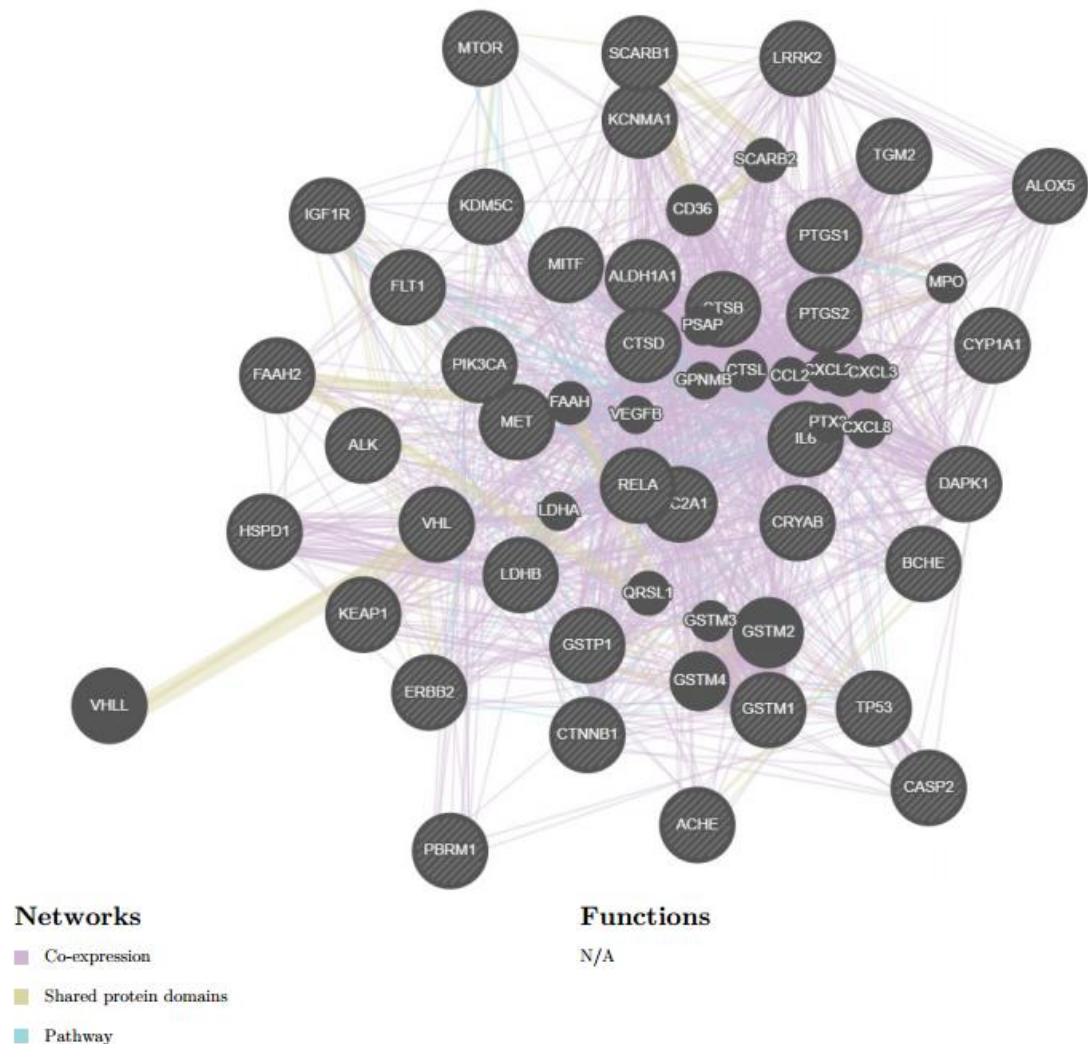

## Search parameters

**Organism** Homo sapiens (human)  
**Genes** ALOX5, SCARB1, PTGS2, KEAP1, GSTP1, ACHE, PTGS1, FLT1, MET, CASP2, CRYAB, LDHB, BCHE, SLC2A1, CTSD, PIK3CA, KDM5C, VHL, GSTM1, IL6, IGF1R, CYP1A1, TP53, ERBB2, HSPD1, KCNMA1, PBRM1, CTSB, ALDH1A1, FAAH2, CTNNB1, ALK, RELA, MITF, LRRK2, DAPK1, MTOR, TGM2  
**Network**  
**weighting** Automatically selected weighting method
