# Supplementary material for: A Network Pharmacology and Molecular-Docking-Based Approach to Identify the Probable Targets of Short-Chain Fatty-Acid-Producing Microbial Metabolites against Kidney Cancer and Inflammation
Source: Biomolecules. 2023 Nov 20;13(11):1678. doi: 10.3390/biom13111678 (PMC10669250; doi:10.3390/biom13111678)
Supplement: Supplementary file 1 [file biomolecules-13-01678-s001.zip]

Archive with 8 entries (8 files):
- supplementary/Supplementary Figure S1.pdf
- supplementary/Supplementary S1. SCFAs microbe's database (compounds and targets).xlsx
- supplementary/Supplementary S2. Kidney cancer and inflammation database (diseases targets).xlsx
- supplementary/Supplementary S3. GeneMANIA analysis result (suitable target genes).pdf
- supplementary/Supplementary S4. Molecular docking simulation results (between all selected compounds and targets).xlsx
- supplementary/Supplementary S5. GO and KEGG pathway analysis.xlsx
- supplementary/Supplementary S6. PPI network analysis. Top 20 targets selection..xlsx
- supplementary/Supplementary S7. ADME properties of selected compounds.xlsx
