# Supplementary material for: A Network Pharmacology and Molecular-Docking-Based Approach to Identify the Probable Targets of Short-Chain Fatty-Acid-Producing Microbial Metabolites against Kidney Cancer and Inflammation
Source: Biomolecules. 2023 Nov 20;13(11):1678. doi: 10.3390/biom13111678 (PMC10669250; doi:10.3390/biom13111678)
Supplement: Supplementary file 1 [file biomolecules-13-01678-s001.zip › supplementary/Supplementary S1. SCFAs microbe's database (compounds and targets).xlsx]

## Sheet: all microbes
Human / Mouse	Gut Microbiota (ID)	Substrate (ID)	Metabolite (ID)	Gene (ID)	Alteration	Throughput	PMID	Network	Details
human	Bacillus sp.46 (1266601, gm1018)		Platycodin D (162859, CHEBI:70436)				27222071	network	details
human	Bacillus sp. 52 (gm1070)	Rutin (5280805, HMDB0003249, CHEBI:28527)	Isoquercitrin (5280804, HMDB0037362, CHEBI:68352)				22583754	network	details
human	Bacillus sp. 52 (gm1070)	Rutin (5280805, HMDB0003249, CHEBI:28527)	Leucocianidol (71629, CHEBI:15758)				22583754	network	details
human	Bacillus sp. 46 (1266601, gm1132)	Avicularin (5490064, HMDB0030860, CHEBI:65460)	Quercetin (5280343, HMDB0005794, CHEBI:16243)				24463398	network	details
human	Bacillus sp. 46 (1266601, gm1132)	Quercetin (5280343, HMDB0005794, CHEBI:16243)	Quercitrin (5280459, HMDB0033751, CHEBI:17558)				24463398	network	details
human	Bacillus sp. 46 (1266601, gm1132)	Quercetin (5280343, HMDB0005794, CHEBI:16243)	Isoquercitrin (5280804, HMDB0037362, CHEBI:68352)				24463398	network	details
human	Bacillus sp. 46 (1266601, gm1132)	Quercetin (5280343, HMDB0005794, CHEBI:16243)	Quercimeritrin (5282160, CHEBI:28529)				24463398	network	details
human	Bacillus sp. 46 (1266601, gm1132)	Avicularin (5490064, HMDB0030860, CHEBI:65460)	11-Methoxycurvularin (10381440)				24463398	network	details
human	Bacteroides (816, gm0077)	Arbutin (440936, HMDB0029943, CHEBI:18305)	Hydroquinone (785, HMDB0002434, CHEBI:17594)	BCL2 (596)	Reduced	low-throughput	21889493	network	details
human	Bacteroides (816, gm0077)	Arbutin (440936, HMDB0029943, CHEBI:18305)	Hydroquinone (785, HMDB0002434, CHEBI:17594)	BAX (581)	Elevated	low-throughput	21889493	network	details
human	Bacteroides (816, gm0077)	Arbutin (440936, HMDB0029943, CHEBI:18305)	Hydroquinone (785, HMDB0002434, CHEBI:17594)	CASP3 (836)	Elevated	low-throughput	21889493	network	details
human	Bacteroides (816, gm0077)	Phosphoenolpyruvate (1005, HMDB0000263, CHEBI:44897)	Oxalacetic acid (970, HMDB0000223, CHEBI:30744)				22018234	network	details
human	Bacteroides (816, gm0077)	Fumarate (5460307, CHEBI:29806)	Succinate (160419, CHEBI:30031)				22018234	network	details
human	Bacteroides (816, gm0077)	Succinate (160419, CHEBI:30031)	Propionate (104745, CHEBI:17272)				22018234	network	details
human	Bacteroides caccae (47678, gm0079)		Tartaric acid (875, HMDB0062642, CHEBI:15674)				31235863	network	details
human	Bacteroides caccae (47678, gm0079)		4-Pyridoxic acid (6723, HMDB0000017, CHEBI:17405)				31235863	network	details
human	Bacteroides caccae (47678, gm0079)		Ethyl phenyllactate, (-)- (9877619, HMDB0032618)				29572891	network	details
human	Bacteroides caccae (47678, gm0079)		(R)-3-(4-Hydroxyphenyl)lactate (9548632, CHEBI:10980)				29572891	network	details
human	Bacteroides distasonis (823, gm0818)		Succinate (160419, CHEBI:30031)				30605678	network	details
human	Bacteroides distasonis (823, gm0818)		Bile acid (439520, CHEBI:22868)				30605678	network	details
human	Bacteroides distasonis (823, gm0818)			NFKB1 (4790)	Reduced	low-throughput	17485456	network	details
human	Bacteroides distasonis (823, gm0818)			CXCL8 (3576)	Reduced	low-throughput	17485456	network	details
human	Bacteroides fragilis (817, gm0082)		Glycocholic acid (10140, HMDB0000138, CHEBI:17687)				31235863	network	details
human	Bacteroides fragilis (817, gm0082)		3-Phenylpropionic acid (107, HMDB0000764, CHEBI:28631)				31235863	network	details
human	Bacteroides fragilis (817, gm0082)			FFAR2 (2867)	Elevated	low-throughput	23828891	network	details
human	Bacteroides fragilis (817, gm0082)			FOXP3 (50943)	Elevated	low-throughput	23828891	network	details
human	Bacteroides fragilis (817, gm0082)			IL10 (3586)	Elevated	low-throughput	23828891	network	details
human	Bacteroides fragilis (817, gm0082)	Geniposide (107848, CHEBI:5299)	Genipin (442424, HMDB0035830, CHEBI:5298)				22553067	network	details
human	Bacteroides fragilis ATCC 23745 (gm1123)			TLR2 (7097)	Reduced	low-throughput	30507089	network	details
human	Bacteroides fragilis ATCC 23745 (gm1123)			TLR4 (7099)	Elevated	low-throughput	30507089	network	details
human	Bacteroides fragilis ATCC 23745 (gm1123)			IFNG (3458)	Elevated	low-throughput	30507089	network	details
human	Bacteroides fragilis ATCC 23745 (gm1123)			IL4 (3565)	Elevated	low-throughput	30507089	network	details
human	Bacteroides fragilis ATCC 23745 (gm1123)			IL10 (3586)	Elevated	low-throughput	30507089	network	details
human	Bacteroides fragilis (817, gm0082)	Daidzein (5281708, HMDB0003312, CHEBI:28197)	Equol (91469, HMDB0002209, CHEBI:428126)				32218321	network	details
human	Bacteroides fragilis SDG-Mt85-5B (817, gm1170)	Secoisolariciresinol diglucoside (9917980, HMDB0036323)	Secoisolariciresinol (65373, HMDB0013692, CHEBI:65004)				16765860	network	details
human	Bacteroides fragilis SDG-Mt85-4C (817, gm1171)	Secoisolariciresinol diglucoside (9917980, HMDB0036323)	Secoisolariciresinol (65373, HMDB0013692, CHEBI:65004)				16765860	network	details
human	Bacteroides fragilis DIfE-05 (817, gm1172)	Secoisolariciresinol diglucoside (9917980, HMDB0036323)	Secoisolariciresinol (65373, HMDB0013692, CHEBI:65004)				16765860	network	details
human	Bacteroides ovatus (28116, gm0084)	Daidzein (5281708, HMDB0003312, CHEBI:28197)	Equol (91469, HMDB0002209, CHEBI:428126)				32218321	network	details
human	Bacteroides ovatus SDG-Mt85-3C (28116, gm1174)	Secoisolariciresinol diglucoside (9917980, HMDB0036323)	Secoisolariciresinol (65373, HMDB0013692, CHEBI:65004)				16765860	network	details
human	Bacteroides ovatus (28116, gm0084)	Rutin (5280805, HMDB0003249, CHEBI:28527)	Quercetin (5280343, HMDB0005794, CHEBI:16243)				19580283	network	details
human	Bacteroides ovatus (28116, gm0084)	Daidzein (5281708, HMDB0003312, CHEBI:28197)	Equol (91469, HMDB0002209, CHEBI:428126)				19580283	network	details
human	Bacteroides sp. 45 (gm1056)	Quercitrin (5280459, HMDB0033751, CHEBI:17558)	Hydroxyquercitrin (129887767)				23754166	network	details
human	Bacteroides sp. 45 (gm1056)	Quercitrin (5280459, HMDB0033751, CHEBI:17558)	Quercetin (5280343, HMDB0005794, CHEBI:16243)				23754166	network	details
human	Bacteroides sp. 45 (gm1056)	Quercitrin (5280459, HMDB0033751, CHEBI:17558)	3,4-Dihydroxybenzoic acid (72, CHEBI:36062)				23754166	network	details
human	Bacteroides sp. MANG (298389, gm1069)	Mangiferin (5281647, HMDB0034410, CHEBI:6682)	Aglycone (CHEBI:166892)				16141538	network	details
human	Bacteroides sp. MANG (298389, gm1069)	Mangiferin (5281647, HMDB0034410, CHEBI:6682)	Norathyriol (5281656, CHEBI:7622)				16141538	network	details
human	Bacteroides sp. 45 (gm1056)	Rutin (5280805, HMDB0003249, CHEBI:28527)	Isoquercitrin (5280804, HMDB0037362, CHEBI:68352)				22583754	network	details
human	Bacteroides sp. 45 (gm1056)	Rutin (5280805, HMDB0003249, CHEBI:28527)	Leucocianidol (71629, CHEBI:15758)				22583754	network	details
human	Bacteroides sp. 42 (gm1071)	Rutin (5280805, HMDB0003249, CHEBI:28527)	Leucocianidol (71629, CHEBI:15758)				22583754	network	details
human	Bacteroides sp. 22 (gm1072)	Rutin (5280805, HMDB0003249, CHEBI:28527)	Isoquercitrin (5280804, HMDB0037362, CHEBI:68352)				22583754	network	details
human	Bacteroides stercoris HJ-15 (gm1113)	Ginsenoside Rg3 (9918693, HMDB0039546, CHEBI:67991)	Ginsenoside Rh2 (119307, CHEBI:77147)				11824558	network	details
human	Bacteroides stercoris HJ-15 (gm1113)	(20R)-Ginsenoside Rg3 (46887680, CHEBI:67990)	20(R)-Ginsenoside Rh2 (54580480)				11824558	network	details
human	Bacteroides stercoris HJ-15 (gm1113)	20(R)-Ginsenoside Rh2 (54580480)	Protopanaxadiol (9920281, CHEBI:76237)				11824558	network	details
human	Bacteroides stercoris (46506, gm0717)	Daidzein (5281708, HMDB0003312, CHEBI:28197)	Equol (91469, HMDB0002209, CHEBI:428126)				32218321	network	details
human	Bacteroides thetaiotaomicron VPI-5482 (226186, gm1036)	D-Glucose (5793, CHEBI:4167)	Acetate (175, CHEBI:30089)				32873608	network	details
human	Bacteroides thetaiotaomicron VPI-5482 (226186, gm1036)	D-Glucose (5793, CHEBI:4167)	Succinate (160419, CHEBI:30031)				32873608	network	details
human	Bacteroides thetaiotaomicron VPI-5482 (226186, gm1036)	D-Glucose (5793, CHEBI:4167)	Formate (283, CHEBI:15740)				32873608	network	details
human	Bacteroides thetaiotaomicron VPI-5482 (226186, gm1036)	D-Glucose (5793, CHEBI:4167)	Propionate (104745, CHEBI:17272)				32873608	network	details
human	Bacteroides thetaiotaomicron VPI-5482 (226186, gm1036)	D-Glucose (5793, CHEBI:4167)	Lactate (91435, CHEBI:24996)				32873608	network	details
human	Bacteroides thetaiotaomicron VPI-5482 (226186, gm1036)	D-Glucose (5793, CHEBI:4167)	Histidine (6274, HMDB0000177, CHEBI:15971)				32873608	network	details
human	Bacteroides thetaiotaomicron VPI-5482 (226186, gm1036)	D-Glucose (5793, CHEBI:4167)	L-Cysteine (5862, HMDB0000574, CHEBI:17561)				32873608	network	details
human	Bacteroides thetaiotaomicron VPI-5482 (226186, gm1036)	D-Glucose (5793, CHEBI:4167)	Cystine (595, CHEBI:17376)				32873608	network	details
human	Bacteroides thetaiotaomicron VPI-5482 (226186, gm1036)	D-Glucose (5793, CHEBI:4167)	Glutathione (124886, HMDB0000125, CHEBI:16856)				32873608	network	details
human	Bacteroides thetaiotaomicron VPI-5482 (226186, gm1036)	D-Glucose (5793, CHEBI:4167)	Asparagine (6267, HMDB0000168, CHEBI:17196)				32873608	network	details
human	Bacteroides thetaiotaomicron VPI-5482 (226186, gm1036)	D-Glucose (5793, CHEBI:4167)	DL-Alanine (602, HMDB0062251, CHEBI:16449)				32873608	network	details
human	Bacteroides thetaiotaomicron (818, gm0087)	Daidzein (5281708, HMDB0003312, CHEBI:28197)	Equol (91469, HMDB0002209, CHEBI:428126)				32218321	network	details
human	Bacteroides uniformis (820, gm0088)	Daidzein (5281708, HMDB0003312, CHEBI:28197)	Equol (91469, HMDB0002209, CHEBI:428126)				32218321	network	details
human	Bacteroides uniformis (820, gm0088)	Rutin (5280805, HMDB0003249, CHEBI:28527)	Quercetin (5280343, HMDB0005794, CHEBI:16243)				19580283	network	details
human	Bacteroides vulgatus (821, gm0089)			NFKB1 (4790)	Reduced	low-throughput	17485456	network	details
human	Bacteroides vulgatus (821, gm0089)			CXCL8 (3576)	Reduced	low-throughput	17485456	network	details
human	Bacteroidetes (976, gm0090)			NR1H4 (9971)	Reduced	low-throughput	30983011	network	details
human	Bacteroidetes (976, gm0090)			GLP1R (2740)	Elevated	low-throughput	30983011	network	details
human	Bacteroidetes (976, gm0090)		Acetate (175, CHEBI:30089)	C5AR1 (728)	Reduced	low-throughput	19865172	network	details
human	Bacteroidetes (976, gm0090)		Acetate (175, CHEBI:30089)	CXCR2 (3579)	Reduced	low-throughput	19865172	network	details
human	Bacteroidetes (976, gm0090)		Acetate (175, CHEBI:30089)	TNF (7124)	Reduced	low-throughput	19865172	network	details
human	Bacteroidetes (976, gm0090)		Acetate (175, CHEBI:30089)	CCL3 (6348)	Reduced	low-throughput	19865172	network	details
human	Bacteroidetes (976, gm0090)			NR1H4 (9971)	Reduced	low-throughput	30983011	network	details
human	Bacteroidetes (976, gm0090)			GLP1R (2740)	Elevated	low-throughput	30983011	network	details
human	Bacteroidetes (976, gm0090)		Acetate (175, CHEBI:30089)	C5AR1 (728)	Reduced	low-throughput	19865172	network	details
human	Bacteroidetes (976, gm0090)		Acetate (175, CHEBI:30089)	CXCR2 (3579)	Reduced	low-throughput	19865172	network	details
human	Bacteroidetes (976, gm0090)		Acetate (175, CHEBI:30089)	TNF (7124)	Reduced	low-throughput	19865172	network	details
human	Bacteroidetes (976, gm0090)		Acetate (175, CHEBI:30089)	CCL3 (6348)	Reduced	low-throughput	19865172	network	details
human	Bifidobacterium (1678, gm0105)		Trimethylamine oxide (1145, HMDB0000925, CHEBI:15724)				30469463	network	details
human	Bifidobacterium (1678, gm0105)	Chlorogenic acid (1794427, HMDB0003164, CHEBI:16112)	Caffeic acid (689043, HMDB0001964, CHEBI:16433)				24550206	network	details
human	Bifidobacterium (1678, gm0105)	Chlorogenic acid (1794427, HMDB0003164, CHEBI:16112)	Dihydrocaffeic acid (348154, HMDB0000423, CHEBI:48400)				24550206	network	details
human	Bifidobacterium (1678, gm0105)	Chlorogenic acid (1794427, HMDB0003164, CHEBI:16112)	3-(3-Hydroxyphenyl)propanoic acid (91, HMDB0000375, CHEBI:1427)				24550206	network	details
human	Bifidobacterium (1678, gm0105)	Chlorogenic acid (1794427, HMDB0003164, CHEBI:16112)	Dehydroxychlorogenic acid				24550206	network	details
human	Bifidobacterium (1678, gm0105)	Chlorogenic acid (1794427, HMDB0003164, CHEBI:16112)	Dihydrochlorogenic acid				24550206	network	details
human	Bifidobacterium (1678, gm0105)	Chlorogenic acid (1794427, HMDB0003164, CHEBI:16112)	2,3-Dihydroxypropyl (E)-3-(3,4-dihydroxyphenyl)prop-2-enoate (5315606)				24550206	network	details
human	Bifidobacterium (1678, gm0105)	Chlorogenic acid (1794427, HMDB0003164, CHEBI:16112)	Dihydrocaffeoyl-glycerol				24550206	network	details
human	Bifidobacterium (1678, gm0105)	Chlorogenic acid (1794427, HMDB0003164, CHEBI:16112)	3-Hydroxyphenethyl alcohol (83404)				24550206	network	details
human	Bifidobacterium (1678, gm0105)	Chlorogenic acid (1794427, HMDB0003164, CHEBI:16112)	Phenylacetic acid (999, HMDB0000209, CHEBI:30745)				24550206	network	details
human	Bifidobacterium (1678, gm0105)		Lactate (91435, CHEBI:24996)				21484167	network	details
human	Bifidobacterium (1678, gm0105)	Arbutin (440936, HMDB0029943, CHEBI:18305)	Hydroquinone (785, HMDB0002434, CHEBI:17594)	BCL2 (596)	Reduced	low-throughput	21889493	network	details
human	Bifidobacterium (1678, gm0105)	Arbutin (440936, HMDB0029943, CHEBI:18305)	Hydroquinone (785, HMDB0002434, CHEBI:17594)	BAX (581)	Elevated	low-throughput	21889493	network	details
human	Bifidobacterium (1678, gm0105)	Arbutin (440936, HMDB0029943, CHEBI:18305)	Hydroquinone (785, HMDB0002434, CHEBI:17594)	CASP3 (836)	Elevated	low-throughput	21889493	network	details
human	Bifidobacterium (1678, gm0105)		Folic acid (135398658, HMDB0000121, CHEBI:27470)				23594611	network	details
human	Bifidobacterium adolescentis B7304 (gm1102)	Genistin (5281377, HMDB0033988, CHEBI:27514)	Genistein (5280961, HMDB0003217, CHEBI:28088)				17439230	network	details
human	Bifidobacterium adolescentis B7304 (gm1102)	Glycitin (187808, HMDB0002219, CHEBI:80373)	Glycitein (5317750, HMDB0005781, CHEBI:542494)				17439230	network	details
human	Bifidobacterium adolescentis B7304 (gm1102)	Astragalin (5282102, HMDB0037429, CHEBI:30200)	Kaempferol (5280863, HMDB0005801, CHEBI:28499)				17439230	network	details
human	Bifidobacterium catenulatum B7377 (gm1103)	Daidzin (107971, HMDB0033991, CHEBI:42202)	Daidzein (5281708, HMDB0003312, CHEBI:28197)				17439230	network	details
human	Bifidobacterium catenulatum B7377 (gm1103)	Genistin (5281377, HMDB0033988, CHEBI:27514)	Genistein (5280961, HMDB0003217, CHEBI:28088)				17439230	network	details
human	Bifidobacterium catenulatum B7377 (gm1103)	Glycitin (187808, HMDB0002219, CHEBI:80373)	Glycitein (5317750, HMDB0005781, CHEBI:542494)				17439230	network	details
human	Bifidobacterium catenulatum B7377 (gm1103)	Astragalin (5282102, HMDB0037429, CHEBI:30200)	Kaempferol (5280863, HMDB0005801, CHEBI:28499)				17439230	network	details
human	Bifidobacterium pseudocatenulatum B7003 (gm1100)	Daidzin (107971, HMDB0033991, CHEBI:42202)	Daidzein (5281708, HMDB0003312, CHEBI:28197)				17439230	network	details
human	Bifidobacterium pseudocatenulatum B7003 (gm1100)	Genistin (5281377, HMDB0033988, CHEBI:27514)	Genistein (5280961, HMDB0003217, CHEBI:28088)				17439230	network	details
human	Bifidobacterium pseudocatenulatum B7003 (gm1100)	Glycitin (187808, HMDB0002219, CHEBI:80373)	Glycitein (5317750, HMDB0005781, CHEBI:542494)				17439230	network	details
human	Bifidobacterium pseudocatenulatum B7003 (gm1100)	Astragalin (5282102, HMDB0037429, CHEBI:30200)	Kaempferol (5280863, HMDB0005801, CHEBI:28499)				17439230	network	details
human	Bifidobacterium adolescentis MB 114 (gm0994)		Daidzein (5281708, HMDB0003312, CHEBI:28197)				18820905	network	details
human	Bifidobacterium adolescentis MB 114 (gm0995)		Daidzein (5281708, HMDB0003312, CHEBI:28197)				18820905	network	details
human	Bifidobacterium adolescentis MB 114 (gm0996)		Daidzein (5281708, HMDB0003312, CHEBI:28197)				18820905	network	details
human	Bifidobacterium adolescentis (1680, gm0106)			NFKB1 (4790)	Reduced	low-throughput	17485456	network	details
human	Bifidobacterium adolescentis (1680, gm0106)			CXCL8 (3576)	Reduced	low-throughput	17485456	network	details
human	Bifidobacterium adolescentis B7304 (gm1102)	Daidzin (107971, HMDB0033991, CHEBI:42202)	Daidzein (5281708, HMDB0003312, CHEBI:28197)				17439230	network	details
human	Bifidobacterium animalis (28025, gm0107)	Chlorogenic acid (1794427, HMDB0003164, CHEBI:16112)	Caffeic acid (689043, HMDB0001964, CHEBI:16433)				11412317	network	details
human	Bifidobacterium animalis (28025, gm0107)	Chlorogenic acid (1794427, HMDB0003164, CHEBI:16112)	Quinic acid (6508, HMDB0003072, CHEBI:17521)				11412317	network	details
human	Bifidobacterium animalis subsp. lactis BB-12 (552531, gm1121)			TNF (7124)	Elevated	low-throughput	31780030	network	details
human	Bifidobacterium bifidum MB 254 (gm0997)		Daidzein (5281708, HMDB0003312, CHEBI:28197)				18820905	network	details
human	Bifidobacterium bifidum (1681, gm0108)	Daidzein (5281708, HMDB0003312, CHEBI:28197)	Equol (91469, HMDB0002209, CHEBI:428126)				31168326	network	details
human	Bifidobacterium breve MB 234 (gm0998)		Daidzein (5281708, HMDB0003312, CHEBI:28197)				18820905	network	details
human	Bifidobacterium breve MB 235 (gm0999)		Daidzein (5281708, HMDB0003312, CHEBI:28197)				18820905	network	details
human	Bifidobacterium breve B7824 (gm1104)	Daidzin (107971, HMDB0033991, CHEBI:42202)	Daidzein (5281708, HMDB0003312, CHEBI:28197)				17439230	network	details
human	Bifidobacterium breve B7824 (gm1104)	Genistin (5281377, HMDB0033988, CHEBI:27514)	Genistein (5280961, HMDB0003217, CHEBI:28088)				17439230	network	details
human	Bifidobacterium breve B7824 (gm1104)	Glycitin (187808, HMDB0002219, CHEBI:80373)	Glycitein (5317750, HMDB0005781, CHEBI:542494)				17439230	network	details
human	Bifidobacterium breve B7824 (gm1104)	Astragalin (5282102, HMDB0037429, CHEBI:30200)	Kaempferol (5280863, HMDB0005801, CHEBI:28499)				17439230	network	details
human	Bifidobacterium catenulatum subsp. kashiwanohense APCKJ1 (gm1078)	Galbeta1,3GlcNAc (440994, CHEBI:27707)	Lacto-N-tetraose (440993, HMDB0006566, CHEBI:30248)				31659215	network	details
human	Bifidobacterium catenulatum subsp. kashiwanohense APCKJ1 (gm1078)	N-Acetyl-D-lactosamine (9800166, CHEBI:60152)	beta-D-Gal-(1->4)-beta-D-GlcNAc-(1->3)-beta-D-Gal-(1->4)-D-Glc (9831622, HMDB0006567, CHEBI:60239)				31659215	network	details
human	Bifidobacterium dentium ATCC 27678 (473819, gm0952)		Acetate (175, CHEBI:30089)	Htr1a (15550)	Elevated	low-throughput	32795610	network	details
human	Bifidobacterium dentium (1689, gm0111)	Rutin (5280805, HMDB0003249, CHEBI:28527)	Quercetin (5280343, HMDB0005794, CHEBI:16243)				25179902	network	details
human	Bifidobacterium dentium (1689, gm0111)	Poncirin (442456, HMDB0037487, CHEBI:66773)	Ponciretin (25201019)				25179902	network	details
human	Bifidobacterium infantis MB 208 (gm1000)		Daidzein (5281708, HMDB0003312, CHEBI:28197)				18820905	network	details
human	Bifidobacterium lactis MB 238 (gm1001)		Daidzein (5281708, HMDB0003312, CHEBI:28197)				18820905	network	details
human	Bifidobacterium longum (216816, gm0112)		Dihydrocaffeic acid (348154, HMDB0000423, CHEBI:48400)				31235863	network	details
human	Bifidobacterium longum IPLA E44 (gm0993)	Exopolysaccharides (CHEBI:72813)	Lactate (91435, CHEBI:24996)				19735956	network	details
human	Bifidobacterium longum MB 201 (gm1002)		Daidzein (5281708, HMDB0003312, CHEBI:28197)				18820905	network	details
human	Bifidobacterium longum MB 207 (gm1003)		Daidzein (5281708, HMDB0003312, CHEBI:28197)				18820905	network	details
human	Bifidobacterium longum MB 219 (gm1004)		Daidzein (5281708, HMDB0003312, CHEBI:28197)				18820905	network	details
human	Bifidobacterium longum (216816, gm0112)	Xyloglucan Heptasaccharide (44630346, HMDB0006611)	Acetate (175, CHEBI:30089)				28667113	network	details
human	Bifidobacterium longum (216816, gm0112)	Xyloglucan Heptasaccharide (44630346, HMDB0006611)	Lactate (91435, CHEBI:24996)				28667113	network	details
human	Bifidobacterium longum (216816, gm0112)			CYP7A1 (1581)	Reduced	low-throughput	29800811	network	details
human	Bifidobacterium longum (216816, gm0112)			GPBAR1 (151306)	Elevated	low-throughput	29112296	network	details
human	Bifidobacterium longum HY8001 (gm1074)	Geniposide (107848, CHEBI:5299)	Genipin (442424, HMDB0035830, CHEBI:5298)				22553067	network	details
human	Bifidobacterium longum H-1 (gm1098)	Ginsenoside Rb1 (9898279, HMDB0035892, CHEBI:67989)	Ginsenoside-Rd (24721561, HMDB0035778)				22466563	network	details
human	Bifidobacterium longum H-1 (gm1098)	Loganin (87691, CHEBI:15771)	Loganetin (10466307)				22466563	network	details
human	Bifidobacterium longum H-1 (gm1098)	Arctiin (100528, CHEBI:80793)	Arctigenin (64981, CHEBI:391051)				22466563	network	details
human	Bifidobacterium longum H-1 (gm1098)	Arbutin (440936, HMDB0029943, CHEBI:18305)	Hydroquinone (785, HMDB0002434, CHEBI:17594)				22466563	network	details
human	Bifidobacterium longum subsp. infantis B7875 (gm1101)	Daidzin (107971, HMDB0033991, CHEBI:42202)	Daidzein (5281708, HMDB0003312, CHEBI:28197)				17439230	network	details
human	Bifidobacterium longum subsp. infantis B7875 (gm1101)	Genistin (5281377, HMDB0033988, CHEBI:27514)	Genistein (5280961, HMDB0003217, CHEBI:28088)				17439230	network	details
human	Bifidobacterium longum subsp. infantis B7875 (gm1101)	Glycitin (187808, HMDB0002219, CHEBI:80373)	Glycitein (5317750, HMDB0005781, CHEBI:542494)				17439230	network	details
human	Bifidobacterium longum subsp. infantis B7875 (gm1101)	Astragalin (5282102, HMDB0037429, CHEBI:30200)	Kaempferol (5280863, HMDB0005801, CHEBI:28499)				17439230	network	details
human	Bifidobacterium longum subsp. infantis ATCC 15697 = JCM 1222 = DSM 20088 (391904, gm0910)			OCLN (100506658)	Reduced	low-throughput	28230606	network	details
human	Bifidobacterium pseudocatenulatum WC 0400 (gm0987)	Hesperidin (10621, HMBD0003265, CHEBI:28775)	Aglycone (CHEBI:166892)				25875120	network	details
human	Bifidobacterium pseudocatenulatum WC 0401 (gm0988)	Hesperidin (10621, HMBD0003265, CHEBI:28775)	Aglycone (CHEBI:166892)				25875120	network	details
human	Bifidobacterium pseudocatenulatum WC 0403 (gm0989)	Hesperidin (10621, HMBD0003265, CHEBI:28775)	Aglycone (CHEBI:166892)				25875120	network	details
human	Bifidobacterium pseudocatenulatum WC 0407 (gm0990)	Hesperidin (10621, HMBD0003265, CHEBI:28775)	Aglycone (CHEBI:166892)				25875120	network	details
human	Bifidobacterium pseudocatenulatum WC 0408 (gm0991)	Hesperidin (10621, HMBD0003265, CHEBI:28775)	Aglycone (CHEBI:166892)				25875120	network	details
human	Bifidobacterium pseudocatenulatum MB 264 (gm1005)		Daidzein (5281708, HMDB0003312, CHEBI:28197)				18820905	network	details
human	Blautia (572511, gm0117)		Trimethylamine oxide (1145, HMDB0000925, CHEBI:15724)				30469463	network	details
human	Blautia (572511, gm0117)		Alanine (5950, HMDB0062251, CHEBI:16977)				31235863	network	details
human	Blautia (572511, gm0117)		Leucine (6106, HMDB0000687, CHEBI:15603)				31235863	network	details
human	Blautia (572511, gm0117)		l-Isoleucine (6306, HMDB0000172, CHEBI:17191)				31235863	network	details
human	Blautia (572511, gm0117)		Glycine (750, HMDB0000123, CHEBI:15428)				31235863	network	details
human	Blautia (572511, gm0117)		Proline (145742, HMDB0000162, CHEBI:17203)				31235863	network	details
human	Blautia (572511, gm0117)		Serine (5951, HMDB0000187, CHEBI:17115)				31235863	network	details
human	Blautia faecis M25(T) (gm1152)	D-Glucose (5793, HMDB0000122, CHEBI:4167)	Acetate (175, CHEBI:30089)				22544782	network	details
human	Blautia faecis M25(T) (gm1152)	D-Glucose (5793, HMDB0000122, CHEBI:4167)	Lactate (91435, CHEBI:24996)				22544782	network	details
human	Blautia obeum (40520, gm0822)	2-Amino-1-methyl-6-phenylimidazo[4,5-b]pyridine (1530, CHEBI:76290)	7-Hydroxy-5-methyl-3-phenyl-6,7,8,9-tetrahydropyrido[3',2':4,5]imidazo[1,2-a]pyrimidin-5-ium chloride (129849310)				31096909	network	details
human	Blautia producta (33035, gm1176)	Matairesinol (119205, HMDB0035698, CHEBI:6698)	2,3-Bis(3,4-dihydroxybenzyl)butyrolactone (500189)				16765860	network	details
human	Blautia producta (33035, gm1176)	Secoisolariciresinol (65373, HMDB0013692, CHEBI:65004)	Enterodiol (115089, HMDB0005056, CHEBI:544560)				16765860	network	details
human	Blautia producta SNU-Julong 732 (33035, gm1179)	Daidzein (5281708, HMDB0003312, CHEBI:28197)	Equol (91469, HMDB0002209, CHEBI:428126)				19580283	network	details
human	Blautia producta SNU-Julong 732 (33035, gm1179)	Dihydrodaidzein (176907, HMDB0005760, CHEBI:75842)	Equol (91469, HMDB0002209, CHEBI:428126)				19580283	network	details
human	Blautia sp. MRG-PMF1 (gm1029)	5,7-Dimethoxyflavone (88881, HMDB0036620, CHEBI:3684)	Chrysin (5281607, HMDB0036619, CHEBI:75095)				25437273	network	details
human	Blautia sp. MRG-PMF1 (gm1029)	4',5,7-Trimethoxyflavone (79730, HMDB0030842, CHEBI:174981)	Apigenin (5280443, HMDB0002124, CHEBI:18388)				25437273	network	details
human	Blautia sp. AUH-JLD56 (gm1114)	Arctigenin (64981, CHEBI:391051)	3'-desmethylarctigenin				24236649	network	details
human	Butyricicoccus pullicaecorum (501571, gm0135)		Glycocholic acid (10140, HMDB0000138, CHEBI:17687)				31235863	network	details
human	Butyricimonas synergistica MT01(T) (gm1136)	D-Glucose (5793, HMDB0000122, CHEBI:4167)	Isobutyric acid (6590, HMDB0001873, CHEBI:16135)				19542124	network	details
human	Butyricimonas synergistica MT01(T) (gm1136)	D-Glucose (5793, HMDB0000122, CHEBI:4167)	Butyrate (104775, CHEBI:17968)				19542124	network	details
human	Butyricimonas virosa MT12(T) (gm1135)	D-Glucose (5793, HMDB0000122, CHEBI:4167)	Isobutyric acid (6590, HMDB0001873, CHEBI:16135)				19542124	network	details
human	Butyricimonas virosa MT12(T) (gm1135)	D-Glucose (5793, HMDB0000122, CHEBI:4167)	Butyrate (104775, CHEBI:17968)				19542124	network	details
human	Clostridium (1485, gm0187)		Butyrate (104775, CHEBI:17968)				30359203	network	details
human	Clostridium (1485, gm0187)		2-Imino-1-methylimidazolidin-4-one (588, HMDB0000562, CHEBI:16737)				31235863	network	details
human	Clostridium (1485, gm0187)	DL-Alanine (602, HMDB0062251, CHEBI:16449)	Pyruvate (107735, CHEBI:15361)				22325238	network	details
human	Clostridium (1485, gm0187)	Glycine (750, HMDB0000123, CHEBI:15428)	Acetyl phosphate(2-) (4183249, CHEBI:22191)				22325238	network	details
human	Clostridium asparagiforme DSM 15981 (518636, gm1010)	D-Glucose (5793, HMDB0000122, CHEBI:4167)	Acetate (175, CHEBI:30089)				16337765	network	details
human	Clostridium asparagiforme DSM 15981 (518636, gm1010)	D-Glucose (5793, HMDB0000122, CHEBI:4167)	Lactate (91435, CHEBI:24996)				16337765	network	details
human	Clostridium asparagiforme DSM 15981 (518636, gm1010)	D-Glucose (5793, HMDB0000122, CHEBI:4167)	Ethanol (702, HMDB0000108, CHEBI:16236)				16337765	network	details
human	Clostridium butyricum ATCC 19398 (1492, gm1099)		Butyrate (104775, CHEBI:17968)	FFAR2 (2867)	Elevated	low-throughput	31734354	network	details
human	Clostridium butyricum ATCC 19398 (1492, gm1099)		Butyrate (104775, CHEBI:17968)	HCAR2 (338442)	Elevated	low-throughput	31734354	network	details
human	Clostridium butyricum ATCC 19398 (1492, gm1099)		Butyrate (104775, CHEBI:17968)	CDKN1A (1026)	Elevated	low-throughput	31734354	network	details
human	Clostridium cadaveris BB88A (gm1108)	Tryptophan (6305, CHEBI:16828)	3-Indolepropionic acid (3744, HMDB0002302, CHEBI:43580)				29168502	network	details
human	Clostridium cadaveris CC44 001G (1073356, gm1109)	Tryptophan (6305, CHEBI:16828)	3-Indolepropionic acid (3744, HMDB0002302, CHEBI:43580)				29168502	network	details
human	Clostridium cadaveris CC40 001C (1073356, gm1110)	Tryptophan (6305, CHEBI:16828)	3-Indolepropionic acid (3744, HMDB0002302, CHEBI:43580)				29168502	network	details
human	Clostridium orbiscindens I1 (gm0897)	Hesperetin dihydrochalcone (147608, HMDB0128062)	3-Hydroxy-4-methoxybenzenepropanoic acid (2752054, HMDB0131138)				15740074	network	details
human	Clostridium orbiscindens I2 (gm0965)	Taxifolin (439533, CHEBI:17948)	3,4-Dihydroxyphenylacetic acid (547, HMDB0001336, CHEBI:41941)				14532034	network	details
human	Clostridium orbiscindens I2 (gm0965)	Quercetin (5280343, HMDB0005794, CHEBI:16243)	3,4-Dihydroxyphenylacetic acid (547, HMDB0001336, CHEBI:41941)				14532034	network	details
human	Clostridium orbiscindens I2 (gm0965)	Eriodictyol (440735, HMDB0005810, CHEBI:28412)	Dihydrocaffeic acid (348154, HMDB0000423, CHEBI:48400)				14532034	network	details
human	Clostridium orbiscindens I2 (gm0965)	Luteolin (5280445, HMDB0005800, CHEBI:15864)	Dihydrocaffeic acid (348154, HMDB0000423, CHEBI:48400)				14532034	network	details
human	Clostridium orbiscindens I2 (gm0965)	Apigenin (5280443, HMDB0002124, CHEBI:18388)	3-(4-Hydroxyphenyl)propionic acid (10394, HMDB0002199, CHEBI:32980)				14532034	network	details
human	Clostridium orbiscindens I2 (gm0965)	5,7-Dihydroxy-2-(4-hydroxyphenyl)chroman-4-one (932, HMDB0128074, CHEBI:50202)	3-(4-Hydroxyphenyl)propionic acid (10394, HMDB0002199, CHEBI:32980)				14532034	network	details
human	Clostridium orbiscindens I2 (gm0965)	Phloretin (4788, HMDB0003306, CHEBI:17276)	3-(4-Hydroxyphenyl)propionic acid (10394, HMDB0002199, CHEBI:32980)				14532034	network	details
human	Clostridium pasteurianum (1501, gm0817)	D-Glucose (5793, HMDB0000122, CHEBI:4167)	Acetate (175, CHEBI:30089)				22018234	network	details
human	Clostridium pasteurianum (1501, gm0817)	D-Glucose (5793, HMDB0000122, CHEBI:4167)	Butyrate (104775, CHEBI:17968)				22018234	network	details
human	Clostridium scindens VPI 12708 (29347, gm0885)	Bile acid (439520, CHEBI:22868)	Deoxycholic acid (222528, HMDB0000626, CHEBI:28834)				23836456	network	details
human	Clostridium scindens VPI 12708 (29347, gm0885)	Cholic acid (221493, HMDB0000619, CHEBI:16359)	Deoxycholic acid (222528, HMDB0000626, CHEBI:28834)				23836456	network	details
human	Clostridium scindens VPI 12708 (29347, gm0885)	Chenodeoxycholic acid (10133, HMDB0000518, CHEBI:16755)	Deoxycholic acid (222528, HMDB0000626, CHEBI:28834)				23836456	network	details
human	Clostridium scindens VPI 12708 (29347, gm0885)	Bile acid (439520, CHEBI:22868)	Lithocholic acid (9903, HMDB0000761, CHEBI:16325)				23836456	network	details
human	Clostridium scindens VPI 12708 (29347, gm0885)	Cholic acid (221493, HMDB0000619, CHEBI:16359)	Lithocholic acid (9903, HMDB0000761, CHEBI:16325)				23836456	network	details
human	Clostridium scindens VPI 12708 (29347, gm0885)	Chenodeoxycholic acid (10133, HMDB0000518, CHEBI:16755)	Lithocholic acid (9903, HMDB0000761, CHEBI:16325)				23836456	network	details
human	Clostridium scindens ATCC35704 (411468, gm1076)	Bile acid (439520, CHEBI:22868)	Deoxycholic acid (222528, HMDB0000626, CHEBI:28834)				28066726	network	details
human	Clostridium scindens ATCC35704 (411468, gm1076)	Bile acid (439520, CHEBI:22868)	Lithocholic acid (9903, HMDB0000761, CHEBI:16325)				28066726	network	details
human	Clostridium scindens ATCC 35704 (411468, gm1133)	D-Glucose (5793, HMDB0000122, CHEBI:4167)	Ethanol (702, HMDB0000108, CHEBI:16236)				30737348	network	details
human	Clostridium scindens ATCC 35704 (411468, gm1133)	D-Glucose (5793, HMDB0000122, CHEBI:4167)	Acetate (175, CHEBI:30089)				30737348	network	details
human	Clostridium scindens ATCC 35704 (411468, gm1133)	D-Glucose (5793, HMDB0000122, CHEBI:4167)	Formate (283, CHEBI:15740)				30737348	network	details
human	Clostridium scindens ATCC 35704 (411468, gm1133)	D-Glucose (5793, HMDB0000122, CHEBI:4167)	Hydrogen (783, HMDB0001362, CHEBI:18276)				30737348	network	details
human	Clostridium scindens (29347, gm0208)	Secoisolariciresinol (65373, HMDB0013692, CHEBI:65004)	Enterodiol (115089, HMDB0005056, CHEBI:544560)				16765860	network	details
human	Clostridium sp. TM-40 (371143, gm0893)	Daidzein (5281708, HMDB0003312, CHEBI:28197)	Dihydrodaidzein (176907, HMDB0005760, CHEBI:75842)				17113326	network	details
human	Clostridium sp. TM-40 (371143, gm0893)	Daidzin (107971, HMDB0033991, CHEBI:42202)	Dihydrodaidzein (176907, HMDB0005760, CHEBI:75842)				17113326	network	details
human	Clostridium sp. L2-50 (411489, gm0958)		Acetate (175, CHEBI:30089)				12324374	network	details
human	Clostridium sp. TM-40 (371143, gm0893)		Dihydrodaidzein (176907, HMDB0005760, CHEBI:75842)				25045313	network	details
human	Clostridium sp. HGH6 (gm1064)	daidzein (5281708, HMDB0003312, CHEBI:28197)	Dihydrodaidzein (176907, HMDB0005760, CHEBI:75842)				15640190	network	details
human	Clostridium sp. HGH6 (gm1064)	Daidzein (5281708, HMDB0003312, CHEBI:28197)	2,4-Dioxopentanedioic acid (444873, CHEBI:42056)				20237913	network	details
human	Clostridium sp. HGH136 (gm1079)	Daidzein (5281708, HMDB0003312, CHEBI:28197)	6'-Hydroxy-O-desmethylangolensin (20601635, HMDB0041695, CHEBI:88662)				20237913	network	details
human	Clostridium sp. (1506, gm0210)		Ethyl phenyllactate, (-)- (9877619, HMDB0032618)				29572891	network	details
human	Clostridium sp. (1506, gm0210)		(R)-3-(4-Hydroxyphenyl)lactate (9548632, CHEBI:10980)				29572891	network	details
human	Clostridium sp. HGH136 (gm1140)	Daidzein (5281708, HMDB0003312, CHEBI:28197)	O-Desmethylangolensin (89472, HMDB0004629, CHEBI:88902)				12070764	network	details
human	Clostridium sp. SDG-Mt85-3Db (1506, gm1169)	Secoisolariciresinol diglucoside (9917980, HMDB0036323)	Secoisolariciresinol (65373, HMDB0013692, CHEBI:65004)				16765860	network	details
human	Clostridium sporogenes ATCC15579 (gm1037)	Levodopa (6047, HMDB0000181, CHEBI:15765)	Dihydrocaffeic acid (348154, HMDB0000423, CHEBI:48400)				33076930	network	details
human	Clostridium sporogenes ATCC15579 (gm1037)	5-Hydroxytryptophan (144, CHEBI:28171)	2-Hydroxy-3-(5-hydroxy-1H-indol-3-yl)propanoic acid (192215)				33076930	network	details
human	Clostridium sporogenes Ll.LtrB-eryR ΩfldC (gm1038)	Tryptophan (6305, HMDB0000929, CHEBI:16828)	Indole-3-lactic acid (92904, CHEBI:24813)				33076930	network	details
human	Clostridium sporogenes Ll.LtrB-eryR ΩfldC (gm1038)	Tyrosine (6057, HMDB0000158, CHEBI:17895)	2-Hydroxy-3-(4-hydroxyphenyl)propanoic acid (9378, HMDB0000755, CHEBI:17385)				33076930	network	details
human	Clostridium sporogenes Ll.LtrB-eryR ΩfldC (gm1038)	Levodopa (6047, HMDB0000181, CHEBI:15765)	3-(3,4-Dihydroxyphenyl)-2-hydroxypropanoic acid (439435, HMDB0003503, CHEBI:17807)				33076930	network	details
human	Clostridium sporogenes ATCC 15579 (471871, gm1012)	Phenylalanine (6140, CHEBI:17295)	3-Phenylpropionic acid (107, CHEBI:28631)				29168502	network	details
human	Clostridium sporogenes ATCC 15579 (471871, gm1012)	Tyrosine (6057, CHEBI:17895)	3-(4-Hydroxyphenyl)propionic acid (10394, CHEBI:32980)				29168502	network	details
human	Clostridium sporogenes ATCC 15579 (471871, gm1012)	Tryptophan (6305, CHEBI:16828)	3-Indolepropionic acid (3744, HMDB0002302, CHEBI:43580)				29168502	network	details
human	Clostridium tyrobutyricum (1519, gm0693)		Butyrate (104775, CHEBI:17968)	ANGPTL4 (51129)	Elevated	low-throughput	23518684	network	details
human	Eubacterium (1730, gm0309)		3-Indolepropionic acid (3744, HMDB0002302, CHEBI:43580)				31030641	network	details
human	Eubacterium (1730, gm0309)		3-Hydroxybenzoic acid (7420, HMDB0002466, CHEBI:30764)				31235863	network	details
human	Eubacterium (1730, gm0309)		4-Hydroxybenzoic acid (135, HMDB0000500, CHEBI:30763)				31235863	network	details
human	Eubacterium (1730, gm0309)	Arbutin (440936, HMDB0029943, CHEBI:18305)	Hydroquinone (785, HMDB0002434, CHEBI:17594)	BCL2 (596)	Reduced	low-throughput	21889493	network	details
human	Eubacterium (1730, gm0309)	Arbutin (440936, HMDB0029943, CHEBI:18305)	Hydroquinone (785, HMDB0002434, CHEBI:17594)	BAX (581)	Elevated	low-throughput	21889493	network	details
human	Eubacterium (1730, gm0309)	Arbutin (440936, HMDB0029943, CHEBI:18305)	Hydroquinone (785, HMDB0002434, CHEBI:17594)	CASP3 (836)	Elevated	low-throughput	21889493	network	details
human	Eubacterium dolichum (1263076, gm0311)		3-Indolepropionic acid (3744, HMDB0002302, CHEBI:43580)				31030641	network	details
human	Eubacterium hallii (39488, gm0314)		Butyrate (104775, CHEBI:17968)				28894218	network	details
human	Eubacterium limosum (1736, gm0315)	Isoxanthohumol (513197, CHEBI:171798)	8-Prenylnaringenin (480764, CHEBI:50207)				16076107	network	details
human	Eubacterium limosum (1736, gm0315)		Butyrate (104775, CHEBI:17968)				28894218	network	details
human	Eubacterium limosum ATCC 8486 (gm1065)	Biochanin A (5280373, HMDB0002338, CHEBI:17574)	Genistein (5280961, HMDB0003217, CHEBI:28088)				11040423	network	details
human	Eubacterium limosum ATCC 8486 (gm1065)	Formononetin (5280378, HMDB0005808, CHEBI:18088)	Daidzein (5281708, HMDB0003312, CHEBI:28197)				11040423	network	details
human	Eubacterium limosum ATCC 8486 (gm1065)	Glycitein (5317750, HMDB0005781, CHEBI:542494)	6,7,4'-Trihydroxyisoflavone (5284649, HMDB0031715, CHEBI:74957)				11040423	network	details
human	Eubacterium limosum (1736, gm0315)	Glycitein (5317750, HMDB0005781, CHEBI:542494)	6,7,4'-Trihydroxyisoflavone (5284649, HMDB0031715, CHEBI:74957)				26861391	network	details
human	Eubacterium limosum (1736, gm0315)	Glycitein (5317750, HMDB0005781, CHEBI:542494)	Dihydroglycitein (101101166, CHEBI:174736)				26861391	network	details
human	Eubacterium limosum (1736, gm0315)		Butyrate (104775, CHEBI:17968)	IL6 (3569)	Reduced	low-throughput	16534848	network	details
human	Eubacterium limosum (1736, gm0315)		Acetate (175, CHEBI:30089)	IL6 (3569)	Reduced	low-throughput	16534848	network	details
human	Eubacterium limosum (1736, gm0315)		Propionate (104745, CHEBI:17272)	IL6 (3569)	Reduced	low-throughput	16534848	network	details
human	Eubacterium limosum (1736, gm0315)		Butyrate (104775, CHEBI:17968)	TLR4 (7099)	Reduced	low-throughput	16534848	network	details
human	Eubacterium limosum (1736, gm0315)	Glycitein (5317750, HMDB0005781, CHEBI:542494)	6,7,4'-Trihydroxyisoflavone (5284649, HMDB0031715, CHEBI:74957)				19580283	network	details
human	Eubacterium limosum (1736, gm0315)	Isoxanthohumol (513197, CHEBI:171798)	8-Prenylnaringenin (480764, CHEBI:50207)				19580283	network	details
human	Eubacterium ramulus ATTC 29099 (gm0891)	Cynaroside (5280637, HMDB0035588, CHEBI:27994)	Phenolic acid (CHEBI:166890)				10648107	network	details
human	Eubacterium ramulus ATTC 29099 (gm0891)	Taxifolin (439533, CHEBI:17948)	Phenolic acid (CHEBI:166890)				10648107	network	details
human	Eubacterium ramulus ATTC 29099 (gm0891)	Phloretin (4788, HMDB0003306, CHEBI:17276)	Phenolic acid (CHEBI:166890)				10648107	network	details
human	Eubacterium ramulus ATTC 29099 (gm0891)	Luteolin (5280445, HMDB0005800, CHEBI:15864)	Phenolic acid (CHEBI:166890)				10648107	network	details
human	Eubacterium ramulus ATTC 29099 (gm0891)	Naringenin (439246, HMDB0128074, CHEBI:17846)	Phenolic acid (CHEBI:166890)				10648107	network	details
human	Eubacterium ramulus ATTC 29099 (gm0891)	Eriodictyol (440735, HMDB0005810, CHEBI:28412)	Phenolic acid (CHEBI:166890)				10648107	network	details
human	Eubacterium ramulus ATTC 29099 (gm0891)	Kaempferol (5280863, HMDB0005801, CHEBI:28499)	Phenolic acid (CHEBI:166890)				10648107	network	details
human	Eubacterium ramulus ATTC 29099 (gm0891)	Rutin (5280805, HMDB0003249, CHEBI:28527)	Phenolic acid (CHEBI:166890)				10648107	network	details
human	Eubacterium ramulus ATTC 29099 (gm0891)	Quercetin (5280343, HMDB0005794, CHEBI:16243)	Phenolic acid (CHEBI:166890)				10648107	network	details
human	Eubacterium ramulus ATTC 29099 (gm0891)	Isoquercitrin (5280804, HMDB0037362, CHEBI:68352)	Acetate (175, CHEBI:30089)				10648107	network	details
human	Eubacterium ramulus ATTC 29099 (gm0891)	Isoquercitrin (5280804, HMDB0037362, CHEBI:68352)	Butyrate (104775, CHEBI:17968)				10648107	network	details
human	Eubacterium ramulus ATTC 29099 (gm0891)	Isoquercitrin (5280804, HMDB0037362, CHEBI:68352)	Kaempferol-3-sorphoroside				10648107	network	details
human	Eubacterium ramulus ATTC 29099 (gm0891)	Isoquercitrin (5280804, HMDB0037362, CHEBI:68352)	3,4-Dihydroxyphenylacetic acid (547, HMDB0001336, CHEBI:41941)				10648107	network	details
human	Eubacterium ramulus ATTC 29099 (gm0891)	Taxifolin (439533, CHEBI:17948)	3,4-Dihydroxyphenylacetic acid (547, HMDB0001336, CHEBI:41941)				10648107	network	details
human	Eubacterium ramulus ATTC 29099 (gm0891)	Luteolin (5280445, HMDB0005800, CHEBI:15864)	Dihydrocaffeic acid (348154, HMDB0000423, CHEBI:48400)				10648107	network	details
human	Eubacterium ramulus ATTC 29099 (gm0891)	Eriodictyol (440735, HMDB0005810, CHEBI:28412)	Dihydrocaffeic acid (348154, HMDB0000423, CHEBI:48400)				10648107	network	details
human	Eubacterium ramulus ATTC 29099 (gm0891)	Kaempferol (5280863, HMDB0005801, CHEBI:28499)	4-Hydroxyphenylacetic acid (127, HMDB0000020, CHEBI:18101)				10648107	network	details
human	Eubacterium ramulus ATTC 29099 (gm0891)	Naringenin (439246, HMDB0128074, CHEBI:17846)	3-(4-Hydroxyphenyl)propionic acid (10394, HMDB0002199, CHEBI:32980)				10648107	network	details
human	Eubacterium ramulus ATTC 29099 (gm0891)	Kaempferol-3-sorphoroside-7-glucoside	Kaempferol-3-sorphoroside				10648107	network	details
human	Eubacterium ramulus ATTC 29099 (gm0891)	Quercetin (5280343, HMDB0005794, CHEBI:16243)	3,4-Dihydroxyphenylacetic acid (547, HMDB0001336, CHEBI:41941)				10648107	network	details
human	Eubacterium ramulus ATTC 29099 (gm0891)		Phloroglucinol (359, HMDB0013675, CHEBI:16204)				10648107	network	details
human	Eubacterium ramulus DSM 16296 (gm0898)	beta-D-Glucopyranoside, 3,5-dihydroxy-4-(3-(3-hydroxy-4-methoxyphenyl)-1-oxopropyl)phenyl (168008)	Hesperetin dihydrochalcone (147608, HMDB0128062)				15740074	network	details
human	Eubacterium ramulus DSM 16296 (gm0898)	Hesperetin dihydrochalcone (147608, HMDB0128062)	3-Hydroxy-4-methoxybenzenepropanoic acid (2752054, HMDB0131138)				15740074	network	details
human	Eubacterium ramulus (39490, gm0737)	Genistein 7-O-glucoside (44257273)	2-(4-Hydroxyphenyl)propionic acid, (2S)- (6971268)				11959436	network	details
human	Eubacterium ramulus (39490, gm0737)	Genistein (5280961, HMDB0003217, CHEBI:28088)	2-(4-Hydroxyphenyl)propionic acid, (2S)- (6971268)				11959436	network	details
human	Eubacterium ramulus (39490, gm0737)	Daidzein (5281708, HMDB0003312, CHEBI:28197)	O-Desmethylangolensin (89472, HMDB0004629, CHEBI:88902)				11959436	network	details
human	Eubacterium ramulus (39490, gm0737)	Quercetin (5280343, HMDB0005794, CHEBI:16243)	3,4-Dihydroxyphenylacetic acid (547, HMDB0001336, CHEBI:41941)				11722907	network	details
human	Eubacterium ramulus (39490, gm0737)	Luteolin (5280445, HMDB0005800, CHEBI:15864)	Dihydrocaffeic acid (348154, HMDB0000423, CHEBI:48400)				11722907	network	details
human	Eubacterium ramulus (39490, gm0737)	Isoquercitrin (5280804, HMDB0037362, CHEBI:68352)	3,4-Dihydroxyphenylacetic acid (547, HMDB0001336, CHEBI:41941)				9914304	network	details
human	Eubacterium ramulus (39490, gm0737)	Isoquercitrin (5280804, HMDB0037362, CHEBI:68352)	Acetate (175, CHEBI:30089)				9914304	network	details
human	Eubacterium ramulus (39490, gm0737)	Isoquercitrin (5280804, HMDB0037362, CHEBI:68352)	Butyrate (104775, CHEBI:17968)				9914304	network	details
human	Eubacterium ramulus (39490, gm0737)	Isoquercitrin (5280804, HMDB0037362, CHEBI:68352)	3,4-Dihydroxyphenylacetic acid (547, HMDB0001336, CHEBI:41941)				12747214	network	details
human	Eubacterium ramulus (39490, gm0737)	5,7-Dihydroxy-2-(4-hydroxyphenyl)chroman-4-one (932, HMDB0002670, CHEBI:50202)	Naringenin chalcone (5280960, HMDB0029631, CHEBI:15413)				15127184	network	details
human	Eubacterium ramulus (39490, gm0737)	Naringenin chalcone (5280960, HMDB0029631, CHEBI:15413)	Phloretin (4788, HMDB0003306, CHEBI:17276)				15127184	network	details
human	Eubacterium ramulus (39490, gm0737)	Phloretin (4788, HMDB0003306, CHEBI:17276)	Phloroglucinol (359, CHEBI:16204)				15127184	network	details
human	Eubacterium ramulus (39490, gm0737)	Phloretin (4788, HMDB0003306, CHEBI:17276)	3-(4-Hydroxyphenyl)propionic acid (10394, HMDB0002199, CHEBI:32980)				15127184	network	details
human	Eubacterium ramulus (39490, gm0737)	Apigenin (5280443, HMDB0002124, CHEBI:18388)	Naringenin (439246, HMDB0002670, CHEBI:50202)				15466559	network	details
human	Eubacterium ramulus (39490, gm0737)	Naringenin (439246, HMDB0002670, CHEBI:50202)	Naringenin chalcone (5280960, HMDB0029631, CHEBI:15413)				15466559	network	details
human	Eubacterium ramulus (39490, gm0737)	Naringenin chalcone (5280960, HMDB0029631, CHEBI:15413)	Phloretin (4788, HMDB0003306, CHEBI:17276)				15466559	network	details
human	Eubacterium ramulus (39490, gm0737)	Phloretin (4788, HMDB0003306, CHEBI:17276)	Phloroglucinol (359, CHEBI:16204)				15466559	network	details
human	Eubacterium ramulus (39490, gm0737)	Phloretin (4788, HMDB0003306, CHEBI:17276)	3-(4-Hydroxyphenyl)propionic acid (10394, HMDB0002199, CHEBI:32980)				15466559	network	details
human	Eubacterium rectale (39491, gm0316)			DUOX2 (50506)	Reduced	low-throughput	31142855	network	details
human	Eubacterium rectale (39491, gm0316)			CXCL6 (6372)	Reduced	low-throughput	31142855	network	details
human	Eubacterium rectale (39491, gm0316)	Acetate (175, CHEBI:30089)	Butyrate (104775, CHEBI:17968)				22018234	network	details
human	Eubacterium sp. A-44 (394229, gm0715)	Ginsenoside Rg3 (9918693, HMDB0039546, CHEBI:67991)	Ginsenoside Rh2 (119307, CHEBI:77147)				11824558	network	details
human	Eubacterium sp. A-44 (394229, gm0715)	Ginsenoside Rh2 (119307, HMDB0039546, CHEBI:77147)	(20S)-Protopanaxadiol (11213350, CHEBI:75950)				11824558	network	details
human	Eubacterium sp. (142586, gm0880)	Secoisolariciresinol (65373, HMDB0013692, CHEBI:65004)	Enterodiol (115089, HMDB0005056, CHEBI:544560)				16765860	network	details
human	Faecalibacterium prausnitzii (853, gm0327)	Cholesterol (5997, HMDB0000067, CHEBI:1307929)	Bile acid (439520, CHEBI:22868)				31142855	network	details
human	Faecalibacterium prausnitzii (853, gm0327)			IL10 (3586)	Elevated	low-throughput	30765132	network	details
human	Faecalibacterium prausnitzii (853, gm0327)			IL12B (3593)	Reduced	low-throughput	30765132	network	details
human	Faecalibacterium prausnitzii (853, gm0327)			IL12A (3592)	Reduced	low-throughput	30765132	network	details
human	Faecalibacterium prausnitzii A2-165 (411483, gm0932)			CCR6 (1235)	Elevated	low-throughput	29981781	network	details
human	Faecalibacterium prausnitzii A2-165 (411483, gm0932)			CXCR6 (10663)	Elevated	low-throughput	29981781	network	details
human	Faecalibacterium prausnitzii A2-165 (411483, gm0932)			CXCR3 (2833)	Elevated	low-throughput	29981781	network	details
human	Faecalibacterium prausnitzii A2-165 (411483, gm0932)		Butyrate (104775, CHEBI:17968)				12324374	network	details
human	Faecalibacterium prausnitzii ATCC 27768T (gm0961)		Butyrate (104775, CHEBI:17968)				12508881	network	details
human	Faecalibacterium prausnitzii ATCC 27766 (gm0962)		Butyrate (104775, CHEBI:17968)				12508881	network	details
human	Faecalibacterium prausnitzii A2-165 (411483, gm0932)		Butyrate (104775, CHEBI:17968)				12508881	network	details
human	Faecalibacterium prausnitzii L2-6 (718252, gm0934)		Butyrate (104775, CHEBI:17968)				12508881	network	details
human	Faecalibacterium prausnitzii ATCC 27768T (gm0961)		D-Lactic acid (61503, HMDB0001311, CHEBI:42111)				12508881	network	details
human	Faecalibacterium prausnitzii ATCC 27766 (gm0962)		D-Lactic acid (61503, HMDB0001311, CHEBI:42111)				12508881	network	details
human	Faecalibacterium prausnitzii A2-165 (411483, gm0932)		D-Lactic acid (61503, HMDB0001311, CHEBI:42111)				12508881	network	details
human	Faecalibacterium prausnitzii L2-6 (718252, gm0934)		D-Lactic acid (61503, HMDB0001311, CHEBI:42111)				12508881	network	details
human	Faecalibacterium prausnitzii (853, gm0327)		3-Indolepropionic acid (3744, HMDB0002302, CHEBI:43580)				31030641	network	details
human	Faecalibacterium prausnitzii (853, gm0327)		Serine (5951, HMDB0000187, CHEBI:17115)				31235863	network	details
human	Faecalibacterium prausnitzii (853, gm0327)		Leucine (6106, HMDB0000687, CHEBI:15603)				31235863	network	details
human	Faecalibacterium prausnitzii (853, gm0327)		Malic acid (525, CHEBI:6650)				31235863	network	details
human	Faecalibacterium prausnitzii (853, gm0327)		2-Imino-1-methylimidazolidin-4-one (588, HMDB0000562, CHEBI:16737)				31235863	network	details
human	Faecalibacterium prausnitzii A2-165 (411483, gm0932)		Butyrate (104775, CHEBI:17968)	IL10 (3586)	Elevated	low-throughput	28713353	network	details
human	Faecalibacterium prausnitzii CNCM I-4543 (gm0979)		Butyrate (104775, CHEBI:17968)	IL10 (3586)	Elevated	low-throughput	28713353	network	details
human	Faecalibacterium prausnitzii L2-6 (718252, gm0934)		Butyrate (104775, CHEBI:17968)	IL10 (3586)	Elevated	low-throughput	28713353	network	details
human	Faecalibacterium prausnitzii CNCM I-4573 (gm0980)		Butyrate (104775, CHEBI:17968)	IL10 (3586)	Elevated	low-throughput	28713353	network	details
human	Faecalibacterium prausnitzii A2-165 (411483, gm0932)			CXCL8 (3576)	Reduced	low-throughput	28713353	network	details
human	Faecalibacterium prausnitzii L2-6 (718252, gm0934)			CXCL8 (3576)	Reduced	low-throughput	28713353	network	details
human	Faecalibacterium prausnitzii M 21/2 (gm0981)			CXCL8 (3576)	Reduced	low-throughput	28713353	network	details
human	Faecalibacterium prausnitzii CNCM I-4541 (gm0982)			CXCL8 (3576)	Reduced	low-throughput	28713353	network	details
human	Faecalibacterium prausnitzii CNCM I-4543 (gm0979)			CXCL8 (3576)	Reduced	low-throughput	28713353	network	details
human	Faecalibacterium prausnitzii CNCM I-4546 (gm0983)			CXCL8 (3576)	Reduced	low-throughput	28713353	network	details
human	Faecalibacterium prausnitzii CNCM I-4573 (gm0980)			CXCL8 (3576)	Reduced	low-throughput	28713353	network	details
human	Faecalibacterium prausnitzii CNCM I-4644 (gm0984)			CXCL8 (3576)	Reduced	low-throughput	28713353	network	details
human	Faecalibacterium prausnitzii CNCM I-4575 (gm0985)			CXCL8 (3576)	Reduced	low-throughput	28713353	network	details
human	Faecalibacterium prausnitzii A2-165 (411483, gm0932)		Butyrate (104775, CHEBI:17968)				22357539	network	details
human	Faecalibacterium prausnitzii (853, gm0327)			IL10 (3586)	Elevated	low-throughput	23643066	network	details
human	Faecalibacterium prausnitzii (853, gm0327)			TGFB1 (7040)	Elevated	low-throughput	23643066	network	details
human	Faecalibacterium prausnitzii (853, gm0327)			FOXP3 (50943)	Elevated	low-throughput	23643066	network	details
human	Faecalibacterium prausnitzii (853, gm0327)			NFKB1 (4790)	Reduced	low-throughput	20876719	network	details
human	Faecalibacterium prausnitzii (853, gm0327)			IL12A (3592)	Reduced	low-throughput	20876719	network	details
human	Faecalibacterium prausnitzii (853, gm0327)			IL12B (3593)	Reduced	low-throughput	20876719	network	details
human	Faecalibacterium prausnitzii (853, gm0327)			IL10 (3586)	Elevated	low-throughput	20876719	network	details
human	Faecalibacterium prausnitzii A2-165 (411483, gm0932)		Palmitic acid (985, HMDB0000220, CHEBI:15756)				25900655	network	details
human	Faecalibacterium prausnitzii A2-165 (411483, gm0932)		Dihydrocaffeic acid (348154, HMDB0000423, CHEBI:48400)				25900655	network	details
human	Faecalibacterium prausnitzii A2-165 (411483, gm0932)		D-Glucuronic Acid (94715, HMDB0000127, CHEBI:42717)				25900655	network	details
human	Faecalibacterium prausnitzii A2-165 (411483, gm0932)			IL1A (3552)	Reduced	low-throughput	25900655	network	details
human	Faecalibacterium prausnitzii A2-165 (411483, gm0932)			IL2 (3558)	Reduced	low-throughput	25900655	network	details
human	Faecalibacterium prausnitzii A2-165 (411483, gm0932)			IL5 (3567)	Reduced	low-throughput	25900655	network	details
human	Faecalibacterium prausnitzii HTF-F (gm0935)			IL12A (3592)	Reduced	low-throughput	25910186	network	details
human	Faecalibacterium prausnitzii HTF-F (gm0935)			IL12B (3593)	Reduced	low-throughput	25910186	network	details
human	Faecalibacterium prausnitzii HTF-F (gm0935)			IL17A (3605)	Reduced	low-throughput	25910186	network	details
human	Faecalibacterium prausnitzii A2-165 (411483, gm0932)			CXCL8 (3576)	Reduced	low-throughput	25002542	network	details
human	Faecalibacterium prausnitzii A2-165 (411483, gm0932)			NFKB1 (4790)	Reduced	low-throughput	25002542	network	details
human	Faecalibacterium prausnitzii A2-165 (411483, gm0932)			IL10 (3586)	Elevated	low-throughput	25002542	network	details
human	Faecalibacterium prausnitzii A2–165 (411483, gm1066)			TLR2 (7097)	Elevated	low-throughput	29112296	network	details
human	Faecalibacterium prausnitzii A2–165 (411483, gm1066)			TLR6 (10333)	Elevated	low-throughput	29112296	network	details
human	Faecalibacterium prausnitzii A2–165 (411483, gm1066)			TLR4 (7099)	Reduced	low-throughput	29112296	network	details
human	Faecalibacterium prausnitzii (853, gm0327)	PhIP-N2-β-D-glucuronide	2-Amino-1-methyl-6-phenylimidazo[4,5-b]pyridine (1530, CHEBI:76290)				31096909	network	details
human	Faecalibacterium prausnitzii (853, gm0327)		Butyrate (104775, CHEBI:17968)	CXCL8 (3576)	Reduced	low-throughput	18936492	network	details
human	Faecalibacterium prausnitzii (853, gm0327)		Butyrate (104775, CHEBI:17968)	NFKB1 (4790)	Reduced	low-throughput	18936492	network	details
human	Faecalibacterium prausnitzii (853, gm0327)			IL12B (3593)	Reduced	low-throughput	18936492	network	details
human	Faecalibacterium prausnitzii (853, gm0327)			IFNG (3458)	Reduced	low-throughput	18936492	network	details
human	Faecalibacterium prausnitzii (853, gm0327)			IL10 (3586)	Elevated	low-throughput	18936492	network	details
human	Firmicutes (1239, gm0332)		Butyrate (104775, CHEBI:17968)	FOS (2353)	Elevated	low-throughput	23300800	network	details
human	Firmicutes (1239, gm0332)		Butyrate (104775, CHEBI:17968)	MAPK3 (5595)	Elevated	low-throughput	23300800	network	details
human	Firmicutes (1239, gm0332)		Butyrate (104775, CHEBI:17968)	MAPK1 (5594)	Elevated	low-throughput	23300800	network	details
human	Firmicutes (1239, gm0332)		Butyrate (104775, CHEBI:17968)	JUN (3725)	Elevated	low-throughput	23300800	network	details
human	Firmicutes (1239, gm0332)			TLR2 (7097)	Elevated	low-throughput	31677982	network	details
human	Fusobacteriia (203490, gm0343)		Butyrate (104775, CHEBI:17968)	FOS (2353)	Elevated	low-throughput	23300800	network	details
human	Fusobacteriia (203490, gm0343)		Butyrate (104775, CHEBI:17968)	MAPK3 (5595)	Elevated	low-throughput	23300800	network	details
human	Fusobacteriia (203490, gm0343)		Butyrate (104775, CHEBI:17968)	MAPK1 (5594)	Elevated	low-throughput	23300800	network	details
human	Fusobacteriia (203490, gm0343)		Butyrate (104775, CHEBI:17968)	JUN (3725)	Elevated	low-throughput	23300800	network	details
human	Haemophilus parainfluenzae (729, gm0358)	Cholesterol (5997, HMDB0000067, CHEBI:1307929)	(4S)-4-[(2E)-Oct-2-enoyloxy]-4-(trimethylazaniumyl)butanoate (53481667, CHEBI:176711)	ANXA10 (11199)	Elevated	low-throughput	31142855	network	details
human	Haemophilus parainfluenzae (729, gm0358)	Cholesterol (5997, HMDB0000067, CHEBI:1307929)	Bile acid (439520, CHEBI:22868)	ANXA10 (11199)	Elevated	low-throughput	31142855	network	details
human	Haemophilus parainfluenzae (729, gm0358)	Cholesterol (5997, HMDB0000067, CHEBI:1307929)	Propionate (104745, CHEBI:17272)	ANXA10 (11199)	Elevated	low-throughput	31142855	network	details
human	Lactobacillus casei Shirota (gm0953)		Pipecolic acid (849, HMDB0000070, CHEBI:17964)				30846982	network	details
human	Lactobacillus (1578, gm0393)		Trimethylamine oxide (1145, HMDB0000925, CHEBI:15724)				30469463	network	details
human	Lactobacillus (1578, gm0393)		Creatine (586, HMDB0000064, CHEBI:16919)				31235863	network	details
human	Lactobacillus (1578, gm0393)			IL22 (50616)	Elevated	low-throughput	27158904	network	details
human	Lactobacillus (1578, gm0393)			MAPK14 (1432)	Elevated	low-throughput	27158904	network	details
human	Lactobacillus (1578, gm0393)	Tryptophan (6305, CHEBI:16828)	Indole-3-carboxaldehyde (10256, HMDB0029737, CHEBI:28238)	IL22 (50616)	Elevated	low-throughput	28658542	network	details
human	Lactobacillus acidophilus ATCC 4357 (gm1148)			FOS (2353)	Elevated	low-throughput	26867563	network	details
human	Lactobacillus acidophilus ATCC 4357 (gm1148)			JUN (3725)	Elevated	low-throughput	26867563	network	details
human	Lactobacillus acidophilus ATCC 4357 (gm1148)			PGP (283871)	Elevated	low-throughput	26867563	network	details
human	Lactobacillus acidophilus 4357 (gm1155)			SLC9A3 (6550)	Elevated	low-throughput	23086913	network	details
human	Lactobacillus acidophilus ATCC 4357 (gm1148)			RELA (5970)	Reduced	low-throughput	24130731	network	details
human	Lactobacillus acidophilus ATCC 4357 (gm1148)			CXCL8 (3576)	Reduced	low-throughput	24130731	network	details
human	Lactobacillus acidophilus ATCC 4357 (gm1148)			BCL10 (8915)	Reduced	low-throughput	24130731	network	details
human	Lactobacillus acidophilus ATCC 4357 (gm1148)			SLC26A3 (1811)	Elevated	low-throughput	25059823	network	details
human	Lactobacillus fermentum ACA-DC 179 (gm1059)			IL10 (3586)	Elevated	low-throughput	18077037	network	details
human	Lactobacillus fermentum ACA-DC 179 (gm1059)			TNF (7124)	Elevated	low-throughput	18077037	network	details
human	Lactobacillus fermentum (1613, gm0398)	D-Glucose (5793, HMDB0000122, CHEBI:4167)	Ethanol (702, HMDB0000108, CHEBI:16236)				26858714	network	details
human	Lactobacillus mucosae EPI2 (gm0947)	Daidzein (5281708, HMDB0003312, CHEBI:28197)	Dihydrodaidzein (176907, HMDB0005760, CHEBI:75842)				15578160	network	details
human	Lactobacillus mucosae EPI2 (gm0947)	Daidzein (5281708, HMDB0003312, CHEBI:28197)	O-Desmethylangolensin (89472, HMDB0004629, CHEBI:88902)				15578160	network	details
human	Lactobacillus mucosae (97478, gm0403)		Dihydrocaffeic acid (348154, HMDB0000423, CHEBI:48400)				31235863	network	details
human	Lactobacillus paracasei (1597, gm0766)	Linoleic acid (5280450, HMDB0000673, CHEBI:17351)	10-Keto-12Z-octadecenoic acid (24970825)	PPARG (5468)	Elevated	low-throughput	25749343	network	details
human	Lactobacillus paracasei JS1 (gm1077)	Isoflavone (72304, CHEBI:18220)	Equol (91469, HMDB0002209, CHEBI:428126)	PTGS2 (5743)	Reduced	low-throughput	30767231	network	details
human	Lactobacillus paracasei JS1 (gm1077)	Isoflavone (72304, CHEBI:18220)	Equol (91469, HMDB0002209, CHEBI:428126)	IL18 (3606)	Reduced	low-throughput	30767231	network	details
human	Lactobacillus paracasei JS1 (gm1077)	Isoflavone (72304, CHEBI:18220)	Equol (91469, HMDB0002209, CHEBI:428126)	TNF (7124)	Reduced	low-throughput	30767231	network	details
human	Lactobacillus paracasei JS1 (gm1077)	Isoflavone (72304, CHEBI:18220)	Equol (91469, HMDB0002209, CHEBI:428126)	IL1B (3553)	Reduced	low-throughput	30767231	network	details
human	Lactobacillus paracasei JS1 (gm1077)	Isoflavone (72304, CHEBI:18220)	Equol (91469, HMDB0002209, CHEBI:428126)	IL4 (3565)	Reduced	low-throughput	30767231	network	details
human	Lactobacillus paracasei JS1 (gm1077)	Isoflavone (72304, CHEBI:18220)	Equol (91469, HMDB0002209, CHEBI:428126)	IL6 (3569)	Reduced	low-throughput	30767231	network	details
human	Lactobacillus plantarum (1590, gm0405)			OCLN (100506658)	Elevated	low-throughput	20412608	network	details
human	Lactobacillus plantarum (1590, gm0405)			TJP1 (7082)	Elevated	low-throughput	20412608	network	details
human	Lactobacillus plantarum (1590, gm0405)			CLDN1 (9076)	Elevated	low-throughput	20412608	network	details
human	Lactobacillus plantarum (1590, gm0405)			CLDN4 (1364)	Elevated	low-throughput	20412608	network	details
human	Lactobacillus plantarum (1590, gm0405)			F11R (50848)	Elevated	low-throughput	20412608	network	details
human	Lactobacillus plantarum MB452 (gm1053)			OCLN (100506658)	Elevated	low-throughput	21143932	network	details
human	Lactobacillus plantarum MB452 (gm1053)			CGN (57530)	Elevated	low-throughput	21143932	network	details
human	Lactobacillus plantarum MB452 (gm1053)			TJP1 (7082)	Elevated	low-throughput	21143932	network	details
human	Lactobacillus plantarum MB452 (gm1053)			TJP2 (9414)	Elevated	low-throughput	21143932	network	details
human	Lactobacillus plantarum MB452 (gm1053)			GJC1 (10052)	Reduced	low-throughput	21143932	network	details
human	Lactobacillus plantarum 299v (gm1057)			LEP (3952)	Reduced	low-throughput	27505423	network	details
human	Lactobacillus plantarum ACA-DC 287 (gm1060)			IL10 (3586)	Elevated	low-throughput	18077037	network	details
human	Lactobacillus plantarum ACA-DC 287 (gm1060)			IL12B (3593)	Elevated	low-throughput	18077037	network	details
human	Lactobacillus plantarum ACA-DC 287 (gm1060)			IFNG (3458)	Elevated	low-throughput	18077037	network	details
human	Lactobacillus plantarum ACA-DC 287 (gm1060)			TNF (7124)	Elevated	low-throughput	18077037	network	details
human	Lactobacillus plantarum IFPL935 (gm1067)	(-)-Epigallocatechin gallate (65064, HMDB0003153, CHEBI:4806)	5-(3,4-Dihydroxyphenyl)-valerolactone (45093073)				22646528	network	details
human	Lactobacillus plantarum IFPL935 (gm1067)	(-)-Epigallocatechin gallate (65064, HMDB0003153, CHEBI:4806)	4-Hydroxy-(3',4'-dihydroxyphenyl)-valeric acid (52920332, HMDB0041679, CHEBI:137478)				22646528	network	details
human	Lactobacillus plantarum (1590, gm0405)			CLDN1 (9076)	Reduced	low-throughput	19331693	network	details
human	Lactobacillus plantarum (1590, gm0405)			OCLN (100506658)	Reduced	low-throughput	19331693	network	details
human	Lactobacillus plantarum (1590, gm0405)			F11R (50848)	Reduced	low-throughput	19331693	network	details
human	Lactobacillus plantarum (1590, gm0405)			TJP1 (7082)	Reduced	low-throughput	19331693	network	details
human	Lactobacillus plantarum (1590, gm0405)	Linoleic Acid (5280450, HMDB0000673, CHEBI:17351)	10-Oxo-11-octadecenoic acid (10308378)	NFE2L2 (4780)	Elevated	low-throughput	26879219	network	details
human	Lactobacillus plantarum (1590, gm0405)	Linoleic Acid (5280450, HMDB0000673, CHEBI:17351)	10-Oxo-11-octadecenoic acid (10308378)	HMOX1 (3162)	Elevated	low-throughput	26879219	network	details
human	Lactobacillus plantarum (1590, gm0405)			SLC5A8 (160728)	Elevated	low-throughput	20671196	network	details
human	Lactobacillus plantarum L9 (gm1147)			TNF (7124)	Reduced	low-throughput	28441885	network	details
human	Lactobacillus plantarum L9 (gm1147)			CXCL8 (3576)	Reduced	low-throughput	28441885	network	details
human	Lactobacillus reuteri (1598, gm0407)	2-Amino-1-methyl-6-phenylimidazo[4,5-b]pyridine (1530, CHEBI:76290)	7-Hydroxy-5-methyl-3-phenyl-6,7,8,9-tetrahydropyrido[3',2':4,5]imidazo[1,2-a]pyrimidin-5-ium chloride (129849310)				31096909	network	details
human	Lactobacillus rhamnosus (47715, gm0408)			TJP1 (7082)	Elevated	low-throughput	31732863	network	details
human	Lactobacillus rhamnosus (47715, gm0408)			CLDN1 (9076)	Elevated	low-throughput	31732863	network	details
human	Lactobacillus rhamnosus (47715, gm0408)			OCLN (100506658)	Elevated	low-throughput	31732863	network	details
human	Lactobacillus rhamnosus (47715, gm0408)			CGN (57530)	Elevated	low-throughput	31732863	network	details
human	Lactobacillus rhamnosus (47715, gm0408)			DEFB4A (1673)	Reduced	low-throughput	31732863	network	details
human	Lactobacillus rhamnosus GG (568703, gm0743)			TLR4 (7099)	Reduced	low-throughput	22476320	network	details
human	Lactobacillus rhamnosus GG (568703, gm0743)			MAPK14 (1432)	Reduced	low-throughput	22476320	network	details
human	Lactobacillus rhamnosus GG (568703, gm0743)			IKBKE (9641)	Reduced	low-throughput	22476320	network	details
human	Lactobacillus rhamnosus GG (568703, gm0743)			MIR146A (406938)	Reduced	low-throughput	22476320	network	details
human	Lactobacillus rhamnosus GG (568703, gm0743)			MIR155 (406947)	Elevated	low-throughput	22476320	network	details
human	Lactobacillus rhamnosus GG (568703, gm0743)			CXCL8 (3576)	Reduced	low-throughput	21178864	network	details
human	Lactobacillus ruminis (1623, gm0830)		Glycine (750, HMDB0000123, CHEBI:15428)				31235863	network	details
human	Lactobacillus ruminis (1623, gm0830)		Creatine (586, HMDB0000064, CHEBI:16919)				31235863	network	details
human	Lactobacillus zeae (57037, gm0414)		Dihydrocaffeic acid (348154, HMDB0000423, CHEBI:48400)				31235863	network	details
human	Lactococcus sp. 20-92 (gm1068)	Daidzein (5281708, HMDB0003312, CHEBI:28197)	Equol (91469, HMDB0002209, CHEBI:428126)				20639368	network	details
human	Lactococcus sp. 20-92 (gm1068)	Daidzein (5281708, HMDB0003312, CHEBI:28197)	Dihydrodaidzein (176907, HMDB0005760, CHEBI:75842)				20639368	network	details
human	Lawsonibacter asaccharolyticus 3BBH22T (gm1157)		Acetate (175, CHEBI:30089)				29745868	network	details
human	Lawsonibacter asaccharolyticus 3BBH22T (gm1157)		Butyrate (104775, CHEBI:17968)				29745868	network	details
human	Parasutterella excrementihominis YIT 11859(T) (gm1134)		Propionate (104745, CHEBI:17272)				19542131	network	details
human	Phascolarctobacterium succinatutens YIT 12067T (gm0968)	Succinate (160419, CHEBI:30031)	Propionate (104745, CHEBI:17272)				22081579	network	details
human	Phascolarctobacterium succinatutens YIT 12068T (gm0969)	Succinate (160419, CHEBI:30031)	Propionate (104745, CHEBI:17272)				22081579	network	details
human	Propionibacterium avidum (33010, gm0857)		Propionate (104745, CHEBI:17272)				28894218	network	details
human	Prevotellaceae (171552, gm0540)		Succinate (160419, CHEBI:30031)				29434314	network	details
human	Prevotella copri (165179, gm0536)		Butyrate (104775, CHEBI:17968)	PLIN2 (123)	Elevated	low-throughput	28266623	network	details
human	Prevotella copri (165179, gm0536)		Butyrate (104775, CHEBI:17968)	ANGPTL4 (51129)	Elevated	low-throughput	28266623	network	details
human	Roseburia (841, gm0571)		3-Phenylpropionic acid (107, HMDB0000764, CHEBI:28631)				31235863	network	details
human	Roseburia inulinivorans A2–194(F) (gm1116)	L-Fucose (17106, HMDB0000174, CHEBI:2181)	Propionate (104745, CHEBI:17272)				16740940	network	details
human	Roseburia inulinivorans A2–194(F) (gm1116)	L-Fucose (17106, HMDB0000174, CHEBI:2181)	Propanol (1031, CHEBI:28831)				16740940	network	details
human	Roseburia inulinivorans A2–194(F) (gm1116)	L-Fucose (17106, HMDB0000174, CHEBI:2181)	Butyrate (104775, CHEBI:17968)				16740940	network	details
human	Roseburia sp. A2-181 (gm0956)		Butyrate (104775, CHEBI:17968)				12324374	network	details
human	Roseburia sp. A2-183 (180589, gm0957)		Butyrate (104775, CHEBI:17968)				12324374	network	details
human	Ruminococcaceae (541000, gm0581)		3-Indolepropionic acid (3744, HMDB0002302, CHEBI:43580)				31030641	network	details
human	Ruminococcus (1263, gm0587)		Alanine (5950, HMDB0062251, CHEBI:16977)				31235863	network	details
human	Ruminococcus (1263, gm0587)		Leucine (6106, HMDB0000687, CHEBI:15603)				31235863	network	details
human	Ruminococcus (1263, gm0587)		l-Isoleucine (6306, HMDB0000172, CHEBI:17191)				31235863	network	details
human	Ruminococcus (1263, gm0587)		Glycine (750, HMDB0000123, CHEBI:15428)				31235863	network	details
human	Ruminococcus (1263, gm0587)		Proline (145742, HMDB0000162, CHEBI:17203)				31235863	network	details
human	Ruminococcus (1263, gm0587)		Serine (5951, HMDB0000187, CHEBI:17115)				31235863	network	details
human	Ruminococcus (1263, gm0587)		Ursodeoxycholic acid (31401, HMDB0000946, CHEBI:9907)				28587349	network	details
human	Ruminococcus (1263, gm0587)		Glycerophospholipids (CHEBI:37739)				31748797	network	details
human	Ruminococcus bromii (40518, gm0588)		Tartaric acid (875, HMDB0062642, CHEBI:15674)				31235863	network	details
human	Ruminococcus bromii (40518, gm0588)		4-Pyridoxic acid (6723, HMDB0000017, CHEBI:17405)				31235863	network	details
human	Ruminococcus bromii (40518, gm0588)	Phytoestrogens (56842207)	Propionate (104745, CHEBI:17272)				25988339	network	details
human	Ruminococcus bromii (40518, gm0588)	Phytoestrogens (56842207)	Glycerol (753, HMDB0000131, CHEBI:17754)				25988339	network	details
human	Ruminococcus champanellensis 18P13(T) (gm1156)	D-(+)-Cellobiose (10712, CHEBI:36217)	Acetate (175, CHEBI:30089)				21357460	network	details
human	Ruminococcus champanellensis 18P13(T) (gm1156)	D-(+)-Cellobiose (10712, CHEBI:36217)	Succinate (160419, CHEBI:30031)				21357460	network	details
human	Ruminococcus flavefaciens (1265, gm0590)		Glycocholic acid (10140, HMDB0000138, CHEBI:17687)				31235863	network	details
human	Ruminococcus gnavus (33038, gm0592)		beta-D-Fructofuranose (439709, CHEBI:28645)				25653214	network	details
human	Ruminococcus gnavus E1 (935582, gm1146)			MUC1 (4582)	Elevated	low-throughput	26868655	network	details
human	Ruminococcus gnavus E1 (935582, gm1146)			MUC2 (4583)	Elevated	low-throughput	26868655	network	details
human	Ruminococcus gnavus E1 (935582, gm1146)			MGAT3 (4248)	Elevated	low-throughput	26868655	network	details
human	Ruminococcus gnavus E1 (935582, gm1146)			B4GALT1 (2683)	Elevated	low-throughput	26868655	network	details
human	Ruminococcus gnavus E1 (935582, gm1146)			ST6GAL1 (6480)	Elevated	low-throughput	26868655	network	details
human	Succinivibrio dextrinosolvens (83771, gm0755)	D-Glucose (5793, HMDB0000122, CHEBI:4167)	Acetate (175, CHEBI:30089)				8481001	network	details
human	Succinivibrio dextrinosolvens (83771, gm0755)	D-Glucose (5793, HMDB0000122, CHEBI:4167)	Succinate (160419, CHEBI:30031)				8481001	network	details
human	Succinivibrio dextrinosolvens (83771, gm0755)	D-Glucose (5793, HMDB0000122, CHEBI:4167)	Formate (283, CHEBI:15740)				8481001	network	details
human	Succinivibrio dextrinosolvens (83771, gm0755)	D-Glucose (5793, HMDB0000122, CHEBI:4167)	Lactate (91435, CHEBI:24996)				8481001	network	details
human	Veillonella (29465, gm0676)		Propionate (104745, CHEBI:17272)				30359203	network	details
human	Veillonella ratti (103892, gm0697)		Propionate (104745, CHEBI:17272)				28894218	network	details
human	Veillonella sp. 32 (gm1073)	Rutin (5280805, HMDB0003249, CHEBI:28527)	Leucocianidol (71629, CHEBI:15758)				22583754	network	details
human	Veillonella sp. EP (1926307, gm1180)	Daidzein (5281708, HMDB0003312, CHEBI:28197)	Equol (91469, HMDB0002209, CHEBI:428126)				19580283	network	details
human	Veillonellaceae (31977, gm0680)		Succinate (160419, CHEBI:30031)				29434314	network	details

## Sheet: Total microbes sp.
Gut Microbiota (ID)
Bacillus sp.46 (1266601, gm1018)
Bacillus sp. 52 (gm1070)
Bacillus sp. 46 (1266601, gm1132)
Bacteroides (816, gm0077)
Bacteroides caccae (47678, gm0079)
Bacteroides distasonis (823, gm0818)
Bacteroides fragilis (817, gm0082)
Bacteroides fragilis ATCC 23745 (gm1123)
Bacteroides fragilis SDG-Mt85-5B (817, gm1170)
Bacteroides fragilis SDG-Mt85-4C (817, gm1171)
Bacteroides fragilis DIfE-05 (817, gm1172)
Bacteroides ovatus (28116, gm0084)
Bacteroides ovatus SDG-Mt85-3C (28116, gm1174)
Bacteroides sp. 45 (gm1056)
Bacteroides sp. MANG (298389, gm1069)
Bacteroides sp. 45 (gm1056)
Bacteroides sp. 42 (gm1071)
Bacteroides sp. 22 (gm1072)
Bacteroides stercoris HJ-15 (gm1113)
Bacteroides stercoris (46506, gm0717)
Bacteroides thetaiotaomicron VPI-5482 (226186, gm1036)
Bacteroides thetaiotaomicron (818, gm0087)
Bacteroides uniformis (820, gm0088)
Bacteroides uniformis (820, gm0088)
Bacteroides vulgatus (821, gm0089)
Bacteroides vulgatus (821, gm0089)
Bacteroidetes (976, gm0090)
Bifidobacterium (1678, gm0105)
Bifidobacterium adolescentis B7304 (gm1102)
Bifidobacterium pseudocatenulatum B7003 (gm1100)
Bifidobacterium adolescentis MB 114 (gm0994)
Bifidobacterium adolescentis (1680, gm0106)
Bifidobacterium adolescentis B7304 (gm1102)
Bifidobacterium animalis (28025, gm0107)
Bifidobacterium animalis subsp. lactis BB-12 (552531, gm1121)
Bifidobacterium bifidum MB 254 (gm0997)
Bifidobacterium bifidum (1681, gm0108)
Bifidobacterium breve MB 234 (gm0998)
Bifidobacterium breve MB 235 (gm0999)
Bifidobacterium breve B7824 (gm1104)
Bifidobacterium catenulatum subsp. kashiwanohense APCKJ1 (gm1078)
Bifidobacterium dentium ATCC 27678 (473819, gm0952)
Bifidobacterium dentium (1689, gm0111)
Bifidobacterium infantis MB 208 (gm1000)
Bifidobacterium lactis MB 238 (gm1001)
Bifidobacterium longum (216816, gm0112)
Bifidobacterium longum IPLA E44 (gm0993)
Bifidobacterium longum MB 201 (gm1002)
Bifidobacterium longum MB 207 (gm1003)
Bifidobacterium longum MB 219 (gm1004)
Bifidobacterium longum (216816, gm0112)
Bifidobacterium longum HY8001 (gm1074)
Bifidobacterium longum H-1 (gm1098)
Bifidobacterium longum subsp. infantis B7875 (gm1101)
Bifidobacterium longum subsp. infantis ATCC 15697 = JCM 1222 = DSM 20088 (391904, gm0910)
Bifidobacterium pseudocatenulatum WC 0400 (gm0987)
Bifidobacterium pseudocatenulatum WC 0401 (gm0988)
Bifidobacterium pseudocatenulatum WC 0403 (gm0989)
Bifidobacterium pseudocatenulatum WC 0407 (gm0990)
Bifidobacterium pseudocatenulatum WC 0408 (gm0991)
Bifidobacterium pseudocatenulatum MB 264 (gm1005)
Blautia (572511, gm0117)
Blautia faecis M25(T) (gm1152)
Blautia obeum (40520, gm0822)
Blautia producta (33035, gm1176)
Blautia producta SNU-Julong 732 (33035, gm1179)
Blautia sp. MRG-PMF1 (gm1029)
Blautia sp. AUH-JLD56 (gm1114)
Butyricicoccus pullicaecorum (501571, gm0135)
Butyricimonas synergistica MT01(T) (gm1136)
Butyricimonas virosa MT12(T) (gm1135)
Clostridium (1485, gm0187)
Clostridium asparagiforme DSM 15981 (518636, gm1010)
Clostridium butyricum ATCC 19398 (1492, gm1099)
Clostridium cadaveris BB88A (gm1108)
Clostridium cadaveris CC44 001G (1073356, gm1109)
Clostridium cadaveris CC40 001C (1073356, gm1110)
Clostridium orbiscindens I1 (gm0897)
Clostridium orbiscindens I2 (gm0965)
Clostridium pasteurianum (1501, gm0817)
Clostridium scindens VPI 12708 (29347, gm0885)
Clostridium scindens ATCC35704 (411468, gm1076)
Clostridium scindens ATCC 35704 (411468, gm1133)
Clostridium scindens (29347, gm0208)
Clostridium sp. TM-40 (371143, gm0893)
Clostridium sp. L2-50 (411489, gm0958)
Clostridium sp. HGH6 (gm1064)
Clostridium sp. HGH136 (gm1079)
Clostridium sp. (1506, gm0210)
Clostridium sp. HGH136 (gm1140)
Clostridium sp. SDG-Mt85-3Db (1506, gm1169)
Clostridium sporogenes ATCC15579 (gm1037)
Clostridium sporogenes Ll.LtrB-eryR ΩfldC (gm1038)
Clostridium sporogenes ATCC 15579 (471871, gm1012)
Clostridium tyrobutyricum (1519, gm0693)
Eubacterium (1730, gm0309)
Eubacterium dolichum (1263076, gm0311)
Eubacterium hallii (39488, gm0314)
Eubacterium limosum (1736, gm0315)
Eubacterium limosum ATCC 8486 (gm1065)
Eubacterium limosum (1736, gm0315)
Eubacterium ramulus ATTC 29099 (gm0891)
Eubacterium ramulus DSM 16296 (gm0898)
Eubacterium ramulus (39490, gm0737)
Eubacterium rectale (39491, gm0316)
Eubacterium sp. A-44 (394229, gm0715)
Eubacterium sp. (142586, gm0880)
Faecalibacterium prausnitzii (853, gm0327)
Faecalibacterium prausnitzii A2-165 (411483, gm0932)
Faecalibacterium prausnitzii ATCC 27768T (gm0961)
Faecalibacterium prausnitzii ATCC 27766 (gm0962)
Faecalibacterium prausnitzii A2-165 (411483, gm0932)
Faecalibacterium prausnitzii L2-6 (718252, gm0934)
Faecalibacterium prausnitzii ATCC 27768T (gm0961)
Faecalibacterium prausnitzii ATCC 27766 (gm0962)
Faecalibacterium prausnitzii (853, gm0327)
Faecalibacterium prausnitzii CNCM I-4543 (gm0979)
Faecalibacterium prausnitzii CNCM I-4573 (gm0980)
Faecalibacterium prausnitzii M 21/2 (gm0981)
Faecalibacterium prausnitzii CNCM I-4541 (gm0982)
Faecalibacterium prausnitzii CNCM I-4543 (gm0979)
Faecalibacterium prausnitzii CNCM I-4546 (gm0983)
Faecalibacterium prausnitzii CNCM I-4573 (gm0980)
Faecalibacterium prausnitzii CNCM I-4644 (gm0984)
Faecalibacterium prausnitzii CNCM I-4575 (gm0985)
Faecalibacterium prausnitzii HTF-F (gm0935)
Firmicutes (1239, gm0332)
Fusobacteriia (203490, gm0343)
Haemophilus parainfluenzae (729, gm0358)
Lactobacillus casei Shirota (gm0953)
Lactobacillus (1578, gm0393)
Lactobacillus acidophilus ATCC 4357 (gm1148)
Lactobacillus acidophilus 4357 (gm1155)
Lactobacillus acidophilus ATCC 4357 (gm1148)
Lactobacillus fermentum ACA-DC 179 (gm1059)
Lactobacillus fermentum (1613, gm0398)
Lactobacillus mucosae EPI2 (gm0947)
Lactobacillus mucosae (97478, gm0403)
Lactobacillus paracasei (1597, gm0766)
Lactobacillus paracasei JS1 (gm1077)
Lactobacillus plantarum (1590, gm0405)
Lactobacillus plantarum MB452 (gm1053)
Lactobacillus plantarum 299v (gm1057)
Lactobacillus plantarum ACA-DC 287 (gm1060)
Lactobacillus plantarum IFPL935 (gm1067)
Lactobacillus plantarum (1590, gm0405)
Lactobacillus plantarum L9 (gm1147)
Lactobacillus reuteri (1598, gm0407)
Lactobacillus rhamnosus (47715, gm0408)
Lactobacillus rhamnosus GG (568703, gm0743)
Lactobacillus ruminis (1623, gm0830)
Lactobacillus zeae (57037, gm0414)
Lactococcus sp. 20-92 (gm1068)
Lawsonibacter asaccharolyticus 3BBH22T (gm1157)
Parasutterella excrementihominis YIT 11859(T) (gm1134)
Phascolarctobacterium succinatutens YIT 12067T (gm0968)
Phascolarctobacterium succinatutens YIT 12068T (gm0969)
Propionibacterium avidum (33010, gm0857)
Prevotellaceae (171552, gm0540)
Prevotella copri (165179, gm0536)
Roseburia (841, gm0571)
Roseburia inulinivorans A2–194(F) (gm1116)
Roseburia sp. A2-181 (gm0956)
Roseburia sp. A2-183 (180589, gm0957)
Ruminococcaceae (541000, gm0581)
Ruminococcus (1263, gm0587)
Ruminococcus bromii (40518, gm0588)
Ruminococcus champanellensis 18P13(T) (gm1156)
Ruminococcus flavefaciens (1265, gm0590)
Ruminococcus gnavus (33038, gm0592)
Ruminococcus gnavus E1 (935582, gm1146)
Succinivibrio dextrinosolvens (83771, gm0755)
Veillonella (29465, gm0676)
Veillonella ratti (103892, gm0697)
Veillonella sp. 32 (gm1073)
Veillonella sp. EP (1926307, gm1180)
Veillonellaceae (31977, gm0680)

## Sheet: metabolites and gene ID
Human / Mouse	Gut Microbiota (ID)	Substrate (ID)	Metabolite (ID)	Gene (ID)
human	Eubacterium sp. A-44 (394229, gm0715)	Ginsenoside Rh2 (119307, HMDB0039546, CHEBI:77147)	(20S)-Protopanaxadiol (11213350, CHEBI:75950)
human	Haemophilus parainfluenzae (729, gm0358)	Cholesterol (5997, HMDB0000067, CHEBI:1307929)	(4S)-4-[(2E)-Oct-2-enoyloxy]-4-(trimethylazaniumyl)butanoate (53481667, CHEBI:176711)	ANXA10 (11199)
human	Bacteroides caccae (47678, gm0079)		(R)-3-(4-Hydroxyphenyl)lactate (9548632, CHEBI:10980)
human	Clostridium sp. (1506, gm0210)		(R)-3-(4-Hydroxyphenyl)lactate (9548632, CHEBI:10980)
human	Lactobacillus paracasei (1597, gm0766)	Linoleic acid (5280450, HMDB0000673, CHEBI:17351)	10-Keto-12Z-octadecenoic acid (24970825)	PPARG (5468)
human	Lactobacillus plantarum (1590, gm0405)	Linoleic Acid (5280450, HMDB0000673, CHEBI:17351)	10-Oxo-11-octadecenoic acid (10308378)	NFE2L2 (4780)
human	Lactobacillus plantarum (1590, gm0405)	Linoleic Acid (5280450, HMDB0000673, CHEBI:17351)	10-Oxo-11-octadecenoic acid (10308378)	HMOX1 (3162)
human	Bacillus sp. 46 (1266601, gm1132)	Avicularin (5490064, HMDB0030860, CHEBI:65460)	11-Methoxycurvularin (10381440)
human	Eubacterium ramulus (39490, gm0737)	Genistein 7-O-glucoside (44257273)	2-(4-Hydroxyphenyl)propionic acid, (2S)- (6971268)
human	Eubacterium ramulus (39490, gm0737)	Genistein (5280961, HMDB0003217, CHEBI:28088)	2-(4-Hydroxyphenyl)propionic acid, (2S)- (6971268)
human	Blautia producta (33035, gm1176)	Matairesinol (119205, HMDB0035698, CHEBI:6698)	2,3-Bis(3,4-dihydroxybenzyl)butyrolactone (500189)
human	Bifidobacterium (1678, gm0105)	Chlorogenic acid (1794427, HMDB0003164, CHEBI:16112)	2,3-Dihydroxypropyl (E)-3-(3,4-dihydroxyphenyl)prop-2-enoate (5315606)
human	Clostridium sp. HGH6 (gm1064)	Daidzein (5281708, HMDB0003312, CHEBI:28197)	2,4-Dioxopentanedioic acid (444873, CHEBI:42056)
human	Bacteroides stercoris HJ-15 (gm1113)	(20R)-Ginsenoside Rg3 (46887680, CHEBI:67990)	20(R)-Ginsenoside Rh2 (54580480)
human	Faecalibacterium prausnitzii (853, gm0327)	PhIP-N2-β-D-glucuronide	2-Amino-1-methyl-6-phenylimidazo[4,5-b]pyridine (1530, CHEBI:76290)
human	Clostridium sporogenes Ll.LtrB-eryR ΩfldC (gm1038)	Tyrosine (6057, HMDB0000158, CHEBI:17895)	2-Hydroxy-3-(4-hydroxyphenyl)propanoic acid (9378, HMDB0000755, CHEBI:17385)
human	Clostridium sporogenes ATCC15579 (gm1037)	5-Hydroxytryptophan (144, CHEBI:28171)	2-Hydroxy-3-(5-hydroxy-1H-indol-3-yl)propanoic acid (192215)
human	Clostridium (1485, gm0187)		2-Imino-1-methylimidazolidin-4-one (588, HMDB0000562, CHEBI:16737)
human	Faecalibacterium prausnitzii (853, gm0327)		2-Imino-1-methylimidazolidin-4-one (588, HMDB0000562, CHEBI:16737)
human	Clostridium sporogenes Ll.LtrB-eryR ΩfldC (gm1038)	Levodopa (6047, HMDB0000181, CHEBI:15765)	3-(3,4-Dihydroxyphenyl)-2-hydroxypropanoic acid (439435, HMDB0003503, CHEBI:17807)
human	Bifidobacterium (1678, gm0105)	Chlorogenic acid (1794427, HMDB0003164, CHEBI:16112)	3-(3-Hydroxyphenyl)propanoic acid (91, HMDB0000375, CHEBI:1427)
human	Clostridium sporogenes ATCC 15579 (471871, gm1012)	Tyrosine (6057, CHEBI:17895)	3-(4-Hydroxyphenyl)propionic acid (10394, CHEBI:32980)
human	Clostridium orbiscindens I2 (gm0965)	Apigenin (5280443, HMDB0002124, CHEBI:18388)	3-(4-Hydroxyphenyl)propionic acid (10394, HMDB0002199, CHEBI:32980)
human	Clostridium orbiscindens I2 (gm0965)	5,7-Dihydroxy-2-(4-hydroxyphenyl)chroman-4-one (932, HMDB0128074, CHEBI:50202)	3-(4-Hydroxyphenyl)propionic acid (10394, HMDB0002199, CHEBI:32980)
human	Clostridium orbiscindens I2 (gm0965)	Phloretin (4788, HMDB0003306, CHEBI:17276)	3-(4-Hydroxyphenyl)propionic acid (10394, HMDB0002199, CHEBI:32980)
human	Eubacterium ramulus ATTC 29099 (gm0891)	Naringenin (439246, HMDB0128074, CHEBI:17846)	3-(4-Hydroxyphenyl)propionic acid (10394, HMDB0002199, CHEBI:32980)
human	Eubacterium ramulus (39490, gm0737)	Phloretin (4788, HMDB0003306, CHEBI:17276)	3-(4-Hydroxyphenyl)propionic acid (10394, HMDB0002199, CHEBI:32980)
human	Eubacterium ramulus (39490, gm0737)	Phloretin (4788, HMDB0003306, CHEBI:17276)	3-(4-Hydroxyphenyl)propionic acid (10394, HMDB0002199, CHEBI:32980)
human	Bacteroides sp. 45 (gm1056)	Quercitrin (5280459, HMDB0033751, CHEBI:17558)	3,4-Dihydroxybenzoic acid (72, CHEBI:36062)
human	Clostridium orbiscindens I2 (gm0965)	Taxifolin (439533, CHEBI:17948)	3,4-Dihydroxyphenylacetic acid (547, HMDB0001336, CHEBI:41941)
human	Clostridium orbiscindens I2 (gm0965)	Quercetin (5280343, HMDB0005794, CHEBI:16243)	3,4-Dihydroxyphenylacetic acid (547, HMDB0001336, CHEBI:41941)
human	Eubacterium ramulus ATTC 29099 (gm0891)	Isoquercitrin (5280804, HMDB0037362, CHEBI:68352)	3,4-Dihydroxyphenylacetic acid (547, HMDB0001336, CHEBI:41941)
human	Eubacterium ramulus ATTC 29099 (gm0891)	Taxifolin (439533, CHEBI:17948)	3,4-Dihydroxyphenylacetic acid (547, HMDB0001336, CHEBI:41941)
human	Eubacterium ramulus ATTC 29099 (gm0891)	Quercetin (5280343, HMDB0005794, CHEBI:16243)	3,4-Dihydroxyphenylacetic acid (547, HMDB0001336, CHEBI:41941)
human	Eubacterium ramulus (39490, gm0737)	Quercetin (5280343, HMDB0005794, CHEBI:16243)	3,4-Dihydroxyphenylacetic acid (547, HMDB0001336, CHEBI:41941)
human	Eubacterium ramulus (39490, gm0737)	Isoquercitrin (5280804, HMDB0037362, CHEBI:68352)	3,4-Dihydroxyphenylacetic acid (547, HMDB0001336, CHEBI:41941)
human	Eubacterium ramulus (39490, gm0737)	Isoquercitrin (5280804, HMDB0037362, CHEBI:68352)	3,4-Dihydroxyphenylacetic acid (547, HMDB0001336, CHEBI:41941)
human	Blautia sp. AUH-JLD56 (gm1114)	Arctigenin (64981, CHEBI:391051)	3'-desmethylarctigenin
human	Clostridium orbiscindens I1 (gm0897)	Hesperetin dihydrochalcone (147608, HMDB0128062)	3-Hydroxy-4-methoxybenzenepropanoic acid (2752054, HMDB0131138)
human	Eubacterium ramulus DSM 16296 (gm0898)	Hesperetin dihydrochalcone (147608, HMDB0128062)	3-Hydroxy-4-methoxybenzenepropanoic acid (2752054, HMDB0131138)
human	Eubacterium (1730, gm0309)		3-Hydroxybenzoic acid (7420, HMDB0002466, CHEBI:30764)
human	Bifidobacterium (1678, gm0105)	Chlorogenic acid (1794427, HMDB0003164, CHEBI:16112)	3-Hydroxyphenethyl alcohol (83404)
human	Clostridium cadaveris BB88A (gm1108)	Tryptophan (6305, CHEBI:16828)	3-Indolepropionic acid (3744, HMDB0002302, CHEBI:43580)	IL1B
human	Clostridium cadaveris CC44 001G (1073356, gm1109)	Tryptophan (6305, CHEBI:16828)	3-Indolepropionic acid (3744, HMDB0002302, CHEBI:43580)	IL2B
human	Clostridium cadaveris CC40 001C (1073356, gm1110)	Tryptophan (6305, CHEBI:16828)	3-Indolepropionic acid (3744, HMDB0002302, CHEBI:43580)	IL3B
human	Clostridium sporogenes ATCC 15579 (471871, gm1012)	Tryptophan (6305, CHEBI:16828)	3-Indolepropionic acid (3744, HMDB0002302, CHEBI:43580)	IL4B
human	Eubacterium (1730, gm0309)		3-Indolepropionic acid (3744, HMDB0002302, CHEBI:43580)	IL5B
human	Eubacterium dolichum (1263076, gm0311)		3-Indolepropionic acid (3744, HMDB0002302, CHEBI:43580)
human	Faecalibacterium prausnitzii (853, gm0327)		3-Indolepropionic acid (3744, HMDB0002302, CHEBI:43580)
human	Ruminococcaceae (541000, gm0581)		3-Indolepropionic acid (3744, HMDB0002302, CHEBI:43580)
human	Clostridium sporogenes ATCC 15579 (471871, gm1012)	Phenylalanine (6140, CHEBI:17295)	3-Phenylpropionic acid (107, CHEBI:28631)
human	Bacteroides fragilis (817, gm0082)		3-Phenylpropionic acid (107, HMDB0000764, CHEBI:28631)
human	Roseburia (841, gm0571)		3-Phenylpropionic acid (107, HMDB0000764, CHEBI:28631)
human	Lactobacillus plantarum IFPL935 (gm1067)	(-)-Epigallocatechin gallate (65064, HMDB0003153, CHEBI:4806)	4-Hydroxy-(3',4'-dihydroxyphenyl)-valeric acid (52920332, HMDB0041679, CHEBI:137478)
human	Eubacterium (1730, gm0309)		4-Hydroxybenzoic acid (135, HMDB0000500, CHEBI:30763)
human	Eubacterium ramulus ATTC 29099 (gm0891)	Kaempferol (5280863, HMDB0005801, CHEBI:28499)	4-Hydroxyphenylacetic acid (127, HMDB0000020, CHEBI:18101)
human	Bacteroides caccae (47678, gm0079)		4-Pyridoxic acid (6723, HMDB0000017, CHEBI:17405)
human	Ruminococcus bromii (40518, gm0588)		4-Pyridoxic acid (6723, HMDB0000017, CHEBI:17405)
human	Lactobacillus plantarum IFPL935 (gm1067)	(-)-Epigallocatechin gallate (65064, HMDB0003153, CHEBI:4806)	5-(3,4-Dihydroxyphenyl)-valerolactone (45093073)
human	Eubacterium limosum ATCC 8486 (gm1065)	Glycitein (5317750, HMDB0005781, CHEBI:542494)	6,7,4'-Trihydroxyisoflavone (5284649, HMDB0031715, CHEBI:74957)
human	Eubacterium limosum (1736, gm0315)	Glycitein (5317750, HMDB0005781, CHEBI:542494)	6,7,4'-Trihydroxyisoflavone (5284649, HMDB0031715, CHEBI:74957)
human	Eubacterium limosum (1736, gm0315)	Glycitein (5317750, HMDB0005781, CHEBI:542494)	6,7,4'-Trihydroxyisoflavone (5284649, HMDB0031715, CHEBI:74957)
human	Clostridium sp. HGH136 (gm1079)	Daidzein (5281708, HMDB0003312, CHEBI:28197)	6'-Hydroxy-O-desmethylangolensin (20601635, HMDB0041695, CHEBI:88662)
human	Blautia obeum (40520, gm0822)	2-Amino-1-methyl-6-phenylimidazo[4,5-b]pyridine (1530, CHEBI:76290)	7-Hydroxy-5-methyl-3-phenyl-6,7,8,9-tetrahydropyrido[3',2':4,5]imidazo[1,2-a]pyrimidin-5-ium chloride (129849310)
human	Lactobacillus reuteri (1598, gm0407)	2-Amino-1-methyl-6-phenylimidazo[4,5-b]pyridine (1530, CHEBI:76290)	7-Hydroxy-5-methyl-3-phenyl-6,7,8,9-tetrahydropyrido[3',2':4,5]imidazo[1,2-a]pyrimidin-5-ium chloride (129849310)
human	Eubacterium limosum (1736, gm0315)	Isoxanthohumol (513197, CHEBI:171798)	8-Prenylnaringenin (480764, CHEBI:50207)
human	Eubacterium limosum (1736, gm0315)	Isoxanthohumol (513197, CHEBI:171798)	8-Prenylnaringenin (480764, CHEBI:50207)
human	Bacteroides thetaiotaomicron VPI-5482 (226186, gm1036)	D-Glucose (5793, CHEBI:4167)	Acetate (175, CHEBI:30089)	ALPI
human	Bacteroidetes (976, gm0090)		Acetate (175, CHEBI:30089)	C5AR1
human	Bacteroidetes (976, gm0090)		Acetate (175, CHEBI:30089)	CXCR2
human	Bacteroidetes (976, gm0090)		Acetate (175, CHEBI:30089)	TNF
human	Bacteroidetes (976, gm0090)		Acetate (175, CHEBI:30089)	CCL3
human	Bacteroidetes (976, gm0090)		Acetate (175, CHEBI:30089)	C5AR1
human	Bacteroidetes (976, gm0090)		Acetate (175, CHEBI:30089)	CXCR2
human	Bacteroidetes (976, gm0090)		Acetate (175, CHEBI:30089)	TNF
human	Bacteroidetes (976, gm0090)		Acetate (175, CHEBI:30089)	CCL3
human	Bifidobacterium dentium ATCC 27678 (473819, gm0952)		Acetate (175, CHEBI:30089)	Htr1a
human	Bifidobacterium longum (216816, gm0112)	Xyloglucan Heptasaccharide (44630346, HMDB0006611)	Acetate (175, CHEBI:30089)	DCLK1
human	Blautia faecis M25(T) (gm1152)	D-Glucose (5793, HMDB0000122, CHEBI:4167)	Acetate (175, CHEBI:30089)	FFAR2
human	Clostridium asparagiforme DSM 15981 (518636, gm1010)	D-Glucose (5793, HMDB0000122, CHEBI:4167)	Acetate (175, CHEBI:30089)	FFAR3
human	Clostridium pasteurianum (1501, gm0817)	D-Glucose (5793, HMDB0000122, CHEBI:4167)	Acetate (175, CHEBI:30089)	FOXP3
human	Clostridium scindens ATCC 35704 (411468, gm1133)	D-Glucose (5793, HMDB0000122, CHEBI:4167)	Acetate (175, CHEBI:30089)	GHRL
human	Clostridium sp. L2-50 (411489, gm0958)		Acetate (175, CHEBI:30089)	HDAC9
human	Eubacterium limosum (1736, gm0315)		Acetate (175, CHEBI:30089)	IL6
human	Eubacterium ramulus ATTC 29099 (gm0891)	Isoquercitrin (5280804, HMDB0037362, CHEBI:68352)	Acetate (175, CHEBI:30089)	LGR5
human	Eubacterium ramulus (39490, gm0737)	Isoquercitrin (5280804, HMDB0037362, CHEBI:68352)	Acetate (175, CHEBI:30089)	MUC2
human	Lawsonibacter asaccharolyticus 3BBH22T (gm1157)		Acetate (175, CHEBI:30089)	OCLN
human	Ruminococcus champanellensis 18P13(T) (gm1156)	D-(+)-Cellobiose (10712, CHEBI:36217)	Acetate (175, CHEBI:30089)	TJP1
human	Succinivibrio dextrinosolvens (83771, gm0755)	D-Glucose (5793, HMDB0000122, CHEBI:4167)	Acetate (175, CHEBI:30089)	TPH1
human	Clostridium (1485, gm0187)	Glycine (750, HMDB0000123, CHEBI:15428)	Acetyl phosphate(2-) (4183249, CHEBI:22191)
human	Bacteroides sp. MANG (298389, gm1069)	Mangiferin (5281647, HMDB0034410, CHEBI:6682)	Aglycone (CHEBI:166892)
human	Bifidobacterium pseudocatenulatum WC 0400 (gm0987)	Hesperidin (10621, HMBD0003265, CHEBI:28775)	Aglycone (CHEBI:166892)
human	Bifidobacterium pseudocatenulatum WC 0401 (gm0988)	Hesperidin (10621, HMBD0003265, CHEBI:28775)	Aglycone (CHEBI:166892)
human	Bifidobacterium pseudocatenulatum WC 0403 (gm0989)	Hesperidin (10621, HMBD0003265, CHEBI:28775)	Aglycone (CHEBI:166892)
human	Bifidobacterium pseudocatenulatum WC 0407 (gm0990)	Hesperidin (10621, HMBD0003265, CHEBI:28775)	Aglycone (CHEBI:166892)
human	Bifidobacterium pseudocatenulatum WC 0408 (gm0991)	Hesperidin (10621, HMBD0003265, CHEBI:28775)	Aglycone (CHEBI:166892)
human	Blautia (572511, gm0117)		Alanine (5950, HMDB0062251, CHEBI:16977)
human	Ruminococcus (1263, gm0587)		Alanine (5950, HMDB0062251, CHEBI:16977)
human	Blautia sp. MRG-PMF1 (gm1029)	4',5,7-Trimethoxyflavone (79730, HMDB0030842, CHEBI:174981)	Apigenin (5280443, HMDB0002124, CHEBI:18388)
human	Bifidobacterium longum H-1 (gm1098)	Arctiin (100528, CHEBI:80793)	Arctigenin (64981, CHEBI:391051)
human	Bacteroides thetaiotaomicron VPI-5482 (226186, gm1036)	D-Glucose (5793, CHEBI:4167)	Asparagine (6267, HMDB0000168, CHEBI:17196)
human	Ruminococcus gnavus (33038, gm0592)		beta-D-Fructofuranose (439709, CHEBI:28645)
human	Bifidobacterium catenulatum subsp. kashiwanohense APCKJ1 (gm1078)	N-Acetyl-D-lactosamine (9800166, CHEBI:60152)	beta-D-Gal-(1->4)-beta-D-GlcNAc-(1->3)-beta-D-Gal-(1->4)-D-Glc (9831622, HMDB0006567, CHEBI:60239)
human	Bacteroides distasonis (823, gm0818)		Bile acid (439520, CHEBI:22868)
human	Faecalibacterium prausnitzii (853, gm0327)	Cholesterol (5997, HMDB0000067, CHEBI:1307929)	Bile acid (439520, CHEBI:22868)
human	Haemophilus parainfluenzae (729, gm0358)	Cholesterol (5997, HMDB0000067, CHEBI:1307929)	Bile acid (439520, CHEBI:22868)	ANXA10 (11199)
human	Butyricimonas synergistica MT01(T) (gm1136)	D-Glucose (5793, HMDB0000122, CHEBI:4167)	Butyrate (104775, CHEBI:17968)	FOS
human	Butyricimonas virosa MT12(T) (gm1135)	D-Glucose (5793, HMDB0000122, CHEBI:4167)	Butyrate (104775, CHEBI:17968)	GHRL
human	Clostridium (1485, gm0187)		Butyrate (104775, CHEBI:17968)	HCAR2
human	Clostridium butyricum ATCC 19398 (1492, gm1099)		Butyrate (104775, CHEBI:17968)	FFAR2
human	Clostridium butyricum ATCC 19398 (1492, gm1099)		Butyrate (104775, CHEBI:17968)	HCAR2
human	Clostridium butyricum ATCC 19398 (1492, gm1099)		Butyrate (104775, CHEBI:17968)	CDKN1A
human	Clostridium pasteurianum (1501, gm0817)	D-Glucose (5793, HMDB0000122, CHEBI:4167)	Butyrate (104775, CHEBI:17968)	HDAC2
human	Clostridium tyrobutyricum (1519, gm0693)		Butyrate (104775, CHEBI:17968)	ANGPTL4
human	Eubacterium hallii (39488, gm0314)		Butyrate (104775, CHEBI:17968)	HDAC1
human	Eubacterium limosum (1736, gm0315)		Butyrate (104775, CHEBI:17968)	HDAC11
human	Eubacterium limosum (1736, gm0315)		Butyrate (104775, CHEBI:17968)	IL6
human	Eubacterium limosum (1736, gm0315)		Butyrate (104775, CHEBI:17968)	TLR4
human	Eubacterium ramulus ATTC 29099 (gm0891)	Isoquercitrin (5280804, HMDB0037362, CHEBI:68352)	Butyrate (104775, CHEBI:17968)	ALPI
human	Eubacterium ramulus (39490, gm0737)	Isoquercitrin (5280804, HMDB0037362, CHEBI:68352)	Butyrate (104775, CHEBI:17968)	HDAC9
human	Eubacterium rectale (39491, gm0316)	Acetate (175, CHEBI:30089)	Butyrate (104775, CHEBI:17968)	CCL2
human	Faecalibacterium prausnitzii A2-165 (411483, gm0932)		Butyrate (104775, CHEBI:17968)	HDAC8
human	Faecalibacterium prausnitzii ATCC 27768T (gm0961)		Butyrate (104775, CHEBI:17968)	CHGA
human	Faecalibacterium prausnitzii ATCC 27766 (gm0962)		Butyrate (104775, CHEBI:17968)	CLDN3
human	Faecalibacterium prausnitzii A2-165 (411483, gm0932)		Butyrate (104775, CHEBI:17968)	DCLK1
human	Faecalibacterium prausnitzii L2-6 (718252, gm0934)		Butyrate (104775, CHEBI:17968)	DEFB1
human	Faecalibacterium prausnitzii A2-165 (411483, gm0932)		Butyrate (104775, CHEBI:17968)	IL10
human	Faecalibacterium prausnitzii CNCM I-4543 (gm0979)		Butyrate (104775, CHEBI:17968)	IL1B
human	Faecalibacterium prausnitzii L2-6 (718252, gm0934)		Butyrate (104775, CHEBI:17968)	IL22RA1
human	Faecalibacterium prausnitzii CNCM I-4573 (gm0980)		Butyrate (104775, CHEBI:17968)	LYZ
human	Faecalibacterium prausnitzii A2-165 (411483, gm0932)		Butyrate (104775, CHEBI:17968)	HDAC3
human	Faecalibacterium prausnitzii (853, gm0327)		Butyrate (104775, CHEBI:17968)	CXCL8
human	Faecalibacterium prausnitzii (853, gm0327)		Butyrate (104775, CHEBI:17968)	NFKB1
human	Firmicutes (1239, gm0332)		Butyrate (104775, CHEBI:17968)	CXCR2
human	Firmicutes (1239, gm0332)		Butyrate (104775, CHEBI:17968)	MAPK3
human	Firmicutes (1239, gm0332)		Butyrate (104775, CHEBI:17968)	MAPK1
human	Firmicutes (1239, gm0332)		Butyrate (104775, CHEBI:17968)	LGR5
human	Fusobacteriia (203490, gm0343)		Butyrate (104775, CHEBI:17968)	MUC2
human	Fusobacteriia (203490, gm0343)		Butyrate (104775, CHEBI:17968)	MAPK3
human	Fusobacteriia (203490, gm0343)		Butyrate (104775, CHEBI:17968)	FFAR3
human	Fusobacteriia (203490, gm0343)		Butyrate (104775, CHEBI:17968)	JUN
human	Lawsonibacter asaccharolyticus 3BBH22T (gm1157)		Butyrate (104775, CHEBI:17968)	HDAC4
human	Prevotella copri (165179, gm0536)		Butyrate (104775, CHEBI:17968)	PLIN2
human	Prevotella copri (165179, gm0536)		Butyrate (104775, CHEBI:17968)	ANGPTL4
human	Roseburia inulinivorans A2–194(F) (gm1116)	L-Fucose (17106, HMDB0000174, CHEBI:2181)	Butyrate (104775, CHEBI:17968)	HDAC5
human	Roseburia sp. A2-181 (gm0956)		Butyrate (104775, CHEBI:17968)	TLR4
human	Roseburia sp. A2-183 (180589, gm0957)		Butyrate (104775, CHEBI:17968)	TNF
human	Bifidobacterium (1678, gm0105)	Chlorogenic acid (1794427, HMDB0003164, CHEBI:16112)	Caffeic acid (689043, HMDB0001964, CHEBI:16433)
human	Bifidobacterium animalis (28025, gm0107)	Chlorogenic acid (1794427, HMDB0003164, CHEBI:16112)	Caffeic acid (689043, HMDB0001964, CHEBI:16433)
human	Blautia sp. MRG-PMF1 (gm1029)	5,7-Dimethoxyflavone (88881, HMDB0036620, CHEBI:3684)	Chrysin (5281607, HMDB0036619, CHEBI:75095)
human	Lactobacillus (1578, gm0393)		Creatine (586, HMDB0000064, CHEBI:16919)
human	Lactobacillus ruminis (1623, gm0830)		Creatine (586, HMDB0000064, CHEBI:16919)
human	Bacteroides thetaiotaomicron VPI-5482 (226186, gm1036)	D-Glucose (5793, CHEBI:4167)	Cystine (595, CHEBI:17376)
human	Bifidobacterium catenulatum B7377 (gm1103)	Daidzin (107971, HMDB0033991, CHEBI:42202)	Daidzein (5281708, HMDB0003312, CHEBI:28197)
human	Bifidobacterium pseudocatenulatum B7003 (gm1100)	Daidzin (107971, HMDB0033991, CHEBI:42202)	Daidzein (5281708, HMDB0003312, CHEBI:28197)
human	Bifidobacterium adolescentis MB 114 (gm0994)		Daidzein (5281708, HMDB0003312, CHEBI:28197)
human	Bifidobacterium adolescentis MB 114 (gm0995)		Daidzein (5281708, HMDB0003312, CHEBI:28197)
human	Bifidobacterium adolescentis MB 114 (gm0996)		Daidzein (5281708, HMDB0003312, CHEBI:28197)
human	Bifidobacterium adolescentis B7304 (gm1102)	Daidzin (107971, HMDB0033991, CHEBI:42202)	Daidzein (5281708, HMDB0003312, CHEBI:28197)
human	Bifidobacterium bifidum MB 254 (gm0997)		Daidzein (5281708, HMDB0003312, CHEBI:28197)
human	Bifidobacterium breve MB 234 (gm0998)		Daidzein (5281708, HMDB0003312, CHEBI:28197)
human	Bifidobacterium breve MB 235 (gm0999)		Daidzein (5281708, HMDB0003312, CHEBI:28197)
human	Bifidobacterium breve B7824 (gm1104)	Daidzin (107971, HMDB0033991, CHEBI:42202)	Daidzein (5281708, HMDB0003312, CHEBI:28197)
human	Bifidobacterium infantis MB 208 (gm1000)		Daidzein (5281708, HMDB0003312, CHEBI:28197)
human	Bifidobacterium lactis MB 238 (gm1001)		Daidzein (5281708, HMDB0003312, CHEBI:28197)
human	Bifidobacterium longum MB 201 (gm1002)		Daidzein (5281708, HMDB0003312, CHEBI:28197)
human	Bifidobacterium longum MB 207 (gm1003)		Daidzein (5281708, HMDB0003312, CHEBI:28197)
human	Bifidobacterium longum MB 219 (gm1004)		Daidzein (5281708, HMDB0003312, CHEBI:28197)
human	Bifidobacterium longum subsp. infantis B7875 (gm1101)	Daidzin (107971, HMDB0033991, CHEBI:42202)	Daidzein (5281708, HMDB0003312, CHEBI:28197)
human	Bifidobacterium pseudocatenulatum MB 264 (gm1005)		Daidzein (5281708, HMDB0003312, CHEBI:28197)
human	Eubacterium limosum ATCC 8486 (gm1065)	Formononetin (5280378, HMDB0005808, CHEBI:18088)	Daidzein (5281708, HMDB0003312, CHEBI:28197)
human	Bifidobacterium (1678, gm0105)	Chlorogenic acid (1794427, HMDB0003164, CHEBI:16112)	Dehydroxychlorogenic acid
human	Clostridium scindens VPI 12708 (29347, gm0885)	Bile acid (439520, CHEBI:22868)	Deoxycholic acid (222528, HMDB0000626, CHEBI:28834)
human	Clostridium scindens VPI 12708 (29347, gm0885)	Cholic acid (221493, HMDB0000619, CHEBI:16359)	Deoxycholic acid (222528, HMDB0000626, CHEBI:28834)
human	Clostridium scindens VPI 12708 (29347, gm0885)	Chenodeoxycholic acid (10133, HMDB0000518, CHEBI:16755)	Deoxycholic acid (222528, HMDB0000626, CHEBI:28834)
human	Clostridium scindens ATCC35704 (411468, gm1076)	Bile acid (439520, CHEBI:22868)	Deoxycholic acid (222528, HMDB0000626, CHEBI:28834)
human	Faecalibacterium prausnitzii A2-165 (411483, gm0932)		D-Glucuronic Acid (94715, HMDB0000127, CHEBI:42717)
human	Bifidobacterium (1678, gm0105)	Chlorogenic acid (1794427, HMDB0003164, CHEBI:16112)	Dihydrocaffeic acid (348154, HMDB0000423, CHEBI:48400)
human	Bifidobacterium longum (216816, gm0112)		Dihydrocaffeic acid (348154, HMDB0000423, CHEBI:48400)
human	Clostridium orbiscindens I2 (gm0965)	Eriodictyol (440735, HMDB0005810, CHEBI:28412)	Dihydrocaffeic acid (348154, HMDB0000423, CHEBI:48400)
human	Clostridium orbiscindens I2 (gm0965)	Luteolin (5280445, HMDB0005800, CHEBI:15864)	Dihydrocaffeic acid (348154, HMDB0000423, CHEBI:48400)
human	Clostridium sporogenes ATCC15579 (gm1037)	Levodopa (6047, HMDB0000181, CHEBI:15765)	Dihydrocaffeic acid (348154, HMDB0000423, CHEBI:48400)
human	Eubacterium ramulus ATTC 29099 (gm0891)	Luteolin (5280445, HMDB0005800, CHEBI:15864)	Dihydrocaffeic acid (348154, HMDB0000423, CHEBI:48400)
human	Eubacterium ramulus ATTC 29099 (gm0891)	Eriodictyol (440735, HMDB0005810, CHEBI:28412)	Dihydrocaffeic acid (348154, HMDB0000423, CHEBI:48400)
human	Eubacterium ramulus (39490, gm0737)	Luteolin (5280445, HMDB0005800, CHEBI:15864)	Dihydrocaffeic acid (348154, HMDB0000423, CHEBI:48400)
human	Faecalibacterium prausnitzii A2-165 (411483, gm0932)		Dihydrocaffeic acid (348154, HMDB0000423, CHEBI:48400)
human	Lactobacillus mucosae (97478, gm0403)		Dihydrocaffeic acid (348154, HMDB0000423, CHEBI:48400)
human	Lactobacillus zeae (57037, gm0414)		Dihydrocaffeic acid (348154, HMDB0000423, CHEBI:48400)
human	Bifidobacterium (1678, gm0105)	Chlorogenic acid (1794427, HMDB0003164, CHEBI:16112)	Dihydrocaffeoyl-glycerol
human	Bifidobacterium (1678, gm0105)	Chlorogenic acid (1794427, HMDB0003164, CHEBI:16112)	Dihydrochlorogenic acid
human	Clostridium sp. TM-40 (371143, gm0893)	Daidzein (5281708, HMDB0003312, CHEBI:28197)	Dihydrodaidzein (176907, HMDB0005760, CHEBI:75842)
human	Clostridium sp. TM-40 (371143, gm0893)	Daidzin (107971, HMDB0033991, CHEBI:42202)	Dihydrodaidzein (176907, HMDB0005760, CHEBI:75842)
human	Clostridium sp. TM-40 (371143, gm0893)		Dihydrodaidzein (176907, HMDB0005760, CHEBI:75842)
human	Clostridium sp. HGH6 (gm1064)	daidzein (5281708, HMDB0003312, CHEBI:28197)	Dihydrodaidzein (176907, HMDB0005760, CHEBI:75842)
human	Lactobacillus mucosae EPI2 (gm0947)	Daidzein (5281708, HMDB0003312, CHEBI:28197)	Dihydrodaidzein (176907, HMDB0005760, CHEBI:75842)
human	Lactococcus sp. 20-92 (gm1068)	Daidzein (5281708, HMDB0003312, CHEBI:28197)	Dihydrodaidzein (176907, HMDB0005760, CHEBI:75842)
human	Eubacterium limosum (1736, gm0315)	Glycitein (5317750, HMDB0005781, CHEBI:542494)	Dihydroglycitein (101101166, CHEBI:174736)
human	Faecalibacterium prausnitzii ATCC 27768T (gm0961)		D-Lactic acid (61503, HMDB0001311, CHEBI:42111)
human	Faecalibacterium prausnitzii ATCC 27766 (gm0962)		D-Lactic acid (61503, HMDB0001311, CHEBI:42111)
human	Faecalibacterium prausnitzii A2-165 (411483, gm0932)		D-Lactic acid (61503, HMDB0001311, CHEBI:42111)
human	Faecalibacterium prausnitzii L2-6 (718252, gm0934)		D-Lactic acid (61503, HMDB0001311, CHEBI:42111)
human	Bacteroides thetaiotaomicron VPI-5482 (226186, gm1036)	D-Glucose (5793, CHEBI:4167)	DL-Alanine (602, HMDB0062251, CHEBI:16449)
human	Blautia producta (33035, gm1176)	Secoisolariciresinol (65373, HMDB0013692, CHEBI:65004)	Enterodiol (115089, HMDB0005056, CHEBI:544560)
human	Clostridium scindens (29347, gm0208)	Secoisolariciresinol (65373, HMDB0013692, CHEBI:65004)	Enterodiol (115089, HMDB0005056, CHEBI:544560)
human	Eubacterium sp. (142586, gm0880)	Secoisolariciresinol (65373, HMDB0013692, CHEBI:65004)	Enterodiol (115089, HMDB0005056, CHEBI:544560)
human	Bacteroides fragilis (817, gm0082)	Daidzein (5281708, HMDB0003312, CHEBI:28197)	Equol (91469, HMDB0002209, CHEBI:428126)
human	Bacteroides ovatus (28116, gm0084)	Daidzein (5281708, HMDB0003312, CHEBI:28197)	Equol (91469, HMDB0002209, CHEBI:428126)
human	Bacteroides ovatus (28116, gm0084)	Daidzein (5281708, HMDB0003312, CHEBI:28197)	Equol (91469, HMDB0002209, CHEBI:428126)
human	Bacteroides stercoris (46506, gm0717)	Daidzein (5281708, HMDB0003312, CHEBI:28197)	Equol (91469, HMDB0002209, CHEBI:428126)
human	Bacteroides thetaiotaomicron (818, gm0087)	Daidzein (5281708, HMDB0003312, CHEBI:28197)	Equol (91469, HMDB0002209, CHEBI:428126)
human	Bacteroides uniformis (820, gm0088)	Daidzein (5281708, HMDB0003312, CHEBI:28197)	Equol (91469, HMDB0002209, CHEBI:428126)
human	Bifidobacterium bifidum (1681, gm0108)	Daidzein (5281708, HMDB0003312, CHEBI:28197)	Equol (91469, HMDB0002209, CHEBI:428126)
human	Blautia producta SNU-Julong 732 (33035, gm1179)	Daidzein (5281708, HMDB0003312, CHEBI:28197)	Equol (91469, HMDB0002209, CHEBI:428126)
human	Blautia producta SNU-Julong 732 (33035, gm1179)	Dihydrodaidzein (176907, HMDB0005760, CHEBI:75842)	Equol (91469, HMDB0002209, CHEBI:428126)
human	Lactobacillus paracasei JS1 (gm1077)	Isoflavone (72304, CHEBI:18220)	Equol (91469, HMDB0002209, CHEBI:428126)	PTGS2
human	Lactobacillus paracasei JS1 (gm1077)	Isoflavone (72304, CHEBI:18220)	Equol (91469, HMDB0002209, CHEBI:428126)	IL18
human	Lactobacillus paracasei JS1 (gm1077)	Isoflavone (72304, CHEBI:18220)	Equol (91469, HMDB0002209, CHEBI:428126)	TNF
human	Lactobacillus paracasei JS1 (gm1077)	Isoflavone (72304, CHEBI:18220)	Equol (91469, HMDB0002209, CHEBI:428126)	IL1B
human	Lactobacillus paracasei JS1 (gm1077)	Isoflavone (72304, CHEBI:18220)	Equol (91469, HMDB0002209, CHEBI:428126)	IL4
human	Lactobacillus paracasei JS1 (gm1077)	Isoflavone (72304, CHEBI:18220)	Equol (91469, HMDB0002209, CHEBI:428126)	IL6
human	Lactococcus sp. 20-92 (gm1068)	Daidzein (5281708, HMDB0003312, CHEBI:28197)	Equol (91469, HMDB0002209, CHEBI:428126)	TNF
human	Veillonella sp. EP (1926307, gm1180)	Daidzein (5281708, HMDB0003312, CHEBI:28197)	Equol (91469, HMDB0002209, CHEBI:428126)
human	Bacteroides caccae (47678, gm0079)		Ethyl phenyllactate, (-)- (9877619, HMDB0032618)
human	Clostridium sp. (1506, gm0210)		Ethyl phenyllactate, (-)- (9877619, HMDB0032618)
human	Bifidobacterium (1678, gm0105)		Folic acid (135398658, HMDB0000121, CHEBI:27470)
human	Bifidobacterium adolescentis B7304 (gm1102)	Genistin (5281377, HMDB0033988, CHEBI:27514)	Genistein (5280961, HMDB0003217, CHEBI:28088)
human	Bifidobacterium catenulatum B7377 (gm1103)	Genistin (5281377, HMDB0033988, CHEBI:27514)	Genistein (5280961, HMDB0003217, CHEBI:28088)
human	Bifidobacterium pseudocatenulatum B7003 (gm1100)	Genistin (5281377, HMDB0033988, CHEBI:27514)	Genistein (5280961, HMDB0003217, CHEBI:28088)
human	Bifidobacterium breve B7824 (gm1104)	Genistin (5281377, HMDB0033988, CHEBI:27514)	Genistein (5280961, HMDB0003217, CHEBI:28088)
human	Bifidobacterium longum subsp. infantis B7875 (gm1101)	Genistin (5281377, HMDB0033988, CHEBI:27514)	Genistein (5280961, HMDB0003217, CHEBI:28088)
human	Eubacterium limosum ATCC 8486 (gm1065)	Biochanin A (5280373, HMDB0002338, CHEBI:17574)	Genistein (5280961, HMDB0003217, CHEBI:28088)
human	Bacteroides stercoris HJ-15 (gm1113)	Ginsenoside Rg3 (9918693, HMDB0039546, CHEBI:67991)	Ginsenoside Rh2 (119307, CHEBI:77147)
human	Eubacterium sp. A-44 (394229, gm0715)	Ginsenoside Rg3 (9918693, HMDB0039546, CHEBI:67991)	Ginsenoside Rh2 (119307, CHEBI:77147)
human	Bifidobacterium longum H-1 (gm1098)	Ginsenoside Rb1 (9898279, HMDB0035892, CHEBI:67989)	Ginsenoside-Rd (24721561, HMDB0035778)
human	Bacteroides thetaiotaomicron VPI-5482 (226186, gm1036)	D-Glucose (5793, CHEBI:4167)	Glutathione (124886, HMDB0000125, CHEBI:16856)
human	Ruminococcus bromii (40518, gm0588)	Phytoestrogens (56842207)	Glycerol (753, HMDB0000131, CHEBI:17754)
human	Blautia (572511, gm0117)		Glycine (750, HMDB0000123, CHEBI:15428)
human	Lactobacillus ruminis (1623, gm0830)		Glycine (750, HMDB0000123, CHEBI:15428)
human	Ruminococcus (1263, gm0587)		Glycine (750, HMDB0000123, CHEBI:15428)
human	Bifidobacterium adolescentis B7304 (gm1102)	Glycitin (187808, HMDB0002219, CHEBI:80373)	Glycitein (5317750, HMDB0005781, CHEBI:542494)
human	Bifidobacterium catenulatum B7377 (gm1103)	Glycitin (187808, HMDB0002219, CHEBI:80373)	Glycitein (5317750, HMDB0005781, CHEBI:542494)
human	Bifidobacterium pseudocatenulatum B7003 (gm1100)	Glycitin (187808, HMDB0002219, CHEBI:80373)	Glycitein (5317750, HMDB0005781, CHEBI:542494)
human	Bifidobacterium breve B7824 (gm1104)	Glycitin (187808, HMDB0002219, CHEBI:80373)	Glycitein (5317750, HMDB0005781, CHEBI:542494)
human	Bifidobacterium longum subsp. infantis B7875 (gm1101)	Glycitin (187808, HMDB0002219, CHEBI:80373)	Glycitein (5317750, HMDB0005781, CHEBI:542494)
human	Bacteroides fragilis (817, gm0082)		Glycocholic acid (10140, HMDB0000138, CHEBI:17687)
human	Butyricicoccus pullicaecorum (501571, gm0135)		Glycocholic acid (10140, HMDB0000138, CHEBI:17687)
human	Ruminococcus flavefaciens (1265, gm0590)		Glycocholic acid (10140, HMDB0000138, CHEBI:17687)
human	Eubacterium ramulus DSM 16296 (gm0898)	beta-D-Glucopyranoside, 3,5-dihydroxy-4-(3-(3-hydroxy-4-methoxyphenyl)-1-oxopropyl)phenyl (168008)	Hesperetin dihydrochalcone (147608, HMDB0128062)
human	Bacteroides thetaiotaomicron VPI-5482 (226186, gm1036)	D-Glucose (5793, CHEBI:4167)	Histidine (6274, HMDB0000177, CHEBI:15971)
human	Bacteroides (816, gm0077)	Arbutin (440936, HMDB0029943, CHEBI:18305)	Hydroquinone (785, HMDB0002434, CHEBI:17594)	BCL2 (596)
human	Bacteroides (816, gm0077)	Arbutin (440936, HMDB0029943, CHEBI:18305)	Hydroquinone (785, HMDB0002434, CHEBI:17594)	BAX (581)
human	Bacteroides (816, gm0077)	Arbutin (440936, HMDB0029943, CHEBI:18305)	Hydroquinone (785, HMDB0002434, CHEBI:17594)	CASP3 (836)
human	Bifidobacterium (1678, gm0105)	Arbutin (440936, HMDB0029943, CHEBI:18305)	Hydroquinone (785, HMDB0002434, CHEBI:17594)	BCL2 (596)
human	Bifidobacterium (1678, gm0105)	Arbutin (440936, HMDB0029943, CHEBI:18305)	Hydroquinone (785, HMDB0002434, CHEBI:17594)	BAX (581)
human	Bifidobacterium (1678, gm0105)	Arbutin (440936, HMDB0029943, CHEBI:18305)	Hydroquinone (785, HMDB0002434, CHEBI:17594)	CASP3 (836)
human	Bifidobacterium longum H-1 (gm1098)	Arbutin (440936, HMDB0029943, CHEBI:18305)	Hydroquinone (785, HMDB0002434, CHEBI:17594)
human	Eubacterium (1730, gm0309)	Arbutin (440936, HMDB0029943, CHEBI:18305)	Hydroquinone (785, HMDB0002434, CHEBI:17594)	BCL2 (596)
human	Eubacterium (1730, gm0309)	Arbutin (440936, HMDB0029943, CHEBI:18305)	Hydroquinone (785, HMDB0002434, CHEBI:17594)	BAX (581)
human	Eubacterium (1730, gm0309)	Arbutin (440936, HMDB0029943, CHEBI:18305)	Hydroquinone (785, HMDB0002434, CHEBI:17594)	CASP3 (836)
human	Bacteroides sp. 45 (gm1056)	Quercitrin (5280459, HMDB0033751, CHEBI:17558)	Hydroxyquercitrin (129887767)
human	Lactobacillus (1578, gm0393)	Tryptophan (6305, CHEBI:16828)	Indole-3-carboxaldehyde (10256, HMDB0029737, CHEBI:28238)	IL22 (50616)
human	Clostridium sporogenes Ll.LtrB-eryR ΩfldC (gm1038)	Tryptophan (6305, HMDB0000929, CHEBI:16828)	Indole-3-lactic acid (92904, CHEBI:24813)
human	Butyricimonas synergistica MT01(T) (gm1136)	D-Glucose (5793, HMDB0000122, CHEBI:4167)	Isobutyric acid (6590, HMDB0001873, CHEBI:16135)
human	Butyricimonas virosa MT12(T) (gm1135)	D-Glucose (5793, HMDB0000122, CHEBI:4167)	Isobutyric acid (6590, HMDB0001873, CHEBI:16135)
human	Bacillus sp. 52 (gm1070)	Rutin (5280805, HMDB0003249, CHEBI:28527)	Isoquercitrin (5280804, HMDB0037362, CHEBI:68352)
human	Bacillus sp. 46 (1266601, gm1132)	Quercetin (5280343, HMDB0005794, CHEBI:16243)	Isoquercitrin (5280804, HMDB0037362, CHEBI:68352)
human	Bacteroides sp. 45 (gm1056)	Rutin (5280805, HMDB0003249, CHEBI:28527)	Isoquercitrin (5280804, HMDB0037362, CHEBI:68352)
human	Bacteroides sp. 22 (gm1072)	Rutin (5280805, HMDB0003249, CHEBI:28527)	Isoquercitrin (5280804, HMDB0037362, CHEBI:68352)
human	Bifidobacterium adolescentis B7304 (gm1102)	Astragalin (5282102, HMDB0037429, CHEBI:30200)	Kaempferol (5280863, HMDB0005801, CHEBI:28499)
human	Bifidobacterium catenulatum B7377 (gm1103)	Astragalin (5282102, HMDB0037429, CHEBI:30200)	Kaempferol (5280863, HMDB0005801, CHEBI:28499)
human	Bifidobacterium pseudocatenulatum B7003 (gm1100)	Astragalin (5282102, HMDB0037429, CHEBI:30200)	Kaempferol (5280863, HMDB0005801, CHEBI:28499)
human	Bifidobacterium breve B7824 (gm1104)	Astragalin (5282102, HMDB0037429, CHEBI:30200)	Kaempferol (5280863, HMDB0005801, CHEBI:28499)
human	Bifidobacterium longum subsp. infantis B7875 (gm1101)	Astragalin (5282102, HMDB0037429, CHEBI:30200)	Kaempferol (5280863, HMDB0005801, CHEBI:28499)
human	Bacteroides thetaiotaomicron VPI-5482 (226186, gm1036)	D-Glucose (5793, CHEBI:4167)	Lactate (91435, CHEBI:24996)
human	Bifidobacterium (1678, gm0105)		Lactate (91435, CHEBI:24996)
human	Bifidobacterium longum IPLA E44 (gm0993)	Exopolysaccharides (CHEBI:72813)	Lactate (91435, CHEBI:24996)
human	Bifidobacterium longum (216816, gm0112)	Xyloglucan Heptasaccharide (44630346, HMDB0006611)	Lactate (91435, CHEBI:24996)
human	Blautia faecis M25(T) (gm1152)	D-Glucose (5793, HMDB0000122, CHEBI:4167)	Lactate (91435, CHEBI:24996)
human	Clostridium asparagiforme DSM 15981 (518636, gm1010)	D-Glucose (5793, HMDB0000122, CHEBI:4167)	Lactate (91435, CHEBI:24996)
human	Succinivibrio dextrinosolvens (83771, gm0755)	D-Glucose (5793, HMDB0000122, CHEBI:4167)	Lactate (91435, CHEBI:24996)
human	Bifidobacterium catenulatum subsp. kashiwanohense APCKJ1 (gm1078)	Galbeta1,3GlcNAc (440994, CHEBI:27707)	Lacto-N-tetraose (440993, HMDB0006566, CHEBI:30248)
human	Bacteroides thetaiotaomicron VPI-5482 (226186, gm1036)	D-Glucose (5793, CHEBI:4167)	L-Cysteine (5862, HMDB0000574, CHEBI:17561)
human	Blautia (572511, gm0117)		Leucine (6106, HMDB0000687, CHEBI:15603)
human	Faecalibacterium prausnitzii (853, gm0327)		Leucine (6106, HMDB0000687, CHEBI:15603)
human	Ruminococcus (1263, gm0587)		Leucine (6106, HMDB0000687, CHEBI:15603)
human	Bacillus sp. 52 (gm1070)	Rutin (5280805, HMDB0003249, CHEBI:28527)	Leucocianidol (71629, CHEBI:15758)
human	Bacteroides sp. 45 (gm1056)	Rutin (5280805, HMDB0003249, CHEBI:28527)	Leucocianidol (71629, CHEBI:15758)
human	Bacteroides sp. 42 (gm1071)	Rutin (5280805, HMDB0003249, CHEBI:28527)	Leucocianidol (71629, CHEBI:15758)
human	Veillonella sp. 32 (gm1073)	Rutin (5280805, HMDB0003249, CHEBI:28527)	Leucocianidol (71629, CHEBI:15758)
human	Blautia (572511, gm0117)		l-Isoleucine (6306, HMDB0000172, CHEBI:17191)
human	Ruminococcus (1263, gm0587)		l-Isoleucine (6306, HMDB0000172, CHEBI:17191)
human	Clostridium scindens VPI 12708 (29347, gm0885)	Bile acid (439520, CHEBI:22868)	Lithocholic acid (9903, HMDB0000761, CHEBI:16325)
human	Clostridium scindens VPI 12708 (29347, gm0885)	Cholic acid (221493, HMDB0000619, CHEBI:16359)	Lithocholic acid (9903, HMDB0000761, CHEBI:16325)
human	Clostridium scindens VPI 12708 (29347, gm0885)	Chenodeoxycholic acid (10133, HMDB0000518, CHEBI:16755)	Lithocholic acid (9903, HMDB0000761, CHEBI:16325)
human	Clostridium scindens ATCC35704 (411468, gm1076)	Bile acid (439520, CHEBI:22868)	Lithocholic acid (9903, HMDB0000761, CHEBI:16325)
human	Faecalibacterium prausnitzii (853, gm0327)		Malic acid (525, CHEBI:6650)
human	Eubacterium ramulus (39490, gm0737)	Apigenin (5280443, HMDB0002124, CHEBI:18388)	Naringenin (439246, HMDB0002670, CHEBI:50202)
human	Eubacterium ramulus (39490, gm0737)	5,7-Dihydroxy-2-(4-hydroxyphenyl)chroman-4-one (932, HMDB0002670, CHEBI:50202)	Naringenin chalcone (5280960, HMDB0029631, CHEBI:15413)
human	Eubacterium ramulus (39490, gm0737)	Naringenin (439246, HMDB0002670, CHEBI:50202)	Naringenin chalcone (5280960, HMDB0029631, CHEBI:15413)
human	Bacteroides sp. MANG (298389, gm1069)	Mangiferin (5281647, HMDB0034410, CHEBI:6682)	Norathyriol (5281656, CHEBI:7622)
human	Clostridium sp. HGH136 (gm1140)	Daidzein (5281708, HMDB0003312, CHEBI:28197)	O-Desmethylangolensin (89472, HMDB0004629, CHEBI:88902)
human	Eubacterium ramulus (39490, gm0737)	Daidzein (5281708, HMDB0003312, CHEBI:28197)	O-Desmethylangolensin (89472, HMDB0004629, CHEBI:88902)
human	Lactobacillus mucosae EPI2 (gm0947)	Daidzein (5281708, HMDB0003312, CHEBI:28197)	O-Desmethylangolensin (89472, HMDB0004629, CHEBI:88902)
human	Bacteroides (816, gm0077)	Phosphoenolpyruvate (1005, HMDB0000263, CHEBI:44897)	Oxalacetic acid (970, HMDB0000223, CHEBI:30744)
human	Faecalibacterium prausnitzii A2-165 (411483, gm0932)		Palmitic acid (985, HMDB0000220, CHEBI:15756)
human	Eubacterium ramulus ATTC 29099 (gm0891)	Cynaroside (5280637, HMDB0035588, CHEBI:27994)	Phenolic acid (CHEBI:166890)
human	Eubacterium ramulus ATTC 29099 (gm0891)	Taxifolin (439533, CHEBI:17948)	Phenolic acid (CHEBI:166890)
human	Eubacterium ramulus ATTC 29099 (gm0891)	Phloretin (4788, HMDB0003306, CHEBI:17276)	Phenolic acid (CHEBI:166890)
human	Eubacterium ramulus ATTC 29099 (gm0891)	Luteolin (5280445, HMDB0005800, CHEBI:15864)	Phenolic acid (CHEBI:166890)
human	Eubacterium ramulus ATTC 29099 (gm0891)	Naringenin (439246, HMDB0128074, CHEBI:17846)	Phenolic acid (CHEBI:166890)
human	Eubacterium ramulus ATTC 29099 (gm0891)	Eriodictyol (440735, HMDB0005810, CHEBI:28412)	Phenolic acid (CHEBI:166890)
human	Eubacterium ramulus ATTC 29099 (gm0891)	Kaempferol (5280863, HMDB0005801, CHEBI:28499)	Phenolic acid (CHEBI:166890)
human	Eubacterium ramulus ATTC 29099 (gm0891)	Rutin (5280805, HMDB0003249, CHEBI:28527)	Phenolic acid (CHEBI:166890)
human	Eubacterium ramulus ATTC 29099 (gm0891)	Quercetin (5280343, HMDB0005794, CHEBI:16243)	Phenolic acid (CHEBI:166890)
human	Bifidobacterium (1678, gm0105)	Chlorogenic acid (1794427, HMDB0003164, CHEBI:16112)	Phenylacetic acid (999, HMDB0000209, CHEBI:30745)
human	Eubacterium ramulus (39490, gm0737)	Naringenin chalcone (5280960, HMDB0029631, CHEBI:15413)	Phloretin (4788, HMDB0003306, CHEBI:17276)
human	Eubacterium ramulus (39490, gm0737)	Naringenin chalcone (5280960, HMDB0029631, CHEBI:15413)	Phloretin (4788, HMDB0003306, CHEBI:17276)
human	Eubacterium ramulus (39490, gm0737)	Phloretin (4788, HMDB0003306, CHEBI:17276)	Phloroglucinol (359, CHEBI:16204)
human	Eubacterium ramulus (39490, gm0737)	Phloretin (4788, HMDB0003306, CHEBI:17276)	Phloroglucinol (359, CHEBI:16204)
human	Eubacterium ramulus ATTC 29099 (gm0891)		Phloroglucinol (359, HMDB0013675, CHEBI:16204)
human	Lactobacillus casei Shirota (gm0953)		Pipecolic acid (849, HMDB0000070, CHEBI:17964)
human	Bacillus sp.46 (1266601, gm1018)		Platycodin D (162859, CHEBI:70436)
human	Bifidobacterium dentium (1689, gm0111)	Poncirin (442456, HMDB0037487, CHEBI:66773)	Ponciretin (25201019)
human	Blautia (572511, gm0117)		Proline (145742, HMDB0000162, CHEBI:17203)
human	Ruminococcus (1263, gm0587)		Proline (145742, HMDB0000162, CHEBI:17203)
human	Roseburia inulinivorans A2–194(F) (gm1116)	L-Fucose (17106, HMDB0000174, CHEBI:2181)	Propanol (1031, CHEBI:28831)
human	Bacteroides (816, gm0077)	Succinate (160419, CHEBI:30031)	Propionate (104745, CHEBI:17272)
human	Bacteroides thetaiotaomicron VPI-5482 (226186, gm1036)	D-Glucose (5793, CHEBI:4167)	Propionate (104745, CHEBI:17272)
human	Eubacterium limosum (1736, gm0315)		Propionate (104745, CHEBI:17272)	IL6 (3569)
human	Haemophilus parainfluenzae (729, gm0358)	Cholesterol (5997, HMDB0000067, CHEBI:1307929)	Propionate (104745, CHEBI:17272)	ANXA10 (11199)
human	Parasutterella excrementihominis YIT 11859(T) (gm1134)		Propionate (104745, CHEBI:17272)
human	Phascolarctobacterium succinatutens YIT 12067T (gm0968)	Succinate (160419, CHEBI:30031)	Propionate (104745, CHEBI:17272)
human	Phascolarctobacterium succinatutens YIT 12068T (gm0969)	Succinate (160419, CHEBI:30031)	Propionate (104745, CHEBI:17272)
human	Propionibacterium avidum (33010, gm0857)		Propionate (104745, CHEBI:17272)
human	Roseburia inulinivorans A2–194(F) (gm1116)	L-Fucose (17106, HMDB0000174, CHEBI:2181)	Propionate (104745, CHEBI:17272)
human	Ruminococcus bromii (40518, gm0588)	Phytoestrogens (56842207)	Propionate (104745, CHEBI:17272)
human	Veillonella (29465, gm0676)		Propionate (104745, CHEBI:17272)
human	Veillonella ratti (103892, gm0697)		Propionate (104745, CHEBI:17272)
human	Bacteroides stercoris HJ-15 (gm1113)	20(R)-Ginsenoside Rh2 (54580480)	Protopanaxadiol (9920281, CHEBI:76237)
human	Clostridium (1485, gm0187)	DL-Alanine (602, HMDB0062251, CHEBI:16449)	Pyruvate (107735, CHEBI:15361)
human	Bacillus sp. 46 (1266601, gm1132)	Avicularin (5490064, HMDB0030860, CHEBI:65460)	Quercetin (5280343, HMDB0005794, CHEBI:16243)
human	Bacteroides ovatus (28116, gm0084)	Rutin (5280805, HMDB0003249, CHEBI:28527)	Quercetin (5280343, HMDB0005794, CHEBI:16243)
human	Bacteroides sp. 45 (gm1056)	Quercitrin (5280459, HMDB0033751, CHEBI:17558)	Quercetin (5280343, HMDB0005794, CHEBI:16243)
human	Bacteroides uniformis (820, gm0088)	Rutin (5280805, HMDB0003249, CHEBI:28527)	Quercetin (5280343, HMDB0005794, CHEBI:16243)
human	Bifidobacterium dentium (1689, gm0111)	Rutin (5280805, HMDB0003249, CHEBI:28527)	Quercetin (5280343, HMDB0005794, CHEBI:16243)
human	Bacillus sp. 46 (1266601, gm1132)	Quercetin (5280343, HMDB0005794, CHEBI:16243)	Quercimeritrin (5282160, CHEBI:28529)
human	Bacillus sp. 46 (1266601, gm1132)	Quercetin (5280343, HMDB0005794, CHEBI:16243)	Quercitrin (5280459, HMDB0033751, CHEBI:17558)
human	Bifidobacterium animalis (28025, gm0107)	Chlorogenic acid (1794427, HMDB0003164, CHEBI:16112)	Quinic acid (6508, HMDB0003072, CHEBI:17521)
human	Bacteroides fragilis SDG-Mt85-5B (817, gm1170)	Secoisolariciresinol diglucoside (9917980, HMDB0036323)	Secoisolariciresinol (65373, HMDB0013692, CHEBI:65004)
human	Bacteroides fragilis SDG-Mt85-4C (817, gm1171)	Secoisolariciresinol diglucoside (9917980, HMDB0036323)	Secoisolariciresinol (65373, HMDB0013692, CHEBI:65004)
human	Bacteroides fragilis DIfE-05 (817, gm1172)	Secoisolariciresinol diglucoside (9917980, HMDB0036323)	Secoisolariciresinol (65373, HMDB0013692, CHEBI:65004)
human	Bacteroides ovatus SDG-Mt85-3C (28116, gm1174)	Secoisolariciresinol diglucoside (9917980, HMDB0036323)	Secoisolariciresinol (65373, HMDB0013692, CHEBI:65004)
human	Clostridium sp. SDG-Mt85-3Db (1506, gm1169)	Secoisolariciresinol diglucoside (9917980, HMDB0036323)	Secoisolariciresinol (65373, HMDB0013692, CHEBI:65004)
human	Blautia (572511, gm0117)		Serine (5951, HMDB0000187, CHEBI:17115)
human	Faecalibacterium prausnitzii (853, gm0327)		Serine (5951, HMDB0000187, CHEBI:17115)
human	Ruminococcus (1263, gm0587)		Serine (5951, HMDB0000187, CHEBI:17115)
human	Bacteroides (816, gm0077)	Fumarate (5460307, CHEBI:29806)	Succinate (160419, CHEBI:30031)
human	Bacteroides distasonis (823, gm0818)		Succinate (160419, CHEBI:30031)
human	Bacteroides thetaiotaomicron VPI-5482 (226186, gm1036)	D-Glucose (5793, CHEBI:4167)	Succinate (160419, CHEBI:30031)
human	Prevotellaceae (171552, gm0540)		Succinate (160419, CHEBI:30031)
human	Ruminococcus champanellensis 18P13(T) (gm1156)	D-(+)-Cellobiose (10712, CHEBI:36217)	Succinate (160419, CHEBI:30031)
human	Succinivibrio dextrinosolvens (83771, gm0755)	D-Glucose (5793, HMDB0000122, CHEBI:4167)	Succinate (160419, CHEBI:30031)
human	Veillonellaceae (31977, gm0680)		Succinate (160419, CHEBI:30031)
human	Bacteroides caccae (47678, gm0079)		Tartaric acid (875, HMDB0062642, CHEBI:15674)
human	Ruminococcus bromii (40518, gm0588)		Tartaric acid (875, HMDB0062642, CHEBI:15674)
human	Bifidobacterium (1678, gm0105)		Trimethylamine oxide (1145, HMDB0000925, CHEBI:15724)
human	Blautia (572511, gm0117)		Trimethylamine oxide (1145, HMDB0000925, CHEBI:15724)
human	Lactobacillus (1578, gm0393)		Trimethylamine oxide (1145, HMDB0000925, CHEBI:15724)
human	Ruminococcus (1263, gm0587)		Ursodeoxycholic acid (31401, HMDB0000946, CHEBI:9907)
human	Bacteroides distasonis (823, gm0818)			NFKB1 (4790)
human	Bacteroides distasonis (823, gm0818)			CXCL8 (3576)
human	Bacteroides fragilis (817, gm0082)			FFAR2 (2867)
human	Bacteroides fragilis (817, gm0082)			FOXP3 (50943)
human	Bacteroides fragilis (817, gm0082)			IL10 (3586)
human	Bacteroides fragilis ATCC 23745 (gm1123)			TLR2 (7097)
human	Bacteroides fragilis ATCC 23745 (gm1123)			TLR4 (7099)
human	Bacteroides fragilis ATCC 23745 (gm1123)			IFNG (3458)
human	Bacteroides fragilis ATCC 23745 (gm1123)			IL4 (3565)
human	Bacteroides fragilis ATCC 23745 (gm1123)			IL10 (3586)
human	Bacteroides vulgatus (821, gm0089)			NFKB1 (4790)
human	Bacteroides vulgatus (821, gm0089)			CXCL8 (3576)
human	Bacteroidetes (976, gm0090)			NR1H4 (9971)
human	Bacteroidetes (976, gm0090)			GLP1R (2740)
human	Bacteroidetes (976, gm0090)			NR1H4 (9971)
human	Bacteroidetes (976, gm0090)			GLP1R (2740)
human	Bifidobacterium adolescentis (1680, gm0106)			NFKB1 (4790)
human	Bifidobacterium adolescentis (1680, gm0106)			CXCL8 (3576)
human	Bifidobacterium animalis subsp. lactis BB-12 (552531, gm1121)			TNF (7124)
human	Bifidobacterium longum (216816, gm0112)			CYP7A1 (1581)
human	Bifidobacterium longum (216816, gm0112)			GPBAR1 (151306)
human	Bifidobacterium longum subsp. infantis ATCC 15697 = JCM 1222 = DSM 20088 (391904, gm0910)			OCLN (100506658)
human	Eubacterium rectale (39491, gm0316)			DUOX2 (50506)
human	Eubacterium rectale (39491, gm0316)			CXCL6 (6372)
human	Faecalibacterium prausnitzii (853, gm0327)			IL10 (3586)
human	Faecalibacterium prausnitzii (853, gm0327)			IL12B (3593)
human	Faecalibacterium prausnitzii (853, gm0327)			IL12A (3592)
human	Faecalibacterium prausnitzii A2-165 (411483, gm0932)			CCR6 (1235)
human	Faecalibacterium prausnitzii A2-165 (411483, gm0932)			CXCR6 (10663)
human	Faecalibacterium prausnitzii A2-165 (411483, gm0932)			CXCR3 (2833)
human	Faecalibacterium prausnitzii A2-165 (411483, gm0932)			CXCL8 (3576)
human	Faecalibacterium prausnitzii L2-6 (718252, gm0934)			CXCL8 (3576)
human	Faecalibacterium prausnitzii M 21/2 (gm0981)			CXCL8 (3576)
human	Faecalibacterium prausnitzii CNCM I-4541 (gm0982)			CXCL8 (3576)
human	Faecalibacterium prausnitzii CNCM I-4543 (gm0979)			CXCL8 (3576)
human	Faecalibacterium prausnitzii CNCM I-4546 (gm0983)			CXCL8 (3576)
human	Faecalibacterium prausnitzii CNCM I-4573 (gm0980)			CXCL8 (3576)
human	Faecalibacterium prausnitzii CNCM I-4644 (gm0984)			CXCL8 (3576)
human	Faecalibacterium prausnitzii CNCM I-4575 (gm0985)			CXCL8 (3576)
human	Faecalibacterium prausnitzii (853, gm0327)			IL10 (3586)
human	Faecalibacterium prausnitzii (853, gm0327)			TGFB1 (7040)
human	Faecalibacterium prausnitzii (853, gm0327)			FOXP3 (50943)
human	Faecalibacterium prausnitzii (853, gm0327)			NFKB1 (4790)
human	Faecalibacterium prausnitzii (853, gm0327)			IL12A (3592)
human	Faecalibacterium prausnitzii (853, gm0327)			IL12B (3593)
human	Faecalibacterium prausnitzii (853, gm0327)			IL10 (3586)
human	Faecalibacterium prausnitzii A2-165 (411483, gm0932)			IL1A (3552)
human	Faecalibacterium prausnitzii A2-165 (411483, gm0932)			IL2 (3558)
human	Faecalibacterium prausnitzii A2-165 (411483, gm0932)			IL5 (3567)
human	Faecalibacterium prausnitzii HTF-F (gm0935)			IL12A (3592)
human	Faecalibacterium prausnitzii HTF-F (gm0935)			IL12B (3593)
human	Faecalibacterium prausnitzii HTF-F (gm0935)			IL17A (3605)
human	Faecalibacterium prausnitzii A2-165 (411483, gm0932)			CXCL8 (3576)
human	Faecalibacterium prausnitzii A2-165 (411483, gm0932)			NFKB1 (4790)
human	Faecalibacterium prausnitzii A2-165 (411483, gm0932)			IL10 (3586)
human	Faecalibacterium prausnitzii A2–165 (411483, gm1066)			TLR2 (7097)
human	Faecalibacterium prausnitzii A2–165 (411483, gm1066)			TLR6 (10333)
human	Faecalibacterium prausnitzii A2–165 (411483, gm1066)			TLR4 (7099)
human	Faecalibacterium prausnitzii (853, gm0327)			IL12B (3593)
human	Faecalibacterium prausnitzii (853, gm0327)			IFNG (3458)
human	Faecalibacterium prausnitzii (853, gm0327)			IL10 (3586)
human	Firmicutes (1239, gm0332)			TLR2 (7097)
human	Lactobacillus (1578, gm0393)			IL22 (50616)
human	Lactobacillus (1578, gm0393)			MAPK14 (1432)
human	Lactobacillus acidophilus ATCC 4357 (gm1148)			FOS (2353)
human	Lactobacillus acidophilus ATCC 4357 (gm1148)			JUN (3725)
human	Lactobacillus acidophilus ATCC 4357 (gm1148)			PGP (283871)
human	Lactobacillus acidophilus 4357 (gm1155)			SLC9A3 (6550)
human	Lactobacillus acidophilus ATCC 4357 (gm1148)			RELA (5970)
human	Lactobacillus acidophilus ATCC 4357 (gm1148)			CXCL8 (3576)
human	Lactobacillus acidophilus ATCC 4357 (gm1148)			BCL10 (8915)
human	Lactobacillus acidophilus ATCC 4357 (gm1148)			SLC26A3 (1811)
human	Lactobacillus fermentum ACA-DC 179 (gm1059)			IL10 (3586)
human	Lactobacillus fermentum ACA-DC 179 (gm1059)			TNF (7124)
human	Lactobacillus plantarum (1590, gm0405)			OCLN (100506658)
human	Lactobacillus plantarum (1590, gm0405)			TJP1 (7082)
human	Lactobacillus plantarum (1590, gm0405)			CLDN1 (9076)
human	Lactobacillus plantarum (1590, gm0405)			CLDN4 (1364)
human	Lactobacillus plantarum (1590, gm0405)			F11R (50848)
human	Lactobacillus plantarum MB452 (gm1053)			OCLN (100506658)
human	Lactobacillus plantarum MB452 (gm1053)			CGN (57530)
human	Lactobacillus plantarum MB452 (gm1053)			TJP1 (7082)
human	Lactobacillus plantarum MB452 (gm1053)			TJP2 (9414)
human	Lactobacillus plantarum MB452 (gm1053)			GJC1 (10052)
human	Lactobacillus plantarum 299v (gm1057)			LEP (3952)
human	Lactobacillus plantarum ACA-DC 287 (gm1060)			IL10 (3586)
human	Lactobacillus plantarum ACA-DC 287 (gm1060)			IL12B (3593)
human	Lactobacillus plantarum ACA-DC 287 (gm1060)			IFNG (3458)
human	Lactobacillus plantarum ACA-DC 287 (gm1060)			TNF (7124)
human	Lactobacillus plantarum (1590, gm0405)			CLDN1 (9076)
human	Lactobacillus plantarum (1590, gm0405)			OCLN (100506658)
human	Lactobacillus plantarum (1590, gm0405)			F11R (50848)
human	Lactobacillus plantarum (1590, gm0405)			TJP1 (7082)
human	Lactobacillus plantarum (1590, gm0405)			SLC5A8 (160728)
human	Lactobacillus plantarum L9 (gm1147)			TNF (7124)
human	Lactobacillus plantarum L9 (gm1147)			CXCL8 (3576)
human	Lactobacillus rhamnosus (47715, gm0408)			TJP1 (7082)
human	Lactobacillus rhamnosus (47715, gm0408)			CLDN1 (9076)
human	Lactobacillus rhamnosus (47715, gm0408)			OCLN (100506658)
human	Lactobacillus rhamnosus (47715, gm0408)			CGN (57530)
human	Lactobacillus rhamnosus (47715, gm0408)			DEFB4A (1673)
human	Lactobacillus rhamnosus GG (568703, gm0743)			TLR4 (7099)
human	Lactobacillus rhamnosus GG (568703, gm0743)			MAPK14 (1432)
human	Lactobacillus rhamnosus GG (568703, gm0743)			IKBKE (9641)
human	Lactobacillus rhamnosus GG (568703, gm0743)			MIR146A (406938)
human	Lactobacillus rhamnosus GG (568703, gm0743)			MIR155 (406947)
human	Lactobacillus rhamnosus GG (568703, gm0743)			CXCL8 (3576)
human	Ruminococcus gnavus E1 (935582, gm1146)			MUC1 (4582)
human	Ruminococcus gnavus E1 (935582, gm1146)			MUC2 (4583)
human	Ruminococcus gnavus E1 (935582, gm1146)			MGAT3 (4248)
human	Ruminococcus gnavus E1 (935582, gm1146)			B4GALT1 (2683)
human	Ruminococcus gnavus E1 (935582, gm1146)			ST6GAL1 (6480)

## Sheet: All compound
Metabolite (ID)
(20S)-Protopanaxadiol (11213350, CHEBI:75950)
(4S)-4-[(2E)-Oct-2-enoyloxy]-4-(trimethylazaniumyl)butanoate (53481667, CHEBI:176711)
(R)-3-(4-Hydroxyphenyl)lactate (9548632, CHEBI:10980)
10-Keto-12Z-octadecenoic acid (24970825)
10-Oxo-11-octadecenoic acid (10308378)
11-Methoxycurvularin (10381440)
2-(4-Hydroxyphenyl)propionic acid, (2S)- (6971268)
2,3-Bis(3,4-dihydroxybenzyl)butyrolactone (500189)
2,3-Dihydroxypropyl (E)-3-(3,4-dihydroxyphenyl)prop-2-enoate (5315606)
2,4-Dioxopentanedioic acid (444873, CHEBI:42056)
20(R)-Ginsenoside Rh2 (54580480)
2-Amino-1-methyl-6-phenylimidazo[4,5-b]pyridine (1530, CHEBI:76290)
2-Hydroxy-3-(4-hydroxyphenyl)propanoic acid (9378, HMDB0000755, CHEBI:17385)
2-Hydroxy-3-(5-hydroxy-1H-indol-3-yl)propanoic acid (192215)
2-Imino-1-methylimidazolidin-4-one (588, HMDB0000562, CHEBI:16737)
3-(3,4-Dihydroxyphenyl)-2-hydroxypropanoic acid (439435, HMDB0003503, CHEBI:17807)
3-(3-Hydroxyphenyl)propanoic acid (91, HMDB0000375, CHEBI:1427)
3-(4-Hydroxyphenyl)propionic acid (10394, HMDB0002199, CHEBI:32980)
3,4-Dihydroxybenzoic acid (72, CHEBI:36062)
3,4-Dihydroxyphenylacetic acid (547, HMDB0001336, CHEBI:41941)
3-Hydroxy-4-methoxybenzenepropanoic acid (2752054, HMDB0131138)
3-Hydroxybenzoic acid (7420, HMDB0002466, CHEBI:30764)
3-Hydroxyphenethyl alcohol (83404)
3-Indolepropionic acid (3744, HMDB0002302, CHEBI:43580)
3-Phenylpropionic acid (107, CHEBI:28631)
4-Hydroxy-(3',4'-dihydroxyphenyl)-valeric acid (52920332, HMDB0041679, CHEBI:137478)
4-Hydroxybenzoic acid (135, HMDB0000500, CHEBI:30763)
4-Hydroxyphenylacetic acid (127, HMDB0000020, CHEBI:18101)
4-Pyridoxic acid (6723, HMDB0000017, CHEBI:17405)
5-(3,4-Dihydroxyphenyl)-valerolactone (45093073)
6,7,4'-Trihydroxyisoflavone (5284649, HMDB0031715, CHEBI:74957)
6'-Hydroxy-O-desmethylangolensin (20601635, HMDB0041695, CHEBI:88662)
7-Hydroxy-5-methyl-3-phenyl-6,7,8,9-tetrahydropyrido[3',2':4,5]imidazo[1,2-a]pyrimidin-5-ium chloride (129849310)
8-Prenylnaringenin (480764, CHEBI:50207)
Acetate (175, CHEBI:30089)
Acetyl phosphate(2-) (4183249, CHEBI:22191)
Aglycone (CHEBI:166892)
Alanine (5950, HMDB0062251, CHEBI:16977)
Apigenin (5280443, HMDB0002124, CHEBI:18388)
Arctigenin (64981, CHEBI:391051)
Asparagine (6267, HMDB0000168, CHEBI:17196)
beta-D-Fructofuranose (439709, CHEBI:28645)
beta-D-Gal-(1->4)-beta-D-GlcNAc-(1->3)-beta-D-Gal-(1->4)-D-Glc (9831622, HMDB0006567, CHEBI:60239)
Bile acid (439520, CHEBI:22868)
Butyrate (104775, CHEBI:17968)
Caffeic acid (689043, HMDB0001964, CHEBI:16433)
Chrysin (5281607, HMDB0036619, CHEBI:75095)
Creatine (586, HMDB0000064, CHEBI:16919)
Cystine (595, CHEBI:17376)
Daidzein (5281708, HMDB0003312, CHEBI:28197)
Deoxycholic acid (222528, HMDB0000626, CHEBI:28834)
D-Glucuronic Acid (94715, HMDB0000127, CHEBI:42717)
Dihydrocaffeic acid (348154, HMDB0000423, CHEBI:48400)
Dihydrodaidzein (176907, HMDB0005760, CHEBI:75842)
Dihydroglycitein (101101166, CHEBI:174736)
D-Lactic acid (61503, HMDB0001311, CHEBI:42111)
DL-Alanine (602, HMDB0062251, CHEBI:16449)
Enterodiol (115089, HMDB0005056, CHEBI:544560)
Equol (91469, HMDB0002209, CHEBI:428126)
Ethyl phenyllactate, (-)- (9877619, HMDB0032618)
Folic acid (135398658, HMDB0000121, CHEBI:27470)
Genistein (5280961, HMDB0003217, CHEBI:28088)
Ginsenoside Rh2 (119307, CHEBI:77147)
Ginsenoside-Rd (24721561, HMDB0035778)
Glutathione (124886, HMDB0000125, CHEBI:16856)
Glycerol (753, HMDB0000131, CHEBI:17754)
Glycine (750, HMDB0000123, CHEBI:15428)
Glycitein (5317750, HMDB0005781, CHEBI:542494)
Glycocholic acid (10140, HMDB0000138, CHEBI:17687)
Hesperetin dihydrochalcone (147608, HMDB0128062)
Histidine (6274, HMDB0000177, CHEBI:15971)
Hydroquinone (785, HMDB0002434, CHEBI:17594)
Hydroxyquercitrin (129887767)
Indole-3-carboxaldehyde (10256, HMDB0029737, CHEBI:28238)
Indole-3-lactic acid (92904, CHEBI:24813)
Isobutyric acid (6590, HMDB0001873, CHEBI:16135)
Isoquercitrin (5280804, HMDB0037362, CHEBI:68352)
Kaempferol (5280863, HMDB0005801, CHEBI:28499)
Lactate (91435, CHEBI:24996)
Lacto-N-tetraose (440993, HMDB0006566, CHEBI:30248)
L-Cysteine (5862, HMDB0000574, CHEBI:17561)
Leucine (6106, HMDB0000687, CHEBI:15603)
Leucocianidol (71629, CHEBI:15758)
l-Isoleucine (6306, HMDB0000172, CHEBI:17191)
Lithocholic acid (9903, HMDB0000761, CHEBI:16325)
Malic acid (525, CHEBI:6650)
Naringenin (439246, HMDB0002670, CHEBI:50202)
Naringenin chalcone (5280960, HMDB0029631, CHEBI:15413)
Norathyriol (5281656, CHEBI:7622)
O-Desmethylangolensin (89472, HMDB0004629, CHEBI:88902)
Oxalacetic acid (970, HMDB0000223, CHEBI:30744)
Palmitic acid (985, HMDB0000220, CHEBI:15756)
Phenolic acid (CHEBI:166890)
Phenylacetic acid (999, HMDB0000209, CHEBI:30745)
Phloretin (4788, HMDB0003306, CHEBI:17276)
Phloroglucinol (359, HMDB0013675, CHEBI:16204)
Pipecolic acid (849, HMDB0000070, CHEBI:17964)
Platycodin D (162859, CHEBI:70436)
Ponciretin (25201019)
Proline (145742, HMDB0000162, CHEBI:17203)
Propanol (1031, CHEBI:28831)
Propionate (104745, CHEBI:17272)
Protopanaxadiol (9920281, CHEBI:76237)
Pyruvate (107735, CHEBI:15361)
Quercetin (5280343, HMDB0005794, CHEBI:16243)
Quercimeritrin (5282160, CHEBI:28529)
Quercitrin (5280459, HMDB0033751, CHEBI:17558)
Quinic acid (6508, HMDB0003072, CHEBI:17521)
Secoisolariciresinol (65373, HMDB0013692, CHEBI:65004)
Serine (5951, HMDB0000187, CHEBI:17115)
Succinate (160419, CHEBI:30031)
Tartaric acid (875, HMDB0062642, CHEBI:15674)
Trimethylamine oxide (1145, HMDB0000925, CHEBI:15724)
Ursodeoxycholic acid (31401, HMDB0000946, CHEBI:9907)

## Sheet: All compounds and their target 
Metabolites	Gene ID	Smile ID
(20S)-Protopanaxadiol (11213350, CHEBI:75950)	Soat1	CC(=CCC[C@](C)([C@H]1CC[C@@]2([C@@H]1[C@@H](C[C@H]3[C@]2(CC[C@@H]4[C@@]3(CC[C@@H](C4(C)C)O)C)C)O)C)O)C
	Hsd11b2
	CD81
	Polb
	CRYAB
	gag
	IL1B
	Lss
	HSD11B2
	PTPN1
	PYGM
	AKR1B10
	PTPN2
	CES2
	Hsd11b1
	PLCG1
	POLB
	PTPN1
	AR
	CYP19A1
	ESR1
	HSD11B1
	SLC6A4
	HMGCR
	CYP51A1
	NR1I3
	ACHE
	ATP12A
	SLC6A2
	CHRM2
	NR1H3
	NPC1L1
	CYP2C19
	VDR
	RORC
	ESR2
	HSD11B2
	SHBG
	BCHE
	UGT2B7
	CALCRL
	CES2
	CCR1
	PDE10A
	PTK6
	MDM2
	EPHX2
	PRKCG
	PRKCD
	PRKCB
	PRKCE
	F10
	CXCR3
	P2RY12
	MAPK14
	NR1I2
	CYP24A1
	EPHB4
	SQLE
	KCNA3
	CHEK1
	PDE2A
	POLB
	PTPRF
	ACP1
	AKR1B10
	GPR55
	GPR18
	ESRRA
	ESRRB
	PTPN2
	REN
	HTR2B
	ADRA2C
	LIMK1
	PRKCQ
	MET
	TNK2
	TTL
	ERBB2
	GSK3B
	GSK3A
	P2RX3
	PSEN2 PSENEN NCSTN APH1A PSEN1 APH1B
	AURKA
	TACR1
	MCHR1
	TACR2
	MDM4
	S1PR3
	S1PR1
	KDR
	CTSS
	HCRTR2
	HCRTR1
	SMO
	ALK
	PTGS2
	SREBF2
	IL6ST
	CD38
	CYP26A1
	NR1H4
	CCND1 CDK4
	CCNE2 CDK2 CCNE1
	CDK6
	F2R
	DGAT1
	CCNT1
	HSP90AA1
	PDK1
	FNTA FNTB
	MAP3K14
	ITGAL ICAM1 ITGB2
	PTPN6
	OPRM1
	OPRD1
(4S)-4-[(2E)-Oct-2-enoyloxy]-4-(trimethylazaniumyl)butanoate (53481667, CHEBI:176711)	SLC25A20	C[N+](C)(C)C[C@@H](CC(=O)[O-])O
	ANXA10
	Cpt1b
	Cpt2
	CPT2
	GPM2
	BBOX1
	MMP2
	MMP8
	MMP3
	MMP9
	SLC6A1
	GABBR2 GABBR1
	SLC6A11
	SLC6A13
	CPT2
	CA2
	CA1
	CA12
	CA9
	SLC1A1
	MMP1
	PTK2B
	DPP7
	FBP1
	SLC6A3
	GRIK1
	GRIA1
	ADORA3
	GRIK5
	GRM4
	GRM3
	GRIA4
	GRM5
	GRM8
	GRIK2
	GRIK3
	GRM1
	GRM7
	GRIA2
	GRM6
	GRM2
	MME
	KISS1R
	PIN1
	SLC6A12
	PLA2G2C
	PLA2G10
	PTGER4
	PTGER2
	GBA
	EPHX2
	PTGER3
	SLC1A2
	ARG1
	KMO
	GABRA1 GABRB2 GABRG2
	GABRA3 GABRB2 GABRG2
	GABRA2 GABRB2 GABRG2
	GABRR1
	LPAR3
	FOLH1
	NAALAD2
	CTSK
	PLA2G4A
	CACNA2D1
	REN
	NR1H4
	SLC25A20
	ODC1
	FUCA1
	KDM4E
	KDM6B
	CHRM1
	CHRM2
	CHRM3
	HSD17B3
	FUCA2
	PYGL
	CPB2
	CPN1
	AR
	DPP4
	ANPEP
	ENPEP
	KDM2A
	PHF8
	KDM5C
(R)-3-(4-Hydroxyphenyl)lactate (9548632, CHEBI:10980)	YARS1	C1=CC(=CC=C1C[C@H](C(=O)[O-])O)O
	CPA3
	Gria1
	GRIA1
	MME
	USP4
	PRE7
	ALDH5A1
	pobA
	Th
	MME
	Adrb2
	lasB
	CPA1
	CPA1
	ACE
	USP5
	ABAT
	TAAR1
	CSK
	tat
	Oprm1
	ACE2
	Ace
	Adrb3
	Slc15a2
	PSMA1
	PSMA2
	PSMA3
	PSMA4
	PSMA5
	PSMA6
	PSMA7
	PSMB11
	PSMB3
	PSMB4
	PSMB6
	PSMB7
	PSMA8
	PRE2
	PSMB10
	TH
	blaIMP-1
	Pam
	ENPEP
	MB
	IL1B
	PSMB9
	NPY4R
	Slc22a20
	PSMB1
	CHRND
	Mme
	Oprd1
	MME
	OPRM1
	TYR
	ACE
	PSMB2
	CAN2
	PSMB8
	ca
	PLG
	LAP3
	SOAT1
	Slc22a6
	nanA
	PCNA
	sssIM
	ESR2
	NMUR2
	Esr2
	CTBP2
	mtcA1
	ESR1
	SOAT2
	Slc22a6
	MDM4
	NAALAD2
	CA3
	NCE103
	Oprd1
	ANPEP
	PSMB5
	ERAP2
	ALB
	PTGS2
	HSD17B3
	CELA1
	blm
	ESRRG
	ADRB2
	OPRM1
	Abat
	OPRD1
	ESR1
	ESR2
	CA2
	PPARG
	PPARA
	FYN
	LCK
	EGFR
	PTGDR2
	CA12
	THRA
	THRB
	LAP3
	KDM4E
	PPARD
	HSD11B1
	FFAR1
	TPMT
	FBP1
	AKR1B1
	GRB2
	PTGS2
	SLC7A5
	KDM4A
	ECE1
	CXCL8
	SLC22A6
	TH
	FUCA1
	SLC6A2
	CPA3
	CYP1A2
	CPB2
	KDM3A
	KDM6B
	FTO
	KDM4C
	AMPD3
	PTPRA
	SHBG
	TYR
	SRD5A2
	MTNR1A
	ITGAL ICAM1 ITGB2
	GSR
	CYP19A1
	NR1H4
	APEX1
	KDM2A
	AR
	NGFR
	PTGFR
	CTBP2
	GPR17
	PDCD4
	GABRA1 GABRB2 GABRG2
	EDNRB
	EDNRA
	GABBR2 GABBR1
	GRIK1
	OGA
	GPR35
	CDA
	CES2
	ERCC5
	FEN1
	COMT
	AKR1C2
	AKR1C1
	HSD17B3
	ADRA2A
	ADRA2C
	ADRA2B
	CHRM2
	CHRM1
	HTR2C
	SLC6A4
	TACR2
	SLC6A3
	CHRM3
	ADRB3
	TAAR1
	DPP4
	RORC
	CA13
	FOLH1
	GABBR1
	KIF11
	GRIA1
	GRIK5
	GRIA4
	GRIK3
	GRIA2
	ACHE
	ADA
	DBF4 CDC7
	CASP3
	MIF
	PHF8
	KDM5C
10-Keto-12Z-octadecenoic acid (24970825)	Trpv2	CCCCCC/C=C/C(=O)CCCCCCCCC(=O)O
	cqsS
	PPARG
	OXER1
	Lpar1
	PLCG1
	PLA2G4A
	est1
	BBOX1
	P2RY10
	Slco2b1
	Slco2a1
	ALOX15
	LPAR4
	CERT1
	Lpar4
	SLC25A20
	ACER2
	SLCO2A1
	Cnr1
	CYP4F2
	PLA2G4B
	LPAR3
	Top1B
	GPR174
	Jhe
	GABRQ
	Slc6a13
	Msr1
	PLA2G2C
	Cdc25b
	ACAT
	Cpt1b
	FAAH
	Gba
	LPAR6
	Faah
	Cnr1
	Faah
	GPR34
	Pla2g2a
	PLA2G2A
	luxR
	Poli
	PLA2G5
	lasR
	Cnr2
	Slco2a1
	GSTK1
	PLA2G10
	lpxC
	PAM
	PAFAH1B2
	Ptger2
	SPTLC2
	LPAR2
	Pla2g5
	Slc22a6
	Ces2c
	CES2
	LPAR1
	PLA2G1B
	Pla2g2a
	CES1
	CPT1
	FABP3
	luxP
	PRP19
	traR
	FabI
	GSTM1
	DPEP1
	Mgll
	KDM7A
	POT1.5
	Prkaca
	POLH
	PRKCA
	EPHX2
	PRKCA
	CDC25C
	KCNK2
	phzR
	SLC6A11
	HMGCR
	MT-ND1
	CNR1
	Prkch
	Ptger1
	SLC22A6
	Ptger2
	Abcc2
	POLK
	KDM5A
	PTGER2
	NOD1
	TBXA2R
	TLR2
	resT
	ENPP2
	SLC22A8
	GNAI1
	Ptger4
	PTGFR
	TRPV1
	Ptger3
	DNM1
	TBXAS1
	Gabrg1
	PTGFR
	GPR18
	PLA2G2A
	fabG
	Ephx1
	CDC25A
	PTGER4
	CNR2
	CDC25B
	LOX1.1
	S1PR2
	Slc22a6
	NAAA
	PTGER3
	fabZ
	ENPEP
	PPARG
	agrC
	POLB
	GSTA1
	lef
	Ptgfr
	KDM4A
	Slc6a11
	Enpp2
	KDM2A
	PPARA
	HSD17B3
	DAGLA
	Ptger4
	ALOX12
	Gpr34
	Cpt1a
	EPHX1
	Cacna1c
	LTB4R
	PTGIR
	GABBR2
	POLA1
	PRKCE
	GABBR1
	Prep
	SPHK1
	Cnr2
	PPARD
	P2ry10
	EcR
	TOP1
	FABP4
	FAAH
	PPARG
	PPARA
	TERT
	FABP5
	PPARD
	FABP1
	PTPN1
	HSD11B1
	CDC25A
	PTPN11
	PTGES
	FABP3
	SCD
	ALOX5
	PRKCH
	AKR1B10
	FNTA FNTB
	FFAR1
	CYP19A1
	NPC1L1
	NR3C1
	SERPINA6
	SHBG
	CYP17A1
	PTPN2
	SRD5A2
	HSD11B2
	MAPK3
	NOS2
	AR
	BCHE
	BACE1
	PTGS1
	ADORA3
	PGR
	FDFT1
	PREP
	PTPN6
	CDC25B
	SIGMAR1
	PDE4D
	PTGS2
	LTB4R
	HMGCR
	ESR2
	NR3C2
	PTGIR
	CNR1
	POLB
	NR1H3
	PTGER2
	PTPRF
	ACP1
	PLA2G1B
	SLC6A3
	CD81
	NR1I2
	HSD17B3
	NR1I3
	SRD5A1
	ALOX12
	G6PD
	CYP51A1
	PTGER1
	ESR1
	CYP26B1
	CYP26A1
	FFAR4
	GLRA1
	ENPP2
	ATP12A
	GPBAR1
	GCG
	MME
	PTGDR2
	RORC
	RORA
	IL6
	GLUL
	CES1
	CES2
	GCGR
	EPHX1
	DGAT1
	MDM2
	PTGER4
	HSD17B2
	ITGAV ITGB3
	TSPO
	TOP1
	ADORA1
	GRM2
	S1PR1
	THRA
	THRB
	CTSS
	SLC10A2
	ITGAL ICAM1 ITGB2
10-Oxo-11-octadecenoic acid (10308378)	NFE2L2 (4780)	CCCCCC/C=C/C(=O)CCCCCCCCC(=O)O
	HMOX1 (3162)
11-Methoxycurvularin (10381440)	FUT4	C[C@H]1CCCC(CC(=O)C2=C(CC(=O)O1)C=C(C=C2O)O)OC
	TAS2R31
	ZWF1
	ST3GAL3
	PGAM1
	fabG
	PGD
	fabZ
	FUT7
	ACVRL1
	Nr3c2
	CBS
	CBR1
	sssIM
	PDGFRA
	MAP3K7
	CYP1B1
	PLAA
	MAP2K6
	NR4A1
	BRD4
	CREBBP
	MME
	MMP3
	MMP9
	MMP1
	ADAM17
	MMP13
	MMP7
	MMP8
	DRD4
	DRD3
	PIM1
	CA3
	CA13
	CA1
	CA14
	CA4
	CA5B
	CA5A
	MTOR
	PIK3CA
	EIF2AK3
	CCNB3 CDK1 CCNB1 CCNB2
	CDK2 CCNA1 CCNA2
	RPS6KA3
	TNK2
	PARP1
	ALPL
	PLAA
	IMPDH2
	JAK1
	SLC22A12
	JAK3
	TYK2
	JAK2
	PLEC
	NPY5R
	PRKDC
	GABRB3 GABRA3 GABRG2
	GABRB3 GABRG2 GABRA1
	GABRB3 GABRG2 GABRA5
	GABRA2 GABRB3 GABRG2
	GABRG2 GABRB3 GABRA6
	CPB1
	TNKS2
	TNKS
	PTAFR
	PIK3CB
	PIK3CG
	PIK3C2B
	STAT3
	KDM1A
	ERN1
	HDAC2
	HDAC1
	CAPN1
	CDK9
	LRRK2
	COMT
	PLA2G7
	SCN9A
	CDK2
	CDK1
	CDK5R1 CDK5
	SLC5A1
	BRD2
	PDE10A
	IDO1
	XIAP
	PSEN2 PSENEN NCSTN APH1A PSEN1 APH1B
	PIK3CD
	GABRA5
	TOP2A
	ABCC9
	EGFR
	RET
	LCK
	CASP8
	MAPK1
	MKNK2
	ALK
	CASP1
	EPHB4
	ABL1
	HCK
	ESR2
	ADRA2A
	CCNE2 CDK2 CCNE1
	HSP90AA1
	ADORA2A
	ADORA2B
	TRPM8
	TDP2
	PDE4B
	IKBKB
	CACNA1C
	EWS-Fli1
	HTR2A
2-(4-Hydroxyphenyl)propionic acid, (2S)- (6971268)	Adrb3	CC(C1=CC=C(C=C1)O)C(=O)O
	Adrb2
	reverse transcriptase
	ALDH5A1
	Ptgs1
	Kynu
	Slc22a6
	Slc22a7
	PTGS1
	YARS1
	Fabp1
	lsdA
	ABAT
	Slc22a20
	SLC15A2
	MME
	MB
	CXCL8
	Slc22a6
	PPO1
	MME
	helD
	TAAR1
	Slc15a2
	Esrrg
	GLI1
	Cacna2d1
	PTGS1
	ca
	Slc1a6
	TYR
	PTGS2
	KYNU
	vanX
	Ace
	NAALAD2
	ALB
	CA3
	ESR2
	PTGS2
	blaIMP-1
	NMUR2
	CPA1
	ACE
	RNASEH1
	ESR1
	Alox5
	SOAT1
	CA14
	psbA
	sssIM
	Ace
	CA7
	PTGS1
	SLC7A11
	GABRB1
	CTBP2
	blaIMP-1
	ADRB2
	SOAT2
	Slc6a5
	Esr2
	ESRRG
	ESRRB
	CYP11B1
	CPB1
	HSD17B3
	blm
	CELA1
	CPN1
	TAS1R1
	MMP16
	Dgat1
	Ca15
	Grm6
	CAN2
	Abat
	PCNA
	AKR1B1
	CA2
	PTGS1
	PTGS2
	ESR2
	YWHAG
	ESR1
	CXCL8
	CPA1
	MIF
	AKR1C3
	KDM3A
	KDM6B
	FTO
	KDM4A
	KDM4C
	KCNN4
	CES2
	SRD5A2
	AR
	HTR6
	ESRRG
	FOLH1
	FBP1
	GABRA1 GABRB2 GABRG2
	ACE
	PTGDR2
	PTPRC
	NGFR
	KMO
	DAO
	CHRM4
	CHRM2
	CHRM1
	CHRM3
	CA4
	HTR2B
	GABRB3 GABRG2 GABRA1
	SLC6A2
	HTR2C
	TPMT
	CNR1
	CNR2
	GPR17
	SLC13A5
	MME
	SHBG
	KDM2A
	PARP1
	FYN
	LCK
	CES1
	ELANE
	THRA
	THRB
	PAM
	PLA2G4B
	BACE1
	ALDH5A1
	ABAT
	CA1
	ECE1
	MMP1
	MMP2
	KDM4E
	GABRR1
	ALPL
	PYGL
	AMPD3
	PYGM
	REN
	TRPA1
	AKR1C2
	ADRA2A
	ADRA2C
	ADRA2B
	SLC6A4
	TACR2
	ADRB3
	ADORA3
	TAAR1
	CA7
	CA3
	CA6
	CA12
	CA14
	CA9
	CA5B
	CA5A
	PPARG
	ATIC
	ALOX12
	HTR3A
	RORC
	HSPA1A
	MGAM
	SI
	SLC16A1
	SLC7A11
	ANPEP
2,3-Bis(3,4-dihydroxybenzyl)butyrolactone (500189)	pol	C1C(C(C(=O)O1)CC2=CC(=C(C=C2)O)O)CC3=CC(=C(C=C3)O)O
	CYP19A1
	ERCC1
	ERCC4
	Ltb4r
	TPR
	Arpp19
	Adora2b
	pqsD
	IGFBP5
	NDUFAB1
	NDUFAF1
	NDUFA1
	NDUFA2
	NDUFA3
	NDUFA5
	NDUFA6
	NDUFA7
	NDUFA8
	NDUFA9
	NDUFA10
	NDUFA11
	NDUFA12
	NDUFA13
	NDUFB1
	NDUFB2
	NDUFB3
	NDUFB4
	NDUFB5
	NDUFB6
	NDUFB7
	NDUFB8
	NDUFB9
	NDUFB10
	NDUFB11
	NDUFC1
	NDUFC2
	NDUFAF2
	NDUFAF3
	NDUFAF4
	NDUFS1
	NDUFS2
	NDUFS3
	NDUFS4
	NDUFS5
	NDUFS6
	NDUFS7
	NDUFS8
	NDUFV1
	NDUFV2
	NDUFV3
	MT-ND1
	MT-ND2
	MT-ND3
	MT-ND4L
	MT-ND5
	MT-ND6
	NDUFA4L2
	ALOX15
	LOX1.1
	Naaa
	NDUFA4
	SHBG
	KDM4E
	IGFBP3
	MT-ND4
	nanA
	YWHAG
	ALOX15
	Dbh
	mAChR-A
	DBH
	ALOX12
	Iap
	CYP19A1
	SHBG
	ESR1
	ESR2
	HSD17B2
	MAP2K1
	SLC6A2
	NR1H3
	NR1H2
	ALOX5
	NOX4
	LYPLA1
	LYPLA2
	HSD17B1
	BRAF
	KIT
	CHRNA7
	FGFR1
	ABCG2
	INSR
	JUN
	PPARD
	SLC6A3
	SGK1
	GCGR
	CLK1
	BCL2
	SRC
	DYRK1A
	DYRK1B
	HSD17B14
	HTR1A
	VCP
	DNM1
	CA13
	F2
	IGF1R
	ALOX15
	CAPN1
	KDR
	PIK3CG
	PRSS1
	ERN1
	RAF1
	ALOX12
	AURKA
	RPS6KA5
	WEE1
	UPP1
	CDK5R1 CDK5
	PTPN11
	IGFBP3
	KDM1A
	F3
	CCNB3 CDK1 CCNB1 CCNB2
	APP
	MTOR
	SYK
	CHEK1
	TTR
	LTB4R
	OXSR1
	PIK3C2G
	TRPM6
	PIP4K2C
	ERBB2
	ABL1
	CDK1 CCNB1
	CCNE1 CDK2
	PIP5K1C
	MAP2K3
	CSNK1G1
	CSNK1G2
	RPS6KA1
	PRKD3
	CSNK1A1
	CSNK1D
	JAK1
	MAP2K4
	ERBB4
	CCNE1 CDK3
	TYMP
	PIK3CD
	PIK3CB
	ROCK1
	PI4KB
	TYK2
	CSNK2A1
	AAK1
	STK16
	TTK
	PIK3CA
	CSNK2A2
	GRK2
	PRKACA
	CLK4
	MKNK2
	CLK2
	CLK3
	GAK
2,3-Dihydroxypropyl (E)-3-(3,4-dihydroxyphenyl)prop-2-enoate (5315606)	CXCL12	C1=CC(=C(C=C1/C=C/C(=O)OC[C@H](CO)O)O)O
	Alox15b
	17HSDcl
	pol
	Mmp2
	Adra2a
	Adra2c
	Alox15
	TUBA4A
	MYOC
	APP
	AKR1B10
	sssIM
	Hsd17b3
	Alox5
	TCTS-154
	MAPT
	DNM1
	CA6
	GLO1
	CA5B
	NFKB1
	CA5A
	Akr1b1
	gag-pol
	Ca13
	pol
	Map2k1
	CA7
	Ptgs2
	CA14
	KCNK2
	NR0B2
	AKR1B1
	AKR1C4
	Hsd11b1
	Tyr
	IKBKG
	TUBB1
	CA4
	TTR
	HSPE1
	HSPD1
	FOS
	mdh
	ABCG2
	COMT
	CA13
	PPO2
	YWHAG
	N1L
	MMP9
	stxA
	Iap
	JUN
	ODC1
	MMP1
	NFE2L2
	CA3
	pqsD
	KDM4E
	EP300
	ALOX5
	MMP2
	XDH
	RELA
	LOX1.1
	ALPI
	CA12
	CA2
	CA1
	CA12
	CA9
	CA14
	ESR1
	AKR1B1
	AKR1C4
	AKR1B10
	AKR1C3
	MMP13
	MMP12
	LCK
	MAPK1
	EGFR
	PTGS1
	FYN
	TTR
	MAOB
	CA7
	MMP9
	MMP1
	MMP2
	ERBB2
	SLC5A2
	MGLL
	CA5A
	AKR1C2
	PNP
	CA6
	PTPN1
	TYR
	SLC6A2
	CA13
	CA4
	TLR4
	ALOX5
	SLC5A1
	HRAS
	IGFBP3
	HPRT1
	SLC28A3
	ADK
	SLC29A1
	ADAM17
	AHCYL1
	ADORA3
	MAP2K1
	PRKCD
	MMP7
	MMP8
	HSPA8
	HSPA5
	FUCA1
	IGFBP5
	TDP1
	AHCY
	ESR2
	CDC25B
	ELANE
	APP
	GBA
	FNTA FNTB
	GSTP1
	GSTM2
	SLC5A4
	PRKCA
	MCL1
	CA5B
	PIM1
	SELL
	SELE
	METAP2
	SELP
	SLC28A2
	CXCR2
	DHODH
	FDFT1
	LGALS3
	LGALS9
	PYGL
	ADA
	DNMT1
	EPHX2
	RNASEH1
	MET
	ADORA1
	EIF4H
	PABPC1
	KIT
	FLT3
	KDR
	MAP2K2
	MAPKAPK5
	TYK2
	ALK
	CASP3
	MARS
	YARS
	TARS
2,4-Dioxopentanedioic acid (444873, CHEBI:42056)	HAO1	C(C(=O)C(=O)O)C(=O)C(=O)O
	ERCC5
	FEN1
	PA
	P4ha1
	pol
	Kmo
	PA
	ABAT
	Slc22a6
	RNASEH1
	KDM6B
	PHF8
	KDM3A
	blaIMP-1
	EGLN1
	SLC22A6
	ACLY
	HAO1
	HMGCR
	FDFT1
	KDM2A
	PHF8
	KDM5C
	FNTA FNTB
	CHRNA7
	GRIK1
	GRIA1
	ADORA3
	GRIK5
	SLC1A1
	GRM4
	GRM3
	GRIA4
	GRM5
	GRM8
	GRIK2
	GRIK3
	GRM1
	GRM7
	GRIA2
	GRM6
	GRM2
	NPC1L1
	FOLH1
	FABP4
	PPARA
	FABP3
	FABP5
	PPARD
	FFAR1
	FABP2
	NR1H4
	G6PD
	GPBAR1
	HSD11B1
	PTGER2
	PTGFR
	HDAC3
	AR
	VDR
	CYP19A1
	GABRA2 GABRB2 GABRG2
	CDC25A
	AKR1B10
	POLB
	RNPEP
	CA1
	CA9
	UGT2B7
	SLC1A2
	SERPINA6
	SHBG
	HSD17B3
	GABBR1
	ACE
	SLC6A12
	HSD11B2
	PEPD
	CA2
20(R)-Ginsenoside Rh2 (54580480)	Slco1b2	CC(=CCC[C@](C)([C@H]1CC[C@@]2([C@@H]1[C@@H](C[C@H]3[C@]2(CC[C@@H]4[C@@]3(CC[C@@H](C4(C)C)O[C@H]5[C@@H]([C@H]([C@@H]([C@H](O5)CO)O)O)O)C)C)O)C)O)C
	gag
	LGALS4
	LGALS8
	F3
	FGF1
	Abcc2
	FGF2
	LGALS9
	IL2
	PRKAA2
	PRKAG1
	STAT3
	IL2
	PTAFR
	HSP90AA1
	PSEN2 PSENEN NCSTN APH1A PSEN1 APH1B
	VEGFA
	FGF1
	FGF2
	HPSE
	ATP1A1
	RORC
	TYMS
	BCL2L1
	TYRO3
	LGALS4
	LGALS3
	LGALS8
	CDK1
	S1PR3
	S1PR1
	PLK1
	MMP13
	MMP1
	ADAM17
	JAK2
	HSD11B2
	KDR
	BACE1
	ACACB
	HDAC6
	CYP2C9
	CYP3A4
	CYP2C19
	FLT1
	HDAC1
	ALOX5AP
	MAPK14
	PDK1
	NR3C1
	MMP9
	ESRRA
	ESRRB
	HDAC2
	NCOR2 HDAC3
	HDAC5
	HDAC8
	HDAC11
	HDAC10
	DGAT1
	HSD11B1
	AURKB
	RPS6KB1
	AURKA
	L3MBTL3
	ADRB2
	ADRB1
	ADRB3
	LCK
	HCK
	AKT2
	MMP2
	AKT1
	MAOA
	MAOB
	REN
	CSF1R
	KIT
	FLT3
	PFKFB3
	ACP1
	MET
	NPC1
	SCD
	PLA2G4A
	AR
	HRH3
	PTPN11
	LPAR4
	SAE1
	HTR1A
	SLC6A4
	CDC25C
	EP300
	KAT2B
	S1PR5
	S1PR4
	ACHE
	MAPK8
	MAPK9
	MAP4K4
	ADORA2A
	PRF1
	SLC6A3
	HDAC3
	ITGAV ITGB3
	ESR1
	CCR1
	CCR3
	VCP
	BCHE
2-Amino-1-methyl-6-phenylimidazo[4,5-b]pyridine (1530, CHEBI:76290)	NOS3	Cn1c(N)nc2ncc(cc12)-c1ccccc1
	Asic3
	Adora2b
	Pdgfrb
	Mapk1
	Src
	GLO1
	Adk
	HPGDS
	PDE6A
	ASIC3
	tgt
	KAT2A
	Htr3a
	CXCL8
	ADORA1
	Slc22a2
	PI4KA
	Slc6a9
	KLK5
	Slc22a1
	EGLN3
	STAT1
	BMP4
	SRC
	GRM4
	EGFR
	CA7
	CA13
	MAPKAPK2
	KDR
	HTR7
	MGLL
	CYP17A1
	QPCT
	MAP3K14
	TAAR1
	TDO2
	KIF20A
	STAT3
	HRH1
	CA6
	HRH4
	TEK
	AR
	RCOR1 KDM1A
	KDM1A
	CSK
	CA3
	CA14
	CA4
	CA5B
	CA5A
	CDK1 CCNB1
	DHFR
	ADRA2A
	MAOA
	SLC6A2
	HTR2C
	SLC6A4
	CYP1A2
	CSF1R
	NTRK2
	ADRA2C
	NR3C2
	NR3C1
	PSEN2 PSENEN NCSTN APH1A PSEN1 APH1B
	CTSK
	CTSS
	NAMPT
	PLA2G7
	CDK6
	STS
	TBXAS1
	ADRA1A
	OPRD1
	MAPT
	FNTA FNTB
	PGGT1B FNTA
	HTR6
	GPER1
	ESR2
	PIK3C2G
	CLK2
	IRAK3
	BMPR1B
	DRD1
	HTR5A
	CEL
	SGK1
	IGF1R
	NTRK3
	PKM
	SLC6A9
	DYRK1A
	TYMP
	GRIA2
	LYN
	PBRM1
	SMARCA4
	CCNT1
	CCNB1
	CCND3
	CCNA2
	CCNE1
	PRF1
	HSP90B1
	CA2
	CA1
	CA9
	TERT
	LIMK1
	ATP4B ATP4A
	GCK
	ALPL
	ADRA2B
	GABRA5
	OXTR
	TSPO
	PABPC1
	SLC9A1
	DYRK2
	VDR
	HTR1A
2-Hydroxy-3-(4-hydroxyphenyl)propanoic acid (9378, HMDB0000755, CHEBI:17385)	YARS1	C1=CC(=CC=C1CC(C(=O)O)O)O
	CPA1
	MME
	CPA3
	Mme
	SLC7A5
	ACE2
	MME
	CPA1
	MME
	Mme
	blaIMP-1
	Gria1
	SLC15A1
	Adrb2
	Th
	ACE
	PRE7
	Kynu
	mgrA
	GRIA1
	Rnpep
	LAP3
	ALDH5A1
	Adrb3
	USP4
	murI
	pobA
	Slc15a2
	Oprm1
	Rnpep
	LAP3
	Ace
	Oprd1
	NAALAD2
	Ace2
	lasB
	ABAT
	USP5
	Slco1c1
	TAAR1
	LAP3
	ERAP2
	TH
	tat
	OPRM1
	PRE2
	Lnpep
	ENPEP
	ACE
	Slc22a20
	ANPEP
	CSK
	Pam
	Ctsh
	Ctsj
	Slc1a6
	MDM4
	PPARA
	TYR
	MB
	Oprd1
	IL1B
	Kmo
	CAN2
	DNPEP
	Ctsc
	KYNU
	ca
	ANPEP
	acpS
	Slc22a6
	CHRND
	Tacr1
	FOLH1
	blm
	PPARG
	SOAT1
	Cyp24a1
	PCNA
	Anpep
	CA3
	nanA
	RNPEP
	Slc22a6
	ESR2
	Cacna2d1
	tetX
	Ece1
	Folh1
	sssIM
	CTBP2
	ESR1
	Ppara
	NMUR2
	NCE103
	PAM
	MMEL1
	Esr2
	SOAT2
	LNPEP
	PRKCH
	ERAP1
	ALB
	Esrrg
	PTGS2
	AKR1B10
	PSMA1
	PSMA2
	PSMA3
	PSMA4
	PSMA5
	PSMA6
	PSMA7
	PSMB11
	PSMB3
	PSMB4
	PSMB6
	PSMB7
	PSMA8
	GLI1
	PSMB10
	Ca13
	PSMB1
	blaIMP-1
	Gria2
	NPEPPS
	OPRD1
	mtcA1
	Ace
	PRKCG
	ESRRB
	ALOX15
	PSMB9
	npr
	Grin2b
	CAPN2
	HSD17B3
	SLC22A6
	ADRB2
	CXCL8
	CASP1
	OPRL1
	PTGS1
	OPRM1
	ADRB2
	CTRB1
	Abat
	Trpa1
	CTSB
	PSMB2
	FFAR1
	CA5B
	Ca15
	PTPRA
	ESR1
	ESR2
	CA2
	PPARG
	PPARA
	EGFR
	FYN
	LCK
	CA12
	PTGDR2
	KDM4E
	THRA
	THRB
	LAP3
	PPARD
	TPMT
	HSD11B1
	FFAR1
	KDM4A
	AKR1B1
	FBP1
	PTGS2
	KDM3A
	KDM6B
	FTO
	KDM4C
	GRB2
	SLC7A5
	ECE1
	CXCL8
	SLC22A6
	TH
	FUCA1
	SLC6A2
	CPA3
	CYP1A2
	CPB2
	AMPD3
	ITGAL ICAM1 ITGB2
	PTPRA
	SHBG
	GRIK1
	TYR
	KDM2A
	SRD5A2
	CTBP2
	MTNR1A
	GSR
	CYP19A1
	NR1H4
	APEX1
	AR
	PDCD4
	NGFR
	OGA
	PTGFR
	AKR1C2
	AKR1C1
	GPR17
	CA13
	GABRA1 GABRB2 GABRG2
	EDNRB
	EDNRA
	MIF
	GABBR2 GABBR1
	GRIA4
	PTPN1
	CES2
	ERCC5
	FEN1
	COMT
	ALOX5
	GRIA1
	GRIK5
	DPP4
	GRIK3
	GRIA2
	CDA
	HSD17B3
	ADRA2A
	ADRA2C
	ADRA2B
	CHRM2
	CHRM1
	HTR2C
	SLC6A4
	TACR2
	SLC6A3
	CHRM3
	ADRB3
	TAAR1
	GPR35
	CASP3
	AHCY
	RORC
	PTGS1
	KIF11
	MMP9
	GABBR1
	FOLH1
2-Hydroxy-3-(5-hydroxy-1H-indol-3-yl)propanoic acid (192215)	SNCA	C1=CC2=C(C=C1O)C(=CN2)CC(C(=O)O)O
	SPR
	CYP51
	MPO
	ECE1
	MME
	RUVBL1
	UBA1
	Kynu
	ECE1
	HTR1D
	Ece1
	Ace
	TYR
	NMBR
	HTR1B
	MAGI3
	HTR1D
	BRS3
	5htr1d
	GABRB1
	Slc15a2
	Ednra
	Htr1b
	PRKAB2
	LNPEP
	Cckbr
	nrdE
	Mmp8
	lasB
	ST3GAL1
	ERAP2
	npr
	HTR1E
	CCKAR
	HTR1B
	TACR2
	MMP9
	ERAP1
	ACE
	KYNU
	sssIM
	ADAM12
	Ednrb
	TACR1
	MME
	HTR1A
	GPR84
	GUSB
	MMP2
	HTR7
	Gabra2
	SSTR1
	MTNR1A
	Htr1a
	Oprm1
	def
	Gabra5
	tat
	Gabra1
	Gabrb3
	Gabrb2
	GABRB2
	MTNR1B
	Timp3
	EDNRB
	TRPV1
	Gabrg2
	Mmp9
	MAP2K7
	HTR1D
	MME
	Htr1d
	LTA4H
	NS5B
	CCKBR
	Grin2b
	HTR5A
	Kmo
	MMP26
	MMP8
	CTBP2
	pqsD
	Abcc2
	EDNRA
	Faah
	CAPN1
	MDH2
	Tacr1
	Htr2c
	RAD51
	Pdgfra
	CTSL
	Slc6a4
	Tacr2
	NR3C1
	Trpm8
	Gabra3
	PCNA
	Oprd1
	MMP17
	Slc6a2
	MMP15
	NR4A1
	NR3C2
	DRD1
	Drd2
	SSTR3
	TPR
	HTR2C
	SLC6A2
	HTR2B
	HTR1A
	HTR2A
	HTR2C
	HTR7
	CA2
	CA3
	CA14
	CA13
	CA5B
	FYN
	CA7
	CA6
	CA5A
	KDM4E
	HTR1B
	HTR1D
	CPA1
[truncated: 16,349 more rows]

## Sheet: (20S)-Protopanaxadiol (11213350
Target Name	Description	P-Value	MaxTC
CC(=CCC[C@](C)([C@H]1CC[C@@]2([C@@H]1[C@@H](C[C@H]3[C@]2(CC[C@@H]4[C@@]3(CC[C@@H](C4(C)C)O)C)C)O)C)O)C
compound_1
SOAT1_RAT	Soat1	Sterol O-acyltransferase 1	0.001482	1
DHI2_RAT	Hsd11b2	Corticosteroid 11-beta-dehydrogenase isozyme 2	6.678e-41	0.32
CD81_HUMAN	CD81	CD81 antigen	2.671e-40	0.32
DPOLB_RAT	Polb	DNA polymerase beta	2.828e-37	0.37
Q43445_SOYBN		Methyltransferase	7.142e-37	0.29
PA2A1_ECHCA		Acidic phospholipase A2 EC-I	2.669e-26	0.32
PA2B1_NAJME		Basic phospholipase A2 1	2.669e-26	0.32
PA2BA_PROFL		Basic phospholipase A2 PLA-A	2.669e-26	0.32
CRYAB_HUMAN	CRYAB	Alpha-crystallin B chain	1.42e-25	0.32
Q77YG1_9HIV1	gag	Gag polyprotein	1.736e-24	0.3
IL1B_HUMAN	IL1B	Interleukin-1 beta	1.887e-15	0.29
LSS_RAT	Lss	Lanosterol synthase	1.693e-13	0.38
DHI2_HUMAN	HSD11B2	Corticosteroid 11-beta-dehydrogenase isozyme 2	4.652e-13	0.36
PTN1_HUMAN	PTPN1	Tyrosine-protein phosphatase non-receptor type 1	7.632e-11	0.4
PYGM_RABIT	PYGM	Glycogen phosphorylase, muscle form	2.088e-10	0.48
AK1BA_HUMAN	AKR1B10	Aldo-keto reductase family 1 member B10	1.324e-09	0.37
PTN2_HUMAN	PTPN2	Tyrosine-protein phosphatase non-receptor type 2	1.372e-09	0.34
EST2_HUMAN	CES2	Cocaine esterase	9.957e-09	0.35
DHI1_MOUSE	Hsd11b1	Corticosteroid 11-beta-dehydrogenase isozyme 1	1.499e-08	0.56
PLCG1_HUMAN	PLCG1	1-phosphatidylinositol 4,5-bisphosphate phosphodiesterase gamma-1	3.464e-08	0.32
DPOLB_HUMAN	POLB	DNA polymerase beta	8.593e-06	0.34
SwissTargetPrediction
Target	Common name	Uniprot ID	ChEMBL ID	Target Class	Probability*	Known actives (3D/2D)
Protein-tyrosine phosphatase 1B	PTPN1	P18031	CHEMBL335	Phosphatase	0.159289	29 / 49
Androgen Receptor	AR	P10275	CHEMBL1871	Nuclear receptor	0.109013	39 / 77
Cytochrome P450 19A1	CYP19A1	P11511	CHEMBL1978	Cytochrome P450	0.109013	3 / 91
Estrogen receptor alpha	ESR1	P03372	CHEMBL206	Nuclear receptor	0.100634	16 / 38
11-beta-hydroxysteroid dehydrogenase 1	HSD11B1	P28845	CHEMBL4235	Enzyme	0.100634	167 / 21
Serotonin transporter	SLC6A4	P31645	CHEMBL228	Electrochemical transporter	0.100634	64 / 5
HMG-CoA reductase	HMGCR	P04035	CHEMBL402	Oxidoreductase	0.100634	73 / 3
Cytochrome P450 51 (by homology)	CYP51A1	Q16850	CHEMBL3849	Cytochrome P450	0.100634	3 / 3
Nuclear receptor subfamily 1 group I member 3 (by homology)	NR1I3	Q14994	CHEMBL5503	Nuclear receptor	0.100634	0 / 2
Acetylcholinesterase	ACHE	P22303	CHEMBL220	Hydrolase	0.100634	13 / 2
Potassium-transporting ATPase alpha chain 2	ATP12A	P54707	CHEMBL2933	Primary active transporter	0.100634	7 / 3
Norepinephrine transporter	SLC6A2	P23975	CHEMBL222	Electrochemical transporter	0.100634	13 / 2
Muscarinic acetylcholine receptor M2	CHRM2	P08172	CHEMBL211	Family A G protein-coupled receptor	0.100634	29 / 2
LXR-alpha	NR1H3	Q13133	CHEMBL2808	Nuclear receptor	0.100634	19 / 21
Niemann-Pick C1-like protein 1	NPC1L1	Q9UHC9	CHEMBL2027	Other membrane protein	0.100634	14 / 11
Cytochrome P450 2C19	CYP2C19	P33261	CHEMBL3622	Cytochrome P450	0.100634	3 / 2
Vitamin D receptor	VDR	P11473	CHEMBL1977	Nuclear receptor	0.100634	85 / 46
Nuclear receptor ROR-gamma	RORC	P51449	CHEMBL1741186	Nuclear receptor	0.100634	23 / 9
Estrogen receptor beta	ESR2	Q92731	CHEMBL242	Nuclear receptor	0.100634	12 / 46
11-beta-hydroxysteroid dehydrogenase 2	HSD11B2	P80365	CHEMBL3746	Enzyme	0.100634	9 / 5
Testis-specific androgen-binding protein	SHBG	P04278	CHEMBL3305	Secreted protein	0.100634	1 / 41
Butyrylcholinesterase	BCHE	P06276	CHEMBL1914	Hydrolase	0.100634	11 / 2
UDP-glucuronosyltransferase 2B7	UGT2B7	P16662	CHEMBL4370	Enzyme	0.100634	0 / 22
Calcitonin gene-related peptide type 1 receptor	CALCRL	Q16602	CHEMBL3798	Family B G protein-coupled receptor	0.100634	7 / 0
Carboxylesterase 2	CES2	O00748	CHEMBL3180	Enzyme	0.100634	8 / 7
C-C chemokine receptor type 1	CCR1	P32246	CHEMBL2413	Family A G protein-coupled receptor	0.100634	39 / 0
Phosphodiesterase 10A	PDE10A	Q9Y233	CHEMBL4409	Phosphodiesterase	0.100634	62 / 0
Tyrosine-protein kinase BRK	PTK6	Q13882	CHEMBL4601	Kinase	0.100634	3 / 0
p53-binding protein Mdm-2	MDM2	Q00987	CHEMBL5023	Other nuclear protein	0.100634	83 / 0
Epoxide hydratase	EPHX2	P34913	CHEMBL2409	Protease	0.100634	26 / 0
Protein kinase C gamma	PRKCG	P05129	CHEMBL2938	Kinase	0.100634	8 / 0
Protein kinase C delta	PRKCD	Q05655	CHEMBL2996	Kinase	0.100634	25 / 0
Protein kinase C beta	PRKCB	P05771	CHEMBL3045	Kinase	0.100634	71 / 0
Protein kinase C epsilon	PRKCE	Q02156	CHEMBL3582	Kinase	0.100634	10 / 0
Thrombin and coagulation factor X	F10	P00742	CHEMBL244	Protease	0.100634	27 / 0
C-X-C chemokine receptor type 3	CXCR3	P49682	CHEMBL4441	Family A G protein-coupled receptor	0.100634	4 / 0
Purinergic receptor P2Y12	P2RY12	Q9H244	CHEMBL2001	Family A G protein-coupled receptor	0.100634	2 / 0
MAP kinase p38 alpha	MAPK14	Q16539	CHEMBL260	Kinase	0.100634	97 / 0
Pregnane X receptor	NR1I2	O75469	CHEMBL3401	Nuclear receptor	0	3 / 0
Cytochrome P450 24A1	CYP24A1	Q07973	CHEMBL4521	Enzyme	0	9 / 0
Ephrin receptor	EPHB4	P54760	CHEMBL5147	Kinase	0	27 / 0
Squalene monooxygenase	SQLE	Q14534	CHEMBL3592	Enzyme	0	0 / 4
Voltage-gated potassium channel subunit Kv1.3	KCNA3	P22001	CHEMBL4633	Voltage-gated ion channel	0	7 / 0
Serine/threonine-protein kinase Chk1	CHEK1	O14757	CHEMBL4630	Kinase	0	22 / 0
Phosphodiesterase 2A	PDE2A	O00408	CHEMBL2652	Phosphodiesterase	0	21 / 0
DNA polymerase beta	POLB	P06746	CHEMBL2392	Enzyme	0	0 / 5
Receptor-type tyrosine-protein phosphatase F (LAR)	PTPRF	P10586	CHEMBL3521	Membrane receptor	0	0 / 1
Low molecular weight phosphotyrosine protein phosphatase	ACP1	P24666	CHEMBL4903	Phosphatase	0	0 / 1
Aldo-keto reductase family 1 member B10	AKR1B10	O60218	CHEMBL5983	Enzyme	0	0 / 6
G-protein coupled receptor 55	GPR55	Q9Y2T6	CHEMBL1075322	Family A G protein-coupled receptor	0	1 / 0
N-arachidonyl glycine receptor	GPR18	Q14330	CHEMBL2384898	Family A G protein-coupled receptor	0	1 / 0
Estrogen-related receptor alpha	ESRRA	P11474	CHEMBL3429	Nuclear receptor	0	4 / 0
Estrogen-related receptor beta	ESRRB	O95718	CHEMBL3751	Nuclear receptor	0	4 / 0
T-cell protein-tyrosine phosphatase	PTPN2	P17706	CHEMBL3807	Phosphatase	0	6 / 15
Renin	REN	P00797	CHEMBL286	Protease	0	293 / 0
Serotonin 2b (5-HT2b) receptor	HTR2B	P41595	CHEMBL1833	Family A G protein-coupled receptor	0	7 / 0
Adrenergic receptor alpha-2	ADRA2C	P18825	CHEMBL1916	Family A G protein-coupled receptor	0	13 / 0
LIM domain kinase 1	LIMK1	P53667	CHEMBL3836	Kinase	0	15 / 0
Protein kinase C theta	PRKCQ	Q04759	CHEMBL3920	Kinase	0	17 / 0
Hepatocyte growth factor receptor	MET	P08581	CHEMBL3717	Kinase	0	32 / 0
Tyrosine kinase non-receptor protein 2	TNK2	Q07912	CHEMBL4599	Kinase	0	18 / 0
Tubulin--tyrosine ligase	TTL	Q8NG68	CHEMBL5549	Enzyme	0	2 / 0
Receptor protein-tyrosine kinase erbB-2	ERBB2	P04626	CHEMBL1824	Kinase	0	13 / 0
Glycogen synthase kinase-3 beta	GSK3B	P49841	CHEMBL262	Kinase	0	24 / 0
Glycogen synthase kinase-3 alpha	GSK3A	P49840	CHEMBL2850	Kinase	0	7 / 0
P2X purinoceptor 3	P2RX3	P56373	CHEMBL2998	Ligand-gated ion channel	0	35 / 0
Gamma-secretase	PSEN2 PSENEN NCSTN APH1A PSEN1 APH1B	P49810 Q9NZ42 Q92542 Q96BI3 P49768 Q8WW43	CHEMBL2094135	Protease	0	38 / 0
Serine/threonine-protein kinase Aurora-A	AURKA	O14965	CHEMBL4722	Kinase	0	43 / 0
Neurokinin 1 receptor	TACR1	P25103	CHEMBL249	Family A G protein-coupled receptor	0	49 / 0
Melanin-concentrating hormone receptor 1	MCHR1	Q99705	CHEMBL344	Family A G protein-coupled receptor	0	75 / 0
Neurokinin 2 receptor	TACR2	P21452	CHEMBL2327	Family A G protein-coupled receptor	0	57 / 0
Protein Mdm4	MDM4	O15151	CHEMBL1255126	Unclassified protein	0	2 / 0
Sphingosine 1-phosphate receptor Edg-3	S1PR3	Q99500	CHEMBL3892	Family A G protein-coupled receptor	0	17 / 0
Sphingosine 1-phosphate receptor Edg-1	S1PR1	P21453	CHEMBL4333	Family A G protein-coupled receptor	0	11 / 0
Vascular endothelial growth factor receptor 2	KDR	P35968	CHEMBL279	Kinase	0	100 / 0
Cathepsin S	CTSS	P25774	CHEMBL2954	Protease	0	11 / 0
Orexin receptor 2	HCRTR2	O43614	CHEMBL4792	Family A G protein-coupled receptor	0	9 / 0
Orexin receptor 1	HCRTR1	O43613	CHEMBL5113	Family A G protein-coupled receptor	0	8 / 0
Smoothened homolog	SMO	Q99835	CHEMBL5971	Frizzled family G protein-coupled receptor	0	29 / 0
ALK tyrosine kinase receptor	ALK	Q9UM73	CHEMBL4247	Kinase	0	53 / 0
Cyclooxygenase-2	PTGS2	P35354	CHEMBL230	Oxidoreductase	0	20 / 3
Sterol regulatory element-binding protein 2	SREBF2	Q12772	CHEMBL1795166	Unclassified protein	0	1 / 1
Interleukin-6 receptor subunit beta	IL6ST	P40189	CHEMBL3124734	Membrane receptor	0	1 / 0
Lymphocyte differentiation antigen CD38	CD38	P28907	CHEMBL4660	Enzyme	0	6 / 0
Cytochrome P450 26A1	CYP26A1	O43174	CHEMBL5141	Cytochrome P450	0	1 / 0
Bile acid receptor FXR	NR1H4	Q96RI1	CHEMBL2047	Nuclear receptor	0	7 / 2
Cyclin-dependent kinase 4/cyclin D1	CCND1 CDK4	P24385 P11802	CHEMBL1907601	Kinase	0	22 / 0
Cyclin-dependent kinase 2/cyclin E	CCNE2 CDK2 CCNE1	O96020 P24941 P24864	CHEMBL2094126	Other cytosolic protein	0	17 / 0
Cyclin-dependent kinase 6	CDK6	Q00534	CHEMBL2508	Kinase	0	11 / 0
Proteinase-activated receptor 1	F2R	P25116	CHEMBL3974	Family A G protein-coupled receptor	0	9 / 0
Diacylglycerol O-acyltransferase 1	DGAT1	O75907	CHEMBL6009	Enzyme	0	6 / 0
Cyclin T1	CCNT1	O60563	CHEMBL2108	Other cytosolic protein	0	33 / 0
Heat shock protein HSP 90-alpha	HSP90AA1	P07900	CHEMBL3880	Other cytosolic protein	0	29 / 0
Pyruvate dehydrogenase kinase isoform 1	PDK1	Q15118	CHEMBL4766	Kinase	0	3 / 0
Protein farnesyltransferase	FNTA FNTB	P49354 P49356	CHEMBL2094108	Enzyme	0	10 / 5
Mitogen-activated protein kinase kinase kinase 14	MAP3K14	Q99558	CHEMBL5888	Kinase	0	58 / 0
Intercellular adhesion molecule (ICAM-1), Integrin alpha-L/beta-2	ITGAL ICAM1 ITGB2	P20701 P05362 P05107	CHEMBL2096661	Membrane receptor	0	6 / 0
Protein-tyrosine phosphatase 1C	PTPN6	P29350	CHEMBL3166	Phosphatase	0	0 / 1
Mu opioid receptor (by homology)	OPRM1	P35372	CHEMBL233	Family A G protein-coupled receptor	0	110 / 0
Delta opioid receptor (by homology)	OPRD1	P41143	CHEMBL236	Family A G protein-coupled receptor	0	85 / 0

## Sheet: (4S)-4- (2E)-Oct-2-enoyloxy -4-
Target Key	Target Name	Description	P-Value	MaxTC
C[N+](C)(C)C[C@@H](CC(=O)[O-])O
compound_1
MCAT_HUMAN	SLC25A20	Mitochondrial carnitine/acylcarnitine carrier protein	5.351e-37	0.29
CPT1B_RAT	Cpt1b	Carnitine O-palmitoyltransferase 1, muscle isoform	9.396e-07	0.29
CPT2_RAT	Cpt2	Carnitine O-palmitoyltransferase 2, mitochondrial	4.029e-06	0.41
CPT2_HUMAN	CPT2	Carnitine O-palmitoyltransferase 2, mitochondrial	4.264e-06	0.41
Q8VH27_CAVPO	GPM2	Muscarinic acetylcholine receptor	4.799e-06	0.35
SwissTargetPrediction
Target	Common name	Uniprot ID	ChEMBL ID	Target Class	Probability*	Known actives (3D/2D)
Gamma-butyrobetaine dioxygenase	BBOX1	O75936	CHEMBL2163175	Enzyme	0.0630257	0 / 11
Matrix metalloproteinase 2	MMP2	P08253	CHEMBL333	Protease	0.0535179	7 / 0
Matrix metalloproteinase 8	MMP8	P22894	CHEMBL4588	Protease	0.0535179	1 / 0
Matrix metalloproteinase 3	MMP3	P08254	CHEMBL283	Protease	0	2 / 0
Matrix metalloproteinase 9	MMP9	P14780	CHEMBL321	Protease	0	1 / 0
GABA transporter 1	SLC6A1	P30531	CHEMBL1903	Electrochemical transporter	0	0 / 1
GABA-B receptor	GABBR2 GABBR1	O75899 Q9UBS5	CHEMBL2111463	Family C G protein-coupled receptor	0	0 / 1
GABA transporter 3	SLC6A11	P48066	CHEMBL5208	Electrochemical transporter	0	0 / 1
GABA transporter 2 (by homology)	SLC6A13	Q9NSD5	CHEMBL4535	Electrochemical transporter	0	0 / 1
Carnitine palmitoyltransferase 2	CPT2	P23786	CHEMBL3238	Enzyme	0	1 / 1
Carbonic anhydrase II	CA2	P00918	CHEMBL205	Lyase	0	8 / 1
Carbonic anhydrase I	CA1	P00915	CHEMBL261	Lyase	0	8 / 1
Carbonic anhydrase XII	CA12	O43570	CHEMBL3242	Lyase	0	8 / 1
Carbonic anhydrase IX	CA9	Q16790	CHEMBL3594	Lyase	0	8 / 1
Excitatory amino acid transporter 3	SLC1A1	P43005	CHEMBL2721	Electrochemical transporter	0	0 / 2
Matrix metalloproteinase 1	MMP1	P03956	CHEMBL332	Protease	0	1 / 0
Protein tyrosine kinase 2 beta	PTK2B	Q14289	CHEMBL5469	Kinase	0	2 / 0
Dipeptidyl peptidase II	DPP7	Q9UHL4	CHEMBL3976	Protease	0	0 / 1
Fructose-1,6-bisphosphatase	FBP1	P09467	CHEMBL3975	Enzyme	0	10 / 0
Dopamine transporter (by homology)	SLC6A3	Q01959	CHEMBL238	Electrochemical transporter	0	1 / 0
Glutamate receptor ionotropic kainate 1	GRIK1	P39086	CHEMBL1918	Ligand-gated ion channel	0	0 / 5
Glutamate receptor ionotropic, AMPA 1	GRIA1	P42261	CHEMBL2009	Ligand-gated ion channel	0	0 / 1
Adenosine A3 receptor	ADORA3	P0DMS8	CHEMBL256	Family A G protein-coupled receptor	0	0 / 1
Glutamate receptor ionotropic kainate 5	GRIK5	Q16478	CHEMBL2675	Ligand-gated ion channel	0	0 / 1
Metabotropic glutamate receptor 4	GRM4	Q14833	CHEMBL2736	Family C G protein-coupled receptor	0	0 / 1
Metabotropic glutamate receptor 3	GRM3	Q14832	CHEMBL2888	Family C G protein-coupled receptor	0	0 / 2
Glutamate receptor ionotropic, AMPA 4	GRIA4	P48058	CHEMBL3190	Ligand-gated ion channel	0	0 / 1
Metabotropic glutamate receptor 5	GRM5	P41594	CHEMBL3227	Family C G protein-coupled receptor	0	0 / 2
Metabotropic glutamate receptor 8	GRM8	O00222	CHEMBL3228	Family C G protein-coupled receptor	0	0 / 1
Glutamate receptor ionotropic kainate 2	GRIK2	Q13002	CHEMBL3683	Ligand-gated ion channel	0	0 / 4
Glutamate receptor ionotropic kainate 3	GRIK3	Q13003	CHEMBL3684	Ligand-gated ion channel	0	0 / 1
Metabotropic glutamate receptor 1	GRM1	Q13255	CHEMBL3772	Family C G protein-coupled receptor	0	0 / 2
Metabotropic glutamate receptor 7	GRM7	Q14831	CHEMBL3777	Family C G protein-coupled receptor	0	0 / 1
Glutamate receptor ionotropic, AMPA 2	GRIA2	P42262	CHEMBL4016	Ligand-gated ion channel	0	0 / 1
Metabotropic glutamate receptor 6	GRM6	O15303	CHEMBL4573	Family C G protein-coupled receptor	0	0 / 1
Metabotropic glutamate receptor 2	GRM2	Q14416	CHEMBL5137	Family C G protein-coupled receptor	0	0 / 6
Neprilysin	MME	P08473	CHEMBL1944	Protease	0	0 / 4
Metastin receptor	KISS1R	Q969F8	CHEMBL5413	Family A G protein-coupled receptor	0	0 / 2
Peptidyl-prolyl cis-trans isomerase NIMA-interacting 1	PIN1	Q13526	CHEMBL2288	Enzyme	0	3 / 0
Betaine transporter	SLC6A12	P48065	CHEMBL3715	Electrochemical transporter	0	0 / 2
Phospholipase A2 group IIC	PLA2G2C	Q5R387	CHEMBL2097	Enzyme	0	0 / 1
Group X secretory phospholipase A2	PLA2G10	O15496	CHEMBL4342	Enzyme	0	0 / 1
Prostanoid EP4 receptor	PTGER4	P35408	CHEMBL1836	Family A G protein-coupled receptor	0	0 / 3
Prostanoid EP2 receptor	PTGER2	P43116	CHEMBL1881	Family A G protein-coupled receptor	0	0 / 3
Beta-glucocerebrosidase	GBA	P04062	CHEMBL2179	Enzyme	0	0 / 6
Epoxide hydratase (by homology)	EPHX2	P34913	CHEMBL2409	Protease	0	0 / 3
Prostanoid EP3 receptor	PTGER3	P43115	CHEMBL3710	Family A G protein-coupled receptor	0	0 / 3
Excitatory amino acid transporter 2	SLC1A2	P43004	CHEMBL4973	Electrochemical transporter	0	0 / 3
Arginase-1 (by homology)	ARG1	P05089	CHEMBL1075097	Enzyme	0	0 / 1
Kynurenine 3-monooxygenase (by homology)	KMO	O15229	CHEMBL2145	Oxidoreductase	0	1 / 0
GABA-A receptor; alpha-1/beta-2/gamma-2	GABRA1 GABRB2 GABRG2	P14867 P47870 P18507	CHEMBL2095172	Ligand-gated ion channel	0	1 / 1
GABA A receptor alpha-3/beta-2/gamma-2	GABRA3 GABRB2 GABRG2	P34903 P47870 P18507	CHEMBL2111339	Ligand-gated ion channel	0	1 / 1
GABA A receptor alpha-2/beta-2/gamma-2	GABRA2 GABRB2 GABRG2	P47869 P47870 P18507	CHEMBL2111413	Ligand-gated ion channel	0	1 / 1
GABA receptor rho-1 subunit	GABRR1	P24046	CHEMBL3561	Ligand-gated ion channel	0	1 / 1
Lysophosphatidic acid receptor Edg-7	LPAR3	Q9UBY5	CHEMBL3250	Family A G protein-coupled receptor	0	1 / 0
Glutamate carboxypeptidase II	FOLH1	Q04609	CHEMBL1892	Protease	0	0 / 4
NAALADase II	NAALAD2	Q9Y3Q0	CHEMBL2609	Protease	0	0 / 5
Cathepsin K	CTSK	P43235	CHEMBL268	Protease	0	1 / 0
Cytosolic phospholipase A2	PLA2G4A	P47712	CHEMBL3816	Enzyme	0	0 / 1
Voltage-gated calcium channel alpha2/delta subunit 1	CACNA2D1	P54289	CHEMBL1919	Calcium channel auxiliary subunit alpha2delta family	0	0 / 1
Renin	REN	P00797	CHEMBL286	Protease	0	0 / 1
Bile acid receptor FXR	NR1H4	Q96RI1	CHEMBL2047	Nuclear receptor	0	0 / 1
Mitochondrial carnitine/acylcarnitine carrier protein	SLC25A20	O43772	CHEMBL2216740	Electrochemical transporter	0	0 / 1
Ornithine decarboxylase (by homology)	ODC1	P11926	CHEMBL1869	Lyase	0	0 / 1
Alpha-L-fucosidase I	FUCA1	P04066	CHEMBL4176	Enzyme	0	0 / 4
Lysine-specific demethylase 4D-like	KDM4E	B2RXH2	CHEMBL1293226	Eraser	0	0 / 2
Lysine-specific demethylase 6B	KDM6B	O15054	CHEMBL1938211	Eraser	0	0 / 1
Muscarinic acetylcholine receptor M1 (by homology)	CHRM1	P11229	CHEMBL216	Family A G protein-coupled receptor	0	0 / 2
Muscarinic acetylcholine receptor M2 (by homology)	CHRM2	P08172	CHEMBL211	Family A G protein-coupled receptor	0	0 / 4
Muscarinic acetylcholine receptor M3 (by homology)	CHRM3	P20309	CHEMBL245	Family A G protein-coupled receptor	0	0 / 3
Estradiol 17-beta-dehydrogenase 3	HSD17B3	P37058	CHEMBL4234	Enzyme	0	0 / 1
Alpha-L-fucosidase 2	FUCA2	Q9BTY2	CHEMBL2271	Enzyme	0	0 / 1
Liver glycogen phosphorylase	PYGL	P06737	CHEMBL2568	Enzyme	0	0 / 1
Carboxypeptidase B2 isoform A	CPB2	Q96IY4	CHEMBL3419	Protease	0	0 / 1
Carboxypeptidase N, catalytic subunit	CPN1	P15169	CHEMBL4713	Protease	0	0 / 1
Androgen Receptor	AR	P10275	CHEMBL1871	Nuclear receptor	0	0 / 4
Dipeptidyl peptidase IV	DPP4	P27487	CHEMBL284	Protease	0	0 / 3
Aminopeptidase N	ANPEP	P15144	CHEMBL1907	Protease	0	1 / 1
Aminopeptidase A	ENPEP	Q07075	CHEMBL3439	Protease	0	1 / 2
Lysine-specific demethylase 2A	KDM2A	Q9Y2K7	CHEMBL1938210	Eraser	0	1 / 3
Histone lysine demethylase PHF8	PHF8	Q9UPP1	CHEMBL1938212	Eraser	0	1 / 2
Lysine-specific demethylase 5C	KDM5C	P41229	CHEMBL2163176	Eraser	0	1 / 2

## Sheet: (R)-3-(4-Hydroxyphenyl)lactate 
Target Key	Target Name	Description	P-Value	MaxTC
C1=CC(=CC=C1C[C@H](C(=O)[O-])O)O
compound_1
SYYC_HUMAN	YARS1	Tyrosine--tRNA ligase, cytoplasmic	2.202e-101	0.44
H9TVJ1_CHISP		TyR1	7.763e-55	0.35
CBPA3_HUMAN	CPA3	Mast cell carboxypeptidase A	1.354e-53	0.3
GRIA1_RAT	Gria1	Glutamate receptor 1	1.24e-50	0.34
GRIA1_HUMAN	GRIA1	Glutamate receptor 1	2.714e-44	0.35
NEP_RABIT	MME	Neprilysin	6.067e-39	0.39
UBP4_HUMAN	USP4	Ubiquitin carboxyl-terminal hydrolase 4	2.435e-37	0.3
PSB6_YEAST	PRE7	Proteasome subunit beta type-6	2.707e-37	0.3
SSDH_HUMAN	ALDH5A1	Succinate-semialdehyde dehydrogenase, mitochondrial	3.56e-37	0.29
PHHY_PSEFL	pobA	p-hydroxybenzoate hydroxylase	3.875e-36	0.29
TY3H_RAT	Th	Tyrosine 3-monooxygenase	3.875e-36	0.29
NEP_PIG	MME	Neprilysin	2.707e-33	0.38
ADRB2_RAT	Adrb2	Beta-2 adrenergic receptor	3.315e-27	0.36
ELAS_PSEAE	lasB	Elastase	2.143e-25	0.36
CBPA1_HUMAN	CPA1	Carboxypeptidase A1	6.963e-25	0.38
CBPA1_BOVIN	CPA1	Carboxypeptidase A1	4.374e-24	0.31
ACE_HUMAN	ACE	Angiotensin-converting enzyme	4.566e-24	0.41
UBP5_HUMAN	USP5	Ubiquitin carboxyl-terminal hydrolase 5	4.904e-24	0.3
GABT_HUMAN	ABAT	4-aminobutyrate aminotransferase, mitochondrial	6.243e-24	0.29
POLG_CXB3N		Genome polyprotein	7.519e-23	0.35
TAAR1_MACMU	TAAR1	Trace amine-associated receptor 1	9.962e-23	0.45
CSK_HUMAN	CSK	Tyrosine-protein kinase CSK	1.228e-22	0.46
TAT_HV1H2	tat	Protein Tat	9.497e-21	0.33
OPRM_RAT	Oprm1	Mu-type opioid receptor	3.307e-20	0.44
ACE2_HUMAN	ACE2	Angiotensin-converting enzyme 2	1.951e-19	0.38
ACE_RAT	Ace	Angiotensin-converting enzyme	7.081e-19	0.39
ADRB3_RAT	Adrb3	Beta-3 adrenergic receptor	1.022e-18	0.32
S15A2_RAT	Slc15a2	Solute carrier family 15 member 2	1.053e-18	0.36
PSA1_HUMAN	PSMA1	Proteasome subunit alpha type-1	1.102e-18	0.32
PSA2_HUMAN	PSMA2	Proteasome subunit alpha type-2	1.102e-18	0.32
PSA3_HUMAN	PSMA3	Proteasome subunit alpha type-3	1.102e-18	0.32
PSA4_HUMAN	PSMA4	Proteasome subunit alpha type-4	1.102e-18	0.32
PSA5_HUMAN	PSMA5	Proteasome subunit alpha type-5	1.102e-18	0.32
PSA6_HUMAN	PSMA6	Proteasome subunit alpha type-6	1.102e-18	0.32
PSA7_HUMAN	PSMA7	Proteasome subunit alpha type-7	1.102e-18	0.32
PSB11_HUMAN	PSMB11	Proteasome subunit beta type-11	1.102e-18	0.32
PSB3_HUMAN	PSMB3	Proteasome subunit beta type-3	1.102e-18	0.32
PSB4_HUMAN	PSMB4	Proteasome subunit beta type-4	1.102e-18	0.32
PSB6_HUMAN	PSMB6	Proteasome subunit beta type-6	1.102e-18	0.32
PSB7_HUMAN	PSMB7	Proteasome subunit beta type-7	1.102e-18	0.32
PSMA8_HUMAN	PSMA8	Proteasome subunit alpha-type 8	1.102e-18	0.32
PSB5_YEAST	PRE2	Proteasome subunit beta type-5	1.332e-18	0.3
PSB10_HUMAN	PSMB10	Proteasome subunit beta type-10	4.311e-18	0.32
TY3H_HUMAN	TH	Tyrosine 3-monooxygenase	4.879e-18	0.29
Q79MP6_PSEAI	blaIMP-1	Beta-lactamase	5.43e-18	0.33
AMD_RAT	Pam	Peptidylglycine alpha-amidating monooxygenase	2.824e-17	0.34
AMPE_HUMAN	ENPEP	Glutamyl aminopeptidase	3.277e-17	0.33
MYG_HUMAN	MB	Myoglobin	5.551e-16	0.3
IL1B_HUMAN	IL1B	Interleukin-1 beta	1.11e-15	0.3
PSB9_HUMAN	PSMB9	Proteasome subunit beta type-9	2.442e-15	0.32
NPY4R_HUMAN	NPY4R	Neuropeptide Y receptor type 4	5.995e-15	0.29
S22AK_MOUSE	Slc22a20	Solute carrier family 22 member 20	8.549e-15	0.32
PSB1_HUMAN	PSMB1	Proteasome subunit beta type-1	9.215e-15	0.32
ACHD_HUMAN	CHRND	Acetylcholine receptor subunit delta	1.41e-14	0.35
NEP_RAT	Mme	Neprilysin	2.52e-14	0.35
OPRD_RAT	Oprd1	Delta-type opioid receptor	5.04e-14	0.44
NEP_HUMAN	MME	Neprilysin	6.506e-14	0.41
OPRM_CAVPO	OPRM1	Mu-type opioid receptor	6.706e-14	0.38
TYRO_HUMAN	TYR	Tyrosinase	7.386e-13	0.34
ACE_RABIT	ACE	Angiotensin-converting enzyme	7.567e-13	0.4
PSB2_HUMAN	PSMB2	Proteasome subunit beta type-2	8.63e-13	0.32
Q3I4V7_CRYNV	CAN2	Carbonic anhydrase	1.066e-12	0.43
PSB8_HUMAN	PSMB8	Proteasome subunit beta type-8	2.044e-12	0.32
Q2PCB5_DICLA	ca	Carbonic anhydrase	2.492e-12	0.33
PLMN_BOVIN	PLG	Plasminogen	1.196e-11	0.28
AMPL_PIG	LAP3	Cytosol aminopeptidase	2.112e-11	0.33
SOAT1_CHLAE	SOAT1	Sterol O-acyltransferase 1	3.836e-11	0.33
S22A6_MOUSE	Slc22a6	Solute carrier family 22 member 6	4.506e-11	0.32
NANA_STREE	nanA	Sialidase A	7.648e-11	0.32
PCNA_HUMAN	PCNA	Proliferating cell nuclear antigen	7.821e-11	0.3
MTSI_SPISQ	sssIM	CPG DNA methylase	5.219e-10	0.31
ESR2_HUMAN	ESR2	Estrogen receptor beta	6.431e-10	0.47
NMUR2_HUMAN	NMUR2	Neuromedin-U receptor 2	9.414e-10	0.31
ESR2_RAT	Esr2	Estrogen receptor beta	2.284e-09	0.4
CTBP2_HUMAN	CTBP2	C-terminal-binding protein 2	4.299e-09	0.36
MTCA1_MYCTU	mtcA1	Beta-carbonic anhydrase 1	5.174e-09	0.42
ESR1_HUMAN	ESR1	Estrogen receptor	6.563e-09	0.47
SOAT2_CHLAE	SOAT2	Sterol O-acyltransferase 2	1.049e-08	0.33
S22A6_RAT	Slc22a6	Solute carrier family 22 member 6	1.187e-08	0.32
MDM4_HUMAN	MDM4	Protein Mdm4	2.375e-08	0.4
NALD2_HUMAN	NAALAD2	N-acetylated-alpha-linked acidic dipeptidase 2	3.393e-08	0.41
CAH3_HUMAN	CA3	Carbonic anhydrase 3	4.975e-08	0.33
CAN_CANAL	NCE103	Carbonic anhydrase	5.403e-08	0.43
OPRD_MOUSE	Oprd1	Delta-type opioid receptor	7.141e-08	0.38
AMPN_PIG	ANPEP	Aminopeptidase N	1.012e-07	0.42
PSB5_HUMAN	PSMB5	Proteasome subunit beta type-5	1.226e-07	0.32
ERAP2_HUMAN	ERAP2	Endoplasmic reticulum aminopeptidase 2	2.431e-07	0.33
ALBU_BOVIN	ALB	Serum albumin	2.807e-07	0.32
PGH2_BOVIN	PTGS2	Prostaglandin G/H synthase 2	5.094e-07	0.32
DHB3_HUMAN	HSD17B3	Testosterone 17-beta-dehydrogenase 3	1.936e-06	0.28
CELA1_HUMAN	CELA1	Chymotrypsin-like elastase family member 1	1.995e-06	0.28
BLA2_BACCE	blm	Metallo-beta-lactamase type 2	2.175e-06	0.31
ERR3_HUMAN	ESRRG	Estrogen-related receptor gamma	2.226e-06	0.3
ADRB2_BOVIN	ADRB2	Beta-2 adrenergic receptor	2.48e-06	0.29
Q8CGM4_CAVPO	OPRM1	Mu-opioid receptor	3.306e-06	0.31
GABT_RAT	Abat	4-aminobutyrate aminotransferase, mitochondrial	5.065e-06	0.31
OPRD_HUMAN	OPRD1	Delta-type opioid receptor	8.903e-06	0.32
SwissTargetPrediction
Target	Common name	Uniprot ID	ChEMBL ID	Target Class	Probability*	Known actives (3D/2D)
Estrogen receptor alpha	ESR1	P03372	CHEMBL206	Nuclear receptor	0.0893705	0 / 64
Estrogen receptor beta	ESR2	Q92731	CHEMBL242	Nuclear receptor	0.08057	1 / 62
Carbonic anhydrase II	CA2	P00918	CHEMBL205	Lyase	0.0717872	28 / 7
Peroxisome proliferator-activated receptor gamma	PPARG	P37231	CHEMBL235	Nuclear receptor	0.0717872	0 / 138
Peroxisome proliferator-activated receptor alpha	PPARA	Q07869	CHEMBL239	Nuclear receptor	0.0717872	0 / 150
Tyrosine-protein kinase FYN	FYN	P06241	CHEMBL1841	Kinase	0.0717872	3 / 5
Tyrosine-protein kinase LCK	LCK	P06239	CHEMBL258	Kinase	0.0717872	3 / 2
Epidermal growth factor receptor erbB1	EGFR	P00533	CHEMBL203	Kinase	0.0717872	1 / 3
G protein-coupled receptor 44	PTGDR2	Q9Y5Y4	CHEMBL5071	Family A G protein-coupled receptor	0.0717872	1 / 0
Carbonic anhydrase XII	CA12	O43570	CHEMBL3242	Lyase	0.0717872	15 / 0
Thyroid hormone receptor alpha	THRA	P10827	CHEMBL1860	Nuclear receptor	0.0717872	0 / 24
Thyroid hormone receptor beta-1	THRB	P10828	CHEMBL1947	Nuclear receptor	0.0717872	0 / 28
Leucine aminopeptidase	LAP3	P28838	CHEMBL3965	Protease	0.0717872	2 / 0
Lysine-specific demethylase 4D-like	KDM4E	B2RXH2	CHEMBL1293226	Eraser	0.0717872	5 / 2
Peroxisome proliferator-activated receptor delta	PPARD	Q03181	CHEMBL3979	Nuclear receptor	0.0717872	0 / 44
11-beta-hydroxysteroid dehydrogenase 1	HSD11B1	P28845	CHEMBL4235	Enzyme	0	0 / 28
Free fatty acid receptor 1	FFAR1	O14842	CHEMBL4422	Family A G protein-coupled receptor	0	0 / 52
Thiopurine S-methyltransferase	TPMT	P51580	CHEMBL2500	Enzyme	0	4 / 0
Fructose-1,6-bisphosphatase	FBP1	P09467	CHEMBL3975	Enzyme	0	12 / 0
Aldose reductase	AKR1B1	P15121	CHEMBL1900	Enzyme	0	21 / 10
Growth factor receptor-bound protein 2	GRB2	P62993	CHEMBL3663	Other cytosolic protein	0	0 / 1
Cyclooxygenase-2	PTGS2	P35354	CHEMBL230	Oxidoreductase	0	6 / 43
L-type amino acid transporter 1	SLC7A5	Q01650	CHEMBL4459	Electrochemical transporter	0	0 / 3
Lysine-specific demethylase 4A	KDM4A	O75164	CHEMBL5896	Eraser	0	3 / 0
Endothelin-converting enzyme 1	ECE1	P42892	CHEMBL4791	Protease	0	2 / 0
Interleukin-8	CXCL8	P10145	CHEMBL2157	Secreted protein	0	0 / 1
Solute carrier family 22 member 6 (by homology)	SLC22A6	Q4U2R8	CHEMBL1641347	Electrochemical transporter	0	0 / 1
Tyrosine 3-hydroxylase	TH	P07101	CHEMBL1969	Oxidoreductase	0	0 / 1
Alpha-L-fucosidase I	FUCA1	P04066	CHEMBL4176	Enzyme	0	5 / 0
Norepinephrine transporter	SLC6A2	P23975	CHEMBL222	Electrochemical transporter	0	0 / 17
Mast cell carboxypeptidase A	CPA3	P15088	CHEMBL2645	Protease	0	0 / 3
Cytochrome P450 1A2	CYP1A2	P05177	CHEMBL3356	Cytochrome P450	0	0 / 1
Carboxypeptidase B2 isoform A	CPB2	Q96IY4	CHEMBL3419	Protease	0	0 / 1
Lysine-specific demethylase 3A	KDM3A	Q9Y4C1	CHEMBL1938209	Eraser	0	1 / 0
Lysine-specific demethylase 6B	KDM6B	O15054	CHEMBL1938211	Eraser	0	1 / 0
Alpha-ketoglutarate-dependent dioxygenase FTO	FTO	Q9C0B1	CHEMBL2331065	Oxidoreductase	0	2 / 0
Lysine-specific demethylase 4C	KDM4C	Q9H3R0	CHEMBL6175	Eraser	0	2 / 0
AMP deaminase 3	AMPD3	Q01432	CHEMBL2912	Enzyme	0	3 / 0
Receptor-type tyrosine-protein phosphatase alpha	PTPRA	P18433	CHEMBL3918	Phosphatase	0	0 / 1
Testis-specific androgen-binding protein	SHBG	P04278	CHEMBL3305	Secreted protein	0	0 / 12
Tyrosinase	TYR	P14679	CHEMBL1973	Oxidoreductase	0	0 / 5
Steroid 5-alpha-reductase 2	SRD5A2	P31213	CHEMBL1856	Oxidoreductase	0	0 / 3
Melatonin receptor 1A	MTNR1A	P48039	CHEMBL1945	Family A G protein-coupled receptor	0	0 / 6
Intercellular adhesion molecule (ICAM-1), Integrin alpha-L/beta-2	ITGAL ICAM1 ITGB2	P20701 P05362 P05107	CHEMBL2096661	Membrane receptor	0	2 / 0
Glutathione reductase	GSR	P00390	CHEMBL2755	Oxidoreductase	0	1 / 0
Cytochrome P450 19A1	CYP19A1	P11511	CHEMBL1978	Cytochrome P450	0	0 / 18
Bile acid receptor FXR	NR1H4	Q96RI1	CHEMBL2047	Nuclear receptor	0	0 / 2
DNA-(apurinic or apyrimidinic site) lyase	APEX1	P27695	CHEMBL5619	Enzyme	0	0 / 1
Lysine-specific demethylase 2A	KDM2A	Q9Y2K7	CHEMBL1938210	Eraser	0	3 / 0
Androgen Receptor	AR	P10275	CHEMBL1871	Nuclear receptor	0	0 / 12
Low affinity neurotrophin receptor p75NTR	NGFR	P08138	CHEMBL4762	Membrane receptor	0	1 / 0
Prostanoid FP receptor	PTGFR	P43088	CHEMBL1987	Family A G protein-coupled receptor	0	0 / 9
C-terminal-binding protein 2	CTBP2	P56545	CHEMBL3797016	Unclassified protein	0	2 / 13
Uracil nucleotide/cysteinyl leukotriene receptor	GPR17	Q13304	CHEMBL1075162	Family A G protein-coupled receptor	0	2 / 0
Programmed cell death protein 4	PDCD4	Q53EL6	CHEMBL1781868	Unclassified protein	0	1 / 0
GABA-A receptor; alpha-1/beta-2/gamma-2	GABRA1 GABRB2 GABRG2	P14867 P47870 P18507	CHEMBL2095172	Ligand-gated ion channel	0	0 / 3
Endothelin receptor ET-B	EDNRB	P24530	CHEMBL1785	Family A G protein-coupled receptor	0	0 / 3
Endothelin receptor ET-A	EDNRA	P25101	CHEMBL252	Family A G protein-coupled receptor	0	0 / 4
GABA-B receptor	GABBR2 GABBR1	O75899 Q9UBS5	CHEMBL2111463	Family C G protein-coupled receptor	0	4 / 4
Glutamate receptor ionotropic kainate 1	GRIK1	P39086	CHEMBL1918	Ligand-gated ion channel	0	18 / 0
Bifunctional protein NCOAT	OGA	O60502	CHEMBL5921	Enzyme	0	3 / 0
G-protein coupled receptor 35	GPR35	Q9HC97	CHEMBL1293267	Family A G protein-coupled receptor	0	1 / 0
Cytidine deaminase (by homology)	CDA	P32320	CHEMBL4502	Enzyme	0	1 / 0
Carboxylesterase 2	CES2	O00748	CHEMBL3180	Enzyme	0	0 / 6
DNA excision repair protein ERCC-5	ERCC5	P28715	CHEMBL4736	Other nuclear protein	0	0 / 5
Flap endonuclease 1	FEN1	P39748	CHEMBL5027	Enzyme	0	0 / 7
Catechol O-methyltransferase (by homology)	COMT	P21964	CHEMBL2023	Transferase	0	0 / 2
Aldo-keto reductase family 1 member C2	AKR1C2	P52895	CHEMBL5847	Enzyme	0	2 / 0
Aldo-keto reductase family 1 member C1	AKR1C1	Q04828	CHEMBL5905	Enzyme	0	2 / 0
Estradiol 17-beta-dehydrogenase 3	HSD17B3	P37058	CHEMBL4234	Enzyme	0	0 / 12
Alpha-2a adrenergic receptor	ADRA2A	P08913	CHEMBL1867	Family A G protein-coupled receptor	0	0 / 3
Adrenergic receptor alpha-2	ADRA2C	P18825	CHEMBL1916	Family A G protein-coupled receptor	0	0 / 2
Alpha-2b adrenergic receptor	ADRA2B	P18089	CHEMBL1942	Family A G protein-coupled receptor	0	0 / 2
Muscarinic acetylcholine receptor M2	CHRM2	P08172	CHEMBL211	Family A G protein-coupled receptor	0	0 / 4
Muscarinic acetylcholine receptor M1	CHRM1	P11229	CHEMBL216	Family A G protein-coupled receptor	0	0 / 7
Serotonin 2c (5-HT2c) receptor	HTR2C	P28335	CHEMBL225	Family A G protein-coupled receptor	0	0 / 2
Serotonin transporter	SLC6A4	P31645	CHEMBL228	Electrochemical transporter	0	0 / 23
Neurokinin 2 receptor	TACR2	P21452	CHEMBL2327	Family A G protein-coupled receptor	0	0 / 3
Dopamine transporter	SLC6A3	Q01959	CHEMBL238	Electrochemical transporter	0	0 / 22
Muscarinic acetylcholine receptor M3	CHRM3	P20309	CHEMBL245	Family A G protein-coupled receptor	0	0 / 6
Beta-3 adrenergic receptor	ADRB3	P13945	CHEMBL246	Family A G protein-coupled receptor	0	0 / 1
Trace amine-associated receptor 1 (by homology)	TAAR1	Q96RJ0	CHEMBL5857	Family A G protein-coupled receptor	0	0 / 3
Dipeptidyl peptidase IV	DPP4	P27487	CHEMBL284	Protease	0	1 / 0
Nuclear receptor ROR-gamma	RORC	P51449	CHEMBL1741186	Nuclear receptor	0	0 / 1
Carbonic anhydrase XIII (by homology)	CA13	Q8N1Q1	CHEMBL3912	Lyase	0	2 / 2
Glutamate carboxypeptidase II	FOLH1	Q04609	CHEMBL1892	Protease	0	13 / 7
GABA-B receptor (by homology)	GABBR1	Q9UBS5	CHEMBL2064	Family C G protein-coupled receptor	0	5 / 0
Kinesin-like protein 1	KIF11	P52732	CHEMBL4581	Other cytosolic protein	0	0 / 7
Glutamate receptor ionotropic, AMPA 1	GRIA1	P42261	CHEMBL2009	Ligand-gated ion channel	0	3 / 0
Glutamate receptor ionotropic kainate 5	GRIK5	Q16478	CHEMBL2675	Ligand-gated ion channel	0	2 / 0
Glutamate receptor ionotropic, AMPA 4	GRIA4	P48058	CHEMBL3190	Ligand-gated ion channel	0	4 / 0
Glutamate receptor ionotropic kainate 3	GRIK3	Q13003	CHEMBL3684	Ligand-gated ion channel	0	3 / 0
Glutamate receptor ionotropic, AMPA 2	GRIA2	P42262	CHEMBL4016	Ligand-gated ion channel	0	2 / 0
Acetylcholinesterase	ACHE	P22303	CHEMBL220	Hydrolase	0	0 / 13
Adenosine deaminase	ADA	P00813	CHEMBL1910	Hydrolase	0	1 / 0
CDC7/DBF4 (Cell division cycle 7-related protein kinase/Activator of S phase kinase)	DBF4 CDC7	Q9UBU7 O00311	CHEMBL2111377	Kinase	0	1 / 0
Caspase-3	CASP3	P42574	CHEMBL2334	Protease	0	1 / 0
Macrophage migration inhibitory factor	MIF	P14174	CHEMBL2085	Enzyme	0	1 / 1
Histone lysine demethylase PHF8	PHF8	Q9UPP1	CHEMBL1938212	Eraser	0	2 / 0
Lysine-specific demethylase 5C	KDM5C	P41229	CHEMBL2163176	Eraser	0	2 / 0

## Sheet: 10-Keto-12Z-octadecenoic acid (
Target Key	Target Name	Description	P-Value	MaxTC
CCCCCC/C=C/C(=O)CCCCCCCCC(=O)O
compound_1
TRPV2_RAT	Trpv2	Transient receptor potential cation channel subfamily V member 2	2.278e-107	0.55
CQSS_VIBCH	cqsS	CAI-1 autoinducer sensor kinase/phosphatase CqsS	2.994e-104	0.39
OXER1_HUMAN	OXER1	Oxoeicosanoid receptor 1	8.661e-79	0.69
Q6UB75_PIG		Group VII phospholipase A2	5.078e-76	0.44
LPAR1_MOUSE	Lpar1	Lysophosphatidic acid receptor 1	1.32e-74	0.4
PLCG1_BOVIN	PLCG1	1-phosphatidylinositol 4,5-bisphosphate phosphodiesterase gamma-1	3.371e-70	0.39
PA24A_BOVIN	PLA2G4A	Cytosolic phospholipase A2	1.4e-64	0.35
A3QR02_CHISP	est1	Carboxylic ester hydrolase	1.099e-59	0.38
BODG_HUMAN	BBOX1	Gamma-butyrobetaine dioxygenase	4.302e-58	0.36
P2Y10_HUMAN	P2RY10	Putative P2Y purinoceptor 10	4.072e-57	0.36
SO2B1_RAT	Slco2b1	Solute carrier organic anion transporter family member 2B1	5.263e-57	0.37
SO2A1_MOUSE	Slco2a1	Solute carrier organic anion transporter family member 2A1	1.326e-55	0.37
LOX15_PIG	ALOX15	Arachidonate 15-lipoxygenase	3.707e-50	0.43
LPAR4_HUMAN	LPAR4	Lysophosphatidic acid receptor 4	1.754e-46	0.37
CERT_HUMAN	CERT1	Ceramide transfer protein	3.286e-46	0.37
LPAR4_MOUSE	Lpar4	Lysophosphatidic acid receptor 4	3.286e-46	0.37
MCAT_HUMAN	SLC25A20	Mitochondrial carnitine/acylcarnitine carrier protein	9.364e-45	0.36
ACER2_HUMAN	ACER2	Alkaline ceramidase 2	6.889e-43	0.34
SO2A1_HUMAN	SLCO2A1	Solute carrier organic anion transporter family member 2A1	7.647e-43	0.37
CNR1_RAT	Cnr1	Cannabinoid receptor 1	4.258e-42	0.55
CP4F2_HUMAN	CYP4F2	Cytochrome P450 4F2	5.166e-42	0.33
PA24B_HUMAN	PLA2G4B	Cytosolic phospholipase A2 beta	5.71e-41	0.35
LPAR3_HUMAN	LPAR3	Lysophosphatidic acid receptor 3	1.799e-40	0.4
Q95Z89_LEIMA	Top1B	DNA topoisomerase type IB small subunit	7.545e-40	0.32
GP174_HUMAN	GPR174	Probable G-protein coupled receptor 174	3.109e-39	0.36
A1ZA98_DROME	Jhe	Carboxylic ester hydrolase	1.218e-38	0.36
GBRT_HUMAN	GABRQ	Gamma-aminobutyric acid receptor subunit theta	2.83e-38	0.3
S6A13_RAT	Slc6a13	Sodium- and chloride-dependent GABA transporter 2	2.83e-38	0.3
MSRE_MOUSE	Msr1	Macrophage scavenger receptor types I and II	3.56e-37	0.29
PA2GC_HUMAN	PLA2G2C	Putative inactive group IIC secretory phospholipase A2	1.034e-34	0.45
MPIP2_MOUSE	Cdc25b	M-phase inducer phosphatase 2	3.384e-33	0.38
Q95214_RABIT	ACAT	Acyl-CoA:cholesterol acyltransferase	2.811e-31	0.44
CPT1B_RAT	Cpt1b	Carnitine O-palmitoyltransferase 1, muscle isoform	6.767e-31	0.29
FAAH1_HUMAN	FAAH	Fatty-acid amide hydrolase 1	9.591e-31	0.5
GLCM_MOUSE	Gba	Lysosomal acid glucosylceramidase	2.404e-30	0.34
LPAR6_HUMAN	LPAR6	Lysophosphatidic acid receptor 6	1.127e-29	0.37
FAAH1_MOUSE	Faah	Fatty-acid amide hydrolase 1	1.508e-29	0.49
Q9GPG0_MANSE		Carboxylic ester hydrolase	3.477e-29	0.36
CNR1_MOUSE	Cnr1	Cannabinoid receptor 1	4.211e-29	0.43
FAAH1_RAT	Faah	Fatty-acid amide hydrolase 1	4.79e-29	0.49
GPR34_HUMAN	GPR34	Probable G-protein coupled receptor 34	5.689e-28	0.35
PA2GA_MOUSE	Pla2g2a	Phospholipase A2, membrane associated	1.136e-27	0.34
PA2GA_RABIT	PLA2G2A	Phospholipase A2, membrane associated	1.208e-27	0.34
LUXR_ALIFS	luxR	Transcriptional activator protein LuxR	1.239e-27	0.32
EST1_RABIT		Liver carboxylesterase 1	1.858e-27	0.42
POLI_MOUSE	Poli	DNA polymerase iota	5.245e-27	0.33
PA2G5_HUMAN	PLA2G5	Calcium-dependent phospholipase A2	1.175e-26	0.34
LASR_PSEAE	lasR	Transcriptional activator protein LasR	3.371e-26	0.35
CNR2_MOUSE	Cnr2	Cannabinoid receptor 2	5.707e-26	0.43
SO2A1_RAT	Slco2a1	Solute carrier organic anion transporter family member 2A1	4.758e-25	0.37
GSTK1_HUMAN	GSTK1	Glutathione S-transferase kappa 1	5.379e-25	0.31
PA2GX_HUMAN	PLA2G10	Group 10 secretory phospholipase A2	5.763e-25	0.42
LPXC_AQUAE	lpxC	UDP-3-O-acyl-N-acetylglucosamine deacetylase	8.616e-25	0.4
AMD_HUMAN	PAM	Peptidyl-glycine alpha-amidating monooxygenase	1.403e-24	0.41
PPAF_PHAVU		Fe(3+)-Zn(2+) purple acid phosphatase	1.535e-24	0.3
PA1B2_HUMAN	PAFAH1B2	Platelet-activating factor acetylhydrolase IB subunit beta	1.605e-23	0.29
PE2R2_RAT	Ptger2	Prostaglandin E2 receptor EP2 subtype	1.889e-23	0.37
SPTC2_HUMAN	SPTLC2	Serine palmitoyltransferase 2	2.907e-23	0.37
LPAR2_HUMAN	LPAR2	Lysophosphatidic acid receptor 2	3.33e-23	0.44
PA2G5_MOUSE	Pla2g5	Calcium-dependent phospholipase A2	5.585e-23	0.34
S22A6_MOUSE	Slc22a6	Solute carrier family 22 member 6	7.646e-23	0.35
EST2C_MOUSE	Ces2c	Acylcarnitine hydrolase	1.579e-22	0.29
EST2_HUMAN	CES2	Cocaine esterase	3.872e-22	0.42
LPAR1_HUMAN	LPAR1	Lysophosphatidic acid receptor 1	5.739e-22	0.44
PA21B_PIG	PLA2G1B	Phospholipase A2, major isoenzyme	1.09e-21	0.32
PA2GA_RAT	Pla2g2a	Phospholipase A2, membrane associated	1.152e-21	0.34
EST1_HUMAN	CES1	Liver carboxylesterase 1	1.375e-21	0.49
Q9MYX2_PIG	CPT1	Carnitine palmitoyl transferase I liver isoform	4.293e-21	0.35
FABPH_HUMAN	FABP3	Fatty acid-binding protein, heart	9.793e-21	0.76
LUXP_VIBHA	luxP	Autoinducer 2-binding periplasmic protein LuxP	1.03e-20	0.33
PRP19_YEAST	PRP19	Pre-mRNA-processing factor 19	3.269e-20	0.45
TRAR_RHIRD	traR	Transcriptional activator protein TraR	6.031e-20	0.32
Q9BJJ9_PLAFA	FabI	Enoyl-ACP reductase	7.563e-20	0.32
GSTM1_HUMAN	GSTM1	Glutathione S-transferase Mu 1	8.596e-19	0.3
DPEP1_PIG	DPEP1	Dipeptidase 1	2.309e-18	0.34
MGLL_RAT	Mgll	Monoglyceride lipase	2.552e-18	0.33
KDM7A_HUMAN	KDM7A	Lysine-specific demethylase 7A	4.879e-18	0.29
D5FGE8_TRYCR	POT1.5	Putative amino acid permease/transporter	7.088e-18	0.28
KAPCA_RAT	Prkaca	cAMP-dependent protein kinase catalytic subunit alpha	1.882e-17	0.33
POLH_HUMAN	POLH	DNA polymerase eta	1.882e-17	0.33
KPCA_BOVIN	PRKCA	Protein kinase C alpha type	2.929e-17	0.39
HYES_HUMAN	EPHX2	Bifunctional epoxide hydrolase 2	3.703e-17	0.64
KPCA_HUMAN	PRKCA	Protein kinase C alpha type	2.22e-16	0.39
MPIP3_HUMAN	CDC25C	M-phase inducer phosphatase 3	2.22e-16	0.47
Q8HY88_BOVIN	KCNK2	Potassium channel subfamily K member 2	2.22e-16	0.4
Q9RMS5_PSEAI	phzR	LuxR family transcriptional regulator	3.331e-16	0.35
S6A11_HUMAN	SLC6A11	Sodium- and chloride-dependent GABA transporter 3	5.551e-16	0.3
HMDH_HUMAN	HMGCR	3-hydroxy-3-methylglutaryl-coenzyme A reductase	1.665e-15	0.56
NU1M_BOVIN	MT-ND1	NADH-ubiquinone oxidoreductase chain 1	1.776e-15	0.31
CNR1_HUMAN	CNR1	Cannabinoid receptor 1	2.331e-15	0.5
G3PG_TRYCR		Glyceraldehyde-3-phosphate dehydrogenase, glycosomal	3.109e-15	0.29
KPCL_MOUSE	Prkch	Protein kinase C eta type	3.109e-15	0.29
PE2R1_MOUSE	Ptger1	Prostaglandin E2 receptor EP1 subtype	3.442e-15	0.35
S22A6_HUMAN	SLC22A6	Solute carrier family 22 member 6	2.542e-14	0.61
PE2R2_MOUSE	Ptger2	Prostaglandin E2 receptor EP2 subtype	9.093e-14	0.35
MRP2_RAT	Abcc2	Canalicular multispecific organic anion transporter 1	9.259e-14	0.33
POLK_HUMAN	POLK	DNA polymerase kappa	1.463e-13	0.33
KDM5A_HUMAN	KDM5A	Lysine-specific demethylase 5A	1.842e-13	0.38
PE2R2_HUMAN	PTGER2	Prostaglandin E2 receptor EP2 subtype	3.361e-13	0.36
NOD1_HUMAN	NOD1	Nucleotide-binding oligomerization domain-containing protein 1	8.635e-13	0.38
TA2R_HUMAN	TBXA2R	Thromboxane A2 receptor	1.143e-12	0.43
TLR2_HUMAN	TLR2	Toll-like receptor 2	1.482e-12	0.61
REST_BORBU	resT	Telomere resolvase ResT	2.246e-12	0.3
ENPP2_HUMAN	ENPP2	Ectonucleotide pyrophosphatase/phosphodiesterase family member 2	3.131e-12	0.4
S22A8_HUMAN	SLC22A8	Solute carrier family 22 member 8	1.159e-11	0.61
GNAI1_HUMAN	GNAI1	Guanine nucleotide-binding protein G(i) subunit alpha-1	1.275e-11	0.28
Q6RY99_RAT		Tetraspanin	1.309e-11	0.31
PE2R4_MOUSE	Ptger4	Prostaglandin E2 receptor EP4 subtype	2.732e-11	0.35
PF2R_BOVIN	PTGFR	Prostaglandin F2-alpha receptor	3.342e-11	0.37
TRPV1_HUMAN	TRPV1	Transient receptor potential cation channel subfamily V member 1	9.046e-11	0.5
PE2R3_MOUSE	Ptger3	Prostaglandin E2 receptor EP3 subtype	9.915e-11	0.35
DYN1_HUMAN	DNM1	Dynamin-1	1.387e-10	0.38
THAS_HUMAN	TBXAS1	Thromboxane-A synthase	1.777e-10	0.41
GBRG1_RAT	Gabrg1	Gamma-aminobutyric acid receptor subunit gamma-1	2.131e-10	0.3
PF2R_HUMAN	PTGFR	Prostaglandin F2-alpha receptor	2.991e-10	0.37
GPR18_HUMAN	GPR18	N-arachidonyl glycine receptor	3.576e-10	0.49
PA2GA_HUMAN	PLA2G2A	Phospholipase A2, membrane associated	3.77e-10	0.42
Q965D6_PLAFA	fabG	3-oxoacyl-acyl-carrier protein reductase	4.715e-10	0.32
HYEP_MOUSE	Ephx1	Epoxide hydrolase 1	1.282e-09	0.4
MPIP1_HUMAN	CDC25A	M-phase inducer phosphatase 1	1.492e-09	0.47
PE2R4_HUMAN	PTGER4	Prostaglandin E2 receptor EP4 subtype	2.543e-09	0.37
EST1_PIG		Liver carboxylesterase	2.744e-09	0.36
CNR2_HUMAN	CNR2	Cannabinoid receptor 2	3.262e-09	0.5
MPIP2_HUMAN	CDC25B	M-phase inducer phosphatase 2	4.971e-09	0.47
LOX1_SOYBN	LOX1.1	Seed linoleate 13S-lipoxygenase-1	8.218e-09	0.38
S1PR2_HUMAN	S1PR2	Sphingosine 1-phosphate receptor 2	9.115e-09	0.35
S22A6_RAT	Slc22a6	Solute carrier family 22 member 6	9.732e-09	0.33
NAAA_HUMAN	NAAA	N-acylethanolamine-hydrolyzing acid amidase	1.333e-08	0.33
PE2R3_HUMAN	PTGER3	Prostaglandin E2 receptor EP3 subtype	1.443e-08	0.37
Q965D7_PLAFA	fabZ	Beta-hydroxyacyl-ACP dehydratase	1.914e-08	0.32
AMPE_HUMAN	ENPEP	Glutamyl aminopeptidase	2.854e-08	0.31
PPARG_HUMAN	PPARG	Peroxisome proliferator-activated receptor gamma	3.012e-08	0.76
O07911_STAAU	agrC	AgrC	3.301e-08	0.29
DPOLB_HUMAN	POLB	DNA polymerase beta	5.011e-08	0.49
GSTA1_HUMAN	GSTA1	Glutathione S-transferase A1	5.111e-08	0.3
LEF_BACAN	lef	Lethal factor	8.745e-08	0.43
PF2R_MOUSE	Ptgfr	Prostaglandin F2-alpha receptor	1.211e-07	0.37
KDM4A_HUMAN	KDM4A	Lysine-specific demethylase 4A	1.36e-07	0.35
S6A11_MOUSE	Slc6a11	Sodium- and chloride-dependent GABA transporter 3	2.041e-07	0.3
ENPP2_MOUSE	Enpp2	Ectonucleotide pyrophosphatase/phosphodiesterase family member 2	2.587e-07	0.33
KDM2A_HUMAN	KDM2A	Lysine-specific demethylase 2A	3.08e-07	0.43
PPARA_HUMAN	PPARA	Peroxisome proliferator-activated receptor alpha	3.474e-07	0.76
DHB3_HUMAN	HSD17B3	Testosterone 17-beta-dehydrogenase 3	3.488e-07	0.32
DGLA_HUMAN	DAGLA	Sn1-specific diacylglycerol lipase alpha	3.909e-07	0.36
PE2R4_RAT	Ptger4	Prostaglandin E2 receptor EP4 subtype	4.837e-07	0.37
LOX12_HUMAN	ALOX12	Arachidonate 12-lipoxygenase, 12S-type	6.277e-07	0.63
GPR34_MOUSE	Gpr34	Probable G-protein coupled receptor 34	6.591e-07	0.35
CPT1A_RAT	Cpt1a	Carnitine O-palmitoyltransferase 1, liver isoform	1.184e-06	0.29
HYEP_HUMAN	EPHX1	Epoxide hydrolase 1	1.436e-06	0.31
CAC1C_RAT	Cacna1c	Voltage-dependent L-type calcium channel subunit alpha-1C	1.597e-06	0.61
LT4R1_HUMAN	LTB4R	Leukotriene B4 receptor 1	1.597e-06	0.45
PI2R_HUMAN	PTGIR	Prostacyclin receptor	1.808e-06	0.35
GABR2_HUMAN	GABBR2	Gamma-aminobutyric acid type B receptor subunit 2	2.184e-06	0.3
DPOLA_HUMAN	POLA1	DNA polymerase alpha catalytic subunit	2.48e-06	0.49
KPCE_HUMAN	PRKCE	Protein kinase C epsilon type	3.448e-06	0.31
GABR1_HUMAN	GABBR1	Gamma-aminobutyric acid type B receptor subunit 1	3.469e-06	0.3
PPCE_RAT	Prep	Prolyl endopeptidase	3.85e-06	0.34
SPHK1_HUMAN	SPHK1	Sphingosine kinase 1	4.592e-06	0.4
CNR2_RAT	Cnr2	Cannabinoid receptor 2	4.757e-06	0.43
PPARD_HUMAN	PPARD	Peroxisome proliferator-activated receptor delta	6.428e-06	0.76
P2Y10_MOUSE	P2ry10	Putative P2Y purinoceptor 10	9.072e-06	0.35
ECR_BOMMO	EcR	Ecdysone receptor	9.155e-06	0.29
TOP1_HUMAN	TOP1	DNA topoisomerase 1	9.505e-06	0.68
SwissTargetPrediction
Target	Common name	Uniprot ID	ChEMBL ID	Target Class	Probability*	Known actives (3D/2D)
Fatty acid binding protein adipocyte	FABP4	P15090	CHEMBL2083	Fatty acid binding protein family	0.246151	23 / 4
Anandamide amidohydrolase	FAAH	O00519	CHEMBL2243	Enzyme	0.246151	22 / 17
Peroxisome proliferator-activated receptor gamma	PPARG	P37231	CHEMBL235	Nuclear receptor	0.246151	360 / 25
Peroxisome proliferator-activated receptor alpha	PPARA	Q07869	CHEMBL239	Nuclear receptor	0.246151	247 / 19
Telomerase reverse transcriptase	TERT	O14746	CHEMBL2916	Enzyme	0.246151	1 / 3
Fatty acid binding protein epidermal	FABP5	Q01469	CHEMBL3674	Fatty acid binding protein family	0.246151	3 / 2
Peroxisome proliferator-activated receptor delta	PPARD	Q03181	CHEMBL3979	Nuclear receptor	0.246151	242 / 11
Fatty acid-binding protein, liver	FABP1	P07148	CHEMBL5421	Fatty acid binding protein family	0.246151	1 / 3
Protein-tyrosine phosphatase 1B	PTPN1	P18031	CHEMBL335	Phosphatase	0.18842	201 / 57
11-beta-hydroxysteroid dehydrogenase 1	HSD11B1	P28845	CHEMBL4235	Enzyme	0.171979	79 / 42
Dual specificity phosphatase Cdc25A	CDC25A	P30304	CHEMBL3775	Phosphatase	0.163737	18 / 14
Protein-tyrosine phosphatase 2C	PTPN11	Q06124	CHEMBL3864	Phosphatase	0.163737	34 / 2
Prostaglandin E synthase	PTGES	O14684	CHEMBL5658	Enzyme	0.155528	22 / 13
Fatty acid binding protein muscle	FABP3	P05413	CHEMBL3344	Fatty acid binding protein family	0.155528	13 / 5
Acyl-CoA desaturase	SCD	O00767	CHEMBL5555	Enzyme	0.139062	19 / 1
Arachidonate 5-lipoxygenase	ALOX5	P09917	CHEMBL215	Oxidoreductase	0.139062	34 / 43
Protein kinase C eta	PRKCH	P24723	CHEMBL3616	Kinase	0.139062	0 / 1
Aldo-keto reductase family 1 member B10	AKR1B10	O60218	CHEMBL5983	Enzyme	0.139062	0 / 7
Protein farnesyltransferase	FNTA FNTB	P49354 P49356	CHEMBL2094108	Enzyme	0.122582	42 / 15
Free fatty acid receptor 1	FFAR1	O14842	CHEMBL4422	Family A G protein-coupled receptor	0.122582	237 / 3
Cytochrome P450 19A1	CYP19A1	P11511	CHEMBL1978	Cytochrome P450	0.122582	0 / 311
Niemann-Pick C1-like protein 1	NPC1L1	Q9UHC9	CHEMBL2027	Other membrane protein	0.122582	0 / 10
Glucocorticoid receptor	NR3C1	P04150	CHEMBL2034	Nuclear receptor	0.122582	39 / 39
Corticosteroid binding globulin	SERPINA6	P08185	CHEMBL2421	Secreted protein	0.122582	0 / 23
Testis-specific androgen-binding protein	SHBG	P04278	CHEMBL3305	Secreted protein	0.122582	0 / 52
Cytochrome P450 17A1	CYP17A1	P05093	CHEMBL3522	Cytochrome P450	0.122582	0 / 26
T-cell protein-tyrosine phosphatase	PTPN2	P17706	CHEMBL3807	Phosphatase	0.122582	66 / 20
Steroid 5-alpha-reductase 2	SRD5A2	P31213	CHEMBL1856	Oxidoreductase	0.114338	64 / 35
11-beta-hydroxysteroid dehydrogenase 2	HSD11B2	P80365	CHEMBL3746	Enzyme	0.114338	10 / 24
MAP kinase ERK1	MAPK3	P27361	CHEMBL3385	Kinase	0.114338	0 / 1
Nitric oxide synthase, inducible	NOS2	P35228	CHEMBL4481	Enzyme	0.1061	7 / 20
Androgen Receptor	AR	P10275	CHEMBL1871	Nuclear receptor	0.1061	9 / 124
Butyrylcholinesterase	BCHE	P06276	CHEMBL1914	Hydrolase	0.1061	0 / 2
Beta-secretase 1	BACE1	P56817	CHEMBL4822	Protease	0.1061	2 / 2
Cyclooxygenase-1	PTGS1	P23219	CHEMBL221	Oxidoreductase	0.1061	1 / 2
Adenosine A3 receptor	ADORA3	P0DMS8	CHEMBL256	Family A G protein-coupled receptor	0.1061	7 / 3
Progesterone receptor	PGR	P06401	CHEMBL208	Nuclear receptor	0.0978745	17 / 50
Squalene synthetase	FDFT1	P37268	CHEMBL3338	Enzyme	0.0978745	58 / 5
Prolyl endopeptidase	PREP	P48147	CHEMBL3202	Protease	0.0978745	0 / 2
Protein-tyrosine phosphatase 1C	PTPN6	P29350	CHEMBL3166	Phosphatase	0.0978745	4 / 1
Dual specificity phosphatase Cdc25B	CDC25B	P30305	CHEMBL4804	Phosphatase	0.0978745	8 / 6
Sigma opioid receptor	SIGMAR1	Q99720	CHEMBL287	Membrane receptor	0.0978745	1 / 3
Phosphodiesterase 4D	PDE4D	Q08499	CHEMBL288	Phosphodiesterase	0.0978745	86 / 1
Cyclooxygenase-2	PTGS2	P35354	CHEMBL230	Oxidoreductase	0.0978745	17 / 5
Leukotriene B4 receptor 1	LTB4R	Q15722	CHEMBL3911	Family A G protein-coupled receptor	0.0978745	100 / 6
HMG-CoA reductase	HMGCR	P04035	CHEMBL402	Oxidoreductase	0.0978745	319 / 27
Estrogen receptor beta	ESR2	Q92731	CHEMBL242	Nuclear receptor	0.0978745	11 / 41
Mineralocorticoid receptor	NR3C2	P08235	CHEMBL1994	Nuclear receptor	0.0978745	10 / 28
Prostanoid IP receptor	PTGIR	P43119	CHEMBL1995	Family A G protein-coupled receptor	0.0978745	133 / 6
Cannabinoid receptor 1	CNR1	P21554	CHEMBL218	Family A G protein-coupled receptor	0.0978745	11 / 12
DNA polymerase beta	POLB	P06746	CHEMBL2392	Enzyme	0.0978745	2 / 10
LXR-alpha	NR1H3	Q13133	CHEMBL2808	Nuclear receptor	0.0978745	6 / 19
Prostanoid EP2 receptor (by homology)	PTGER2	P43116	CHEMBL1881	Family A G protein-coupled receptor	0.0978745	178 / 21
Receptor-type tyrosine-protein phosphatase F (LAR)	PTPRF	P10586	CHEMBL3521	Membrane receptor	0.0978745	32 / 1
Low molecular weight phosphotyrosine protein phosphatase	ACP1	P24666	CHEMBL4903	Phosphatase	0.0978745	16 / 1
Phospholipase A2 group 1B	PLA2G1B	P04054	CHEMBL4426	Enzyme	0.0978745	23 / 1
Dopamine transporter	SLC6A3	Q01959	CHEMBL238	Electrochemical transporter	0.0978745	2 / 1
CD81 antigen	CD81	P60033	CHEMBL1075180	Surface antigen	0.0978745	0 / 1
Pregnane X receptor	NR1I2	O75469	CHEMBL3401	Nuclear receptor	0.0978745	0 / 3
Estradiol 17-beta-dehydrogenase 3	HSD17B3	P37058	CHEMBL4234	Enzyme	0.0978745	0 / 11
Nuclear receptor subfamily 1 group I member 3 (by homology)	NR1I3	Q14994	CHEMBL5503	Nuclear receptor	0.0978745	0 / 2
Steroid 5-alpha-reductase 1	SRD5A1	P18405	CHEMBL1787	Oxidoreductase	0.0978745	6 / 6
Arachidonate 12-lipoxygenase	ALOX12	P18054	CHEMBL3687	Enzyme	0.0978745	2 / 2
Glucose-6-phosphate 1-dehydrogenase	G6PD	P11413	CHEMBL5347	Enzyme	0.0978745	0 / 7
Cytochrome P450 51 (by homology)	CYP51A1	Q16850	CHEMBL3849	Cytochrome P450	0.0978745	0 / 2
Prostanoid EP1 receptor (by homology)	PTGER1	P34995	CHEMBL1811	Family A G protein-coupled receptor	0.0978745	71 / 9
Estrogen receptor alpha	ESR1	P03372	CHEMBL206	Nuclear receptor	0.0978745	19 / 35
Cytochrome P450 26B1	CYP26B1	Q9NR63	CHEMBL3713687	Cytochrome P450	0.0978745	10 / 0
Cytochrome P450 26A1	CYP26A1	O43174	CHEMBL5141	Cytochrome P450	0.0978745	11 / 0
G-protein coupled receptor 120	FFAR4	Q5NUL3	CHEMBL5339	Family A G protein-coupled receptor	0.0978745	12 / 0
Glycine receptor subunit alpha-1	GLRA1	P23415	CHEMBL5845	Ligand-gated ion channel	0.0978745	1 / 0
Autotaxin	ENPP2	Q13822	CHEMBL3691	Enzyme	0.0978745	43 / 0
Potassium-transporting ATPase alpha chain 2	ATP12A	P54707	CHEMBL2933	Primary active transporter	0.0978745	0 / 8
G-protein coupled bile acid receptor 1	GPBAR1	Q8TDU6	CHEMBL5409	Family A G protein-coupled receptor	0.0978745	11 / 14
Glucagon	GCG	P01275	CHEMBL5736	Unclassified protein	0.0978745	56 / 0
Neprilysin (by homology)	MME	P08473	CHEMBL1944	Protease	0.0978745	8 / 0
G protein-coupled receptor 44	PTGDR2	Q9Y5Y4	CHEMBL5071	Family A G protein-coupled receptor	0.0978745	258 / 0
Nuclear receptor ROR-gamma	RORC	P51449	CHEMBL1741186	Nuclear receptor	0.0978745	8 / 10
Nuclear receptor ROR-alpha	RORA	P35398	CHEMBL5868	Nuclear receptor	0.0978745	1 / 4
Interleukin-6	IL6	P05231	CHEMBL1795129	Secreted protein	0.0978745	0 / 1
Glutamine synthetase	GLUL	P15104	CHEMBL4612	Ligase	0.0978745	0 / 1
Acyl coenzyme A:cholesterol acyltransferase	CES1	P23141	CHEMBL2265	Enzyme	0.0978745	1 / 5
Carboxylesterase 2	CES2	O00748	CHEMBL3180	Enzyme	0.0978745	1 / 15
Glucagon receptor	GCGR	P47871	CHEMBL1985	Family B G protein-coupled receptor	0.0978745	210 / 0
Epoxide hydrolase 1	EPHX1	P07099	CHEMBL1968	Protease	0.0978745	12 / 0
Diacylglycerol O-acyltransferase 1	DGAT1	O75907	CHEMBL6009	Enzyme	0.0978745	197 / 0
p53-binding protein Mdm-2	MDM2	Q00987	CHEMBL5023	Other nuclear protein	0.0978745	59 / 0
Prostanoid EP4 receptor (by homology)	PTGER4	P35408	CHEMBL1836	Family A G protein-coupled receptor	0.0978745	222 / 6
Estradiol 17-beta-dehydrogenase 2	HSD17B2	P37059	CHEMBL2789	Enzyme	0.0978745	0 / 2
Integrin alpha-V/beta-3	ITGAV ITGB3	P06756 P05106	CHEMBL1907598	Membrane receptor	0.0978745	81 / 0
Translocator protein (by homology)	TSPO	P30536	CHEMBL5742	Membrane receptor	0.0978745	4 / 0
DNA topoisomerase I	TOP1	P11387	CHEMBL1781	Isomerase	0.0978745	2 / 2
Adenosine A1 receptor (by homology)	ADORA1	P30542	CHEMBL226	Family A G protein-coupled receptor	0.0978745	33 / 0
Metabotropic glutamate receptor 2 (by homology)	GRM2	Q14416	CHEMBL5137	Family C G protein-coupled receptor	0.0978745	60 / 0
Sphingosine 1-phosphate receptor Edg-1	S1PR1	P21453	CHEMBL4333	Family A G protein-coupled receptor	0.0978745	60 / 0
Thyroid hormone receptor alpha	THRA	P10827	CHEMBL1860	Nuclear receptor	0.0978745	27 / 0
Thyroid hormone receptor beta-1	THRB	P10828	CHEMBL1947	Nuclear receptor	0.0978745	27 / 0
Cathepsin S	CTSS	P25774	CHEMBL2954	Protease	0.0978745	12 / 0
Ileal bile acid transporter	SLC10A2	Q12908	CHEMBL2778	Electrochemical transporter	0.0978745	20 / 0
Intercellular adhesion molecule (ICAM-1), Integrin alpha-L/beta-2	ITGAL ICAM1 ITGB2	P20701 P05362 P05107	CHEMBL2096661	Membrane receptor	0.0978745	16 / 0

## Sheet: 11-Methoxycurvularin
Target Key	Target Name	Description	P-Value	MaxTC
C[C@H]1CCCC(CC(=O)C2=C(CC(=O)O1)C=C(C=C2O)O)OC
compound_1
Q8IDJ8_PLAF7		Lysine--tRNA ligase	4.195e-89	0.44
FUT4_HUMAN	FUT4	Alpha-(1,3)-fucosyltransferase 4	7.101e-36	0.28
Q8I2S7_PLAF7		3-oxoacyl-[acyl-carrier-protein] reductase	7.101e-36	0.28
T2R31_HUMAN	TAS2R31	Taste receptor type 2 member 31	2.23e-33	0.33
G6PD_YEAST	ZWF1	Glucose-6-phosphate 1-dehydrogenase	4.137e-29	0.28
SIAT6_HUMAN	ST3GAL3	CMP-N-acetylneuraminate-beta-1,4-galactoside alpha-2,3-sialyltransferase	4.185e-23	0.28
PGAM1_HUMAN	PGAM1	Phosphoglycerate mutase 1	6.556e-18	0.28
Q965D6_PLAFA	fabG	3-oxoacyl-acyl-carrier protein reductase	1.981e-17	0.28
6PGD_HUMAN	PGD	6-phosphogluconate dehydrogenase, decarboxylating	2.22e-15	0.28
Q965D7_PLAFA	fabZ	Beta-hydroxyacyl-ACP dehydratase	1.477e-14	0.28
FUT7_HUMAN	FUT7	Alpha-(1,3)-fucosyltransferase 7	4.846e-13	0.28
ACVL1_HUMAN	ACVRL1	Serine/threonine-protein kinase receptor R3	2.055e-12	0.41
MCR_RAT	Nr3c2	Mineralocorticoid receptor	2.65e-12	0.47
CBS_HUMAN	CBS	Cystathionine beta-synthase	1.309e-10	0.28
CBR1_HUMAN	CBR1	Carbonyl reductase [NADPH] 1	4.059e-10	0.38
MTSI_SPISQ	sssIM	CPG DNA methylase	4.155e-09	0.28
PGFRA_HUMAN	PDGFRA	Platelet-derived growth factor receptor alpha	2.226e-08	0.35
M3K7_HUMAN	MAP3K7	Mitogen-activated protein kinase kinase kinase 7	4.604e-07	0.34
CP1B1_HUMAN	CYP1B1	Cytochrome P450 1B1	1.018e-06	0.37
PLAP_HUMAN	PLAA	Phospholipase A-2-activating protein	1.241e-06	0.3
MP2K6_HUMAN	MAP2K6	Dual specificity mitogen-activated protein kinase kinase 6	1.905e-06	0.33
SwissTargetPrediction
Target	Common name	Uniprot ID	ChEMBL ID	Target Class	Probability*	Known actives (3D/2D)
Nuclear receptor subfamily 4 group A member 1	NR4A1	P22736	CHEMBL1293229	Nuclear receptor	0.118277	0 / 1
Bromodomain-containing protein 4	BRD4	O60885	CHEMBL1163125	Reader	0.101614	61 / 0
CREB-binding protein/p53	CREBBP	Q92793	CHEMBL5747	Writer	0.101614	12 / 0
Neprilysin	MME	P08473	CHEMBL1944	Protease	0.101614	14 / 0
Matrix metalloproteinase 3	MMP3	P08254	CHEMBL283	Protease	0.101614	141 / 0
Matrix metalloproteinase 9	MMP9	P14780	CHEMBL321	Protease	0.101614	237 / 0
Matrix metalloproteinase 1	MMP1	P03956	CHEMBL332	Protease	0.101614	307 / 0
ADAM17	ADAM17	P78536	CHEMBL3706	Protease	0.101614	146 / 0
Matrix metalloproteinase 13	MMP13	P45452	CHEMBL280	Protease	0.101614	168 / 0
Matrix metalloproteinase 7	MMP7	P09237	CHEMBL4073	Protease	0.101614	52 / 0
Matrix metalloproteinase 8	MMP8	P22894	CHEMBL4588	Protease	0.101614	114 / 0
Dopamine D4 receptor	DRD4	P21917	CHEMBL219	Family A G protein-coupled receptor	0.101614	20 / 0
Dopamine D3 receptor	DRD3	P35462	CHEMBL234	Family A G protein-coupled receptor	0.101614	17 / 0
Serine/threonine-protein kinase PIM1	PIM1	P11309	CHEMBL2147	Kinase	0.101614	39 / 2
Carbonic anhydrase III	CA3	P07451	CHEMBL2885	Lyase	0.101614	2 / 1
Carbonic anhydrase XIII (by homology)	CA13	Q8N1Q1	CHEMBL3912	Lyase	0.101614	20 / 2
Carbonic anhydrase I	CA1	P00915	CHEMBL261	Lyase	0.101614	89 / 0
Carbonic anhydrase XIV	CA14	Q9ULX7	CHEMBL3510	Lyase	0.101614	24 / 0
Carbonic anhydrase IV	CA4	P22748	CHEMBL3729	Lyase	0.101614	23 / 0
Carbonic anhydrase VB	CA5B	Q9Y2D0	CHEMBL3969	Lyase	0.101614	12 / 0
Carbonic anhydrase VA	CA5A	P35218	CHEMBL4789	Lyase	0.101614	18 / 0
Serine/threonine-protein kinase mTOR	MTOR	P42345	CHEMBL2842	Kinase	0.101614	104 / 0
PI3-kinase p110-alpha subunit	PIK3CA	P42336	CHEMBL4005	Enzyme	0.101614	231 / 0
Eukaryotic translation initiation factor 2-alpha kinase 3	EIF2AK3	Q9NZJ5	CHEMBL6030	Kinase	0.101614	26 / 0
Cyclin-dependent kinase 1/cyclin B	CCNB3 CDK1 CCNB1 CCNB2	Q8WWL7 P06493 P14635 O95067	CHEMBL2094127	Other cytosolic protein	0.101614	11 / 0
Cyclin-dependent kinase 2/cyclin A	CDK2 CCNA1 CCNA2	P24941 P78396 P20248	CHEMBL2094128	Other cytosolic protein	0.101614	29 / 0
Ribosomal protein S6 kinase alpha 3	RPS6KA3	P51812	CHEMBL2345	Kinase	0.101614	6 / 0
Tyrosine kinase non-receptor protein 2	TNK2	Q07912	CHEMBL4599	Kinase	0.101614	9 / 0
Poly [ADP-ribose] polymerase-1	PARP1	P09874	CHEMBL3105	Enzyme	0.101614	63 / 0
Alkaline phosphatase, tissue-nonspecific isozyme	ALPL	P05186	CHEMBL5979	Enzyme	0.101614	8 / 0
Phospholipase A-2-activating protein	PLAA	Q9Y263	CHEMBL6114	Unclassified protein	0.101614	1 / 0
Inosine-5'-monophosphate dehydrogenase 2	IMPDH2	P12268	CHEMBL2002	Oxidoreductase	0.101614	68 / 0
Tyrosine-protein kinase JAK1	JAK1	P23458	CHEMBL2835	Kinase	0.101614	139 / 0
Solute carrier family 22 member 12	SLC22A12	Q96S37	CHEMBL6120	Electrochemical transporter	0.101614	6 / 0
Tyrosine-protein kinase JAK3	JAK3	P52333	CHEMBL2148	Kinase	0.101614	105 / 0
Tyrosine-protein kinase TYK2	TYK2	P29597	CHEMBL3553	Kinase	0.101614	44 / 0
Tyrosine-protein kinase JAK2	JAK2	O60674	CHEMBL2971	Kinase	0.101614	158 / 0
Plectin	PLEC	Q15149	CHEMBL1293240	Unclassified protein	0.101614	1 / 0
Neuropeptide Y receptor type 5	NPY5R	Q15761	CHEMBL4561	Family A G protein-coupled receptor	0.101614	13 / 0
DNA-dependent protein kinase	PRKDC	P78527	CHEMBL3142	Kinase	0.101614	23 / 0
GABA-A receptor; alpha-3/beta-3/gamma-2	GABRB3 GABRA3 GABRG2	P28472 P34903 P18507	CHEMBL2094120	Ligand-gated ion channel	0.101614	10 / 0
GABA-A receptor; alpha-1/beta-3/gamma-2	GABRB3 GABRG2 GABRA1	P28472 P18507 P14867	CHEMBL2094121	Ligand-gated ion channel	0.101614	10 / 0
GABA-A receptor; alpha-5/beta-3/gamma-2	GABRB3 GABRG2 GABRA5	P28472 P18507 P31644	CHEMBL2094122	Ligand-gated ion channel	0.101614	13 / 0
GABA-A receptor; alpha-2/beta-3/gamma-2	GABRA2 GABRB3 GABRG2	P47869 P28472 P18507	CHEMBL2094130	Ligand-gated ion channel	0.101614	10 / 0
GABA-A receptor; alpha-6/beta-3/gamma-2	GABRG2 GABRB3 GABRA6	P18507 P28472 Q16445	CHEMBL2095190	Ligand-gated ion channel	0.101614	2 / 0
Carboxypeptidase B	CPB1	P15086	CHEMBL2552	Protease	0.101614	1 / 0
Tankyrase-2	TNKS2	Q9H2K2	CHEMBL6154	Enzyme	0.101614	8 / 0
Tankyrase-1	TNKS	O95271	CHEMBL6164	Enzyme	0.101614	1 / 0
Platelet activating factor receptor	PTAFR	P25105	CHEMBL250	Family A G protein-coupled receptor	0.101614	32 / 0
PI3-kinase p110-beta subunit	PIK3CB	P42338	CHEMBL3145	Enzyme	0.101614	60 / 0
PI3-kinase p110-gamma subunit	PIK3CG	P48736	CHEMBL3267	Enzyme	0.101614	80 / 0
Phosphatidylinositol-4-phosphate 3-kinase C2 domain-containing beta polypeptide	PIK3C2B	O00750	CHEMBL5554	Enzyme	0.101614	4 / 0
Signal transducer and activator of transcription 3	STAT3	P40763	CHEMBL4026	Transcription factor	0.101614	9 / 0
Lysine-specific histone demethylase 1	KDM1A	O60341	CHEMBL6136	Eraser	0.101614	5 / 0
Serine/threonine-protein kinase/endoribonuclease IRE1	ERN1	O75460	CHEMBL1163101	Enzyme	0.101614	17 / 0
Histone deacetylase 2	HDAC2	Q92769	CHEMBL1937	Eraser	0.101614	36 / 0
Histone deacetylase 1	HDAC1	Q13547	CHEMBL325	Eraser	0.101614	85 / 0
Calpain 1	CAPN1	P07384	CHEMBL3891	Protease	0.101614	22 / 0
Cyclin-dependent kinase 9	CDK9	P50750	CHEMBL3116	Kinase	0.101614	8 / 0
Leucine-rich repeat serine/threonine-protein kinase 2	LRRK2	Q5S007	CHEMBL1075104	Kinase	0.101614	127 / 0
Catechol O-methyltransferase	COMT	P21964	CHEMBL2023	Transferase	0.101614	12 / 0
LDL-associated phospholipase A2	PLA2G7	Q13093	CHEMBL3514	Enzyme	0.101614	35 / 0
Sodium channel protein type IX alpha subunit	SCN9A	Q15858	CHEMBL4296	Voltage-gated ion channel	0.101614	280 / 0
Cyclin-dependent kinase 2	CDK2	P24941	CHEMBL301	Kinase	0.101614	69 / 0
Cyclin-dependent kinase 1	CDK1	P06493	CHEMBL308	Kinase	0.101614	65 / 0
Cyclin-dependent kinase 5/CDK5 activator 1	CDK5R1 CDK5	Q15078 Q00535	CHEMBL1907600	Kinase	0.101614	43 / 0
Sodium/glucose cotransporter 1	SLC5A1	P13866	CHEMBL4979	Electrochemical transporter	0.101614	1 / 0
Bromodomain-containing protein 2	BRD2	P25440	CHEMBL1293289	Reader	0.101614	13 / 0
Phosphodiesterase 10A	PDE10A	Q9Y233	CHEMBL4409	Phosphodiesterase	0.101614	215 / 0
Indoleamine 2,3-dioxygenase	IDO1	P14902	CHEMBL4685	Enzyme	0.101614	11 / 7
Inhibitor of apoptosis protein 3	XIAP	P98170	CHEMBL4198	Other cytosolic protein	0.101614	11 / 0
Gamma-secretase	PSEN2 PSENEN NCSTN APH1A PSEN1 APH1B	P49810 Q9NZ42 Q92542 Q96BI3 P49768 Q8WW43	CHEMBL2094135	Protease	0.101614	82 / 0
PI3-kinase p110-delta subunit	PIK3CD	O00329	CHEMBL3130	Enzyme	0.101614	48 / 0
GABA receptor alpha-5 subunit	GABRA5	P31644	CHEMBL5112	Ligand-gated ion channel	0.101614	10 / 0
DNA topoisomerase II alpha	TOP2A	P11388	CHEMBL1806	Isomerase	0.101614	1 / 0
Sulfonylurea receptor 2	ABCC9	O60706	CHEMBL1971	Primary active transporter	0.101614	33 / 0
Epidermal growth factor receptor erbB1	EGFR	P00533	CHEMBL203	Kinase	0.101614	130 / 0
Kinesin-1 heavy chain/ Tyrosine-protein kinase receptor RET	RET	P07949	CHEMBL2041	Kinase	0.101614	14 / 0
Tyrosine-protein kinase LCK	LCK	P06239	CHEMBL258	Kinase	0.101614	17 / 0
Caspase-8	CASP8	Q14790	CHEMBL3776	Protease	0.101614	72 / 0
MAP kinase ERK2	MAPK1	P28482	CHEMBL4040	Kinase	0.101614	140 / 0
MAP kinase signal-integrating kinase 2	MKNK2	Q9HBH9	CHEMBL4204	Kinase	0.101614	13 / 0
ALK tyrosine kinase receptor	ALK	Q9UM73	CHEMBL4247	Kinase	0.101614	6 / 0
Caspase-1	CASP1	P29466	CHEMBL4801	Protease	0.101614	102 / 0
Ephrin receptor	EPHB4	P54760	CHEMBL5147	Kinase	0.101614	12 / 0
Tyrosine-protein kinase ABL	ABL1	P00519	CHEMBL1862	Kinase	0.101614	30 / 0
Tyrosine-protein kinase HCK	HCK	P08631	CHEMBL3234	Kinase	0.101614	9 / 0
Estrogen receptor beta	ESR2	Q92731	CHEMBL242	Nuclear receptor	0.101614	115 / 17
Alpha-2a adrenergic receptor	ADRA2A	P08913	CHEMBL1867	Family A G protein-coupled receptor	0.101614	20 / 0
Cyclin-dependent kinase 2/cyclin E	CCNE2 CDK2 CCNE1	O96020 P24941 P24864	CHEMBL2094126	Other cytosolic protein	0.101614	34 / 0
Heat shock protein HSP 90-alpha	HSP90AA1	P07900	CHEMBL3880	Other cytosolic protein	0.101614	19 / 0
Adenosine A2a receptor	ADORA2A	P29274	CHEMBL251	Family A G protein-coupled receptor	0.101614	82 / 0
Adenosine A2b receptor	ADORA2B	P29275	CHEMBL255	Family A G protein-coupled receptor	0.101614	44 / 0
Transient receptor potential cation channel subfamily M member 8 (by homology)	TRPM8	Q7Z2W7	CHEMBL1075319	Voltage-gated ion channel	0.101614	4 / 0
Tyrosyl-DNA phosphodiesterase 2	TDP2	O95551	CHEMBL2169736	Enzyme	0.101614	15 / 0
Phosphodiesterase 4B	PDE4B	Q07343	CHEMBL275	Phosphodiesterase	0.101614	17 / 0
Inhibitor of nuclear factor kappa B kinase beta subunit	IKBKB	O14920	CHEMBL1991	Kinase	0.101614	9 / 0
Voltage-gated L-type calcium channel alpha-1C subunit	CACNA1C	Q13936	CHEMBL1940	Voltage-gated ion channel	0.101614	19 / 0
EWS-Fli1 protein	EWS-Fli1	Q16198	CHEMBL2010625	Unclassified protein	0.101614	1 / 0
Serotonin 2a (5-HT2a) receptor	HTR2A	P28223	CHEMBL224	Family A G protein-coupled receptor	0.101614	31 / 0

[truncated: 108 more sheets: 2-(4-Hydroxyphenyl)propionic ac, 2,3-Bis(3,4-dihydroxybenzyl)but, 2,3-Dihydroxypropyl (E)-3-(3,4-, 2,4-Dioxopentanedioic acid, 20(R)-Ginsenoside Rh2 (54580480, 2-Amino-1-methyl-6-phenylimidaz, 2-Hydroxy-3-(4-hydroxyphenyl)pr, 2-Hydroxy-3-(5-hydroxy-1H-indol, 2-Imino-1-methylimidazolidin-4-, 3-(3,4-Dihydroxyphenyl)-2-hydro, 3-(3-Hydroxyphenyl)propanoic ac, 3-(4-Hydroxyphenyl)propionic ac, 3,4-Dihydroxybenzoic acid (72, , 3,4-Dihydroxyphenylacetic acid , 3-Hydroxy-4-methoxybenzenepropa, 3-Hydroxybenzoic acid (7420, HM, 3-Hydroxyphenethyl alcohol (834, 3-Indolepropionic acid (3744, H, 3-Phenylpropionic acid (107, CH, 4-Hydroxy-(3',4'-dihydroxypheny …]
