# Supplementary material for: A Network Pharmacology and Molecular-Docking-Based Approach to Identify the Probable Targets of Short-Chain Fatty-Acid-Producing Microbial Metabolites against Kidney Cancer and Inflammation
Source: Biomolecules. 2023 Nov 20;13(11):1678. doi: 10.3390/biom13111678 (PMC10669250; doi:10.3390/biom13111678)
Supplement: Supplementary file 1 [file biomolecules-13-01678-s001.zip › supplementary/Supplementary S2. Kidney cancer and inflammation database (diseases targets).xlsx]

## Sheet: All diseases_Kidney _Gene ID
Disease name	Gene ID
Renal Cell Carcinoma	FLCN
	EPAS1
	PTEN
	VHL
	OGG1
	PTGS2
	NF2
	MTOR
	MITF
	PIK3CA
	TFE3
	TP53
	TSC1
	BAP1
	ELOC
	HNF1B
	SLC49A4
	HNF1A
	KEAP1
	RNF139
	ERBB2
	ALK
	GJB1
	SETD2
	GSTM1
	GSTT1
	IL6
	KRT7
	MET
	PBRM1
	PRCC
	TGM2
	TSC2
	TNFSF10
	ADIPOQ
	SCARB1
	FLT1
	GSTP1
	BIRC7
	IL13
	DAPK1
	BIRC5
	ANXA4
	APAF1
	APRT
	L1CAM
	POMC
	PVALB
	SFRP2
	SLC2A1
	ALOX5
	HSPB1
	IFNA2
	IL4R
	PAK1
	SOD2
	NDRG1
	BTG3
	CRABP1
	ALDH1A1
	ACHE
	PGK1
	BCHE
	RELA
	KDM5C
	CASP2
	UNC5C
	ACY1
	CDKN2A
	CPQ
	AKAP13
	CSMD3
	LRRK2
	CNN2
	CRYAB
	ASB15
	DNHD1
	CTSB
	CTSD
	FAAH2
	EEF2
	ALAD
	PDXDC1
	SYNE2
	PRAME
	ALOX12B
	YIPF3
	PNKD
	OR4C13
	VMO1
	GRB7
	HARS1
	HSPA9
	HSPD1
	MSGN1
	IL6R
	FAM111B
	KCNMA1
	KRT8
	KRT32
	LDHB
	M6PR
	MUC4
	MYC
	PEBP1
	SHANK1
	PDHB
	LRP1B
	TET2
	PIDD1
	AP5M1
	FMN2
	SPTBN4
	RYR1
	SLC5A3
	AHNAK
	MLLT10
	LMAN2L
	CAPG
	TAGLN2
	CARD11
	CRADD
	FPGT
	INPP4B
	NAV3
	RPL14
	ZNF765
	NLRP12
	ZNF804A
	ZNF536
	CUL7
	CYP1A1
	CDKN2B
	IGFBP7
	IGF1R
	TXNIP
	ANXA1
	ANXA2
	PTGS1
	CTNNB1
	AKT1
	FH
	FN1
	IFNG
	PPAT
	CCND1
	SDHB
	NFE2L2
	HNF4A
	MAP2K1
	SDHD
	ITPR2
	TMEM127
	SDHA
	SDHC
	ZEB2
	DLC1
	FGFR3
	APC
	ATM
	PVT1
	STK11
	KLLN
	KIF1B
	INSR
	MAX
	NRAS
	RET
	RHEB
	SRC
	BUB1
	BUB1B
	COL14A1
	DPF3
	AXIN2
	SEC23B
	LINC02068
	SF3B2
	FAF1
	RASSF1
	ANAPC16
	SLCO6A1
	CRP
	CSF2
	POGLUT3
	CTLA4
	DCC
	DLST
	EGF
	EGFR
	EP300
	EPO
	EZH2
	FHIT
	PDZD2
	TBC1D9
	RHOBTB2
	DICER1
	SF3B1
	FOLH1
	SMUG1
	ZNF620
	H2AZ1-DT
	POT1
	CD274
	HIF1A
	HLA-G
	IFNA1
	IFNA13
	IGF1
	IL2
	IL4
	CXCL8
	IL10
	AR
	GSTK1
	MALAT1
	KDR
	KIT
	MIR21
	MIR210
	MDH2
	MDM2
	MME
	MMP2
	MMP9
	MYO7B
	PAX2
	PCNA
	PDCD1
	ABCB1
	PIK3CB
	PIK3CD
	PIK3CG
	SDHAF2
	STEAP3
	LARP6
	AXL
	PTHLH
	BCL2
	STAT3
	TERT
	TFDP2
	TGFA
	TGFB1
	TNF
	VDR
	VEGFA
	VIM
	CA9
	CXCR4
	ASPSCR1
	TFEB
	AAGAB
	SLC25A11
	CD38
	CD44
	ESR1
	AMACR
	HPGDS
	HLA-A
	CASP3
	CDKN1B
	CLU
	SARDH
	HGF
	IGFBP3
	IL1B
	MIR126
	MST1
	COX2
	MUC1
	BHD
	CCL2
	TIMP1
	COL18A1
	CASP8
	CCK
	ABCG2
	HOTAIR
	MTCO2P12
	CTSK
	ESR2
	HAVCR1
	GSK3B
	MIR200C
	MIR34A
	MLH1
	NFKB1
	MIR429
	B2M
	MIR451A
	ACTB
	S100A1
	SFPQ
	SFRP1
	SMARCB1
	TIMP2
	XRCC1
	PAX8
	CFLAR
	TMED7-TICAM2
	CDKN1A
	SDS
	H3P10
	PARP1
	DNMT1
	APEH
	TICAM2
	JAK2
	MIR141
	MIR145
	MIR205
	MIR30A
	SMAD4
	MCL1
	MKI67
	MMP1
	YBX1
	TMED7
	PECAM1
	SORD
	BSG
	TGFBI
	HAVCR2
	CAV1
	PROM1
	CD70
	CIB1
	ZNRD2
	DCTN6
	H3P23
	DAB2IP
	CYP1B1
	EIF4EBP1
	EPOR
	ALB
	HEPACAM
	GABPA
	DKK3
	HLA-C
	XIAP
	IFI27
	FAS
	CXCR2
	IL18
	KRAS
	LGALS3
	MIR106B
	MIR155
	MIR200A
	MIR203A
	MMP7
	PDGFRB
	PLAU
	MAPK1
	MAPK8
	PSMD9
	NDRG2
	MIB1
	CXCL12
	MUL1
	PDCD1LG2
	CDH6
	MICA
	CDK4
	SPINT2
	KHDRBS1
	FAM107A
	EGLN3
	PLIN2
	ABCC2
	CBLL2
	E2F1
	EDN1
	EDNRB
	EPHA3
	EPHB2
	FABP7
	BRD4
	XRCC6
	GATA3
	ANGPT2
	HILPDA
	HDAC1
	HLA-DRB1
	HMOX1
	IFNB1
	IL16
	ITGA5
	CD82
	KRT19
	LEP
	LOXL2
	LINC01194
	MIR15A
	MIR221
	MIR222
	MIR27A
	MMP3
	ABCC1
	MIR338
	MSH2
	MT1G
	MTHFR
	NEDD9
	CCN3
	MIR378A
	SERPINE1
	PRKN
	FOXP3
	NDUFA13
	APH1A
	PKM
	KRT20
	PPARG
	TUG1
	FBXW7
	PRKAA1
	PRKAB1
	PRKCA
	BRK1
	ACSS2
	MAPK3
	BAX
	MOK
	REN
	SOX2
	SOX4
	SPP1
	BRAF
	AURKA
	TAP1
	TEK
	TGFBR2
	TIMP3
	TLR1
	TWIST1
	KDM6A
	VTCN1
	RBM10
	SPOP
	CD80
	CD40LG
	CD68
	CDH1
	MIR877
	CD24
	HOTTIP
	CDK2
	MAD2L2
	SIX2
	NES
	CISH
	COL11A2
	MAP3K8
	CLDN7
	GATA5
	ACE
	DES
	AGT
	EIF4E
	PTK2B
	FGF2
	FOXM1
	FOXO1
	SIRT1
	SEC14L2
	NUP62
	ALPP
	GC
	BBC3
	RPS6KA6
	GNAS
	CXCR3
	GPT
	GRP
	GSTM2
	GTF2H1
	HMGB1
	HSPA4
	ICAM1
	IFNAR2
	KLK3
	ILK
	CXCL10
	KISS1
	LDHA
	LEPR
	LHX1
	C17orf97
	MIR106A
	MIR122
	MIR125A
	MIR183
	MIR195
	MIR200B
	MIR204
	MIR206
	MIR22
	MIR224
	MIR29B1
	MIR29B2
	SMAD2
	MAGEA6
	MFAP1
	KITLG
	MIP
	NME1
	NONO
	NOTCH1
	NTRK1
	ROR2
	DUXAP8
	NOX4
	ADIPOR1
	DCTN4
	MED15
	PFN1
	PLK1
	POU2F2
	POU5F1
	PPBP
	TESC
	PRKAA2
	DIABLO
	SLC12A9
	ACKR3
	PTK2
	RAF1
	RARB
	RNASE3
	GAS5
	S100A9
	MARCKSL1
	UCA1
	BMP6
	SLC22A3
	SLC22A2
	SMARCA1
	BNIP3
	BRCA1
	SST
	ST14
	TPM1
	TPM3
	TYMS
	UCHL1
	VPS51
	VCAM1
	VCL
	VEGFC
	EZR
	CA12
	JADE1
	WLS
	HMGA2
	ARHGAP24
	CASR
	CAV2
	TNFRSF10B
	TNFRSF10A
	SQSTM1
	CCNB1
	MBD2
	SOCS3
	CLDN8
	CBFA2T2
	CD40
	CDK1
	RBX1
	CDH3
	TEC
	SYCE1L
	TRAP
	RBM14-RBM4
	RPL17-C18orf32
	RAB4B-EGLN2
	PTPRU
	CDH15
	CDH16
	G3BP1
	PSME3
	ADAM10
	TRIM13
	CDK7
	CDK2AP2
	GHET1
	AKR1A1
	IRF9
	YAP1
	RBM14
	MCRS1
	HOXB13
	NXF1
	CEBPB
	POSTN
	MTHFD2
	NEU3
	CCL27
	HPSE
	PGRMC1
	LILRB1
	SUB1
	RALBP1
	LOC110013312
	IL24
	RPP14
	FSTL1
	WIF1
	EGLN2
	LNCARSR
	CYTOR
	KLF8
	LNCRNA-ATB
	UCN3
	H3P8
	COL4A3
	OSR1
	COMT
	KLF6
	CREB1
	CRHBP
	A2ML1
	VCAN
	CST3
	ABCA13
	CYP2D6
	DEFB1
	NQO1
	AGTR1
	EDNRA
	EEF1A1
	EGR1
	AHR
	EPHA2
	ENG
	AKT2
	ETFA
	EWSR1
	F2R
	F2RL1
	FCGR3A
	FCGR3B
	FGFR2
	SMG1
	NCOA6
	KDM6B
	MLANA
	FLNB
	KANK1
	ARC
	FOS
	SNHG1
	PLA2G15
	ALOX12
	ALOX15
	IL27
	CASC2
	GAD1
	QPCT
	ATRNL1
	GAS6
	MAGEA2B
	AMPD1
	CACYBP
	DKK2
	PDCD4
	PDLIM3
	ANGPTL3
	NEAT1
	ANGPT1
	DLL1
	LAMTOR2
	NR3C1
	UHRF1
	OBP2A
	ANXA5
	HMMR
	NR4A1
	HP
	HRAS
	HSPA1A
	HSPA1B
	HSPA2
	HSPA5
	HTC2
	TNC
	IRF8
	APOE
	IGF2
	IGFBP2
	IGFBP4
	CCN1
	IL1A
	IL2RA
	IL7
	AQP1
	IDO1
	IRF1
	ITGB1
	JUN
	KLK1
	KIF22
	LOX
	MIRLET7D
	MIR100
	MIR10B
	MIR130B
	MIR137
	MIR142
	MIR144
	MIR146A
	MIR150
	MIR17
	MIR181A2
	MIR182
	MIR191
	MIR193A
	MIR199B
	MIR211
	MIR212
	MIR215
	MIR216A
	MIR23A
	MIR23B
	MIR29A
	MIR29C
	MIR30B
	MIR30C2
	MIR31
	MIR34B
	MIR96
	MIR99A
	EPCAM
	MXD1
	SMAD3
	MAGEA2
	MCM2
	MDM4
	MAP3K5
	CXCL9
	MMP13
	MRC1
	MIR372
	ASS1
	MSMB
	MST1R
	MT1E
	NBN
	ATHS
	NELL1
	ATP1A1
	NFKB2
	NNMT
	ACR
	NT5E
	MIR384
	MIR425
	P2RY1
	PCDH8
	ANGPTL4
	PDGFA
	PDK1
	SF3B6
	MPC1
	ENPP2
	ENPP3
	PDPK1
	PGF
	SLC25A3
	PIK3R1
	IL17D
	POLR2A
	PON1
	EGLN1
	TRPM7
	NAT10
	PACC1
	MEG3
	HIF1AN
	KDM3A
	PRKCZ
	MYDGF
	MAP2K7
	RETN
	PSMB6
	SMYD2
	PSMB8
	PSMB9
	CHPT1
	RAB25
	RALGAPB
	PTBP1
	MIR363
	PTH
	MIR452
	MIR489
	MIR497
	PTH1R
	MIR499A
	MIR509-1
	KLHL1
	CIP2A
	PTPRG
	CXCL16
	REG1A
	ROCK1
	RPL17
	RPS6
	MIR486-1
	S100A10
	S100B
	CCL7
	CCL18
	SELE
	GOLPH3
	SET
	SFRP4
	SFRP5
	POU5F1P3
	SH3BP2
	POU5F1P4
	ST3GAL4
	CDCP1
	BMP2
	SKP2
	SLC2A4
	SLC5A2
	SLC12A3
	SLPI
	SNAI2
	SNAI1
	SNCA
	FSCN1
	SOX9
	SPARC
	STRN
	BST2
	ADAM17
	TAP2
	TAZ
	TCF4
	MIR411
	MIR590
	TCF7L2
	TRBV20OR9-2
	PRDX2
	TEP1
	TFAP2A
	TFRC
	TGFB2
	TGFBR1
	THBS1
	THRB
	TIAM1
	C1QBP
	TM7SF2
	TP73
	TRPC6
	TTR
	CCR2
	VEGFB
	YY1
	ZFX
	MANF
	FSD1
	LAP
	CDC73
	L2HGDH
	DHDDS
	ZC3H12A
	ASRGL1
	PPP1R2C
	WNT10A
	CD276
	CALR
	MAP1LC3B
	ARID1A
	SLC25A18
	FSD1L
	TMPRSS13
	KAT8
	CASP9
	ACSS1
	KISS1R
	ACCS
	RIOX2
	RGS5
	PPM1D
	NUDCD1
	USO1
	RUNX3
	EIF3D
	BECN1
	RIPK1
	ADAM9
	TNFRSF6B
	NRP1
	NR1I2
	APLN
	SPHK1
	LMLN
	NOL3
	SPAG9
	SLC16A4
	SLC16A3
	EBAG9
	MTDH
	PIWIL1
	SLIT2
	ACVRL1
	MUC16
	AIM2
	CD34
	CD47
	SPATA2
	DLEC1
	MED12
	NAT2
	ADA
	CDH2
	AKT3
	CDKN2B-AS1
	OCTN3
	SRA1
	VTRNA2-1
	MIR216B
	MIR942
	MIR708
	MIR543
	EGOT
	HDAC6
	LINC00887
	KIR2DS2
	FILNC1
	BCL2L11
	GNE
	UBAC2-AS1
	CDH5
	MIR1233-1
	MIR1291
	MIR1236
	FTX
	CHAF1A
	MIR1260B
	THORLNC
	GIHCG
	EGFR-AS1
	TRIM52-AS1
	LOC100507703
	TMX2-CTNND1
	BCL2L2-PABPN1
	AP1M2
	ABCB6
	CDH8
	CDH9
	CDH11
	COMETT
	ADAM8
	SGK2
	PANDAR
	CDH13
	ARL4C
	OPTN
	NAMPT
	MBNL2
	PLIN3
	STX6
	CDK8
	SPRY2
	ZMPSTE24
	ZFPM2-AS1
	STAG1
	CDKN1C
	TPTEP2-CSNK1E
	DLEU1
	TNIP1
	CDKN3
	CNPY2
	TUBB3
	MYL9
	RACK1
	GPNMB
	CEACAM5
	ATG7
	RNASEH2A
	ANP32B
	SPTLC1
	SLC34A2
	NPC2
	AHSA1
	P3H4
	RBCK1
	IGF2BP1
	IGF2BP3
	CXCR6
	GNA13
	TNFSF13B
	CETN1
	EBP
	USP39
	HSPH1
	CGB3
	CEACAM3
	PDE10A
	ADAM28
	CEACAM7
	PPARGC1A
	STIP1
	CKAP4
	LNCSRLR
	FERMT2
	GCN1
	COPS5
	KLK11
	RCC1
	TPPP
	LOC110806263
	MNS16A
	ESM1
	HNRNPUL1
	CHEK1
	PTPRT
	TBC1D8
	CORO1A
	CHI3L1
	PSIP1
	CHI3L2
	BAZ1A
	MAP4K1
	CHEK2
	PRRT2
	LINC02605
	MED8
	PARK7
	GPR182
	ACOT7
	TRIM9
	NLRP3
	MAL2
	CIRBP
	H3P42
	H3P47
	CTHRC1
	FOXP4
	LRRC3B
	CMTM5
	CKS1B
	TWIST2
	GSTO2
	SERPINA3
	CLN3
	CYP2R1
	TMEM52B
	CLTC
	H4-16
	CCR3
	CCR4
	CNR2
	COL3A1
	TSACC
	COL5A1
	COL6A3
	RBM45
	AADAC
	COL11A1
	COL15A1
	ADH7
	KCNH8
	ZFP42
	ADM
	ADORA1
	UBE2QL1
	ADORA2A
	COX8A
	CP
	FAM92A
	UNC5D
	RALYL
	CRABP2
	ATF2
	CRH
	CRHR2
	CRK
	MUC17
	SELENOM
	UBE2F
	KRT72
	SRXN1
	CRYGD
	CRYZ
	MAPK14
	CSE1L
	CSF1
	CSF1R
	CSNK1E
	PWAR1
	TTBK2
	DIRAS1
	SYT6
	CCN2
	CTNNA1
	CTNND1
	PROM2
	CTSG
	GPBAR1
	BTLA
	CUX1
	CXADR
	SPINK13
	CYLD
	AMOT
	CYP3A5
	SPAAR
	ASS1P3
	CYP24A1
	CYP27B1
	DACH1
	DAG1
	CCDC60
	SLFN5
	DCN
	DCR
	DDC
	DDT
	DNAJB8
	DECR1
	DEFA1
	RASSF6
	DFFA
	GLIS3
	DNAJB1P1
	DKC1
	DLD
	AGER
	DNMT3A
	DNMT3B
	DPP4
	DRD1
	DRD2
	JAG1
	DSG2
	DUSP1
	DUSP9
	DVL2
	APLNR
	E2F3
	ECE1
	TYMP
	S1PR1
	EDN2
	EIF4B
	TXLNA
	ELF5
	ELK1
	TET3
	MARK2
	SLC39A11
	C4orf46
	EN2
	ENO1
	ENO2
	ENPEP
	PRSS55
	NRK
	EPHB4
	ERBB3
	ERBB4
	ERCC2
	ERCC4
	ERG
	ESRRA
	ESRRB
	ESRRG
	ETV1
	F2
	ABCD1
	F2RL2
	F3
	F12
	FBLN1
	UNC5B
	FBN1
	FBN2
	SKA1
	MARCHF8
	ALDH3B1
	KDM1B
	SCUBE3
	ALDH9A1
	FGB
	FGF5
	ALDOA
	FGFR1
	FGFR4
	FKBP1A
	FKBP1AP1
	FKBP1AP2
	FKBP1AP3
	VASH1
	FKBP1AP4
	MLXIP
	FKBP4
	ALDOB
	PLA2R1
	SIRT2
	DKK1
	FOXI1
	SPEN
	ZNF609
	AVL9
	KDM4C
	FOXO3
	FLNA
	FLT3
	FLT4
	MCF2L
	PPP1R13B
	SIRT3
	KCNH4
	HEY1
	TRAM1
	MACF1
	DAAM2
	CABIN1
	SRRM2
	CORO1C
	TMEFF2
	SGK3
	CADM1
	C3CER1
	ALPI
	FRZB
	FTH1
	FNDC5
	RICTOR
	CADM2
	G6PC
	G6PD
	GABPB1
	MXRA5
	RNF19A
	AMBP
	GALNT2
	GALNT3
	NCR3
	RWDD3
	KANK2
	GAPDH
	LRIG1
	CHD5
	POLDIP2
	PRPF31
	INTS1
	DGCR5
	PHGDH
	FBXO22
	GATM
	ANKRD2
	LATS2
	GH1
	GHR
	GHRH
	GHSR
	LAT
	PELP1
	NSG1
	B3GAT1
	DKK4
	HSPB7
	AGO2
	GPC3
	PCDH17
	RBMS3
	STK39
	GLI1
	SGSM3
	GLI2
	HTRA2
	GLS
	PCLO
	GNAI1
	GNAO1
	GNG4
	GOT2
	ANG
	KLHL35
	CISD3
	IGHV1-12
	SNHG15
	DLX6-AS1
	FAM83H
	TRIM59
	GRK5
	GPX1
	GPX3
	GPX4
	GRB2
	TMEM176B
	NOB1
	COMMD5
	HIPK2
	ANPEP
	UBE2T
	PYCARD
	GRM1
	MYLIP
	GRM4
	GRM5
	SLC25A5
	GRPR
	GSK3A
	MSH6
	GTF2H4
	CARD10
	TFCP2L1
	SENP1
	CNOT7
	GPSM2
	UBIAD1
	PSAT1
	NOP53
	GZMB
	H2AX
	HAS1
	HFE
	HGFAC
	CD209
	ANXA6
	HIC1
	HK2
	ACACA
	HLA-B
	HLA-E
	HMGCR
	HMGA1
	FOXA1
	HNRNPK
	HOXA11
	HOXB@
	HOXB1
	HOXB2
	HOXB3
	HOXB4
	HOXB5
	HOXB6
	HOXB7
	HOXB8
	HOXB9
	HOXC11
	HPN
	RAB37
	AGFG1
	HRES1
	PRMT1
	APEX1
	BIRC2
	HSD11B2
	BIRC3
	HSPB2
	DNAJB1
	APLP2
	IAPP
	TREML3P
	IFN1@
	IFNA17
	ACTBL2
	LINC01193
	IGFBP5
	IGFBP6
	IKBKB
	IL1RN
	FASLG
	CXCR1
	IL10RA
	IL11
	IL13RA2
	IL15
	TNFRSF9
	IL17A
	FOXK2
	AQP4
	INHA
	INHBA
	AQP6
	INSRR
	ISG20
	ITGA1
	ITGA2B
	ITGA7
	ABCC6
	ITGAV
	ITGB2
	ITGB8
	ITK
	ITPR1
	JUP
	KHK
	KIR2DL2
	KIR2DL3
	KLK2
	KLRC1
	ARG1
	KIFC1
	KPNA2
	ARG2
	RHOB
	TMIGD1
	ACAT2
	LAG3
	LAIR1
	LAMA4
	LAMP2
	LCN1
	LCN2
	LDHC
	LDLR
	LETM1
	LGALS1
	LGALS3BP
	ARHGDIB
	LIFR
	LIG1
	ASIC2
	LMNA
	FENDRR
	LNPEP
	LRP2
	LRPAP1
	LSAMP
	ARNT
	MIRLET7B
	MIRLET7C
	MIRLET7F2
	MIRLET7I
	MIR107
	MIR10A
	MIR124-3
	MIR129-2
	MIR132
	MIR134
	MIR136
	MIR143
	MIR148A
	MIR154
	MIR15B
	MIR184
	MIR186
	MIR192
	MIR196A1
	MIR196A2
	MIR198
	MIR217
	ARR3
	MIR223
	MIR24-1
	MIR24-2
	MIR26B
	MIR28
	MIR30C1
	MIR30D
	MIR33A
	MIR34C
	MIR17HG
	TNFSF12-TNFSF13
	ARRB2
	SMAD5
	MAGEA4
	MAGEA9
	MAGEB2
	STS
	MAOB
	MAT2A
	MB
	MCAM
	MCM3
	MCM4
	MCM5
	MCM6
	MGMT
	MGP
	MIF
	MAP3K9
	KMT2A
	NR3C2
	MMP11
	MMP14
	MMP16
	POTEKP
	XRCC6P5
	MIR133B
	MIR302C
	MIR328
	MIR335
	MIR337
	MIR342
	MIR346
	MIR373
	MSH3
	MT1A
	MT1H
	MT1M
	MTAP
	COX1
	ND3
	MTNR1A
	MUC3A
	MMUT
	MYCL
	MYCN
	MYH9
	MYL2
	ATF4
	NCAM1
	ACLY
	ATIC
	NDUFS1
	NEDD8
	NEFH
	NEK1
	NELL2
	NEU1
	NFATC1
	NFIA
	NFIC
	NGFR
	ATP1B1
	NME2
	NOS1
	NOS2
	NPY
	NOTCH3
	NPM1
	NPTX2
	NUCB2
	MIR375
	MIR376A1
	TNFRSF11B
	SLC22A18
	OVOL1
	DUXAP9
	PAEP
	PAFAH1B1
	PRDX1
	DEF6
	GEMIN4
	PCBP2
	DERL2
	SERPINA5
	GAL
	CHCHD2
	ING4
	SDF4
	EGFL7
	LEF1
	CHMP1A
	NUSAP1
	TLR7
	PDC
	TNFRSF12A
	ZBTB7A
	ANGPT4
	SFMBT1
	SIRT6
	PDGFRA
	GDE1
	TRIM33
	NUB1
	ATP5MC2
	RAB23
	PDZK1
	WWOX
	RSF1
	PGR
	PIM1
	PIK3R2
	PIN1
	PIP
	PITX1
	PITX2
	PLAUR
	PLCL1
	PLD2
	PLG
	PLOD2
	PLXNB1
	PMAIP1
	PML
	CDHR5
	PMS2
	TREM2
	POU3F2
	PPARA
	UGT1A1
	TMED9
	XAF1
	PPP1R12C
	ERCC6L
	ESRP1
	ANKHD1
	SARS2
	RNF125
	PINX1
	TMEM45A
	AVP
	CEP55
	MAP1S
	IMP3
	QRSL1
	RNF121
	LAPTM4B
	H4C15
	SAGE1
	KCNQ1DN
	RBM38
	PNRC2
	NLRP2
	PRKAR1A
	CCAR1
	PRKCB
	PAG1
	PRKCH
	CAND1
	CMAS
	PRKDC
	SULF2
	SLC50A1
	PDGFC
	PRKX
	PRNP
	SUSD2
	PARD3
	TRPV5
	METTL3
	KLK7
	PRSS8
	KLK10
	PSEN1
	TWNK
	PANX2
	MUC13
	PSG2
	PNO1
	PYY
	FAM20C
	CHMP1B
	MAN1C1
	PSMD10
	ZMIZ1
	SLC39A10
	CEMIP
	PTCH1
	DANCR
	PTGER4
	RAB22A
	MIR362
	MIR20B
	HNP1
	SCYL1
	MIR488
	MIR490
	MIR146B
	MIR495
	MIR193B
	MIR505
	MIR508
	MIR510
	STAMBPL1
	ARRDC3
	FNIP2
	EP400
	TRIB3
	PTPN6
	HAMP
	MUC3B
	PTPRC
	PTPRZ1
	PXN
	BBS2
	PYCR1
	LY6G6D
	RAB5A
	RAC1
	RAG2
	ACTA2
	RAN
	RAP1B
	RAP1GAP
	RAP2A
	RAP2B
	RARRES1
	RB1
	HIVEP3
	KDM5A
	RBP1
	RBP2
	RBP4
	RCVRN
	BCL2A1
	BCL2L1
	BCL2L2
	RHO
	RIT2
	RING1
	RIT1
	SAV1
	RNPEP
	KLKP1
	FKBP10
	ROBO1
	OPN1SW
	RPE65
	MIR455
	RPS6KB1
	RPS15A
	RRM2
	RXRA
	RXRG
	S100A4
	S100A5
	S100A8
	S100A11
	S100A12
	SAG
	MAPK12
	SATB1
	BGLAP
	SCNN1B
	CEACAM1
	SRL
	CCL11
	CCL22
	CXCL11
	CXCL5
	SEA
	SELP
	SEMG1
	POTEM
	SELENOW
	SNHG6
	ERAP2
	ROBO3
	COP1
	HIF3A
	H3P16
	PIK3CD-AS1
	LINC00461
	SH3GL2
	BNC1
	FBXW4
	GORASP1
	COPS7B
	SHOX2
	SMURF2
	TNS3
	DDX31
	BMI1
	ST3GAL2
	USP46
	CENPH
	MRPL41
	ACD
	WNK1
	SLC2A2
	SLC2A3
	BMP4
	SLC3A2
	SLC6A3
	CXADRP1
	SLC6A8
	SLC8A1
	SLC9A1
	SLC15A1
	BMPR2
	SMARCA4
	ZSCAN18
	BMX
	SMN1
	SMN2
	SOAT1
	MIR539
	SOX5
	SPAG4
	SPG7
	SPINK1
	SPINT1
	SRPK1
	STAT1
	STAT5A
	STAT5B
	STAT6
	STC1
	STK3
	BRS3
	SYT1
	MAP3K7
	TAPBP
	TCEA1
	TBX3
	TCF3
	MIR572
	MIR588
	MIR613
	MIR622
	MIR630
	MIR646
	ZEB1
	BTG1
	TCF21
	TERC
	TERF1
	TERF2
	TFAP2B
	NR2F2
	TGFBR3
	TIE1
	TIMP4
	TLR3
	TLR4
	ACTG1
	TMSB4X
	TP53BP2
	TPBG
	TPD52
	TPT1
	CRISP2
	TRAF1
	TRAF6
	ACTG2
	TRPC4
	MIR660
	MIR663A
	TSG101
	C5AR1
	MAGED4
	MAGEA9B
	DEFA1B
	TUFM
	NBAT1
	TYK2
	UCN
	UCP1
	UGT1A
	NR1H2
	UQCRFS1
	USP1
	UVRAG
	VASP
	VBP1
	VIP
	TRPV1
	VTN
	NSD2
	WNT2
	WNT7A
	WNT11
	WT1
	XIST
	XPO1
	XRCC4
	CA2
	CA4
	CA8
	MIR766
	ZBTB17
	PRDM2
	BSND
	FZD5
	ST8SIA4
	MAPKAP1
	CALB1
	BHLHE41
	HMGN5
	SLC52A2
	ADIPOR2
	NDNF
	MCPH1
	AIMP2
	RTL10
	ZNF419
	CLIP4
	AGMAT
	CAMKMT
	ARHGEF5
	CALCR
	NANOG
	KAT6A
	ESRP2
	CALM1
	RNF34
	FBXO11
	SCUBE1
	CUBN
	PDGFD
	TET1
	CXXC4
	KCNIP4
	CALM2
	CUL5
	SLC35G2
	FGF23
	CALM3
	KMT2D
	SLC7A5
	TXNDC5
	CDR3
	CHAF1B
	CAPN1
	CAPN2
	KDM5D
	H4C9
	EOMES
	FZD7
	FZD8
	CASP1
	NUF2
	H4C1
	RASSF5
	SOX7
	H4C4
	H4C6
	H4C12
	H4C11
	H4C3
	H4C8
	H4C2
	SESN2
	H4C5
	H4C13
	H4C14
	JAM3
	MAD1L1
	SETDB2
	CCDC8
	SPARCL1
	MAGT1
	MINDY4
	TCHP
	RPAIN
	NR0B2
	AKT1S1
	CAVIN2
	SYVN1
	CUL2
	CUL1
	MAK16
	NT5C1A
	SPZ1
	CAT
	OGT
	PYROXD2
	C19orf48
	CORO6
	UBASH3B
	PPFIA4
	SNHG7
	SNHG12
	YBX3
	APOL1
	SSH2
	MKNK1
	RUNX2
	TNFSF11
	TP63
	RTCA
	AKR1C3
	SOCS1
	DYNLL1
	IRS2
	EIF3C
	CBL
	SLC4A4
	PEA15
	ABCC3
	TNFSF13
	TNFSF12
	CBS
	DLK1
	NRP2
	CCN4
	CDK5R1
	PER2
	ARHGEF7
	KRIT1
	TIMELESS
	CCNC
	FOXH1
	CCND2
	CCND3
	WNT3A
	CCNE1
	HSPB3
	SELENBP1
	LIMD1
	NAT1
	ACVR1
	F2RL3
	CCNG2
[truncated: 30,636 more rows]

## Sheet: Conventional Renal carcinoma
Disease	Disease_id	Gene	Gene_id	UniProt	Gene_Full_Name	Protein_Class	N_diseases_g	DSI_g	DPI_g	pLI	Score_gda	EL_gda	EI_gda	N_PMIDs	N_SNPs_gda	First_Ref	Last_Ref
Conventional (Clear Cell) Renal Cell Carcinoma	C0279702	FLCN	201163	Q8NFG4	folliculin		160	0.537	0.885	0.78892	0.9		0.938	16	8	2002	2020
Conventional (Clear Cell) Renal Cell Carcinoma	C0279702	VHL	7428	P40337	von Hippel-Lindau tumor suppressor	Enzyme	372	0.443	0.846	0.079515	0.8		0.972	289	14	1989	2019
Conventional (Clear Cell) Renal Cell Carcinoma	C0279702	HNF1A	6927	P20823	HNF1 homeobox A	Nucleic acid binding	292	0.478	0.846	0.96115	0.72	strong	1	2	5	1994	1999
Conventional (Clear Cell) Renal Cell Carcinoma	C0279702	SETD2	29072	Q9BYW2	SET domain containing 2, histone lysine methyltransferase	Epigenetic regulator	447	0.424	0.846	1	0.7		0.957	47	0	2003	2019
Conventional (Clear Cell) Renal Cell Carcinoma	C0279702	PBRM1	55193	Q86U86	polybromo 1	Epigenetic regulator	105	0.566	0.615	1	0.7		1	56	1	2011	2020
Conventional (Clear Cell) Renal Cell Carcinoma	C0279702	OGG1	4968	O15527	8-oxoguanine DNA glycosylase		313	0.453	0.808	3.9314e-12	0.64		1	4	2	2003	2011
Conventional (Clear Cell) Renal Cell Carcinoma	C0279702	MTOR	2475	P42345	mechanistic target of rapamycin kinase	Kinase	960	0.343	0.885	1	0.6		0.984	64	0	2005	2020
Conventional (Clear Cell) Renal Cell Carcinoma	C0279702	MET	4233	P08581	MET proto-oncogene, receptor tyrosine kinase	Kinase	594	0.38	0.846	0.96998	0.6		0.969	32	2	1999	2020
Conventional (Clear Cell) Renal Cell Carcinoma	C0279702	TSC1	7248	Q92574	TSC complex subunit 1		391	0.44	0.808	1	0.6		1	14	0	1995	2020
Conventional (Clear Cell) Renal Cell Carcinoma	C0279702	KDM5C	8242	P41229	lysine demethylase 5C		119	0.581	0.538	1	0.6		1	11	0	2011	2017
Conventional (Clear Cell) Renal Cell Carcinoma	C0279702	BAP1	8314	Q92560	BRCA1 associated protein 1	Enzyme	299	0.454	0.731	0.99443	0.6		0.982	56	0	2011	2019
Conventional (Clear Cell) Renal Cell Carcinoma	C0279702	HNF1B	6928	P35680	HNF1 homeobox B	Nucleic acid binding	279	0.473	0.808	0.99976	0.55		0.833	6	0	1999	2017
Conventional (Clear Cell) Renal Cell Carcinoma	C0279702	EPAS1	2034	Q99814	endothelial PAS domain protein 1	Transcription factor	293	0.454	0.731	0.5961	0.4		0.93	57	5	2001	2019
Conventional (Clear Cell) Renal Cell Carcinoma	C0279702	ERBB2	2064	P04626	erb-b2 receptor tyrosine kinase 2	Kinase	995	0.328	0.923	0.0059892	0.4		0.9	10	0	1990	2011
Conventional (Clear Cell) Renal Cell Carcinoma	C0279702	ALK	238	Q9UM73	ALK receptor tyrosine kinase	Kinase	519	0.396	0.846	3.2299e-06	0.4		0.929	14	0	2012	2019
Conventional (Clear Cell) Renal Cell Carcinoma	C0279702	GJB1	2705	P08034	gap junction protein beta 1	Cell-cell junction	224	0.514	0.731	0.84627	0.4		1	10	0	2003	2013
Conventional (Clear Cell) Renal Cell Carcinoma	C0279702	GSTM1	2944	P09488	glutathione S-transferase mu 1		627	0.38	0.923	0.0020641	0.4		0.929	14	0	2000	2018
Conventional (Clear Cell) Renal Cell Carcinoma	C0279702	GSTT1	2952	P30711	glutathione S-transferase theta 1		541	0.393	0.923	0.00014834	0.4		1	13	0	1999	2018
Conventional (Clear Cell) Renal Cell Carcinoma	C0279702	IL6	3569	P05231	interleukin 6		2367	0.248	0.962	0.31536	0.4		0.964	28	0	1993	2019
Conventional (Clear Cell) Renal Cell Carcinoma	C0279702	KDR	3791	P35968	kinase insert domain receptor	Kinase	623	0.378	0.885	0.99982	0.4		0.972	36	0	2001	2019
Conventional (Clear Cell) Renal Cell Carcinoma	C0279702	MITF	4286	O75030	melanocyte inducing transcription factor		244	0.499	0.808	0.98119	0.4		1	12	2	2009	2019
Conventional (Clear Cell) Renal Cell Carcinoma	C0279702	PIK3CA	5290	P42336	phosphatidylinositol-4,5-bisphosphate 3-kinase catalytic subunit alpha	Kinase	1511	0.292	0.923	1	0.4		1	49	0	2006	2019
Conventional (Clear Cell) Renal Cell Carcinoma	C0279702	PTEN	5728	P60484	phosphatase and tensin homolog	Enzyme	1349	0.305	0.923	0.25651	0.4		1	37	0	1998	2020
Conventional (Clear Cell) Renal Cell Carcinoma	C0279702	PTGS2	5743	P35354	prostaglandin-endoperoxide synthase 2	Enzyme	1234	0.314	0.962	0.99597	0.4		1	11	0	2002	2019
Conventional (Clear Cell) Renal Cell Carcinoma	C0279702	TFE3	7030	P19532	transcription factor binding to IGHM enhancer 3		118	0.542	0.654	0.97985	0.4		0.988	82	0	2001	2020
Conventional (Clear Cell) Renal Cell Carcinoma	C0279702	TP53	7157	P04637	tumor protein p53	Transcription factor	2494	0.236	0.962	0.53235	0.4		0.951	81	5	1991	2019
Conventional (Clear Cell) Renal Cell Carcinoma	C0279702	TSC2	7249	P49815	TSC complex subunit 2	Enzyme modulator	410	0.439	0.808	1	0.4		1	13	0	2001	2020
Conventional (Clear Cell) Renal Cell Carcinoma	C0279702	ADIPOQ	9370	Q15848	adiponectin, C1Q and collagen domain containing		679	0.376	0.885	4.6434e-09	0.4		0.9	10	3	2010	2019
Conventional (Clear Cell) Renal Cell Carcinoma	C0279702	TGM2	7052	P21980	transglutaminase 2	Enzyme	315	0.445	0.808	6.8118e-18	0.39		1	10	0	2004	2019
Conventional (Clear Cell) Renal Cell Carcinoma	C0279702	GSTP1	2950	P09211	glutathione S-transferase pi 1		610	0.383	0.923	0.014155	0.38		0.889	9	0	1999	2018
Conventional (Clear Cell) Renal Cell Carcinoma	C0279702	PRCC	5546	Q92733	proline rich mitotic checkpoint control factor		24	0.716	0.231	0.96281	0.38		1	8	0	2001	2019
Conventional (Clear Cell) Renal Cell Carcinoma	C0279702	ELOC	6921	Q15369	elongin C	Enzyme modulator	41	0.656	0.5	0.74421	0.38		1	9	0	2013	2019
Conventional (Clear Cell) Renal Cell Carcinoma	C0279702	TNFSF10	8743	P50591	TNF superfamily member 10	Signaling	445	0.413	0.885	0.13495	0.38		1	9	0	2000	2018
Conventional (Clear Cell) Renal Cell Carcinoma	C0279702	FLT1	2321	P17948	fms related receptor tyrosine kinase 1	Kinase	424	0.419	0.846	0.99983	0.37		1	8	1	2001	2019
Conventional (Clear Cell) Renal Cell Carcinoma	C0279702	MAPK8	5599	P45983	mitogen-activated protein kinase 8	Kinase	520	0.397	0.885	0.99823	0.37		1	7	0	2014	2018
Conventional (Clear Cell) Renal Cell Carcinoma	C0279702	SLC2A1	6513	P11166	solute carrier family 2 member 1	Transporter	687	0.388	0.808	0.9941	0.37		1	8	0	1994	2019
Conventional (Clear Cell) Renal Cell Carcinoma	C0279702	DAPK1	1612	P53355	death associated protein kinase 1	Kinase	249	0.472	0.808	0.99767	0.36		1	6	0	2003	2019
Conventional (Clear Cell) Renal Cell Carcinoma	C0279702	KDM6A	7403	O15550	lysine demethylase 6A	Epigenetic regulator	238	0.498	0.769	1	0.36		1	6	0	2012	2018
Conventional (Clear Cell) Renal Cell Carcinoma	C0279702	IL13	3596	P35225	interleukin 13		587	0.386	0.846	0.014426	0.35		0.8	5	0	1996	2019
Conventional (Clear Cell) Renal Cell Carcinoma	C0279702	KRT7	3855	P08729	keratin 7		287	0.463	0.808	3.0861e-12	0.35		1	7	0	2004	2019
Conventional (Clear Cell) Renal Cell Carcinoma	C0279702	BIRC7	79444	Q96CA5	baculoviral IAP repeat containing 7	Enzyme modulator	59	0.621	0.5	1.1004e-07	0.35		1	6	0	2007	2018
Conventional (Clear Cell) Renal Cell Carcinoma	C0279702	ARID1A	8289	O14497	AT-rich interaction domain 1A		341	0.455	0.846	1	0.35		1	5	0	2013	2019
Conventional (Clear Cell) Renal Cell Carcinoma	C0279702	APAF1	317	O14727	apoptotic peptidase activating factor 1		145	0.525	0.769	9.6242e-06	0.34		1	4	0	2006	2015
Conventional (Clear Cell) Renal Cell Carcinoma	C0279702	APRT	353	P07741	adenine phosphoribosyltransferase		384	0.423	0.846	5.4539e-13	0.33		1	4	0	2002	2018
Conventional (Clear Cell) Renal Cell Carcinoma	C0279702	L1CAM	3897	P32004	L1 cell adhesion molecule		289	0.475	0.769	1	0.33		1	3	0	2011	2017
Conventional (Clear Cell) Renal Cell Carcinoma	C0279702	ATM	472	Q13315	ATM serine/threonine kinase	Kinase	684	0.374	0.885	5.5884e-47	0.33		1	3	4	2013	2018
Conventional (Clear Cell) Renal Cell Carcinoma	C0279702	POMC	5443	P01189	proopiomelanocortin		873	0.356	0.846	0.00011658	0.33		1	4	0	1988	2019
Conventional (Clear Cell) Renal Cell Carcinoma	C0279702	PVALB	5816	P20472	parvalbumin	Calcium-binding protein	148	0.547	0.692	0.086602	0.33		0.75	4	0	2003	2006
Conventional (Clear Cell) Renal Cell Carcinoma	C0279702	SFRP2	6423	Q96HF1	secreted frizzled related protein 2		134	0.544	0.731	0.0016693	0.33		1	3	0	2006	2013
Conventional (Clear Cell) Renal Cell Carcinoma	C0279702	RNF139	11236	Q8WU17	ring finger protein 139		36	0.67	0.423	0.53807	0.32		1	2	0	2005	2007
Conventional (Clear Cell) Renal Cell Carcinoma	C0279702	ALDH1A1	216	P00352	aldehyde dehydrogenase 1 family member A1	Enzyme	270	0.46	0.846	0.95448	0.32		1	3	0	2004	2013
Conventional (Clear Cell) Renal Cell Carcinoma	C0279702	FLT4	2324	P35916	fms related receptor tyrosine kinase 4	Kinase	306	0.457	0.808	1	0.32		1	2	2	2014	2017
Conventional (Clear Cell) Renal Cell Carcinoma	C0279702	ALOX5	240	P09917	arachidonate 5-lipoxygenase	Enzyme	342	0.447	0.885	1.2059e-06	0.32		1	3	0	2005	2018
Conventional (Clear Cell) Renal Cell Carcinoma	C0279702	ANXA4	307	P09525	annexin A4		74	0.599	0.692	1.1858e-08	0.32		1	2	0	2004	2011
Conventional (Clear Cell) Renal Cell Carcinoma	C0279702	HSPB1	3315	P04792	heat shock protein family B (small) member 1		395	0.436	0.808	2.7797e-07	0.32		1	3	0	2004	2014
Conventional (Clear Cell) Renal Cell Carcinoma	C0279702	BIRC5	332	O15392	baculoviral IAP repeat containing 5	Enzyme modulator	199	0.495	0.731	0.055854	0.32		1	3	0	2005	2019
Conventional (Clear Cell) Renal Cell Carcinoma	C0279702	IL4R	3566	P24394	interleukin 4 receptor	Receptor	242	0.474	0.846	0.00023013	0.32		1	4	2	2002	2019
Conventional (Clear Cell) Renal Cell Carcinoma	C0279702	KRT8	3856	P05787	keratin 8		166	0.517	0.654	2.36e-08	0.32		1	3	0	2004	2017
Conventional (Clear Cell) Renal Cell Carcinoma	C0279702	PAK1	5058	Q13153	p21 (RAC1) activated kinase 1	Kinase	221	0.494	0.808	0.0013306	0.32		1	2	0	2007	2015
Conventional (Clear Cell) Renal Cell Carcinoma	C0279702	TMEM127	55654	O75204	transmembrane protein 127		72	0.638	0.615	0.012865	0.32		1	3	0	2014	2017
Conventional (Clear Cell) Renal Cell Carcinoma	C0279702	RELA	5970	Q04206	RELA proto-oncogene, NF-kB subunit	Transcription factor	483	0.406	0.885	0.99948	0.32		1	3	0	2007	2018
Conventional (Clear Cell) Renal Cell Carcinoma	C0279702	SOD2	6648	P04179	superoxide dismutase 2	Enzyme	668	0.379	0.923	0.15499	0.32		1	3	0	2004	2018
Conventional (Clear Cell) Renal Cell Carcinoma	C0279702	TEK	7010	Q02763	TEK receptor tyrosine kinase	Kinase	300	0.462	0.692	1	0.32		1	2	0	2017	2020
Conventional (Clear Cell) Renal Cell Carcinoma	C0279702	KEAP1	9817	Q14145	kelch like ECH associated protein 1		251	0.475	0.808	0.00038766	0.32		1	3	0	2013	2019
Conventional (Clear Cell) Renal Cell Carcinoma	C0279702	NDRG1	10397	Q92597	N-myc downstream regulated 1	Enzyme	225	0.488	0.731	0.011324	0.31		1	2	0	2001	2004
Conventional (Clear Cell) Renal Cell Carcinoma	C0279702	BTG3	10950	Q14201	BTG anti-proliferation factor 3		141	0.528	0.808	0.91582	0.31		1	1	0	2009	2009
Conventional (Clear Cell) Renal Cell Carcinoma	C0279702	CRABP1	1381	P29762	cellular retinoic acid binding protein 1		53	0.631	0.615	0.0058779	0.31		1	1	0	2005	2005
Conventional (Clear Cell) Renal Cell Carcinoma	C0279702	PRAME	23532	P78395	preferentially expressed antigen in melanoma		134	0.531	0.577	2.394e-07	0.31		1	2	0	2005	2014
Conventional (Clear Cell) Renal Cell Carcinoma	C0279702	HSPD1	3329	P10809	heat shock protein family D (Hsp60) member 1		398	0.432	0.808	0.99257	0.31		1	2	0	2004	2019
Conventional (Clear Cell) Renal Cell Carcinoma	C0279702	IFNA2	3440	P01563	interferon alpha 2		355	0.442	0.885		0.31		1	2	0	1996	2014
Conventional (Clear Cell) Renal Cell Carcinoma	C0279702	MUC4	4585	Q99102	mucin 4, cell surface associated		183	0.506	0.769	2.7904e-54	0.31		1	2	0	2013	2016
Conventional (Clear Cell) Renal Cell Carcinoma	C0279702	NF2	4771	P35240	neurofibromin 2		312	0.468	0.885	1	0.31		1	2	0	2012	2015
Conventional (Clear Cell) Renal Cell Carcinoma	C0279702	PEBP1	5037	P30086	phosphatidylethanolamine binding protein 1	Enzyme modulator	181	0.5	0.808	0.09167	0.31		1	2	0	2014	2017
Conventional (Clear Cell) Renal Cell Carcinoma	C0279702	PGK1	5230	P00558	phosphoglycerate kinase 1	Kinase	144	0.542	0.769	0.76537	0.31		1	2	0	2004	2018
Conventional (Clear Cell) Renal Cell Carcinoma	C0279702	CASP2	835	P42575	caspase 2	Enzyme	105	0.565	0.731	0.0015026	0.31		1	1	0	2010	2010
Conventional (Clear Cell) Renal Cell Carcinoma	C0279702	SLC49A4	84925	Q96SL1	solute carrier family 49 member 4	Transporter	13	0.78	0.231	2.2526e-09	0.31		1	1	0	2016	2016
Conventional (Clear Cell) Renal Cell Carcinoma	C0279702	DCLK3	85443	Q9C098	doublecortin like kinase 3	Kinase	47	0.647	0.615	0.13686	0.31		1	1	0	2013	2013
Conventional (Clear Cell) Renal Cell Carcinoma	C0279702	UNC5C	8633	O95185	unc-5 netrin receptor C	Receptor	47	0.65	0.462	0.0008813	0.31		1	1	0	2011	2011
Conventional (Clear Cell) Renal Cell Carcinoma	C0279702	SCARB1	949	Q8WTV0	scavenger receptor class B member 1	Receptor	116	0.559	0.731	0.066228	0.31		1	2	1	2011	2015
Conventional (Clear Cell) Renal Cell Carcinoma	C0279702	CPQ	10404	Q9Y646	carboxypeptidase Q	Enzyme	87	0.579	0.769	1.3154e-14	0.3		1	1	0	2015	2015
Conventional (Clear Cell) Renal Cell Carcinoma	C0279702	MERTK	10461	Q12866	MER proto-oncogene, tyrosine kinase	Kinase	154	0.531	0.692	2.6593e-11	0.3			0	0
Conventional (Clear Cell) Renal Cell Carcinoma	C0279702	AKAP13	11214	Q12802	A-kinase anchoring protein 13		73	0.626	0.615	0.92909	0.3		1	1	0	2011	2011
Conventional (Clear Cell) Renal Cell Carcinoma	C0279702	CSMD3	114788	Q7Z407	CUB and Sushi multiple domains 3		31	0.695	0.5	0.057105	0.3		1	2	0	2011	2013
Conventional (Clear Cell) Renal Cell Carcinoma	C0279702	LRRK2	120892	Q5S007	leucine rich repeat kinase 2	Kinase	231	0.51	0.808	2.5757e-30	0.3		1	1	0	2011	2011
Conventional (Clear Cell) Renal Cell Carcinoma	C0279702	CNN2	1265	Q99439	calponin 2	Cellular structure	36	0.666	0.538	0.024399	0.3		1	1	0	2004	2004
Conventional (Clear Cell) Renal Cell Carcinoma	C0279702	CRYAB	1410	P02511	crystallin alpha B		200	0.515	0.731	0.02247	0.3		1	1	0	2004	2004
Conventional (Clear Cell) Renal Cell Carcinoma	C0279702	ASB15	142685	Q8WXK1	ankyrin repeat and SOCS box containing 15		9	0.792	0.231	1.84e-15	0.3		1	1	0	2011	2011
Conventional (Clear Cell) Renal Cell Carcinoma	C0279702	DNHD1	144132	Q96M86	dynein heavy chain domain 1	Enzyme	8	0.792	0.154	1.2016e-72	0.3		1	1	0	2013	2013
Conventional (Clear Cell) Renal Cell Carcinoma	C0279702	CTSB	1508	P07858	cathepsin B	Enzyme	304	0.457	0.846	5.8819e-11	0.3		1	1	0	2004	2004
Conventional (Clear Cell) Renal Cell Carcinoma	C0279702	CTSD	1509	P07339	cathepsin D	Enzyme	242	0.478	0.846	0.00091747	0.3		1	1	0	2004	2004
Conventional (Clear Cell) Renal Cell Carcinoma	C0279702	FAAH2	158584	Q6GMR7	fatty acid amide hydrolase 2	Enzyme	11	0.821	0.115	1.8917e-21	0.3		1	1	0	2015	2015
Conventional (Clear Cell) Renal Cell Carcinoma	C0279702	EEF2	1938	P13639	eukaryotic translation elongation factor 2	Enzyme	83	0.599	0.731	0.99995	0.3		1	1	0	2004	2004
Conventional (Clear Cell) Renal Cell Carcinoma	C0279702	ERN1	2081	O75460	endoplasmic reticulum to nucleus signaling 1	Kinase	163	0.513	0.808	0.99027	0.3			0	1
Conventional (Clear Cell) Renal Cell Carcinoma	C0279702	ALAD	210	P13716	aminolevulinate dehydratase	Enzyme	135	0.556	0.615	5.6185e-05	0.3		1	1	2	2011	2011
Conventional (Clear Cell) Renal Cell Carcinoma	C0279702	CILK1	22858	Q9UPZ9	ciliogenesis associated kinase 1	Kinase	142	0.545	0.808	1.3376e-05	0.3			0	0
Conventional (Clear Cell) Renal Cell Carcinoma	C0279702	PDXDC1	23042	Q6P996	pyridoxal dependent decarboxylase domain containing 1		24	0.78	0.154	3.4641e-12	0.3		1	1	0	2015	2015
Conventional (Clear Cell) Renal Cell Carcinoma	C0279702	SYNE2	23224	Q8WXH0	spectrin repeat containing nuclear envelope protein 2		91	0.623	0.692	1.6503e-25	0.3		1	1	0	2011	2011
Conventional (Clear Cell) Renal Cell Carcinoma	C0279702	ALOX12B	242	O75342	arachidonate 12-lipoxygenase, 12R type	Enzyme	80	0.603	0.577	0.00075626	0.3		1	1	0	2018	2018
Conventional (Clear Cell) Renal Cell Carcinoma	C0279702	YIPF3	25844	Q9GZM5	Yip1 domain family member 3		6	0.821	0.115	0.14123	0.3		1	1	0	2013	2013
Conventional (Clear Cell) Renal Cell Carcinoma	C0279702	PNKD	25953	Q8N490	PNKD metallo-beta-lactamase domain containing		96	0.615	0.615	4.1392e-08	0.3		1	1	0	2015	2015
Conventional (Clear Cell) Renal Cell Carcinoma	C0279702	OR4C13	283092	Q8NGP0	olfactory receptor family 4 subfamily C member 13	G-protein coupled receptor	6	0.821	0.115	2.5329e-10	0.3		1	1	0	2013	2013
Conventional (Clear Cell) Renal Cell Carcinoma	C0279702	VMO1	284013	Q7Z5L0	vitelline membrane outer layer 1 homolog		6	0.821	0.115	2.1183e-06	0.3		1	1	0	2013	2013
Conventional (Clear Cell) Renal Cell Carcinoma	C0279702	GRB7	2886	Q14451	growth factor receptor bound protein 7	Receptor	71	0.603	0.462	1.3644e-06	0.3		1	1	0	2013	2013
Conventional (Clear Cell) Renal Cell Carcinoma	C0279702	HARS1	3035	P12081	histidyl-tRNA synthetase 1	Enzyme	127	0.569	0.808	2.3839e-06	0.3		1	1	0	2004	2004
Conventional (Clear Cell) Renal Cell Carcinoma	C0279702	HSPA9	3313	P38646	heat shock protein family A (Hsp70) member 9		198	0.502	0.885	0.96852	0.3		1	1	0	2004	2004
Conventional (Clear Cell) Renal Cell Carcinoma	C0279702	MSGN1	343930	A6NI15	mesogenin 1		6	0.821	0.115	0.072006	0.3		1	1	0	2013	2013
Conventional (Clear Cell) Renal Cell Carcinoma	C0279702	IL6R	3570	P08887	interleukin 6 receptor	Signaling	261	0.471	0.846	3.1681e-05	0.3		1	1	0	1995	1995
Conventional (Clear Cell) Renal Cell Carcinoma	C0279702	FAM111B	374393	Q6SJ93	family with sequence similarity 111 member B		33	0.691	0.423	0.098549	0.3		1	1	0	2011	2011
Conventional (Clear Cell) Renal Cell Carcinoma	C0279702	KCNMA1	3778	Q12791	potassium calcium-activated channel subfamily M alpha 1	Ion channel	205	0.518	0.846	0.99731	0.3		1	1	0	2013	2013
Conventional (Clear Cell) Renal Cell Carcinoma	C0279702	KRT32	3882	Q14532	keratin 32		7	0.805	0.192	1.3564e-18	0.3		1	1	0	2013	2013
Conventional (Clear Cell) Renal Cell Carcinoma	C0279702	LDHB	3945	P07195	lactate dehydrogenase B	Enzyme	74	0.604	0.615	4.9734e-06	0.3		1	1	0	2004	2004
Conventional (Clear Cell) Renal Cell Carcinoma	C0279702	M6PR	4074	P20645	mannose-6-phosphate receptor, cation dependent	Receptor	28	0.716	0.269	0.0092215	0.3		1	1	0	2013	2013
Conventional (Clear Cell) Renal Cell Carcinoma	C0279702	ACHE	43	P22303	acetylcholinesterase (Cartwright blood group)	Enzyme	418	0.445	0.885	0.99827	0.3		1	1	0	2008	2008
Conventional (Clear Cell) Renal Cell Carcinoma	C0279702	ROR1	4919	Q01973	receptor tyrosine kinase like orphan receptor 1	Kinase	109	0.552	0.731	0.99645	0.3			0	0
Conventional (Clear Cell) Renal Cell Carcinoma	C0279702	SHANK1	50944	Q9Y566	SH3 and multiple ankyrin repeat domains 1		35	0.678	0.385	1	0.3		1	1	0	2011	2011
Conventional (Clear Cell) Renal Cell Carcinoma	C0279702	PDHB	5162	P11177	pyruvate dehydrogenase E1 subunit beta		21	0.711	0.385	0.15201	0.3		1	1	0	2015	2015
Conventional (Clear Cell) Renal Cell Carcinoma	C0279702	LRP1B	53353	Q9NZR2	LDL receptor related protein 1B		63	0.626	0.615	2.5267e-06	0.3		1	1	0	2011	2011
Conventional (Clear Cell) Renal Cell Carcinoma	C0279702	MYO3A	53904	Q8NEV4	myosin IIIA	Kinase	11	0.78	0.269	1.8056e-45	0.3			0	0
Conventional (Clear Cell) Renal Cell Carcinoma	C0279702	TET2	54790	Q6N021	tet methylcytosine dioxygenase 2		362	0.458	0.808	4.3334e-54	0.3		1	1	0	2013	2013
Conventional (Clear Cell) Renal Cell Carcinoma	C0279702	PIDD1	55367	Q9HB75	p53-induced death domain protein 1		15	0.76	0.231	6.435e-17	0.3		1	1	0	2010	2010
Conventional (Clear Cell) Renal Cell Carcinoma	C0279702	AP5M1	55745	Q9H0R1	adaptor related protein complex 5 subunit mu 1		28	0.695	0.385	1.3325e-09	0.3		1	1	0	2013	2013
Conventional (Clear Cell) Renal Cell Carcinoma	C0279702	RIOK2	55781	Q9BVS4	RIO kinase 2	Kinase	8	0.821	0.154	0.00013402	0.3			0	1
Conventional (Clear Cell) Renal Cell Carcinoma	C0279702	FMN2	56776	Q9NZ56	formin 2		88	0.61	0.538	0.99772	0.3		1	1	0	2011	2011
Conventional (Clear Cell) Renal Cell Carcinoma	C0279702	SPTBN4	57731	Q9H254	spectrin beta, non-erythrocytic 4		35	0.686	0.462	1	0.3		1	1	0	2011	2011
Conventional (Clear Cell) Renal Cell Carcinoma	C0279702	BCHE	590	P06276	butyrylcholinesterase		392	0.447	0.923	1.0643e-13	0.3		1	1	0	2008	2008
Conventional (Clear Cell) Renal Cell Carcinoma	C0279702	RYR1	6261	P21817	ryanodine receptor 1	Ion channel	320	0.489	0.808	1.5944e-29	0.3		1	1	0	2011	2011
Conventional (Clear Cell) Renal Cell Carcinoma	C0279702	CDK15	65061	Q96Q40	cyclin dependent kinase 15	Kinase	37	0.663	0.5	2.2449e-17	0.3			0	0
Conventional (Clear Cell) Renal Cell Carcinoma	C0279702	SLC5A3	6526	P53794	solute carrier family 5 member 3	Transporter	26	0.7	0.423	0.96739	0.3		1	1	0	2015	2015
Conventional (Clear Cell) Renal Cell Carcinoma	C0279702	WNK3	65267	Q9BYP7	WNK lysine deficient protein kinase 3	Kinase	13	0.751	0.346	0.99999	0.3			0	0
Conventional (Clear Cell) Renal Cell Carcinoma	C0279702	BMPR1A	657	P36894	bone morphogenetic protein receptor type 1A	Kinase	203	0.522	0.731	0.90333	0.3			0	0
Conventional (Clear Cell) Renal Cell Carcinoma	C0279702	AHNAK	79026	Q09666	AHNAK nucleoprotein		60	0.623	0.615	0.89827	0.3		1	1	0	2011	2011
Conventional (Clear Cell) Renal Cell Carcinoma	C0279702	BRD3	8019	Q15059	bromodomain containing 3	Epigenetic regulator	42	0.7	0.5	0.97468	0.3			0	0
Conventional (Clear Cell) Renal Cell Carcinoma	C0279702	MLLT10	8028	P55197	MLLT10 histone lysine methyltransferase DOT1L cofactor	Transcription factor	116	0.551	0.462	1	0.3		1	1	0	2013	2013
Conventional (Clear Cell) Renal Cell Carcinoma	C0279702	LMAN2L	81562	Q9H0V9	lectin, mannose binding 2 like	Transporter	59	0.641	0.385	1.9629e-11	0.3		1	1	0	2013	2013
Conventional (Clear Cell) Renal Cell Carcinoma	C0279702	CAPG	822	P40121	capping actin protein, gelsolin like	Cellular structure	111	0.548	0.731	9.357e-14	0.3		1	1	0	2004	2004
Conventional (Clear Cell) Renal Cell Carcinoma	C0279702	TAGLN2	8407	P37802	transgelin 2	Cellular structure	64	0.604	0.577	0.0093548	0.3		1	1	0	2004	2004
Conventional (Clear Cell) Renal Cell Carcinoma	C0279702	CARD11	84433	Q9BXL7	caspase recruitment domain family member 11		89	0.582	0.615	0.99995	0.3		1	1	0	2011	2011
Conventional (Clear Cell) Renal Cell Carcinoma	C0279702	CRADD	8738	P78560	CASP2 and RIPK1 domain containing adaptor with death domain		76	0.619	0.5	0.87862	0.3		1	1	0	2010	2010
Conventional (Clear Cell) Renal Cell Carcinoma	C0279702	FPGT	8790	O14772	fucose-1-phosphate guanylyltransferase		6	0.821	0.115	1.0949e-10	0.3		1	1	0	2013	2013
Conventional (Clear Cell) Renal Cell Carcinoma	C0279702	INPP4B	8821	O15327	inositol polyphosphate-4-phosphatase type II B		90	0.573	0.577	0.55218	0.3		1	1	0	2018	2018
Conventional (Clear Cell) Renal Cell Carcinoma	C0279702	NAV3	89795	Q8IVL0	neuron navigator 3		46	0.653	0.615	1	0.3		1	1	0	2011	2011
Conventional (Clear Cell) Renal Cell Carcinoma	C0279702	RPL14	9045	P50914	ribosomal protein L14	Nucleic acid binding	22	0.722	0.308	0.89508	0.3		1	1	0	2013	2013
Conventional (Clear Cell) Renal Cell Carcinoma	C0279702	ZNF765	91661	Q7L2R6	zinc finger protein 765		6	0.821	0.115	8.6566e-06	0.3		1	1	0	2015	2015
Conventional (Clear Cell) Renal Cell Carcinoma	C0279702	NLRP12	91662	P59046	NLR family pyrin domain containing 12		95	0.569	0.846	3.6493e-28	0.3		1	1	0	2013	2013
Conventional (Clear Cell) Renal Cell Carcinoma	C0279702	ZNF804A	91752	Q7Z570	zinc finger protein 804A		53	0.647	0.654	0.0055255	0.3		1	1	0	2011	2011
Conventional (Clear Cell) Renal Cell Carcinoma	C0279702	ACY1	95	Q03154	aminoacylase 1		62	0.653	0.577	6.9169e-09	0.3		1	1	0	2004	2004
Conventional (Clear Cell) Renal Cell Carcinoma	C0279702	ZNF536	9745	O15090	zinc finger protein 536		20	0.743	0.346	0.99958	0.3		1	1	0	2013	2013
Conventional (Clear Cell) Renal Cell Carcinoma	C0279702	CUL7	9820	Q14999	cullin 7		90	0.633	0.5	2.5916e-21	0.3		1	1	0	2011	2011
Conventional (Clear Cell) Renal Cell Carcinoma	C0279702	CHEK2	11200	O96017	checkpoint kinase 2	Kinase	297	0.46	0.808	1.2103e-24	0.11		0	1	1	2018	2018
Conventional (Clear Cell) Renal Cell Carcinoma	C0279702	NOD2	64127	Q9HC29	nucleotide binding oligomerization domain containing 2	Enzyme	434	0.423	0.923	1.9834e-30	0.11		1	1	0	2019	2019
Conventional (Clear Cell) Renal Cell Carcinoma	C0279702	CDKN2A	1029	P42771;Q8N726	cyclin dependent kinase inhibitor 2A		1314	0.3	0.885	0.39474	0.1		1	18	0	1991	2019
Conventional (Clear Cell) Renal Cell Carcinoma	C0279702	RASSF1	11186	Q9NS23	Ras association domain family member 1	Enzyme modulator	400	0.42	0.808	4.9255e-06	0.1		0.786	14	0	2001	2019
Conventional (Clear Cell) Renal Cell Carcinoma	C0279702	CRP	1401	P02741	C-reactive protein		1483	0.299	0.962	0.0036969	0.1		1	13	0	2005	2019
Conventional (Clear Cell) Renal Cell Carcinoma	C0279702	CTLA4	1493	P16410	cytotoxic T-lymphocyte associated protein 4		722	0.369	0.923	0.94085	0.1		1	13	0	2015	2019
Conventional (Clear Cell) Renal Cell Carcinoma	C0279702	CTNNB1	1499	P35222	catenin beta 1		1368	0.303	0.885	0.99999	0.1		0.958	24	0	2000	2020
Conventional (Clear Cell) Renal Cell Carcinoma	C0279702	EGF	1950	P01133	epidermal growth factor		774	0.357	0.923	8.5294e-17	0.1		0.895	19	1	1990	2018
Conventional (Clear Cell) Renal Cell Carcinoma	C0279702	EGFR	1956	P00533	epidermal growth factor receptor	Kinase	1394	0.295	0.885	0.36837	0.1		0.933	45	0	1989	2019
Conventional (Clear Cell) Renal Cell Carcinoma	C0279702	EPO	2056	P01588	erythropoietin		646	0.381	0.885	0.01125	0.1		1	11	0	2000	2017
Conventional (Clear Cell) Renal Cell Carcinoma	C0279702	AKT1	207	P31749	AKT serine/threonine kinase 1	Kinase	1250	0.311	0.962	0.9759	0.1		0.963	27	0	2008	2020
Conventional (Clear Cell) Renal Cell Carcinoma	C0279702	EZH2	2146	Q15910	enhancer of zeste 2 polycomb repressive complex 2 subunit	Epigenetic regulator	653	0.376	0.885	1	0.1		0.867	15	0	2008	2019
Conventional (Clear Cell) Renal Cell Carcinoma	C0279702	FH	2271	P07954	fumarate hydratase	Enzyme	231	0.489	0.846	0.08824	0.1		0.931	29	0	2003	2020
Conventional (Clear Cell) Renal Cell Carcinoma	C0279702	TBC1D9	23158	Q6ZT07	TBC1 domain family member 9	Enzyme	491	0.399	0.846	2.8039e-05	0.1		1	11	0	1989	2017
Conventional (Clear Cell) Renal Cell Carcinoma	C0279702	MPRIP	23164	Q6WCQ1	myosin phosphatase Rho interacting protein	Enzyme modulator	113	0.556	0.885	0.98078	0.1			0	2
Conventional (Clear Cell) Renal Cell Carcinoma	C0279702	FOLH1	2346	Q04609	folate hydrolase 1	Enzyme	311	0.453	0.885	6.1977e-09	0.1		1	16	0	2017	2019
Conventional (Clear Cell) Renal Cell Carcinoma	C0279702	SMUG1	23583	Q53HV7	single-strand-selective monofunctional uracil-DNA glycosylase 1		1034	0.322	0.923	0.00045154	0.1		1	13	0	2017	2019
Conventional (Clear Cell) Renal Cell Carcinoma	C0279702	HNF1A-AS1	283460		HNF1A antisense RNA 1		70	0.621	0.538		0.1			0	1
Conventional (Clear Cell) Renal Cell Carcinoma	C0279702	CD274	29126	Q9NZQ7	CD274 molecule	Receptor	1011	0.324	0.923	0.01916	0.1		0.987	75	0	2013	2020
Conventional (Clear Cell) Renal Cell Carcinoma	C0279702	HIF1A	3091	Q16665	hypoxia inducible factor 1 subunit alpha	Transcription factor	1044	0.327	0.923	0.9777	0.1		0.957	92	2	2001	2019
Conventional (Clear Cell) Renal Cell Carcinoma	C0279702	HLA-G	3135	P17693	major histocompatibility complex, class I, G		279	0.461	0.769	1.365e-11	0.1		1	11	0	2001	2019
Conventional (Clear Cell) Renal Cell Carcinoma	C0279702	IFNA1	3439	P01562	interferon alpha 1		662	0.371	0.923		0.1		1	10	0	1994	2018
Conventional (Clear Cell) Renal Cell Carcinoma	C0279702	IFNA13	3447	P01562	interferon alpha 13		646	0.374	0.923		0.1		1	10	0	1994	2018
Conventional (Clear Cell) Renal Cell Carcinoma	C0279702	IFNG	3458	P01579	interferon gamma		1519	0.288	0.962	0.47156	0.1		1	10	0	1992	2016
Conventional (Clear Cell) Renal Cell Carcinoma	C0279702	IGF1	3479	P05019	insulin like growth factor 1		1206	0.318	0.885	0.2716	0.1		1	12	1	2005	2019
Conventional (Clear Cell) Renal Cell Carcinoma	C0279702	IL2	3558	P60568	interleukin 2		950	0.336	0.885	0.47968	0.1		1	50	0	1991	2019
Conventional (Clear Cell) Renal Cell Carcinoma	C0279702	IL4	3565	P05112	interleukin 4		996	0.332	0.962	0.0047372	0.1		0.929	14	5	1993	2019
Conventional (Clear Cell) Renal Cell Carcinoma	C0279702	IL10	3586	P22301	interleukin 10		1679	0.281	0.923	0.0058874	0.1		1	11	3	1993	2019
Conventional (Clear Cell) Renal Cell Carcinoma	C0279702	AR	367	P10275	androgen receptor	Nuclear receptor	854	0.351	0.846	0.98837	0.1		1	17	0	2013	2020
Conventional (Clear Cell) Renal Cell Carcinoma	C0279702	MALAT1	378938		metastasis associated lung adenocarcinoma transcript 1		336	0.435	0.846		0.1		1	10	0	2014	2019
Conventional (Clear Cell) Renal Cell Carcinoma	C0279702	MIR126	406913		microRNA 126		305	0.447	0.846		0.1		1	11	0	2012	2019
Conventional (Clear Cell) Renal Cell Carcinoma	C0279702	MIR155	406947		microRNA 155		584	0.384	0.885		0.1		1	10	0	2010	2018
Conventional (Clear Cell) Renal Cell Carcinoma	C0279702	MIR200C	406985		microRNA 200c		202	0.486	0.846		0.1		1	10	0	2008	2019
Conventional (Clear Cell) Renal Cell Carcinoma	C0279702	MIR21	406991		microRNA 21		726	0.363	0.846		0.1		1	33	0	2011	2020
Conventional (Clear Cell) Renal Cell Carcinoma	C0279702	MIR210	406992		microRNA 210		277	0.46	0.846		0.1		1	19	0	2010	2020
Conventional (Clear Cell) Renal Cell Carcinoma	C0279702	MDM2	4193	Q00987	MDM2 proto-oncogene	Nucleic acid binding	702	0.362	0.846	0.99981	0.1		1	17	1	2004	2019
Conventional (Clear Cell) Renal Cell Carcinoma	C0279702	MME	4311	P08473	membrane metalloendopeptidase	Enzyme	470	0.407	0.808	1.465e-18	0.1		1	12	0	2005	2019
Conventional (Clear Cell) Renal Cell Carcinoma	C0279702	MMP2	4313	P08253	matrix metallopeptidase 2	Enzyme	1021	0.333	0.923	0.83878	0.1		0.895	19	0	2004	2019
Conventional (Clear Cell) Renal Cell Carcinoma	C0279702	MMP9	4318	P14780	matrix metallopeptidase 9	Enzyme	1337	0.305	0.923	1.8869e-17	0.1		0.95	20	1	2006	2019
Conventional (Clear Cell) Renal Cell Carcinoma	C0279702	SMIM4	440957	Q8WVI0	small integral membrane protein 4		10	0.89	0.154	0.19943	0.1			0	1
Conventional (Clear Cell) Renal Cell Carcinoma	C0279702	MYC	4609	P01106	MYC proto-oncogene, bHLH transcription factor	Transcription factor	821	0.344	0.923	0.99801	0.1		1	12	0	1985	2019
Conventional (Clear Cell) Renal Cell Carcinoma	C0279702	PCNA	5111	P12004	proliferating cell nuclear antigen	Nucleic acid binding	581	0.382	0.846	0.97606	0.1		1	12	0	1995	2019
Conventional (Clear Cell) Renal Cell Carcinoma	C0279702	PDCD1	5133	Q15116	programmed cell death 1		497	0.402	0.846	0.41706	0.1		1	20	0	2016	2019
Conventional (Clear Cell) Renal Cell Carcinoma	C0279702	ABCB1	5243	P08183	ATP binding cassette subfamily B member 1	Transporter	933	0.344	0.885	1.2564e-05	0.1		1	23	0	1989	2019
Conventional (Clear Cell) Renal Cell Carcinoma	C0279702	PIK3CB	5291	P42338	phosphatidylinositol-4,5-bisphosphate 3-kinase catalytic subunit beta	Kinase	1083	0.322	0.885	0.99964	0.1		1	47	0	2006	2019
Conventional (Clear Cell) Renal Cell Carcinoma	C0279702	PIK3CD	5293	O00329	phosphatidylinositol-4,5-bisphosphate 3-kinase catalytic subunit delta	Kinase	1119	0.319	0.885	0.99999	0.1		1	45	0	2006	2019
Conventional (Clear Cell) Renal Cell Carcinoma	C0279702	PIK3CG	5294	P48736	phosphatidylinositol-4,5-bisphosphate 3-kinase catalytic subunit gamma	Kinase	1101	0.32	0.885	1.4076e-06	0.1		1	47	0	2006	2019
Conventional (Clear Cell) Renal Cell Carcinoma	C0279702	LARP6	55323	Q9BRS8	La ribonucleoprotein 6, translational regulator	Nucleic acid binding	51	0.631	0.5	0.66874	0.1		1	80	0	1998	2019
Conventional (Clear Cell) Renal Cell Carcinoma	C0279702	AXL	558	P30530	AXL receptor tyrosine kinase	Kinase	203	0.489	0.615	0.012951	0.1		1	10	0	2003	2020
Conventional (Clear Cell) Renal Cell Carcinoma	C0279702	CCND1	595	P24385	cyclin D1	Enzyme modulator	859	0.344	0.923	0.89057	0.1		1	17	0	2003	2020
Conventional (Clear Cell) Renal Cell Carcinoma	C0279702	BCL2	596	P10415	BCL2 apoptosis regulator	Signaling	1456	0.291	0.885	0.55903	0.1		0.968	31	0	1997	2019
Conventional (Clear Cell) Renal Cell Carcinoma	C0279702	SDHB	6390	P21912	succinate dehydrogenase complex iron sulfur subunit B	Enzyme	316	0.474	0.846	0.00024397	0.1		0.938	16	2	2003	2019
Conventional (Clear Cell) Renal Cell Carcinoma	C0279702	STAT3	6774	P40763	signal transducer and activator of transcription 3	Nucleic acid binding	1193	0.32	0.923	1	0.1		0.969	32	0	2002	2020
Conventional (Clear Cell) Renal Cell Carcinoma	C0279702	TGFA	7039	P01135	transforming growth factor alpha	Signaling	376	0.432	0.885	0.71981	0.1		1	13	0	1984	2008
Conventional (Clear Cell) Renal Cell Carcinoma	C0279702	TGFB1	7040	P01137	transforming growth factor beta 1	Signaling	1558	0.287	0.962	0.03685	0.1		1	21	0	1997	2020
Conventional (Clear Cell) Renal Cell Carcinoma	C0279702	TNF	7124	P01375	tumor necrosis factor	Signaling	2724	0.231	0.962	0.8033	0.1		1	23	0	1992	2019
Conventional (Clear Cell) Renal Cell Carcinoma	C0279702	VDR	7421	P11473	vitamin D receptor	Nuclear receptor	852	0.352	0.885	1.6787e-05	0.1		0.8	15	4	2002	2020
Conventional (Clear Cell) Renal Cell Carcinoma	C0279702	VEGFA	7422	P15692	vascular endothelial growth factor A	Signaling	1899	0.266	0.923	2.4085e-05	0.1		0.964	223	6	1994	2020
Conventional (Clear Cell) Renal Cell Carcinoma	C0279702	VIM	7431	P08670	vimentin		644	0.372	0.846	0.71255	0.1		0.95	20	0	1999	2019
Conventional (Clear Cell) Renal Cell Carcinoma	C0279702	CA9	768	Q16790	carbonic anhydrase 9		226	0.483	0.731	1.3027e-09	0.1		0.968	63	1	1999	2020
Conventional (Clear Cell) Renal Cell Carcinoma	C0279702	CXCR4	7852	P61073	C-X-C motif chemokine receptor 4	G-protein coupled receptor	739	0.362	0.923	0.017804	0.1		0.95	20	1	2003	2019
Conventional (Clear Cell) Renal Cell Carcinoma	C0279702	TFEB	7942	P19484	transcription factor EB		150	0.527	0.731	0.89931	0.1		1	23	0	2005	2019
Conventional (Clear Cell) Renal Cell Carcinoma	C0279702	CASP3	836	P42574	caspase 3	Enzyme	819	0.351	0.923	0.10017	0.1		1	10	0	2003	2019
Conventional (Clear Cell) Renal Cell Carcinoma	C0279702	CD44	960	P16070	CD44 molecule (Indian blood group)		711	0.363	0.962	2.4476e-07	0.1		0.8	10	0	1994	2019
Conventional (Clear Cell) Renal Cell Carcinoma	C0279702	CSF2	1437	P04141	colony stimulating factor 2	Signaling	1028	0.33	0.962	0.83468	0.09		1	9	0	1997	2019
Conventional (Clear Cell) Renal Cell Carcinoma	C0279702	ELAVL2	1993	Q12926	ELAV like RNA binding protein 2		199	0.486	0.808	0.99514	0.09		1	9	0	2018	2020
Conventional (Clear Cell) Renal Cell Carcinoma	C0279702	ESR1	2099	P03372	estrogen receptor 1	Nuclear receptor	1101	0.324	0.962	0.9992	0.09		1	9	0	2002	2018
Conventional (Clear Cell) Renal Cell Carcinoma	C0279702	FHIT	2272	P49789	fragile histidine triad diadenosine triphosphatase		337	0.444	0.846	0.0057055	0.09		1	9	0	1988	2008
Conventional (Clear Cell) Renal Cell Carcinoma	C0279702	FN1	2335	P02751	fibronectin 1	Signaling	724	0.365	0.962	0.0014045	0.09		1	9	0	1994	2019
Conventional (Clear Cell) Renal Cell Carcinoma	C0279702	MIR141	406933		microRNA 141		179	0.497	0.808		0.09		1	9	0	2008	2018
Conventional (Clear Cell) Renal Cell Carcinoma	C0279702	MIR204	406987		microRNA 204		203	0.487	0.808		0.09		1	9	0	2010	2020
Conventional (Clear Cell) Renal Cell Carcinoma	C0279702	MIR30A	407029		microRNA 30a		218	0.478	0.808		0.09		1	9	0	2014	2019
Conventional (Clear Cell) Renal Cell Carcinoma	C0279702	MIR34A	407040		microRNA 34a		428	0.421	0.846		0.09		1	9	0	2012	2019
Conventional (Clear Cell) Renal Cell Carcinoma	C0279702	PTHLH	5744	P12272	parathyroid hormone like hormone		321	0.453	0.846	0.81146	0.09		1	9	0	1997	2014
Conventional (Clear Cell) Renal Cell Carcinoma	C0279702	TERT	7015	O14746	telomerase reverse transcriptase	Enzyme	703	0.374	0.846	0.99046	0.09		1	9	3	2005	2020
Conventional (Clear Cell) Renal Cell Carcinoma	C0279702	XRCC1	7515	P18887	X-ray repair cross complementing 1		410	0.421	0.923	6.3386e-09	0.09		0.889	9	2	1999	2020
Conventional (Clear Cell) Renal Cell Carcinoma	C0279702	PAX8	7849	Q06710	paired box 8		253	0.477	0.731	0.99869	0.09		1	9	0	2010	2019
Conventional (Clear Cell) Renal Cell Carcinoma	C0279702	DNMT1	1786	P26358	DNA methyltransferase 1	Epigenetic regulator	496	0.406	0.885	1	0.08		0.875	8	2	2011	2018
Conventional (Clear Cell) Renal Cell Carcinoma	C0279702	ESR2	2100	Q92731	estrogen receptor 2	Nuclear receptor	528	0.4	0.923	4.4516e-08	0.08		1	8	0	2013	2018
Conventional (Clear Cell) Renal Cell Carcinoma	C0279702	HAVCR1	26762	Q96D42	hepatitis A virus cellular receptor 1		217	0.489	0.885	8.5105e-07	0.08		1	8	0	2013	2019
Conventional (Clear Cell) Renal Cell Carcinoma	C0279702	CXCL8	3576	P10145	C-X-C motif chemokine ligand 8	Signaling	1254	0.31	0.962	0.00027377	0.08		1	8	0	1998	2018
Conventional (Clear Cell) Renal Cell Carcinoma	C0279702	KIT	3815	P10721	KIT proto-oncogene, receptor tyrosine kinase	Kinase	715	0.366	0.808	0.98087	0.08		0.875	8	0	2005	2019
Conventional (Clear Cell) Renal Cell Carcinoma	C0279702	MIR10B	406903		microRNA 10b		167	0.509	0.808		0.08		1	8	0	2014	2019
Conventional (Clear Cell) Renal Cell Carcinoma	C0279702	COX2	4513	P00403	cytochrome c oxidase subunit II	Enzyme	875	0.352	0.962		0.08		1	8	0	2004	2017
Conventional (Clear Cell) Renal Cell Carcinoma	C0279702	NOTCH1	4851	P46531	notch receptor 1		693	0.369	0.885	1	0.08		1	8	0	2008	2017
Conventional (Clear Cell) Renal Cell Carcinoma	C0279702	PRKN	5071	O60260	parkin RBR E3 ubiquitin protein ligase	Enzyme	409	0.431	0.846	6.9346e-07	0.08		1	8	1	2005	2018
Conventional (Clear Cell) Renal Cell Carcinoma	C0279702	PAX2	5076	Q02962	paired box 2		216	0.495	0.731	0.66999	0.08		0.875	8	0	1995	2013
Conventional (Clear Cell) Renal Cell Carcinoma	C0279702	MIR429	554210		microRNA 429		117	0.544	0.731		0.08		1	8	0	2013	2019
Conventional (Clear Cell) Renal Cell Carcinoma	C0279702	MUL1	79594	Q969V5	mitochondrial E3 ubiquitin protein ligase 1		241	0.473	0.808	1.9108e-06	0.08		1	8	0	2005	2019
Conventional (Clear Cell) Renal Cell Carcinoma	C0279702	CASP8	841	Q14790	caspase 8	Enzyme	480	0.404	0.923	3.7236e-06	0.08		0.875	8	0	2003	2017
Conventional (Clear Cell) Renal Cell Carcinoma	C0279702	CCK	885	P06307	cholecystokinin		326	0.453	0.846	3.3034e-05	0.08		1	8	0	2017	2019
Conventional (Clear Cell) Renal Cell Carcinoma	C0279702	HOTAIR	100124700		HOX transcript antisense RNA		234	0.475	0.769		0.07		1	7	0	2014	2018
Conventional (Clear Cell) Renal Cell Carcinoma	C0279702	YAP1	10413	P46937	Yes associated protein 1	Enzyme modulator	374	0.432	0.808	0.99918	0.07		1	7	0	2014	2020
Conventional (Clear Cell) Renal Cell Carcinoma	C0279702	MTCO2P12	107075310		MT-CO2 pseudogene 12		703	0.368	0.962		0.07		1	7	0	2004	2017
Conventional (Clear Cell) Renal Cell Carcinoma	C0279702	SLCO6A1	133482	Q86UG4	solute carrier organic anion transporter family member 6A1	Transporter	449	0.412	0.885	2.8807e-11	0.07		1	7	0	1994	2017
Conventional (Clear Cell) Renal Cell Carcinoma	C0279702	CBLL2	158506	Q8N7E2	Cbl proto-oncogene like 2	Enzyme	235	0.476	0.808		0.07		1	7	0	2005	2018
Conventional (Clear Cell) Renal Cell Carcinoma	C0279702	ALB	213	P02768	albumin	Transporter	1198	0.317	0.962	0.64329	0.07		1	7	0	2013	2018
Conventional (Clear Cell) Renal Cell Carcinoma	C0279702	DKK3	27122	Q9UBP4	dickkopf WNT signaling pathway inhibitor 3		186	0.5	0.731	4.1049e-06	0.07		1	7	3	2004	2018
Conventional (Clear Cell) Renal Cell Carcinoma	C0279702	HPGDS	27306	O60760	hematopoietic prostaglandin D synthase		570	0.388	0.923	1.8063e-06	0.07		1	7	0	1994	2018
Conventional (Clear Cell) Renal Cell Carcinoma	C0279702	GSK3B	2932	P49841	glycogen synthase kinase 3 beta	Kinase	393	0.43	0.846	0.95571	0.07		1	7	0	2012	2020
Conventional (Clear Cell) Renal Cell Carcinoma	C0279702	HGF	3082	P14210	hepatocyte growth factor	Enzyme	671	0.374	0.885	0.99947	0.07		1	7	0	1999	2018
Conventional (Clear Cell) Renal Cell Carcinoma	C0279702	IL1B	3553	P01584	interleukin 1 beta		1801	0.276	0.962	0.13005	0.07		1	7	1	1998	2020
Conventional (Clear Cell) Renal Cell Carcinoma	C0279702	JAK2	3717	O60674	Janus kinase 2	Kinase	644	0.385	0.885	0.65372	0.07		1	7	0	2012	2019
Conventional (Clear Cell) Renal Cell Carcinoma	C0279702	GSTK1	373156	Q9Y2Q3	glutathione S-transferase kappa 1		445	0.412	0.885	1.9374e-06	0.07		1	7	0	1994	2017
Conventional (Clear Cell) Renal Cell Carcinoma	C0279702	MIR145	406937		microRNA 145		366	0.431	0.846		0.07		1	7	0	2013	2016
Conventional (Clear Cell) Renal Cell Carcinoma	C0279702	MIR205	406988		microRNA 205		210	0.482	0.846		0.07		1	7	0	2014	2019
Conventional (Clear Cell) Renal Cell Carcinoma	C0279702	MIR206	406989		microRNA 206		226	0.477	0.846		0.07		1	7	0	2010	2019
Conventional (Clear Cell) Renal Cell Carcinoma	C0279702	MIR221	407006		microRNA 221		304	0.449	0.846		0.07		1	7	0	2014	2018
Conventional (Clear Cell) Renal Cell Carcinoma	C0279702	NFE2L2	4780	Q16236	nuclear factor, erythroid 2 like 2	Enzyme	823	0.357	0.885	0.0035719	0.07		0.857	7	1	2017	2019
Conventional (Clear Cell) Renal Cell Carcinoma	C0279702	MAPK1	5594	P28482	mitogen-activated protein kinase 1	Kinase	1059	0.33	0.923	0.99698	0.07		1	7	0	2008	2019
Conventional (Clear Cell) Renal Cell Carcinoma	C0279702	MIR451A	574411		microRNA 451a		177	0.505	0.769		0.07		1	7	0	2012	2018
Conventional (Clear Cell) Renal Cell Carcinoma	C0279702	NDRG2	57447	Q9UN36	NDRG family member 2	Enzyme	156	0.518	0.692	2.2044e-05	0.07		1	7	0	2008	2019
Conventional (Clear Cell) Renal Cell Carcinoma	C0279702	CCL2	6347	P13500	C-C motif chemokine ligand 2	Signaling	1157	0.321	0.962	0.60786	0.07		1	7	0	2001	2019
Conventional (Clear Cell) Renal Cell Carcinoma	C0279702	CXCL12	6387	P48061	C-X-C motif chemokine ligand 12		626	0.379	0.846	0.11851	0.07		1	7	0	2006	2017
Conventional (Clear Cell) Renal Cell Carcinoma	C0279702	SFRP1	6422	Q8N474	secreted frizzled related protein 1		227	0.479	0.846	0.96457	0.07		1	7	0	2006	2012
Conventional (Clear Cell) Renal Cell Carcinoma	C0279702	SPP1	6696	P10451	secreted phosphoprotein 1		824	0.353	0.885	2.146e-06	0.07		0.714	7	0	2010	2019
Conventional (Clear Cell) Renal Cell Carcinoma	C0279702	TGFBI	7045	Q15582	transforming growth factor beta induced	Signaling	225	0.484	0.769	5.9686e-08	0.07		1	7	0	2008	2019
Conventional (Clear Cell) Renal Cell Carcinoma	C0279702	PDCD1LG2	80380	Q9BQ51	programmed cell death 1 ligand 2		191	0.496	0.769	1.203e-05	0.07		1	7	0	2017	2019
Conventional (Clear Cell) Renal Cell Carcinoma	C0279702	COL18A1	80781	P39060	collagen type XVIII alpha 1 chain		323	0.449	0.808	1.7414e-10	0.07		1	7	0	2002	2015
Conventional (Clear Cell) Renal Cell Carcinoma	C0279702	PROM1	8842	O43490	prominin 1	Transporter	477	0.41	0.846	1.9485e-22	0.07		0.857	7	0	2010	2019
Conventional (Clear Cell) Renal Cell Carcinoma	C0279702	ABCG2	9429	Q9UNQ0	ATP binding cassette subfamily G member 2 (Junior blood group)	Transporter	420	0.419	0.885	2.0957e-32	0.07		1	7	1	2005	2018
Conventional (Clear Cell) Renal Cell Carcinoma	C0279702	CDKN1A	1026	P38936	cyclin dependent kinase inhibitor 1A		490	0.403	0.769	0.0018575	0.06		0.833	6	0	2009	2016
Conventional (Clear Cell) Renal Cell Carcinoma	C0279702	H3P10	115482713		H3 histone pseudogene 10		769	0.35	0.846		0.06		1	6	0	2008	2019
Conventional (Clear Cell) Renal Cell Carcinoma	C0279702	CLU	1191	P10909	clusterin		412	0.426	0.885	7.8072e-05	0.06		1	6	0	2001	2018
Conventional (Clear Cell) Renal Cell Carcinoma	C0279702	PARP1	142	P09874	poly(ADP-ribose) polymerase 1		565	0.389	0.923	0.00033366	0.06		1	6	0	2004	2019
Conventional (Clear Cell) Renal Cell Carcinoma	C0279702	SARDH	1757	Q9UL12	sarcosine dehydrogenase	Enzyme	166	0.523	0.846	5.2689e-16	0.06		1	6	1	2012	2019
Conventional (Clear Cell) Renal Cell Carcinoma	C0279702	E2F1	1869	Q01094	E2F transcription factor 1	Nucleic acid binding	324	0.441	0.846	0.9877	0.06		1	6	0	2013	2019
Conventional (Clear Cell) Renal Cell Carcinoma	C0279702	EIF4EBP1	1978	Q13541	eukaryotic translation initiation factor 4E binding protein 1	Nucleic acid binding	201	0.494	0.885	0.20762	0.06		1	6	0	2011	2019
Conventional (Clear Cell) Renal Cell Carcinoma	C0279702	EPHA3	2042	P29320	EPH receptor A3	Kinase	193	0.497	0.692	1.1953e-05	0.06		1	6	0	2009	2017
Conventional (Clear Cell) Renal Cell Carcinoma	C0279702	FOXM1	2305	Q08050	forkhead box M1		323	0.441	0.769	0.0007414	0.06		1	6	0	2012	2020
Conventional (Clear Cell) Renal Cell Carcinoma	C0279702	AMACR	23600	Q9UHK6	alpha-methylacyl-CoA racemase		179	0.51	0.769	0.027363	0.06		1	6	0	2001	2017
Conventional (Clear Cell) Renal Cell Carcinoma	C0279702	HLA-A	3105	P04439	major histocompatibility complex, class I, A		672	0.37	0.846	0.0013299	0.06		1	6	0	2004	2017
Conventional (Clear Cell) Renal Cell Carcinoma	C0279702	HNF4A	3172	P41235	hepatocyte nuclear factor 4 alpha	Nuclear receptor	340	0.461	0.808	0.15285	0.06		1	6	0	2005	2020
Conventional (Clear Cell) Renal Cell Carcinoma	C0279702	IGF1R	3480	P08069	insulin like growth factor 1 receptor	Kinase	556	0.399	0.885	0.96799	0.06		1	6	0	2007	2019
Conventional (Clear Cell) Renal Cell Carcinoma	C0279702	KRAS	3845	P01116	KRAS proto-oncogene, GTPase	Enzyme modulator	1213	0.32	0.923	0.00078803	0.06		1	6	1	2011	2019
Conventional (Clear Cell) Renal Cell Carcinoma	C0279702	MIR106B	406900		microRNA 106b		143	0.523	0.808		0.06		1	6	0	2010	2019
Conventional (Clear Cell) Renal Cell Carcinoma	C0279702	MIR122	406906		microRNA 122		250	0.468	0.808		0.06		1	6	0	2010	2019
Conventional (Clear Cell) Renal Cell Carcinoma	C0279702	SMAD4	4089	Q13485	SMAD family member 4	Transcription factor	575	0.401	0.808	0.99881	0.06		1	6	0	2005	2019
Conventional (Clear Cell) Renal Cell Carcinoma	C0279702	MCL1	4170	Q07820	MCL1 apoptosis regulator, BCL2 family member	Signaling	375	0.43	0.808	0.96349	0.06		1	6	0	2017	2019
Conventional (Clear Cell) Renal Cell Carcinoma	C0279702	MMP1	4312	P03956	matrix metallopeptidase 1	Enzyme	589	0.385	0.885	7.7197e-18	0.06		0.667	6	0	2003	2015
Conventional (Clear Cell) Renal Cell Carcinoma	C0279702	NFKB1	4790	P19838	nuclear factor kappa B subunit 1	Transcription factor	551	0.396	0.923	1	0.06		0.833	6	1	1996	2020
Conventional (Clear Cell) Renal Cell Carcinoma	C0279702	PECAM1	5175	P16284	platelet and endothelial cell adhesion molecule 1	Cell adhesion	396	0.426	0.846		0.06		1	6	0	2004	2019
Conventional (Clear Cell) Renal Cell Carcinoma	C0279702	PKM	5315	P14618	pyruvate kinase M1/2	Kinase	237	0.482	0.808	0.8549	0.06		1	6	0	2016	2019
Conventional (Clear Cell) Renal Cell Carcinoma	C0279702	PPARG	5468	P37231	peroxisome proliferator activated receptor gamma	Nuclear receptor	877	0.358	0.885	0.029194	0.06		1	6	2	2001	2019
Conventional (Clear Cell) Renal Cell Carcinoma	C0279702	MAPK3	5595	P27361	mitogen-activated protein kinase 3	Kinase	647	0.379	0.885	0.036884	0.06		1	6	0	2012	2018
Conventional (Clear Cell) Renal Cell Carcinoma	C0279702	PVT1	5820		Pvt1 oncogene		190	0.495	0.731		0.06		1	6	0	2017	2019
Conventional (Clear Cell) Renal Cell Carcinoma	C0279702	ACTB	60	P60709	actin beta	Cellular structure	1110	0.325	0.923	0.98564	0.06		1	6	0	2005	2018
Conventional (Clear Cell) Renal Cell Carcinoma	C0279702	ROCK1	6093	Q13464	Rho associated coiled-coil containing protein kinase 1	Kinase	157	0.513	0.731	1	0.06		0.833	6	1	2011	2018
Conventional (Clear Cell) Renal Cell Carcinoma	C0279702	SMARCA1	6594	P28370	SWI/SNF related, matrix associated, actin dependent regulator of chromatin, subfamily a, member 1	Enzyme	183	0.504	0.808	1	0.06		1	6	0	2013	2018
Conventional (Clear Cell) Renal Cell Carcinoma	C0279702	TIMP1	7076	P01033	TIMP metallopeptidase inhibitor 1	Enzyme modulator	603	0.38	0.885	0.4993	0.06		0.833	6	0	2006	2019
Conventional (Clear Cell) Renal Cell Carcinoma	C0279702	TIMP2	7077	P16035	TIMP metallopeptidase inhibitor 2	Enzyme modulator	404	0.425	0.846	0.78893	0.06		0.667	6	0	2006	2019
Conventional (Clear Cell) Renal Cell Carcinoma	C0279702	SPOP	8405	O43791	speckle type BTB/POZ protein		72	0.597	0.5	0.99922	0.06		1	6	0	2014	2019
Conventional (Clear Cell) Renal Cell Carcinoma	C0279702	HAVCR2	84868	Q8TDQ0	hepatitis A virus cellular receptor 2		299	0.45	0.808	0.03866	0.06		1	6	0	2012	2019
Conventional (Clear Cell) Renal Cell Carcinoma	C0279702	CAV1	857	Q03135	caveolin 1	Enzyme modulator	633	0.388	0.885	0.008274	0.06		1	6	1	2003	2017
Conventional (Clear Cell) Renal Cell Carcinoma	C0279702	SPHK1	8877	Q9NYA1	sphingosine kinase 1	Kinase	236	0.48	0.808	3.0327e-07	0.06		1	6	0	2015	2019
Conventional (Clear Cell) Renal Cell Carcinoma	C0279702	SLC16A4	9122	O15374	solute carrier family 16 member 4	Transporter	114	0.55	0.731	9.6707e-08	0.06		1	6	0	2012	2018
Conventional (Clear Cell) Renal Cell Carcinoma	C0279702	SLC16A3	9123	O15427	solute carrier family 16 member 3	Transporter	122	0.542	0.731	0.00029385	0.06		1	6	0	2012	2018
Conventional (Clear Cell) Renal Cell Carcinoma	C0279702	CD38	952	P28907	CD38 molecule	Enzyme	473	0.407	0.885	2.3129e-06	0.06		1	6	0	1989	2003
Conventional (Clear Cell) Renal Cell Carcinoma	C0279702	CD70	970	P32970	CD70 molecule		127	0.542	0.692	0.010394	0.06		1	6	0	2006	2019
Conventional (Clear Cell) Renal Cell Carcinoma	C0279702	ZEB2	9839	O60315	zinc finger E-box binding homeobox 2	Transcription factor	292	0.471	0.808	1	0.06		1	6	0	2013	2019
Conventional (Clear Cell) Renal Cell Carcinoma	C0279702	CDH1	999	P12830	cadherin 1		508	0.401	0.808	0.14631	0.06		1	6	0	2001	2019
Conventional (Clear Cell) Renal Cell Carcinoma	C0279702	TMED7-TICAM2	100302736	Q86XR7;Q9Y3B3	TMED7-TICAM2 readthrough		329	0.438	0.769	0.0025936	0.05		1	5	0	2002	2019
Conventional (Clear Cell) Renal Cell Carcinoma	C0279702	CDKN1B	1027	P46527	cyclin dependent kinase inhibitor 1B		454	0.409	0.769	0.62376	0.05		1	5	0	2002	2012
Conventional (Clear Cell) Renal Cell Carcinoma	C0279702	CIB1	10519	Q99828	calcium and integrin binding 1		275	0.458	0.769	0.00032612	0.05		1	5	0	2002	2012
Conventional (Clear Cell) Renal Cell Carcinoma	C0279702	LILRB1	10859	Q8NHL6	leukocyte immunoglobulin like receptor B1	Receptor	168	0.51	0.769	5.6502e-14	0.05		1	5	0	2013	2019
Conventional (Clear Cell) Renal Cell Carcinoma	C0279702	PLIN2	123	Q99541	perilipin 2	Transporter	100	0.564	0.692	7.5281e-09	0.05		1	5	0	2005	2019
Conventional (Clear Cell) Renal Cell Carcinoma	C0279702	DAB2IP	153090	Q5VWQ8	DAB2 interacting protein	Enzyme modulator	82	0.588	0.538	0.99995	0.05		1	5	0	2015	2019
Conventional (Clear Cell) Renal Cell Carcinoma	C0279702	EIF4E	1977	P06730	eukaryotic translation initiation factor 4E	Nucleic acid binding	317	0.448	0.846	0.94133	0.05		1	5	0	2017	2019
Conventional (Clear Cell) Renal Cell Carcinoma	C0279702	EPHB2	2048	P29323	EPH receptor B2	Kinase	649	0.374	0.846	0.99997	0.05		1	5	0	2008	2019
Conventional (Clear Cell) Renal Cell Carcinoma	C0279702	FOXO1	2308	Q12778	forkhead box O1		380	0.433	0.846	0.99725	0.05		1	5	0	2010	2019
Conventional (Clear Cell) Renal Cell Carcinoma	C0279702	BRD4	23476	O60885	bromodomain containing 4	Epigenetic regulator	335	0.446	0.885	1	0.05		1	5	0	2017	2018
Conventional (Clear Cell) Renal Cell Carcinoma	C0279702	GABPA	2551	Q06546	GA binding protein transcription factor subunit alpha	Transcription factor	632	0.379	0.885	0.99812	0.05		1	5	0	2017	2019
Conventional (Clear Cell) Renal Cell Carcinoma	C0279702	HMGB1	3146	P09429	high mobility group box 1	Nucleic acid binding	724	0.368	0.923	0.82035	0.05		1	5	0	2012	2019
Conventional (Clear Cell) Renal Cell Carcinoma	C0279702	HSPA5	3309	P11021	heat shock protein family A (Hsp70) member 5		350	0.434	0.885	0.77341	0.05		1	5	0	2014	2019
Conventional (Clear Cell) Renal Cell Carcinoma	C0279702	IGFBP3	3486	P17936	insulin like growth factor binding protein 3	Enzyme modulator	350	0.439	0.808	0.91029	0.05		0.8	5	1	2005	2017
Conventional (Clear Cell) Renal Cell Carcinoma	C0279702	TICAM2	353376	Q86XR7;Q9Y3B3	toll like receptor adaptor molecule 2		332	0.438	0.769	0.0025936	0.05		1	5	0	2002	2019
Conventional (Clear Cell) Renal Cell Carcinoma	C0279702	FAS	355	P25445	Fas cell surface death receptor		754	0.372	0.923	0.8117	0.05		1	5	0	2000	2019
Conventional (Clear Cell) Renal Cell Carcinoma	C0279702	CXCR2	3579	P25025	C-X-C motif chemokine receptor 2	G-protein coupled receptor	335	0.445	0.923	0.013736	0.05		1	5	0	2005	2018
Conventional (Clear Cell) Renal Cell Carcinoma	C0279702	IL18	3606	Q14116	interleukin 18		750	0.365	0.923	0.030717	0.05		1	5	2	2004	2019
Conventional (Clear Cell) Renal Cell Carcinoma	C0279702	ITPR2	3709	Q14571	inositol 1,4,5-trisphosphate receptor type 2	Ion channel	55	0.631	0.654	5.7127e-29	0.05		1	5	2	2012	2017
Conventional (Clear Cell) Renal Cell Carcinoma	C0279702	LDHA	3939	P00338	lactate dehydrogenase A	Enzyme	185	0.507	0.808	0.069173	0.05		1	5	0	2014	2018
Conventional (Clear Cell) Renal Cell Carcinoma	C0279702	LEP	3952	P41159	leptin		931	0.349	0.846	0.46491	0.05		0.6	5	0	2010	2019
Conventional (Clear Cell) Renal Cell Carcinoma	C0279702	LOXL2	4017	Q9Y4K0	lysyl oxidase like 2		149	0.527	0.731	3.3844e-07	0.05		1	5	0	2014	2019
Conventional (Clear Cell) Renal Cell Carcinoma	C0279702	MIR183	406959		microRNA 183		190	0.494	0.885		0.05		1	5	0	2015	2019
Conventional (Clear Cell) Renal Cell Carcinoma	C0279702	MIR200A	406983		microRNA 200a		156	0.519	0.808		0.05		1	5	0	2013	2018
Conventional (Clear Cell) Renal Cell Carcinoma	C0279702	MIR224	407009		microRNA 224		128	0.534	0.654		0.05		1	5	0	2011	2020
Conventional (Clear Cell) Renal Cell Carcinoma	C0279702	MIR30C2	407032		microRNA 30c-2		115	0.546	0.769		0.05		1	5	0	2013	2019
Conventional (Clear Cell) Renal Cell Carcinoma	C0279702	SMAD2	4087	Q15796	SMAD family member 2	Transcription factor	289	0.456	0.808	0.99661	0.05		1	5	0	2006	2020
Conventional (Clear Cell) Renal Cell Carcinoma	C0279702	MLH1	4292	P40692	mutL homolog 1	Nucleic acid binding	526	0.399	0.808	3.41e-05	0.05		1	5	0	2003	2020
Conventional (Clear Cell) Renal Cell Carcinoma	C0279702	MST1	4485	P26927	macrophage stimulating 1	Enzyme	281	0.465	0.885	4.7831e-19	0.05		1	5	0	1989	2005
Conventional (Clear Cell) Renal Cell Carcinoma	C0279702	MTHFR	4524	P42898	methylenetetrahydrofolate reductase		985	0.337	0.885	3.2068e-10	0.05		0.8	5	4	2008	2019
Conventional (Clear Cell) Renal Cell Carcinoma	C0279702	MUC1	4582	P15941	mucin 1, cell surface associated		594	0.384	0.885	0.018774	0.05		0.8	5	0	2000	2014
Conventional (Clear Cell) Renal Cell Carcinoma	C0279702	YBX1	4904	P67809	Y-box binding protein 1		148	0.519	0.769	0.94646	0.05		1	5	0	2015	2019
Conventional (Clear Cell) Renal Cell Carcinoma	C0279702	MIR378A	494327		microRNA 378a		127	0.532	0.808		0.05		1	5	0	2012	2019
Conventional (Clear Cell) Renal Cell Carcinoma	C0279702	SERPINE1	5054	P05121	serpin family E member 1	Enzyme modulator	770	0.359	0.885	0.043609	0.05		1	5	0	1996	2018
Conventional (Clear Cell) Renal Cell Carcinoma	C0279702	FOXP3	50943	Q9BZS1	forkhead box P3		688	0.368	0.846	0.99424	0.05		1	5	0	2017	2020
Conventional (Clear Cell) Renal Cell Carcinoma	C0279702	BHD	50947		Beukes familial hip dysplasia		31	0.678	0.385		0.05		0.8	5	0	2003	2018
Conventional (Clear Cell) Renal Cell Carcinoma	C0279702	TMED7	51014	Q86XR7;Q9Y3B3	transmembrane p24 trafficking protein 7	Transporter	336	0.436	0.808	0.47966	0.05		1	5	0	2002	2019
Conventional (Clear Cell) Renal Cell Carcinoma	C0279702	PDGFRB	5159	P09619	platelet derived growth factor receptor beta	Kinase	492	0.416	0.846	0.9041	0.05		1	5	0	2010	2019
Conventional (Clear Cell) Renal Cell Carcinoma	C0279702	TUG1	55000		taurine up-regulated 1		134	0.522	0.769		0.05		1	5	0	2016	2019
Conventional (Clear Cell) Renal Cell Carcinoma	C0279702	PRKCA	5578	P17252	protein kinase C alpha	Kinase	368	0.44	0.846	0.3677	0.05		1	5	0	2011	2017
Conventional (Clear Cell) Renal Cell Carcinoma	C0279702	ACKR3	57007	P25106	atypical chemokine receptor 3	G-protein coupled receptor	400	0.428	0.885	0.39134	0.05		1	5	0	2010	2017
Conventional (Clear Cell) Renal Cell Carcinoma	C0279702	SDHA	6389	P31040	succinate dehydrogenase complex flavoprotein subunit A	Enzyme	246	0.517	0.731	2.6088e-10	0.05		1	5	1	2007	2019
Conventional (Clear Cell) Renal Cell Carcinoma	C0279702	SDHD	6392	O14521	succinate dehydrogenase complex subunit D	Transporter	348	0.472	0.885	0.33697	0.05		0.8	5	0	2008	2017
Conventional (Clear Cell) Renal Cell Carcinoma	C0279702	SOX2	6657	P48431	SRY-box transcription factor 2	Transcription factor	503	0.405	0.808	0.70662	0.05		1	5	0	2011	2019
Conventional (Clear Cell) Renal Cell Carcinoma	C0279702	SOX4	6659	Q06945	SRY-box transcription factor 4	Transcription factor	246	0.489	0.808	0.92656	0.05		1	5	0	2015	2018
Conventional (Clear Cell) Renal Cell Carcinoma	C0279702	BSG	682	P35613	basigin (Ok blood group)		287	0.458	0.769	2.5873e-05	0.05		1	5	0	2009	2017
Conventional (Clear Cell) Renal Cell Carcinoma	C0279702	TWIST1	7291	Q15672	twist family bHLH transcription factor 1	Transcription factor	559	0.397	0.846	0.34491	0.05		1	5	0	2017	2019
Conventional (Clear Cell) Renal Cell Carcinoma	C0279702	HMGA2	8091	P52926	high mobility group AT-hook 2	Nucleic acid binding	382	0.429	0.808	0.87015	0.05		0.8	5	0	2017	2018
Conventional (Clear Cell) Renal Cell Carcinoma	C0279702	TCHP	84260	Q9BT92	trichoplein keratin filament binding		90	0.57	0.692	1.8026e-16	0.05		1	5	0	2004	2019
Conventional (Clear Cell) Renal Cell Carcinoma	C0279702	CDH6	1004	P55285	cadherin 6		32	0.691	0.385	0.91966	0.04		1	4	0	2002	2005
Conventional (Clear Cell) Renal Cell Carcinoma	C0279702	MICA	100507436	Q29983	MHC class I polypeptide-related sequence A		248	0.473	0.846	0.0049697	0.04		1	4	0	1992	2014
Conventional (Clear Cell) Renal Cell Carcinoma	C0279702	CDK4	1019	P11802	cyclin dependent kinase 4	Kinase	433	0.412	0.808	0.062909	0.04		1	4	0	2011	2019
Conventional (Clear Cell) Renal Cell Carcinoma	C0279702	ZNRD2	10534	O60232	zinc ribbon domain containing 2		311	0.443	0.769	1.8426e-07	0.04		1	4	0	2002	2019
Conventional (Clear Cell) Renal Cell Carcinoma	C0279702	SPINT2	10653	O43291	serine peptidase inhibitor, Kunitz type 2		112	0.556	0.808	0.00075147	0.04		1	4	1	2004	2018
Conventional (Clear Cell) Renal Cell Carcinoma	C0279702	KHDRBS1	10657	Q07666	KH RNA binding domain containing, signal transduction associated 1	Nucleic acid binding	289	0.457	0.846	0.99423	0.04		1	4	0	2009	2019
Conventional (Clear Cell) Renal Cell Carcinoma	C0279702	DCTN6	10671	O00399	dynactin subunit 6	Cellular structure	315	0.442	0.769	0.055741	0.04		1	4	0	2002	2019
Conventional (Clear Cell) Renal Cell Carcinoma	C0279702	SDS	10993	P20132	serine dehydratase	Enzyme	139	0.534	0.769	0.00013923	0.04		1	4	0	2012	2019
Conventional (Clear Cell) Renal Cell Carcinoma	C0279702	H3P23	115482696		H3 histone pseudogene 23		310	0.443	0.769		0.04		1	4	0	2002	2019
Conventional (Clear Cell) Renal Cell Carcinoma	C0279702	KLF6	1316	Q99612	Kruppel like factor 6	Nucleic acid binding	204	0.501	0.846	0.97946	0.04		1	4	0	2017	2019
Conventional (Clear Cell) Renal Cell Carcinoma	C0279702	CYP1A1	1543	P04798	cytochrome P450 family 1 subfamily A member 1	Enzyme	379	0.436	0.846	1.0635e-17	0.04		1	4	1	1999	2015
Conventional (Clear Cell) Renal Cell Carcinoma	C0279702	CYP1B1	1545	Q16678	cytochrome P450 family 1 subfamily B member 1	Enzyme	304	0.457	0.769	2.2024e-05	0.04		1	4	0	2013	2015
Conventional (Clear Cell) Renal Cell Carcinoma	C0279702	ACE	1636	P12821	angiotensin I converting enzyme	Enzyme	1082	0.328	0.923	1.0344e-37	0.04		1	4	0	2011	2017
Conventional (Clear Cell) Renal Cell Carcinoma	C0279702	DEFB1	1672	P60022	defensin beta 1		177	0.509	0.808	0.4059	0.04		0.75	4	0	2003	2006
Conventional (Clear Cell) Renal Cell Carcinoma	C0279702	EDN1	1906	P05305	endothelin 1	Signaling	679	0.38	0.846	0.45504	0.04		1	4	0	2004	2019
Conventional (Clear Cell) Renal Cell Carcinoma	C0279702	EDNRB	1910	P24530	endothelin receptor type B	G-protein coupled receptor	300	0.47	0.846	0.0092419	0.04		1	4	0	2007	2016
Conventional (Clear Cell) Renal Cell Carcinoma	C0279702	EN2	2020	P19622	engrailed homeobox 2	Transcription factor	41	0.674	0.462	0.63448	0.04		1	4	0	2014	2017
Conventional (Clear Cell) Renal Cell Carcinoma	C0279702	EPOR	2057	P19235	erythropoietin receptor	Receptor	162	0.526	0.692	0.0101	0.04		1	4	0	2005	2016
Conventional (Clear Cell) Renal Cell Carcinoma	C0279702	FABP7	2173	O15540	fatty acid binding protein 7		82	0.584	0.577	0.00078595	0.04		1	4	0	2007	2018
Conventional (Clear Cell) Renal Cell Carcinoma	C0279702	HEPACAM	220296	Q14CZ8	hepatic and glial cell adhesion molecule		70	0.621	0.5	0.86791	0.04		1	4	0	2010	2019
Conventional (Clear Cell) Renal Cell Carcinoma	C0279702	DKK1	22943	O94907	dickkopf WNT signaling pathway inhibitor 1		372	0.439	0.885	0.17423	0.04		1	4	0	2011	2019
Conventional (Clear Cell) Renal Cell Carcinoma	C0279702	KDM6B	23135	O15054	lysine demethylase 6B	Epigenetic regulator	173	0.514	0.808	1	0.04		1	4	0	2012	2017
Conventional (Clear Cell) Renal Cell Carcinoma	C0279702	XRCC6	2547	P12956	X-ray repair cross complementing 6	Enzyme	119	0.552	0.769	0.99904	0.04		1	4	4	2012	2015
Conventional (Clear Cell) Renal Cell Carcinoma	C0279702	GATA3	2625	P23771	GATA binding protein 3		429	0.415	0.846	0.89887	0.04		1	4	0	2010	2020
Conventional (Clear Cell) Renal Cell Carcinoma	C0279702	MYOF	26509	Q9NZM1	myoferlin	Transporter	34	0.691	0.538	1.475e-54	0.04		1	4	0	2017	2019
Conventional (Clear Cell) Renal Cell Carcinoma	C0279702	GNAS	2778	O95467;P63092;P84996;Q5JWF2	GNAS complex locus	Enzyme modulator	536	0.42	0.885	0.68076	0.04		1	4	1	2006	2017
Conventional (Clear Cell) Renal Cell Carcinoma	C0279702	NEAT1	283131		nuclear paraspeckle assembly transcript 1		179	0.502	0.769		0.04		1	4	0	2017	2019
Conventional (Clear Cell) Renal Cell Carcinoma	C0279702	HILPDA	29923	Q9Y5L2	hypoxia inducible lipid droplet associated		39	0.656	0.538	0.31634	0.04		1	4	0	2005	2017
Conventional (Clear Cell) Renal Cell Carcinoma	C0279702	HDAC1	3065	Q13547	histone deacetylase 1	Epigenetic regulator	277	0.46	0.846	0.61427	0.04		1	4	0	2018	2019
Conventional (Clear Cell) Renal Cell Carcinoma	C0279702	HLA-C	3107	P10321	major histocompatibility complex, class I, C		435	0.415	0.846	1.5695e-06	0.04		0.75	4	0	1993	2008
Conventional (Clear Cell) Renal Cell Carcinoma	C0279702	APEH	327	P13798	acylaminoacyl-peptide hydrolase	Enzyme	36	0.666	0.577	5.0018e-13	0.04		1	4	0	1989	1991
Conventional (Clear Cell) Renal Cell Carcinoma	C0279702	XIAP	331	P98170	X-linked inhibitor of apoptosis	Enzyme modulator	321	0.447	0.808	0.91837	0.04		1	4	0	2013	2018
Conventional (Clear Cell) Renal Cell Carcinoma	C0279702	IFI27	3429	P40305	interferon alpha inducible protein 27		332	0.437	0.769	0.010698	0.04		1	4	0	2002	2019
Conventional (Clear Cell) Renal Cell Carcinoma	C0279702	IFNB1	3456	P01574	interferon beta 1		426	0.421	0.846		0.04		1	4	0	2003	2012
Conventional (Clear Cell) Renal Cell Carcinoma	C0279702	ITGA5	3678	P08648	integrin subunit alpha 5		145	0.524	0.769	0.42455	0.04		1	4	0	2014	2017
Conventional (Clear Cell) Renal Cell Carcinoma	C0279702	KISS1	3814	Q15726	KiSS-1 metastasis suppressor		179	0.507	0.808	0.49039	0.04		1	4	0	2008	2018
Conventional (Clear Cell) Renal Cell Carcinoma	C0279702	KRT19	3880	P08727	keratin 19		270	0.46	0.731	0.0043426	0.04		0.75	4	0	2008	2018
Conventional (Clear Cell) Renal Cell Carcinoma	C0279702	LEPR	3953	P48357	leptin receptor	Signaling	416	0.433	0.808	0.99475	0.04		1	4	2	2014	2019
Conventional (Clear Cell) Renal Cell Carcinoma	C0279702	LGALS3	3958	P17931	galectin 3	Signaling	557	0.392	0.846	2.3207e-05	0.04		1	4	0	2016	2018
Conventional (Clear Cell) Renal Cell Carcinoma	C0279702	MIR144	406936		microRNA 144		175	0.5	0.769		0.04		1	4	0	2016	2018
Conventional (Clear Cell) Renal Cell Carcinoma	C0279702	MIR15A	406948		microRNA 15a		221	0.482	0.808		0.04		1	4	0	2017	2019
Conventional (Clear Cell) Renal Cell Carcinoma	C0279702	MIR182	406958		microRNA 182		211	0.486	0.846		0.04		1	4	0	2014	2018
Conventional (Clear Cell) Renal Cell Carcinoma	C0279702	MIR195	406971		microRNA 195		180	0.496	0.769		0.04		1	4	0	2016	2017
Conventional (Clear Cell) Renal Cell Carcinoma	C0279702	MIR203A	406986		microRNA 203a		237	0.471	0.808		0.04		1	4	0	2014	2019
Conventional (Clear Cell) Renal Cell Carcinoma	C0279702	MIR22	407004		microRNA 22		195	0.496	0.808		0.04		1	4	0	2015	2019
Conventional (Clear Cell) Renal Cell Carcinoma	C0279702	MIR222	407007		microRNA 222		210	0.486	0.808		0.04		1	4	0	2014	2019
Conventional (Clear Cell) Renal Cell Carcinoma	C0279702	MIR27A	407018		microRNA 27a		248	0.466	0.846		0.04		1	4	0	2007	2019
Conventional (Clear Cell) Renal Cell Carcinoma	C0279702	MIR29A	407021		microRNA 29a		278	0.459	0.808		0.04		1	4	0	2015	2018
Conventional (Clear Cell) Renal Cell Carcinoma	C0279702	MIR30C1	407031		microRNA 30c-1		109	0.552	0.769		0.04		1	4	0	2013	2019
Conventional (Clear Cell) Renal Cell Carcinoma	C0279702	MCAM	4162	P43121	melanoma cell adhesion molecule	Cell adhesion	169	0.514	0.731	0.00015954	0.04		1	4	1	2012	2018
Conventional (Clear Cell) Renal Cell Carcinoma	C0279702	MMP3	4314	P08254	matrix metallopeptidase 3	Enzyme	473	0.408	0.885	5.7362e-15	0.04		1	4	0	2004	2019
Conventional (Clear Cell) Renal Cell Carcinoma	C0279702	MIR338	442906		microRNA 338		128	0.535	0.808		0.04		1	4	0	2017	2018
Conventional (Clear Cell) Renal Cell Carcinoma	C0279702	MSH2	4436	P43246	mutS homolog 2	Nucleic acid binding	490	0.406	0.808	0.89539	0.04		0.75	4	0	2000	2012
Conventional (Clear Cell) Renal Cell Carcinoma	C0279702	MT1G	4495	P13640	metallothionein 1G		64	0.604	0.731	0.032173	0.04		1	4	0	2000	2019
Conventional (Clear Cell) Renal Cell Carcinoma	C0279702	NEDD9	4739	Q14511	neural precursor cell expressed, developmentally down-regulated 9		113	0.548	0.769	0.12634	0.04		1	4	0	1996	2017
Conventional (Clear Cell) Renal Cell Carcinoma	C0279702	NNMT	4837	P40261	nicotinamide N-methyltransferase	Enzyme	103	0.559	0.654	5.2791e-08	0.04		1	4	0	2011	2019
Conventional (Clear Cell) Renal Cell Carcinoma	C0279702	ANGPTL4	51129	Q9BY76	angiopoietin like 4	Signaling	198	0.498	0.731	2.3089e-11	0.04		1	4	0	2003	2017
Conventional (Clear Cell) Renal Cell Carcinoma	C0279702	PPARA	5465	Q07869	peroxisome proliferator activated receptor alpha	Nuclear receptor	408	0.432	0.885	0.030182	0.04		1	4	0	2013	2019
Conventional (Clear Cell) Renal Cell Carcinoma	C0279702	PRKAA1	5562	Q13131	protein kinase AMP-activated catalytic subunit alpha 1	Kinase	325	0.453	0.846	0.13725	0.04		1	4	0	2010	2019
Conventional (Clear Cell) Renal Cell Carcinoma	C0279702	PRKAB1	5564	Q9Y478	protein kinase AMP-activated non-catalytic subunit beta 1	Kinase	296	0.46	0.846	0.0052573	0.04		1	4	0	2010	2019
Conventional (Clear Cell) Renal Cell Carcinoma	C0279702	MAP2K1	5604	Q02750	mitogen-activated protein kinase kinase 1	Kinase	389	0.439	0.846	0.89669	0.04		0.75	4	0	2006	2017
Conventional (Clear Cell) Renal Cell Carcinoma	C0279702	B2M	567	P61769	beta-2-microglobulin	Immune response	352	0.447	0.846	0.56167	0.04		1	4	0	1992	2006
Conventional (Clear Cell) Renal Cell Carcinoma	C0279702	SLC12A9	56996	Q9BXP2	solute carrier family 12 member 9	Transporter	280	0.454	0.769	1.1806e-15	0.04		1	4	0	2009	2016
Conventional (Clear Cell) Renal Cell Carcinoma	C0279702	RAB25	57111	P57735	RAB25, member RAS oncogene family		53	0.628	0.385	1.1227e-07	0.04		1	4	0	2015	2019
Conventional (Clear Cell) Renal Cell Carcinoma	C0279702	PSMD9	5715	O00233	proteasome 26S subunit, non-ATPase 9	Enzyme modulator	344	0.435	0.846	4.8603e-06	0.04		1	4	0	2002	2019
Conventional (Clear Cell) Renal Cell Carcinoma	C0279702	MIR497	574456		microRNA 497		116	0.539	0.808		0.04		1	4	0	2015	2019
Conventional (Clear Cell) Renal Cell Carcinoma	C0279702	GAS5	60674		growth arrest specific 5		184	0.497	0.808		0.04		1	4	0	2013	2019
Conventional (Clear Cell) Renal Cell Carcinoma	C0279702	S100A9	6280	P06702	S100 calcium binding protein A9	Calcium-binding protein	363	0.433	0.885	0.4777	0.04		1	4	0	1991	2019
Conventional (Clear Cell) Renal Cell Carcinoma	C0279702	SDHC	6391	Q99643	succinate dehydrogenase complex subunit C		202	0.517	0.846	0.00020065	0.04		0.75	4	0	2008	2015
Conventional (Clear Cell) Renal Cell Carcinoma	C0279702	SMARCB1	6598	Q12824	SWI/SNF related, matrix associated, actin dependent regulator of chromatin, subfamily b, member 1	Nucleic acid binding	448	0.434	0.846	0.9971	0.04		1	4	0	2014	2018
Conventional (Clear Cell) Renal Cell Carcinoma	C0279702	SORD	6652	Q00796	sorbitol dehydrogenase	Enzyme	113	0.552	0.769	4.4938e-08	0.04		1	4	0	2012	2019
Conventional (Clear Cell) Renal Cell Carcinoma	C0279702	BRCA1	672	P38398	BRCA1 DNA repair associated	Enzyme	747	0.367	0.923	9.2157e-29	0.04		1	4	0	2011	2017
Conventional (Clear Cell) Renal Cell Carcinoma	C0279702	AURKA	6790	O14965	aurora kinase A	Kinase	245	0.475	0.731	0.8676	0.04		1	4	1	2007	2018
Conventional (Clear Cell) Renal Cell Carcinoma	C0279702	TAP1	6890	Q03518	transporter 1, ATP binding cassette subfamily B member	Transporter	181	0.5	0.808	5.3431e-06	0.04		0.75	4	0	1997	2003
Conventional (Clear Cell) Renal Cell Carcinoma	C0279702	TGFBR1	7046	P36897	transforming growth factor beta receptor 1	Kinase	347	0.451	0.885	0.85379	0.04		1	4	0	2016	2019
Conventional (Clear Cell) Renal Cell Carcinoma	C0279702	THRB	7068	P10828	thyroid hormone receptor beta	Nuclear receptor	142	0.554	0.769	0.99676	0.04		1	4	0	1991	2020
Conventional (Clear Cell) Renal Cell Carcinoma	C0279702	TIMP3	7078	P35625	TIMP metallopeptidase inhibitor 3	Enzyme modulator	325	0.445	0.923	0.63037	0.04		1	4	0	2009	2017
Conventional (Clear Cell) Renal Cell Carcinoma	C0279702	EZR	7430	P15311	ezrin	Cellular structure	255	0.476	0.808	0.17989	0.04		0.5	4	0	2010	2020
Conventional (Clear Cell) Renal Cell Carcinoma	C0279702	WT1	7490	P19544	WT1 transcription factor	Nucleic acid binding	446	0.422	0.808	0.99648	0.04		0.75	4	0	1998	2014
Conventional (Clear Cell) Renal Cell Carcinoma	C0279702	CA12	771	O43570	carbonic anhydrase 12		81	0.592	0.731	1.2849e-11	0.04		1	4	0	1998	2018
Conventional (Clear Cell) Renal Cell Carcinoma	C0279702	ASPSCR1	79058	Q9BZE9	ASPSCR1 tether for SLC2A4, UBX domain containing		54	0.653	0.538	4.4156e-12	0.04		1	4	0	2004	2019
Conventional (Clear Cell) Renal Cell Carcinoma	C0279702	ZC3H12A	80149	Q5D1E8	zinc finger CCCH-type containing 12A	Nucleic acid binding	88	0.578	0.654	0.14015	0.04		1	4	0	2017	2019
Conventional (Clear Cell) Renal Cell Carcinoma	C0279702	MAP1LC3B	81631	Q9GZQ8	microtubule associated protein 1 light chain 3 beta	Cellular structure	167	0.506	0.846	0.0019065	0.04		1	4	0	2012	2019
Conventional (Clear Cell) Renal Cell Carcinoma	C0279702	RUNX3	864	Q13761	RUNX family transcription factor 3	Transcription factor	281	0.459	0.731	0.84295	0.04		1	4	0	2013	2019
Conventional (Clear Cell) Renal Cell Carcinoma	C0279702	SQSTM1	8878	Q13501	sequestosome 1		470	0.428	0.885	0.00086035	0.04		1	4	0	2013	2019
Conventional (Clear Cell) Renal Cell Carcinoma	C0279702	MBD2	8932	Q9UBB5	methyl-CpG binding domain protein 2	Epigenetic regulator	256	0.466	0.846	0.34957	0.04		1	4	0	2008	2019
Conventional (Clear Cell) Renal Cell Carcinoma	C0279702	SOCS3	9021	O14543	suppressor of cytokine signaling 3	Enzyme modulator	375	0.434	0.808	0.74613	0.04		1	4	0	2011	2018
Conventional (Clear Cell) Renal Cell Carcinoma	C0279702	CD34	947	P28906	CD34 molecule		674	0.368	0.808	4.9881e-06	0.04		1	4	0	2004	2019
Conventional (Clear Cell) Renal Cell Carcinoma	C0279702	CDK1	983	P06493	cyclin dependent kinase 1	Kinase	214	0.482	0.808	0.99206	0.04		1	4	0	2016	2019
Conventional (Clear Cell) Renal Cell Carcinoma	C0279702	RBX1	9978	P62877	ring-box 1	Enzyme	63	0.601	0.615	0.94689	0.04		1	4	0	2001	2020
Conventional (Clear Cell) Renal Cell Carcinoma	C0279702	CD24	100133941	P25063	CD24 molecule		244	0.472	0.769		0.03		1	3	0	2016	2017
Conventional (Clear Cell) Renal Cell Carcinoma	C0279702	HOTTIP	100316868		HOXA distal transcript antisense RNA		90	0.575	0.654		0.03		1	3	0	2018	2019
Conventional (Clear Cell) Renal Cell Carcinoma	C0279702	LUCAT1	100505994		lung cancer associated transcript 1		60	0.612	0.577		0.03		1	3	0	2017	2019
Conventional (Clear Cell) Renal Cell Carcinoma	C0279702	CDK2	1017	P24941	cyclin dependent kinase 2	Kinase	270	0.456	0.692	0.61054	0.03		1	3	0	2014	2018
Conventional (Clear Cell) Renal Cell Carcinoma	C0279702	CDKN2B	1030	P42772	cyclin dependent kinase inhibitor 2B		440	0.417	0.769	0.0073369	0.03		1	3	0	1999	2019
Conventional (Clear Cell) Renal Cell Carcinoma	C0279702	ATG7	10533	O95352	autophagy related 7	Enzyme	179	0.505	0.769	7.3758e-12	0.03		1	3	2	2015	2019
Conventional (Clear Cell) Renal Cell Carcinoma	C0279702	POSTN	10631	Q15063	periostin	Signaling	378	0.428	0.885	1.0666e-09	0.03		0.667	3	0	2011	2017
Conventional (Clear Cell) Renal Cell Carcinoma	C0279702	SIX2	10736	Q9NPC8	SIX homeobox 2	Transcription factor	79	0.604	0.654	0.93869	0.03		1	3	0	2014	2019
Conventional (Clear Cell) Renal Cell Carcinoma	C0279702	RALBP1	10928	Q15311	ralA binding protein 1	Enzyme modulator	134	0.536	0.654	0.14667	0.03		1	3	0	2010	2018
Conventional (Clear Cell) Renal Cell Carcinoma	C0279702	ESM1	11082	Q9NQ30	endothelial cell specific molecule 1		81	0.595	0.654	0.21202	0.03		1	3	0	2007	2018
Conventional (Clear Cell) Renal Cell Carcinoma	C0279702	FSTL1	11167	Q12841	follistatin like 1	Enzyme modulator	128	0.541	0.808	0.89403	0.03		1	3	1	2016	2018
Conventional (Clear Cell) Renal Cell Carcinoma	C0279702	FAM107A	11170	O95990	family with sequence similarity 107 member A		36	0.674	0.462	8.2783e-07	0.03		1	3	0	1999	2008
Conventional (Clear Cell) Renal Cell Carcinoma	C0279702	EGLN3	112399	Q9H6Z9	egl-9 family hypoxia inducible factor 3		97	0.575	0.654	0.0094753	0.03		0.667	3	0	2011	2019
Conventional (Clear Cell) Renal Cell Carcinoma	C0279702	KLF8	11279	O95600	Kruppel like factor 8	Nucleic acid binding	55	0.628	0.462	0.0022471	0.03		1	3	0	2010	2014
Conventional (Clear Cell) Renal Cell Carcinoma	C0279702	UCN3	114131	Q969E3	urocortin 3		82	0.593	0.731	0.043878	0.03		1	3	0	2014	2020
Conventional (Clear Cell) Renal Cell Carcinoma	C0279702	CISH	1154	Q9NSE2	cytokine inducible SH2 containing protein	Enzyme modulator	195	0.5	0.808	0.00053852	0.03		1	3	0	2011	2018
Conventional (Clear Cell) Renal Cell Carcinoma	C0279702	ABCC2	1244	Q92887	ATP binding cassette subfamily C member 2	Transporter	254	0.483	0.808	5.2025e-47	0.03		1	3	0	1999	2013
Conventional (Clear Cell) Renal Cell Carcinoma	C0279702	COL11A2	1302	P13942	collagen type XI alpha 2 chain		399	0.435	0.846	0.70197	0.03		1	3	0	2004	2018
Conventional (Clear Cell) Renal Cell Carcinoma	C0279702	MAP3K8	1326	P41279	mitogen-activated protein kinase kinase kinase 8	Kinase	168	0.516	0.846	0.96825	0.03		1	3	0	2013	2016
Conventional (Clear Cell) Renal Cell Carcinoma	C0279702	ADM	133	P35318	adrenomedullin	Signaling	405	0.436	0.808	0.040831	0.03		1	3	0	2009	2016
Conventional (Clear Cell) Renal Cell Carcinoma	C0279702	CLDN7	1366	O95471	claudin 7	Cell-cell junction	192	0.494	0.808	0.0028828	0.03		1	3	0	2005	2019
Conventional (Clear Cell) Renal Cell Carcinoma	C0279702	GATA5	140628	Q9BWX5	GATA binding protein 5		101	0.578	0.615	0.28478	0.03		1	3	0	2012	2014
Conventional (Clear Cell) Renal Cell Carcinoma	C0279702	CMTM4	146223	Q8IZR5	CKLF like MARVEL transmembrane domain containing 4		10	0.805	0.154	0.23064	0.03		1	3	0	2015	2019
Conventional (Clear Cell) Renal Cell Carcinoma	C0279702	CTSK	1513	P43235	cathepsin K	Enzyme	221	0.497	0.808	3.0989e-05	0.03		1	3	0	2014	2017
Conventional (Clear Cell) Renal Cell Carcinoma	C0279702	ENG	2022	P17813	endoglin		371	0.446	0.846	0.99858	0.03		0.667	3	0	2015	2019
Conventional (Clear Cell) Renal Cell Carcinoma	C0279702	ERBB4	2066	Q15303	erb-b2 receptor tyrosine kinase 4	Kinase	317	0.455	0.846	0.99912	0.03		0.667	3	0	2004	2012
Conventional (Clear Cell) Renal Cell Carcinoma	C0279702	EWSR1	2130	Q01844	EWS RNA binding protein 1	Nucleic acid binding	251	0.474	0.692	0.99981	0.03		0.667	3	0	2012	2020
Conventional (Clear Cell) Renal Cell Carcinoma	C0279702	FABP5	2171	Q01469	fatty acid binding protein 5		85	0.585	0.731	0.047008	0.03		1	3	0	2019	2020
Conventional (Clear Cell) Renal Cell Carcinoma	C0279702	FGF2	2247	P09038	fibroblast growth factor 2	Signaling	635	0.383	0.923	0.0184	0.03		1	3	0	1994	2007
Conventional (Clear Cell) Renal Cell Carcinoma	C0279702	FGFR3	2261	P22607	fibroblast growth factor receptor 3	Kinase	654	0.391	0.846	1.6432e-05	0.03		1	3	0	2011	2018
Conventional (Clear Cell) Renal Cell Carcinoma	C0279702	FOXO3	2309	O43524	forkhead box O3		381	0.431	0.808	0.98806	0.03		1	3	0	2014	2019
Conventional (Clear Cell) Renal Cell Carcinoma	C0279702	SIRT1	23411	Q96EB6	sirtuin 1	Epigenetic regulator	675	0.378	0.885	0.087326	0.03		1	3	0	2016	2019
Conventional (Clear Cell) Renal Cell Carcinoma	C0279702	NUP62	23636	P37198	nucleoporin 62	Transporter	273	0.47	0.885	0.95006	0.03		1	3	0	2016	2019
Conventional (Clear Cell) Renal Cell Carcinoma	C0279702	ALPP	250	P05187	alkaline phosphatase, placental	Enzyme	209	0.487	0.808	1.8144e-13	0.03		1	3	0	1997	2014
Conventional (Clear Cell) Renal Cell Carcinoma	C0279702	CASC2	255082		cancer susceptibility 2		64	0.612	0.462		0.03		1	3	0	2016	2018
Conventional (Clear Cell) Renal Cell Carcinoma	C0279702	LAT	27040	O43561	linker for activation of T cells		124	0.548	0.731	0.0092377	0.03		1	3	0	2013	2019
Conventional (Clear Cell) Renal Cell Carcinoma	C0279702	BBC3	27113	Q96PG8;Q9BXH1	BCL2 binding component 3		157	0.517	0.769	0.0039762	0.03		1	3	0	2011	2017
Conventional (Clear Cell) Renal Cell Carcinoma	C0279702	ANGPT1	284	Q15389	angiopoietin 1	Signaling	340	0.446	0.808	0.95208	0.03		1	3	0	2007	2020
Conventional (Clear Cell) Renal Cell Carcinoma	C0279702	ANGPT2	285	O15123	angiopoietin 2	Signaling	457	0.41	0.846	0.83208	0.03		1	3	0	2007	2015
Conventional (Clear Cell) Renal Cell Carcinoma	C0279702	GPT	2875	P24298	glutamic--pyruvic transaminase	Enzyme	511	0.403	0.923	3.5945e-19	0.03		1	3	0	2011	2019
Conventional (Clear Cell) Renal Cell Carcinoma	C0279702	UHRF1	29128	Q96T88	ubiquitin like with PHD and ring finger domains 1		125	0.54	0.692		0.03		1	3	0	2015	2019
Conventional (Clear Cell) Renal Cell Carcinoma	C0279702	GSTM2	2946	P28161	glutathione S-transferase mu 2		195	0.488	0.808	3.3913e-07	0.03		1	3	0	2000	2014
Conventional (Clear Cell) Renal Cell Carcinoma	C0279702	GTF2H1	2965	P32780	general transcription factor IIH subunit 1	Transcription factor	258	0.469	0.846	0.98982	0.03		1	3	0	2016	2019
Conventional (Clear Cell) Renal Cell Carcinoma	C0279702	HLA-DRB1	3123	P01911	major histocompatibility complex, class II, DR beta 1	Immune response	1018	0.333	0.923	0.0010997	0.03		1	3	0	1997	2017
Conventional (Clear Cell) Renal Cell Carcinoma	C0279702	HMOX1	3162	P09601	heme oxygenase 1		666	0.381	0.923	0.0096817	0.03		1	3	0	2017	2019
Conventional (Clear Cell) Renal Cell Carcinoma	C0279702	ICAM1	3383	P05362	intercellular adhesion molecule 1		737	0.364	0.962	0.035295	0.03		0.667	3	0	1994	2015
Conventional (Clear Cell) Renal Cell Carcinoma	C0279702	KLK3	354	P07288	kallikrein related peptidase 3	Enzyme	358	0.443	0.885	4.4271e-06	0.03		1	3	0	1997	2017
Conventional (Clear Cell) Renal Cell Carcinoma	C0279702	CXCR1	3577	P25024	C-X-C motif chemokine receptor 1	G-protein coupled receptor	167	0.508	0.769	3.0337e-07	0.03		1	3	0	2014	2019
Conventional (Clear Cell) Renal Cell Carcinoma	C0279702	ILK	3611	Q13418	integrin linked kinase	Kinase	192	0.503	0.769	3.7887e-05	0.03		1	3	0	2007	2019
Conventional (Clear Cell) Renal Cell Carcinoma	C0279702	CXCL10	3627	P02778	C-X-C motif chemokine ligand 10	Signaling	631	0.378	0.885	0.36865	0.03		1	3	0	1999	2009
Conventional (Clear Cell) Renal Cell Carcinoma	C0279702	ITGB1	3688	P05556	integrin subunit beta 1	Receptor	210	0.496	0.808	0.98208	0.03		1	3	0	2014	2019
Conventional (Clear Cell) Renal Cell Carcinoma	C0279702	CD82	3732	P27701	CD82 molecule		172	0.507	0.731	1.2726e-08	0.03		1	3	0	2009	2017
Conventional (Clear Cell) Renal Cell Carcinoma	C0279702	LCN2	3934	P80188	lipocalin 2	Enzyme	497	0.405	0.885	1.1404e-09	0.03		1	3	0	1996	2020
Conventional (Clear Cell) Renal Cell Carcinoma	C0279702	LGALS1	3956	P09382	galectin 1	Signaling	362	0.435	0.846	0.004488	0.03		1	3	0	2014	2019
Conventional (Clear Cell) Renal Cell Carcinoma	C0279702	LINC01194	404663		long intergenic non-protein coding RNA 1194		249	0.47	0.769		0.03		1	3	0	2003	2019
Conventional (Clear Cell) Renal Cell Carcinoma	C0279702	MIR106A	406899		microRNA 106a		140	0.524	0.846		0.03		1	3	0	2015	2017
Conventional (Clear Cell) Renal Cell Carcinoma	C0279702	MIR125A	406910		microRNA 125a		225	0.48	0.769		0.03		1	3	0	2015	2019
Conventional (Clear Cell) Renal Cell Carcinoma	C0279702	MIR17	406952		microRNA 17		270	0.459	0.846		0.03		1	3	0	2010	2015
Conventional (Clear Cell) Renal Cell Carcinoma	C0279702	MIR181A2	406954		microRNA 181a-2		85	0.57	0.654		0.03		1	3	0	2017	2018
Conventional (Clear Cell) Renal Cell Carcinoma	C0279702	MIR185	406961		microRNA 185		106	0.551	0.808		0.03		1	3	0	2014	2015
Conventional (Clear Cell) Renal Cell Carcinoma	C0279702	MIR199B	406978		microRNA 199b		71	0.588	0.615		0.03		1	3	0	2018	2019
Conventional (Clear Cell) Renal Cell Carcinoma	C0279702	MIR19A	406979		microRNA 19a		151	0.512	0.808		0.03		1	3	0	2015	2018
Conventional (Clear Cell) Renal Cell Carcinoma	C0279702	MIR200B	406984		microRNA 200b		180	0.5	0.769		0.03		1	3	0	2018	2019
Conventional (Clear Cell) Renal Cell Carcinoma	C0279702	MIR223	407008		microRNA 223		348	0.433	0.808		0.03		1	3	0	2018	2019
Conventional (Clear Cell) Renal Cell Carcinoma	C0279702	MIR29B1	407024		microRNA 29b-1		212	0.485	0.846		0.03		1	3	0	2015	2018
Conventional (Clear Cell) Renal Cell Carcinoma	C0279702	MIR29B2	407025		microRNA 29b-2		214	0.484	0.885		0.03		1	3	0	2015	2018
Conventional (Clear Cell) Renal Cell Carcinoma	C0279702	MIR29C	407026		microRNA 29c		183	0.496	0.808		0.03		1	3	0	2018	2019
Conventional (Clear Cell) Renal Cell Carcinoma	C0279702	MIR99A	407055		microRNA 99a		122	0.536	0.808		0.03		1	3	0	2012	2019
Conventional (Clear Cell) Renal Cell Carcinoma	C0279702	MAGEA6	4105	P43360	MAGE family member A6	Cell adhesion	17	0.736	0.231		0.03		1	3	0	2002	2018
Conventional (Clear Cell) Renal Cell Carcinoma	C0279702	MFAP1	4236	P55081	microfibril associated protein 1	Extracellular structure	357	0.431	0.846	0.79602	0.03		1	3	0	2002	2018
Conventional (Clear Cell) Renal Cell Carcinoma	C0279702	MKI67	4288	P46013	marker of proliferation Ki-67		351	0.431	0.808	1.2598e-28	0.03		1	3	0	2002	2017
Conventional (Clear Cell) Renal Cell Carcinoma	C0279702	ABCC1	4363	P33527	ATP binding cassette subfamily C member 1	Transporter	333	0.445	0.808	0.0011727	0.03		1	3	0	1996	2018
Conventional (Clear Cell) Renal Cell Carcinoma	C0279702	ASS1	445	P00966	argininosuccinate synthase 1	Enzyme	163	0.523	0.731	1.5095e-09	0.03		1	3	0	2018	2019
Conventional (Clear Cell) Renal Cell Carcinoma	C0279702	MT1E	4493	P04732	metallothionein 1E		104	0.569	0.769	0.031344	0.03		1	3	0	2000	2019
Conventional (Clear Cell) Renal Cell Carcinoma	C0279702	NME1	4830	P15531	NME/NM23 nucleoside diphosphate kinase 1	Kinase	329	0.443	0.808	0.0031764	0.03		0.667	3	0	1997	2005
Conventional (Clear Cell) Renal Cell Carcinoma	C0279702	CCN3	4856	P48745	cellular communication network factor 3	Signaling	117	0.554	0.615	0.0066442	0.03		1	3	0	2008	2017
Conventional (Clear Cell) Renal Cell Carcinoma	C0279702	ROR2	4920	Q01974	receptor tyrosine kinase like orphan receptor 2	Kinase	250	0.498	0.731	0.00012401	0.03		1	3	0	2009	2014
Conventional (Clear Cell) Renal Cell Carcinoma	C0279702	NUCB2	4925	P80303	nucleobindin 2	Calcium-binding protein	140	0.54	0.731	2.0028e-10	0.03		1	3	0	2015	2018
Conventional (Clear Cell) Renal Cell Carcinoma	C0279702	MIR384	494333		microRNA 384		55	0.612	0.731		0.03		1	3	0	2018	2019
Conventional (Clear Cell) Renal Cell Carcinoma	C0279702	MIR425	494337		microRNA 425		78	0.581	0.654		0.03		1	3	0	2014	2018
Conventional (Clear Cell) Renal Cell Carcinoma	C0279702	DUXAP8	503637		double homeobox A pseudogene 8		24	0.7	0.269		0.03		1	3	0	2017	2019
Conventional (Clear Cell) Renal Cell Carcinoma	C0279702	PCDH8	5100	O95206	protocadherin 8		39	0.659	0.577	3.424e-05	0.03		1	3	0	2011	2017
Conventional (Clear Cell) Renal Cell Carcinoma	C0279702	ADIPOR1	51094	Q96A54	adiponectin receptor 1	Receptor	148	0.529	0.808	0.6584	0.03		0.667	3	0	2014	2019
Conventional (Clear Cell) Renal Cell Carcinoma	C0279702	DCTN4	51164	Q9UJW0	dynactin subunit 4		253	0.472	0.846	0.73221	0.03		1	3	0	2016	2019
Conventional (Clear Cell) Renal Cell Carcinoma	C0279702	GDE1	51573	Q9NZC3	glycerophosphodiester phosphodiesterase 1		228	0.481	0.808	6.1163e-06	0.03		1	3	0	2009	2019
Conventional (Clear Cell) Renal Cell Carcinoma	C0279702	MED15	51586	Q96RN5	mediator complex subunit 15		57	0.623	0.654	0.99974	0.03		1	3	0	2018	2019
Conventional (Clear Cell) Renal Cell Carcinoma	C0279702	PDK1	5163	Q15118	pyruvate dehydrogenase kinase 1	Kinase	164	0.51	0.808	1.0963e-05	0.03		1	3	0	2013	2019
Conventional (Clear Cell) Renal Cell Carcinoma	C0279702	PFN1	5216	P07737	profilin 1		119	0.565	0.769	0.73258	0.03		0.667	3	0	2011	2015
Conventional (Clear Cell) Renal Cell Carcinoma	C0279702	PGF	5228	P49763	placental growth factor	Signaling	288	0.46	0.846	0.1288	0.03		1	3	0	1999	2018
Conventional (Clear Cell) Renal Cell Carcinoma	C0279702	PLAU	5328	P00749	plasminogen activator, urokinase	Enzyme	439	0.425	0.923	2.3058e-06	0.03		1	3	0	1995	2006
Conventional (Clear Cell) Renal Cell Carcinoma	C0279702	PLK1	5347	P53350	polo like kinase 1	Kinase	253	0.467	0.808	0.97851	0.03		0.667	3	0	2011	2019
Conventional (Clear Cell) Renal Cell Carcinoma	C0279702	PMS2	5395	P54278	PMS1 homolog 2, mismatch repair system component	Nucleic acid binding	244	0.484	0.808	4.5176e-27	0.03		1	3	0	2003	2016
Conventional (Clear Cell) Renal Cell Carcinoma	C0279702	POU2F2	5452	P09086	POU class 2 homeobox 2		69	0.599	0.692	0.99884	0.03		1	3	0	2016	2019
Conventional (Clear Cell) Renal Cell Carcinoma	C0279702	EGLN1	54583	Q9GZT9	egl-9 family hypoxia inducible factor 1		130	0.54	0.731	0.97403	0.03		0.667	3	0	2010	2012
Conventional (Clear Cell) Renal Cell Carcinoma	C0279702	PPBP	5473	P02775	pro-platelet basic protein	Signaling	111	0.544	0.808	0.057739	0.03		1	3	0	2014	2017
Conventional (Clear Cell) Renal Cell Carcinoma	C0279702	TESC	54997	Q96BS2	tescalcin		97	0.57	0.692	0.10778	0.03		1	3	0	2018	2019
Conventional (Clear Cell) Renal Cell Carcinoma	C0279702	FBXW7	55294	Q969H0	F-box and WD repeat domain containing 7	Enzyme modulator	257	0.465	0.808	0.99949	0.03		1	3	0	2015	2018
Conventional (Clear Cell) Renal Cell Carcinoma	C0279702	MEG3	55384		maternally expressed 3		239	0.471	0.846		0.03		1	3	0	2006	2019
Conventional (Clear Cell) Renal Cell Carcinoma	C0279702	PRKAA2	5563	P54646	protein kinase AMP-activated catalytic subunit alpha 2	Kinase	317	0.456	0.846	3.5282e-08	0.03		1	3	0	2010	2019
Conventional (Clear Cell) Renal Cell Carcinoma	C0279702	BRK1	55845	Q8WUW1	BRICK1 subunit of SCAR/WAVE actin nucleating complex		14	0.743	0.308	0.68706	0.03		0.667	3	0	2004	2009
Conventional (Clear Cell) Renal Cell Carcinoma	C0279702	ACSS2	55902	Q9NR19	acyl-CoA synthetase short chain family member 2	Enzyme	188	0.506	0.808	1.1443e-13	0.03		1	3	0	1997	2018
Conventional (Clear Cell) Renal Cell Carcinoma	C0279702	CMAS	55907	Q8NFW8	cytidine monophosphate N-acetylneuraminic acid synthetase	Enzyme	49	0.644	0.769	0.56141	0.03		1	3	0	2013	2019
Conventional (Clear Cell) Renal Cell Carcinoma	C0279702	NDUFA4L2	56901	Q9NRX3	NDUFA4 mitochondrial complex associated like 2	Enzyme	19	0.736	0.346	0.086367	0.03		1	3	0	2016	2018
Conventional (Clear Cell) Renal Cell Carcinoma	C0279702	SMYD2	56950	Q9NRG4	SET and MYND domain containing 2	Epigenetic regulator	54	0.628	0.538	2.4631e-06	0.03		1	3	0	2015	2019
Conventional (Clear Cell) Renal Cell Carcinoma	C0279702	PTBP1	5725	P26599	polypyrimidine tract binding protein 1		172	0.517	0.769	0.99961	0.03		1	3	0	2010	2018
Conventional (Clear Cell) Renal Cell Carcinoma	C0279702	MIR508	574513		microRNA 508		26	0.705	0.385		0.03		1	3	0	2012	2019
Conventional (Clear Cell) Renal Cell Carcinoma	C0279702	PTK2	5747	Q05397	protein tyrosine kinase 2	Kinase	205	0.497	0.808	0.99987	0.03		1	3	0	2015	2019
Conventional (Clear Cell) Renal Cell Carcinoma	C0279702	MIB1	57534	Q86YT6	mindbomb E3 ubiquitin protein ligase 1	Enzyme	329	0.438	0.769	3.3574e-88	0.03		1	3	0	2002	2017
Conventional (Clear Cell) Renal Cell Carcinoma	C0279702	CIP2A	57650	Q8TCG1	cellular inhibitor of PP2A		141	0.524	0.808	1.3591e-13	0.03		0.667	3	0	2018	2019
Conventional (Clear Cell) Renal Cell Carcinoma	C0279702	MOK	5891	Q9UQ07	MOK protein kinase	Kinase	251	0.476	0.769	8.8397e-22	0.03		1	3	0	1996	2018
Conventional (Clear Cell) Renal Cell Carcinoma	C0279702	REN	5972	P00797	renin	Enzyme	721	0.37	0.923	2.4297e-07	0.03		1	3	0	1992	2019
Conventional (Clear Cell) Renal Cell Carcinoma	C0279702	S100A1	6271	P23297	S100 calcium binding protein A1	Calcium-binding protein	396	0.421	0.846	0.0060044	0.03		1	3	0	2002	2015
Conventional (Clear Cell) Renal Cell Carcinoma	C0279702	SATB1	6304	Q01826	SATB homeobox 1	Transcription factor	147	0.525	0.769	0.99051	0.03		1	3	0	2014	2017
Conventional (Clear Cell) Renal Cell Carcinoma	C0279702	SCD	6319	O00767	stearoyl-CoA desaturase		225	0.49	0.808	0.96968	0.03		0.667	3	0	2013	2016
Conventional (Clear Cell) Renal Cell Carcinoma	C0279702	GOLPH3	64083	Q9H4A6	golgi phosphoprotein 3		140	0.53	0.808	0.23586	0.03		1	3	0	2014	2019
Conventional (Clear Cell) Renal Cell Carcinoma	C0279702	SFPQ	6421	P23246	splicing factor proline and glutamine rich	Nucleic acid binding	75	0.593	0.654	0.99992	0.03		1	3	0	2011	2017
Conventional (Clear Cell) Renal Cell Carcinoma	C0279702	CDCP1	64866	Q9H5V8	CUB domain containing protein 1		81	0.604	0.654	0.0001002	0.03		1	3	0	2008	2013
Conventional (Clear Cell) Renal Cell Carcinoma	C0279702	WNK1	65125	Q9H4A3	WNK lysine deficient protein kinase 1	Kinase	460	0.416	0.846	1	0.03		1	3	0	2011	2019
Conventional (Clear Cell) Renal Cell Carcinoma	C0279702	UCA1	652995		urothelial cancer associated 1		152	0.512	0.808		0.03		1	3	0	2016	2018
Conventional (Clear Cell) Renal Cell Carcinoma	C0279702	BMP6	654	P22004	bone morphogenetic protein 6	Signaling	137	0.531	0.808	0.75947	0.03		1	3	0	2003	2013
Conventional (Clear Cell) Renal Cell Carcinoma	C0279702	SLC22A2	6582	O15244	solute carrier family 22 member 2	Transporter	98	0.572	0.769	2.0202e-12	0.03		1	3	0	2016	2019
Conventional (Clear Cell) Renal Cell Carcinoma	C0279702	SNAI2	6591	O43623	snail family transcriptional repressor 2		189	0.505	0.692	0.79531	0.03		1	3	0	2015	2019
Conventional (Clear Cell) Renal Cell Carcinoma	C0279702	SNAI1	6615	O95863	snail family transcriptional repressor 1		243	0.474	0.808	0.21754	0.03		1	3	0	2017	2019
Conventional (Clear Cell) Renal Cell Carcinoma	C0279702	BNIP3	664	Q12983	BCL2 interacting protein 3		158	0.52	0.731	1.9687e-05	0.03		1	3	0	2005	2019
Conventional (Clear Cell) Renal Cell Carcinoma	C0279702	BRAF	673	P15056	B-Raf proto-oncogene, serine/threonine kinase	Kinase	1228	0.319	0.846	0.99995	0.03		1	3	2	2015	2018
Conventional (Clear Cell) Renal Cell Carcinoma	C0279702	SST	6750	P61278	somatostatin	Signaling	535	0.399	0.885	0.34128	0.03		0.667	3	0	1999	2018
Conventional (Clear Cell) Renal Cell Carcinoma	C0279702	STK11	6794	Q15831	serine/threonine kinase 11	Kinase	372	0.435	0.808	0.9934	0.03		1	3	0	2013	2018
Conventional (Clear Cell) Renal Cell Carcinoma	C0279702	TCF4	6925	P15884	transcription factor 4	Transcription factor	378	0.464	0.846	0.99981	0.03		1	3	0	2003	2020
Conventional (Clear Cell) Renal Cell Carcinoma	C0279702	MIR590	693175		microRNA 590		99	0.553	0.692		0.03		1	3	0	2013	2019
Conventional (Clear Cell) Renal Cell Carcinoma	C0279702	TCF7L2	6934	Q9NQB0	transcription factor 7 like 2		257	0.485	0.846	0.99537	0.03		1	3	0	2003	2020
Conventional (Clear Cell) Renal Cell Carcinoma	C0279702	TCF21	6943	O43680	transcription factor 21		143	0.537	0.692	0.82553	0.03		1	3	0	2012	2018
Conventional (Clear Cell) Renal Cell Carcinoma	C0279702	TFAP2A	7020	P05549	transcription factor AP-2 alpha	Transcription factor	250	0.488	0.769	0.98964	0.03		1	3	0	2004	2020
Conventional (Clear Cell) Renal Cell Carcinoma	C0279702	TGFB2	7042	P61812	transforming growth factor beta 2	Signaling	389	0.433	0.885	0.99905	0.03		1	3	0	2015	2018
Conventional (Clear Cell) Renal Cell Carcinoma	C0279702	TGFBR2	7048	P37173	transforming growth factor beta receptor 2	Kinase	502	0.413	0.846	0.12535	0.03		1	3	0	2003	2015
Conventional (Clear Cell) Renal Cell Carcinoma	C0279702	TLR1	7096	Q15399	toll like receptor 1		198	0.496	0.808	5.8704e-23	0.03		1	3	0	1996	2000
Conventional (Clear Cell) Renal Cell Carcinoma	C0279702	TPM1	7168	P09493	tropomyosin 1	Cellular structure	117	0.56	0.615	0.0010165	0.03		1	3	0	2015	2019
Conventional (Clear Cell) Renal Cell Carcinoma	C0279702	TYMS	7298	P04818	thymidylate synthetase	Enzyme	406	0.425	0.846	0.72247	0.03		1	3	0	2008	2013
Conventional (Clear Cell) Renal Cell Carcinoma	C0279702	UCP1	7350	P25874	uncoupling protein 1	Transporter	124	0.545	0.769	1.6903e-11	0.03		1	3	0	2019	2019
Conventional (Clear Cell) Renal Cell Carcinoma	C0279702	VCAM1	7412	P19320	vascular cell adhesion molecule 1		406	0.422	0.808	0.79791	0.03		0.667	3	0	2006	2017
Conventional (Clear Cell) Renal Cell Carcinoma	C0279702	VCL	7414	P18206	vinculin		105	0.575	0.654	0.046788	0.03		1	3	0	2011	2019
Conventional (Clear Cell) Renal Cell Carcinoma	C0279702	VEGFC	7424	P49767	vascular endothelial growth factor C	Signaling	291	0.459	0.769	0.49565	0.03		1	3	0	2001	2019
Conventional (Clear Cell) Renal Cell Carcinoma	C0279702	VTCN1	79679	Q7Z7D3	V-set domain containing T cell activation inhibitor 1	Enzyme modulator	139	0.529	0.692	1.3669e-12	0.03		1	3	0	2013	2018
Conventional (Clear Cell) Renal Cell Carcinoma	C0279702	L2HGDH	79944	Q9H9P8	L-2-hydroxyglutarate dehydrogenase	Enzyme	62	0.653	0.462	4.2231e-05	0.03		1	3	0	2014	2019
Conventional (Clear Cell) Renal Cell Carcinoma	C0279702	JADE1	79960	Q6IE81	jade family PHD finger 1	Transcription factor	18	0.743	0.308	0.99885	0.03		1	3	0	2012	2014
Conventional (Clear Cell) Renal Cell Carcinoma	C0279702	TRPM3	80036	Q9HCF6	transient receptor potential cation channel subfamily M member 3	Ion channel	51	0.663	0.769	5.6853e-07	0.03		1	3	0	2014	2020
Conventional (Clear Cell) Renal Cell Carcinoma	C0279702	RBM10	8241	P98175	RNA binding motif protein 10		99	0.599	0.615	1	0.03		1	3	0	2016	2019
Conventional (Clear Cell) Renal Cell Carcinoma	C0279702	CAPNS1	826	P04632	calpain small subunit 1		37	0.674	0.538	7.11e-07	0.03		1	3	0	2014	2018
Conventional (Clear Cell) Renal Cell Carcinoma	C0279702	ARHGAP24	83478	Q8N264	Rho GTPase activating protein 24		273	0.456	0.808	3.9495e-10	0.03		1	3	0	1998	2016
Conventional (Clear Cell) Renal Cell Carcinoma	C0279702	CUL2	8453	Q13617	cullin 2	Enzyme	26	0.7	0.5	1	0.03		0.667	3	0	1999	2014
Conventional (Clear Cell) Renal Cell Carcinoma	C0279702	CASR	846	P41180	calcium sensing receptor	G-protein coupled receptor	517	0.41	0.846	0.046698	0.03		1	3	0	2007	2018
Conventional (Clear Cell) Renal Cell Carcinoma	C0279702	CAV2	858	P51636	caveolin 2	Enzyme modulator	96	0.575	0.692	0.026973	0.03		1	3	0	2013	2018
Conventional (Clear Cell) Renal Cell Carcinoma	C0279702	BECN1	8678	Q14457	beclin 1	Enzyme modulator	373	0.432	0.846	0.93717	0.03		1	3	0	2013	2019
Conventional (Clear Cell) Renal Cell Carcinoma	C0279702	TNFRSF10B	8795	O14763	TNF receptor superfamily member 10b		179	0.505	0.769	0.00019928	0.03		1	3	0	2000	2015
Conventional (Clear Cell) Renal Cell Carcinoma	C0279702	APLN	8862	Q9ULZ1	apelin		226	0.497	0.769	0.45897	0.03		1	3	0	2017	2019
Conventional (Clear Cell) Renal Cell Carcinoma	C0279702	SART1	9092	O43290	spliceosome associated factor 1, recruiter of U4/U6.U5 tri-snRNP	Extracellular structure	31	0.682	0.308	0.88163	0.03		1	3	0	2015	2017
Conventional (Clear Cell) Renal Cell Carcinoma	C0279702	LATS1	9113	O95835	large tumor suppressor kinase 1	Kinase	99	0.563	0.731	0.99987	0.03		1	3	0	2014	2018
Conventional (Clear Cell) Renal Cell Carcinoma	C0279702	CBFA2T2	9139	O43439	CBFA2/RUNX1 partner transcriptional co-repressor 2	Transcription factor	64	0.615	0.654	0.99585	0.03		1	3	0	2017	2018
Conventional (Clear Cell) Renal Cell Carcinoma	C0279702	MTDH	92140	Q86UE4	metadherin		200	0.491	0.769	0.32924	0.03		1	3	0	2010	2018
Conventional (Clear Cell) Renal Cell Carcinoma	C0279702	CD80	941	P33681	CD80 molecule		233	0.475	0.769	0.010898	0.03		1	3	0	1995	2000
Conventional (Clear Cell) Renal Cell Carcinoma	C0279702	CD68	968	P34810	CD68 molecule	Transporter	452	0.408	0.808	1.4063e-06	0.03		1	3	0	2018	2019
Conventional (Clear Cell) Renal Cell Carcinoma	C0279702	CD74	972	P04233	CD74 molecule	Enzyme modulator	170	0.512	0.808	0.24889	0.03		1	3	0	2008	2019
Conventional (Clear Cell) Renal Cell Carcinoma	C0279702	HDAC9	9734	Q9UKV0	histone deacetylase 9	Epigenetic regulator	340	0.439	0.846	0.99973	0.03		1	3	0	2012	2019
Conventional (Clear Cell) Renal Cell Carcinoma	C0279702	AKT3	10000	Q9Y243	AKT serine/threonine kinase 3	Kinase	183	0.512	0.808	0.99958	0.02		1	2	0	2013	2019
Conventional (Clear Cell) Renal Cell Carcinoma	C0279702	CDH3	1001	P22223	cadherin 3		119	0.56	0.615	2.7988e-10	0.02		1	2	0	2010	2017
Conventional (Clear Cell) Renal Cell Carcinoma	C0279702	TEC	100124696		transient erythroblastopenia of childhood		40	0.659	0.577		0.02		1	2	0	2012	2013
Conventional (Clear Cell) Renal Cell Carcinoma	C0279702	VTRNA2-1	100126299		vault RNA 2-1		44	0.641	0.538		0.02		1	2	0	2014	2017
Conventional (Clear Cell) Renal Cell Carcinoma	C0279702	MIR877	100126314		microRNA 877		34	0.67	0.385		0.02		1	2	0	2019	2019
Conventional (Clear Cell) Renal Cell Carcinoma	C0279702	MIR543	100126335		microRNA 543		68	0.593	0.692		0.02		1	2	0	2018	2018
Conventional (Clear Cell) Renal Cell Carcinoma	C0279702	SYCE1L	100130958	A8MT33	synaptonemal complex central element protein 1 like		97	0.57	0.654	2.4274e-14	0.02		1	2	0	1999	2005
Conventional (Clear Cell) Renal Cell Carcinoma	C0279702	KLLN	100144748	B2CW77	killin, p53 regulated DNA replication inhibitor		95	0.578	0.654	0.0050546	0.02		1	2	0	2011	2015
Conventional (Clear Cell) Renal Cell Carcinoma	C0279702	MIR1233-1	100302160		microRNA 1233-1		8	0.839	0.192		0.02		1	2	0	2017	2017
Conventional (Clear Cell) Renal Cell Carcinoma	C0279702	RBM14-RBM4	100526737	Q96PK6	RBM14-RBM4 readthrough		46	0.647	0.615	0.98438	0.02		1	2	0	2007	2008
Conventional (Clear Cell) Renal Cell Carcinoma	C0279702	RPL17-C18orf32	100526842		RPL17-C18orf32 readthrough		93	0.572	0.615	0.57502	0.02		1	2	0	2016	2017
Conventional (Clear Cell) Renal Cell Carcinoma	C0279702	BCL2L2-PABPN1	100529063	Q92843	BCL2L2-PABPN1 readthrough		40	0.653	0.5	0.27913	0.02		1	2	0	2015	2017
Conventional (Clear Cell) Renal Cell Carcinoma	C0279702	RAB4B-EGLN2	100529264		RAB4B-EGLN2 readthrough (NMD candidate)		51	0.641	0.654		0.02		0.5	2	0	2010	2011
Conventional (Clear Cell) Renal Cell Carcinoma	C0279702	PTPRU	10076	Q92729	protein tyrosine phosphatase receptor type U	Enzyme	88	0.581	0.654	0.39251	0.02		1	2	0	1991	1996
Conventional (Clear Cell) Renal Cell Carcinoma	C0279702	COMETT	100996266		cytosolic oncogenic antisense to MET transcript		41	0.678	0.538		0.02		1	2	0	2018	2019
Conventional (Clear Cell) Renal Cell Carcinoma	C0279702	PANDAR	101154753		promoter of CDKN1A antisense DNA damage activated RNA		51	0.623	0.577		0.02		0.5	2	0	2017	2019
Conventional (Clear Cell) Renal Cell Carcinoma	C0279702	CDH15	1013	P55291	cadherin 15		38	0.653	0.615	1.7656e-14	0.02		1	2	0	2010	2017
Conventional (Clear Cell) Renal Cell Carcinoma	C0279702	G3BP1	10146	Q13283	G3BP stress granule assembly factor 1	Nucleic acid binding	78	0.597	0.654	0.033122	0.02		1	2	0	2018	2019
Conventional (Clear Cell) Renal Cell Carcinoma	C0279702	PSME3	10197	P61289	proteasome activator subunit 3		78	0.587	0.654	0.99714	0.02		1	2	0	2017	2018
Conventional (Clear Cell) Renal Cell Carcinoma	C0279702	ADAM10	102	O14672	ADAM metallopeptidase domain 10		224	0.489	0.846	1	0.02		1	2	0	2009	2011
Conventional (Clear Cell) Renal Cell Carcinoma	C0279702	TRIM13	10206	O60858	tripartite motif containing 13		275	0.462	0.846	0.6366	0.02		1	2	0	2017	2019
Conventional (Clear Cell) Renal Cell Carcinoma	C0279702	CDK6	1021	Q00534	cyclin dependent kinase 6	Kinase	266	0.471	0.731	0.98315	0.02		1	2	0	2015	2019
Conventional (Clear Cell) Renal Cell Carcinoma	C0279702	FLOT1	10211	O75955	flotillin 1		56	0.623	0.692	1.0422e-08	0.02		1	2	0	2014	2015
Conventional (Clear Cell) Renal Cell Carcinoma	C0279702	CDK7	1022	P50613	cyclin dependent kinase 7	Kinase	89	0.566	0.731	4.4725e-07	0.02		1	2	0	2019	2020
Conventional (Clear Cell) Renal Cell Carcinoma	C0279702	CDK2AP2	10263	O75956	cyclin dependent kinase 2 associated protein 2	Enzyme modulator	117	0.544	0.808	0.78801	0.02		1	2	0	1991	1996
Conventional (Clear Cell) Renal Cell Carcinoma	C0279702	GHET1	102723099		gastric carcinoma proliferation enhancing transcript 1		40	0.647	0.308		0.02		1	2	0	2019	2019
Conventional (Clear Cell) Renal Cell Carcinoma	C0279702	PAK4	10298	O96013	p21 (RAC1) activated kinase 4	Kinase	81	0.584	0.731	4.3602e-05	0.02		1	2	0	2015	2019
Conventional (Clear Cell) Renal Cell Carcinoma	C0279702	AKR1A1	10327	P14550	aldo-keto reductase family 1 member A1	Enzyme	185	0.51	0.846	6.6621e-07	0.02		1	2	0	2018	2018
Conventional (Clear Cell) Renal Cell Carcinoma	C0279702	IRF9	10379	Q00978	interferon regulatory factor 9	Transcription factor	60	0.61	0.577	0.60773	0.02		1	2	0	2008	2018
Conventional (Clear Cell) Renal Cell Carcinoma	C0279702	DLC1	10395	Q96QB1	DLC1 Rho GTPase activating protein		144	0.529	0.731	0.99948	0.02		1	2	0	2007	2009
Conventional (Clear Cell) Renal Cell Carcinoma	C0279702	RBM14	10432	Q96PK6	RNA binding motif protein 14		54	0.628	0.615	0.99843	0.02		1	2	0	2007	2008
Conventional (Clear Cell) Renal Cell Carcinoma	C0279702	MCRS1	10445	Q96EZ8	microspherule protein 1		37	0.666	0.385	0.16561	0.02		1	2	0	2015	2017
Conventional (Clear Cell) Renal Cell Carcinoma	C0279702	HOXB13	10481	Q92826	homeobox B13		90	0.573	0.462	3.6879e-08	0.02		1	2	0	2006	2019
Conventional (Clear Cell) Renal Cell Carcinoma	C0279702	CEBPB	1051	P17676	CCAAT enhancer binding protein beta	Transcription factor	182	0.508	0.731	0.35809	0.02		1	2	0	2012	2018
Conventional (Clear Cell) Renal Cell Carcinoma	C0279702	SPTLC1	10558	O15269	serine palmitoyltransferase long chain base subunit 1	Enzyme	63	0.65	0.538	4.1945e-11	0.02		1	2	0	2019	2020
Conventional (Clear Cell) Renal Cell Carcinoma	C0279702	CXCL13	10563	O43927	C-X-C motif chemokine ligand 13	Signaling	246	0.472	0.731	0.82566	0.02		1	2	0	2018	2019
Conventional (Clear Cell) Renal Cell Carcinoma	C0279702	SLC34A2	10568	O95436	solute carrier family 34 member 2	Transporter	44	0.656	0.423	9.3992e-11	0.02		1	2	0	2012	2017
Conventional (Clear Cell) Renal Cell Carcinoma	C0279702	TXNIP	10628	Q9H3M7	thioredoxin interacting protein		208	0.49	0.731	0.15918	0.02		1	2	0	2019	2020
Conventional (Clear Cell) Renal Cell Carcinoma	C0279702	CXCR6	10663	O00574	C-X-C motif chemokine receptor 6	G-protein coupled receptor	325	0.448	0.885	5.7212e-05	0.02		1	2	0	2009	2013
Conventional (Clear Cell) Renal Cell Carcinoma	C0279702	NES	10763	P48681	nestin		302	0.45	0.808	1.6236e-06	0.02		0.5	2	0	2005	2019
Conventional (Clear Cell) Renal Cell Carcinoma	C0279702	MTHFD2	10797	P13995	methylenetetrahydrofolate dehydrogenase (NADP+ dependent) 2, methenyltetrahydrofolate cyclohydrolase	Enzyme	37	0.666	0.423	0.0023975	0.02		1	2	0	2018	2019
Conventional (Clear Cell) Renal Cell Carcinoma	C0279702	CCL27	10850	Q9Y4X3	C-C motif chemokine ligand 27	Signaling	185	0.502	0.846	0.013511	0.02		1	2	0	2014	2014
Conventional (Clear Cell) Renal Cell Carcinoma	C0279702	HPSE	10855	Q9Y251	heparanase	Enzyme	393	0.425	0.808	2.266e-14	0.02		1	2	0	2011	2012
Conventional (Clear Cell) Renal Cell Carcinoma	C0279702	PGRMC1	10857	O00264	progesterone receptor membrane component 1	Signaling	79	0.588	0.654	0.6711	0.02		1	2	0	2017	2018
Conventional (Clear Cell) Renal Cell Carcinoma	C0279702	PPARGC1A	10891	Q9UBK2	PPARG coactivator 1 alpha	Transcription factor	350	0.453	0.885	0.9973	0.02		1	2	0	2015	2019
Conventional (Clear Cell) Renal Cell Carcinoma	C0279702	SUB1	10923	P53999	SUB1 regulator of transcription		260	0.465	0.846	0.89245	0.02		1	2	0	1991	1996
Conventional (Clear Cell) Renal Cell Carcinoma	C0279702	FERMT2	10979	Q96AC1	fermitin family member 2		80	0.588	0.577	0.99999	0.02		1	2	0	2017	2018
Conventional (Clear Cell) Renal Cell Carcinoma	C0279702	LOC110013312	110013312		BGLAP promoter region		13	0.76	0.269		0.02		1	2	0	2010	2012
Conventional (Clear Cell) Renal Cell Carcinoma	C0279702	LOC110806263	110806263		TERT 5' regulatory region		245	0.464	0.731		0.02		1	2	0	2014	2015
Conventional (Clear Cell) Renal Cell Carcinoma	C0279702	RPP14	11102	O95059	ribonuclease P/MRP subunit p14		117	0.544	0.808	0.0019269	0.02		1	2	0	1991	1996
Conventional (Clear Cell) Renal Cell Carcinoma	C0279702	HHLA2	11148	Q9UM44	HERV-H LTR-associating 2	Enzyme modulator	44	0.653	0.423	1.7284e-06	0.02		1	2	0	2019	2019
Conventional (Clear Cell) Renal Cell Carcinoma	C0279702	CHI3L1	1116	P36222	chitinase 3 like 1		420	0.419	0.885	1.1133e-05	0.02		1	2	0	2014	2017
Conventional (Clear Cell) Renal Cell Carcinoma	C0279702	WIF1	11197	Q9Y5W5	WNT inhibitory factor 1	Calcium-binding protein	171	0.507	0.731	1.3249e-09	0.02		1	2	0	2006	2009
Conventional (Clear Cell) Renal Cell Carcinoma	C0279702	EGLN2	112398	Q96KS0	egl-9 family hypoxia inducible factor 2		68	0.604	0.731	0.72166	0.02		0.5	2	0	2010	2011
Conventional (Clear Cell) Renal Cell Carcinoma	C0279702	PRRT2	112476	Q7Z6L0	proline rich transmembrane protein 2		353	0.448	0.808	0.57919	0.02		1	2	0	2011	2016
Conventional (Clear Cell) Renal Cell Carcinoma	C0279702	LNCARSR	112577459		lncRNA regulator of Akt signaling associated with HCC and RCC		19	0.722	0.269		0.02		1	2	0	2016	2019
Conventional (Clear Cell) Renal Cell Carcinoma	C0279702	CYTOR	112597		cytoskeleton regulator RNA		90	0.568	0.577		0.02		1	2	0	2017	2017
Conventional (Clear Cell) Renal Cell Carcinoma	C0279702	LNCRNA-ATB	114004396		long noncoding RNA activated by TGF-beta		30	0.678	0.423		0.02		1	2	0	2017	2019
Conventional (Clear Cell) Renal Cell Carcinoma	C0279702	H3P8	115482693		H3 histone pseudogene 8		116	0.544	0.808		0.02		1	2	0	1991	1996
Conventional (Clear Cell) Renal Cell Carcinoma	C0279702	CMA1	1215	P23946	chymase 1	Enzyme	157	0.514	0.692	7.5861e-09	0.02		1	2	0	2018	2018
Conventional (Clear Cell) Renal Cell Carcinoma	C0279702	CCR4	1233	P51679	C-C motif chemokine receptor 4	G-protein coupled receptor	168	0.51	0.731	0.06863	0.02		1	2	0	2014	2017
Conventional (Clear Cell) Renal Cell Carcinoma	C0279702	COL5A1	1289	P20908	collagen type V alpha 1 chain		199	0.536	0.769	1	0.02		1	2	0	2019	2019
Conventional (Clear Cell) Renal Cell Carcinoma	C0279702	OSR1	130497	Q8TAX0	odd-skipped related transcription factor 1	Transcription factor	77	0.603	0.615	0.86296	0.02		1	2	0	2017	2018
Conventional (Clear Cell) Renal Cell Carcinoma	C0279702	COX8A	1351	P10176	cytochrome c oxidase subunit 8A	Enzyme	526	0.4	0.846	0.11606	0.02		1	2	0	2017	2020
Conventional (Clear Cell) Renal Cell Carcinoma	C0279702	PACRG	135138	Q96M98	parkin coregulated		19	0.722	0.308	2.4288e-07	0.02		1	2	0	2008	2013
Conventional (Clear Cell) Renal Cell Carcinoma	C0279702	CREB1	1385	P16220	cAMP responsive element binding protein 1		294	0.463	0.885	0.99673	0.02		1	2	0	2016	2017
Conventional (Clear Cell) Renal Cell Carcinoma	C0279702	CRH	1392	P06850	corticotropin releasing hormone	Signaling	402	0.439	0.808	0.71614	0.02		1	2	0	2016	2020
Conventional (Clear Cell) Renal Cell Carcinoma	C0279702	CRHBP	1393	P24387	corticotropin releasing hormone binding protein	Signaling	48	0.659	0.5	0.21476	0.02		1	2	0	2016	2019
Conventional (Clear Cell) Renal Cell Carcinoma	C0279702	MUC17	140453	Q685J3	mucin 17, cell surface associated		53	0.638	0.577	7.8985e-63	0.02		1	2	0	2002	2003
Conventional (Clear Cell) Renal Cell Carcinoma	C0279702	CSF1R	1436	P07333	colony stimulating factor 1 receptor	Kinase	356	0.448	0.808	0.13278	0.02		1	2	0	2008	2009
Conventional (Clear Cell) Renal Cell Carcinoma	C0279702	VCAN	1462	P13611	versican	Extracellular structure	205	0.497	0.808	1	0.02		1	2	0	2005	2017
Conventional (Clear Cell) Renal Cell Carcinoma	C0279702	CST3	1471	P01034	cystatin C		370	0.436	0.808	0.0039011	0.02		1	2	0	2017	2018
Conventional (Clear Cell) Renal Cell Carcinoma	C0279702	ADRA1A	148	P35348	adrenoceptor alpha 1A	G-protein coupled receptor	294	0.462	0.846	3.3722e-07	0.02		1	2	0	2013	2019
Conventional (Clear Cell) Renal Cell Carcinoma	C0279702	CYP2D6	1565	P10635	cytochrome P450 family 2 subfamily D member 6		432	0.437	0.885	1.0793e-25	0.02		0.5	2	0	1999	2013
Conventional (Clear Cell) Renal Cell Carcinoma	C0279702	DAG1	1605	Q14118	dystroglycan 1	Receptor	230	0.498	0.808	0.98117	0.02		1	2	0	2007	2015
Conventional (Clear Cell) Renal Cell Carcinoma	C0279702	SLFN5	162394	Q08AF3	schlafen family member 5		25	0.7	0.269	1.7046e-12	0.02		1	2	0	2015	2019
Conventional (Clear Cell) Renal Cell Carcinoma	C0279702	RASSF6	166824	Q6ZTQ3	Ras association domain family member 6	Enzyme modulator	53	0.626	0.654	2.7376e-26	0.02		1	2	0	2014	2018
Conventional (Clear Cell) Renal Cell Carcinoma	C0279702	NQO1	1728	P15559	NAD(P)H quinone dehydrogenase 1		368	0.434	0.885	1.1867e-09	0.02		0.5	2	0	1999	2019
Conventional (Clear Cell) Renal Cell Carcinoma	C0279702	DIO1	1733	P49895	iodothyronine deiodinase 1		51	0.638	0.769	0.58399	0.02		1	2	0	2010	2011
Conventional (Clear Cell) Renal Cell Carcinoma	C0279702	DKC1	1736	O60832	dyskerin pseudouridine synthase 1	Nucleic acid binding	168	0.547	0.769	0.99916	0.02		1	2	0	2018	2019
Conventional (Clear Cell) Renal Cell Carcinoma	C0279702	AGER	177	Q15109	advanced glycosylation end-product specific receptor	Receptor	450	0.42	0.885	6.3528e-16	0.02		1	2	0	2012	2018
Conventional (Clear Cell) Renal Cell Carcinoma	C0279702	JAG1	182	P78504	jagged canonical Notch ligand 1		420	0.429	0.808	1	0.02		1	2	0	2008	2011
Conventional (Clear Cell) Renal Cell Carcinoma	C0279702	AGT	183	P01019	angiotensinogen	Enzyme modulator	765	0.367	0.923	4.9706e-08	0.02		1	2	0	1995	2010
Conventional (Clear Cell) Renal Cell Carcinoma	C0279702	DUSP9	1852	Q99956	dual specificity phosphatase 9		26	0.705	0.308	0.81981	0.02		1	2	0	2010	2011
Conventional (Clear Cell) Renal Cell Carcinoma	C0279702	E2F3	1871	O00716	E2F transcription factor 3	Nucleic acid binding	98	0.57	0.692	0.9458	0.02		1	2	0	2015	2017
Conventional (Clear Cell) Renal Cell Carcinoma	C0279702	TYMP	1890	P19971	thymidine phosphorylase	Enzyme	246	0.495	0.769	0.00011694	0.02		1	2	0	2017	2018
Conventional (Clear Cell) Renal Cell Carcinoma	C0279702	EDNRA	1909	P25101	endothelin receptor type A	G-protein coupled receptor	427	0.426	0.885	0.99158	0.02		1	2	0	2007	2013
Conventional (Clear Cell) Renal Cell Carcinoma	C0279702	EEF1A1	1915	P68104	eukaryotic translation elongation factor 1 alpha 1	Enzyme	88	0.584	0.654	0.97863	0.02		1	2	0	2017	2020
Conventional (Clear Cell) Renal Cell Carcinoma	C0279702	EGR1	1958	P18146	early growth response 1	Nucleic acid binding	378	0.433	0.923	0.3509	0.02		1	2	0	2012	2018
Conventional (Clear Cell) Renal Cell Carcinoma	C0279702	AHR	196	P35869	aryl hydrocarbon receptor	Transcription factor	532	0.41	0.923	0.99999	0.02		1	2	0	2015	2019
Conventional (Clear Cell) Renal Cell Carcinoma	C0279702	EPHA2	1969	P29317	EPH receptor A2	Kinase	187	0.501	0.731	1.073e-05	0.02		1	2	0	2014	2015
Conventional (Clear Cell) Renal Cell Carcinoma	C0279702	ENO1	2023	P06733	enolase 1	Enzyme	231	0.481	0.885	1.914e-05	0.02		1	2	0	2015	2017
Conventional (Clear Cell) Renal Cell Carcinoma	C0279702	ENO2	2026	P09104	enolase 2	Enzyme	239	0.475	0.846	0.38396	0.02		1	2	0	2017	2018
Conventional (Clear Cell) Renal Cell Carcinoma	C0279702	EP300	2033	Q09472	E1A binding protein p300		345	0.459	0.846	1	0.02		1	2	0	2017	2018
Conventional (Clear Cell) Renal Cell Carcinoma	C0279702	ERCC2	2068	P18074	ERCC excision repair 2, TFIIH core complex helicase subunit	Enzyme	499	0.42	0.846	7.0654e-20	0.02		1	2	2	2008	2016
Conventional (Clear Cell) Renal Cell Carcinoma	C0279702	ETFA	2108	P13804	electron transfer flavoprotein subunit alpha	Enzyme	195	0.508	0.731	0.0029217	0.02		0.5	2	0	2010	2014
Conventional (Clear Cell) Renal Cell Carcinoma	C0279702	ETS1	2113	P14921	ETS proto-oncogene 1, transcription factor	Transcription factor	327	0.444	0.731	0.7816	0.02		1	2	0	2015	2018
Conventional (Clear Cell) Renal Cell Carcinoma	C0279702	F2R	2149	P25116	coagulation factor II thrombin receptor	G-protein coupled receptor	347	0.444	0.846	0.0084678	0.02		1	2	0	2013	2017
Conventional (Clear Cell) Renal Cell Carcinoma	C0279702	F2RL1	2150	P55085	F2R like trypsin receptor 1	G-protein coupled receptor	256	0.48	0.769	0.00014843	0.02		1	2	0	2007	2015
Conventional (Clear Cell) Renal Cell Carcinoma	C0279702	F3	2152	P13726	coagulation factor III, tissue factor	Receptor	456	0.415	0.846	0.018872	0.02		1	2	0	2018	2019
Conventional (Clear Cell) Renal Cell Carcinoma	C0279702	F12	2161	P00748	coagulation factor XII	Enzyme	87	0.612	0.577	8.2526e-08	0.02		1	2	0	2015	2017
Conventional (Clear Cell) Renal Cell Carcinoma	C0279702	PTK2B	2185	Q14289	protein tyrosine kinase 2 beta	Kinase	319	0.448	0.808	0.93536	0.02		1	2	0	2018	2019
Conventional (Clear Cell) Renal Cell Carcinoma	C0279702	FBN2	2201	P35556	fibrillin 2	Calcium-binding protein	211	0.505	0.808	1	0.02		1	2	0	2011	2014
Conventional (Clear Cell) Renal Cell Carcinoma	C0279702	SKA1	220134	Q96BD8	spindle and kinetochore associated complex subunit 1		42	0.65	0.462	1.7022e-05	0.02		1	2	0	2017	2019
Conventional (Clear Cell) Renal Cell Carcinoma	C0279702	FBP1	2203	P09467	fructose-bisphosphatase 1	Enzyme	125	0.575	0.692	0.079124	0.02		1	2	0	2014	2019
Conventional (Clear Cell) Renal Cell Carcinoma	C0279702	FCGR3A	2214	P08637	Fc fragment of IgG receptor IIIa	Cell adhesion	352	0.432	0.962	3.6955e-06	0.02		1	2	0	2006	2006
Conventional (Clear Cell) Renal Cell Carcinoma	C0279702	FCGR3B	2215	O75015	Fc fragment of IgG receptor IIIb	Cell adhesion	291	0.452	0.962	3.0294e-07	0.02		1	2	0	2006	2006
Conventional (Clear Cell) Renal Cell Carcinoma	C0279702	FGFR2	2263	P21802	fibroblast growth factor receptor 2	Kinase	731	0.38	0.808	0.99731	0.02		1	2	1	2017	2019
Conventional (Clear Cell) Renal Cell Carcinoma	C0279702	VASH1	22846	Q7L8A9	vasohibin 1		69	0.601	0.423	0.32566	0.02		1	2	0	2017	2017
Conventional (Clear Cell) Renal Cell Carcinoma	C0279702	SMG1	23049	Q96Q15	SMG1 nonsense mediated mRNA decay associated PI3K related kinase	Kinase	90	0.575	0.808	1	0.02		1	2	0	2013	2016
Conventional (Clear Cell) Renal Cell Carcinoma	C0279702	NCOA6	23054	Q14686	nuclear receptor coactivator 6	Nucleic acid binding	64	0.647	0.731	0.99913	0.02		1	2	0	1998	1999
Conventional (Clear Cell) Renal Cell Carcinoma	C0279702	EPB41L3	23136	Q9Y2J2	erythrocyte membrane protein band 4.1 like 3		63	0.619	0.615	4.3188e-05	0.02		1	2	0	2006	2012
Conventional (Clear Cell) Renal Cell Carcinoma	C0279702	KANK1	23189	Q14678	KN motif and ankyrin repeat domains 1		56	0.641	0.538	7.9821e-18	0.02		1	2	0	2005	2015
Conventional (Clear Cell) Renal Cell Carcinoma	C0279702	ARC	23237	Q7LC44	activity regulated cytoskeleton associated protein		101	0.573	0.769	0.59433	0.02		1	2	0	2008	2017
Conventional (Clear Cell) Renal Cell Carcinoma	C0279702	SATB2	23314	Q9UPW6	SATB homeobox 2	Transcription factor	233	0.503	0.769	0.99999	0.02		1	2	0	2015	2018
Conventional (Clear Cell) Renal Cell Carcinoma	C0279702	PPP1R13B	23368	Q96KQ4	protein phosphatase 1 regulatory subunit 13B	Enzyme modulator	70	0.599	0.692	0.99811	0.02		1	2	0	2017	2018
Conventional (Clear Cell) Renal Cell Carcinoma	C0279702	SIRT3	23410	Q9NTG7	sirtuin 3	Epigenetic regulator	227	0.488	0.731	0.00016261	0.02		1	2	0	2018	2018
Conventional (Clear Cell) Renal Cell Carcinoma	C0279702	FOS	2353	P01100	Fos proto-oncogene, AP-1 transcription factor subunit	Transcription factor	528	0.411	0.885	0.26176	0.02		1	2	0	2017	2018
Conventional (Clear Cell) Renal Cell Carcinoma	C0279702	SEC14L2	23541	O76054	SEC14 like lipid binding 2		198	0.494	0.885	2.9195e-08	0.02		1	2	0	1997	2003
Conventional (Clear Cell) Renal Cell Carcinoma	C0279702	SNHG1	23642		small nucleolar RNA host gene 1		83	0.576	0.692		0.02		1	2	0	2018	2019
Conventional (Clear Cell) Renal Cell Carcinoma	C0279702	PLA2G15	23659	Q8NCC3	phospholipase A2 group XV	Enzyme	170	0.52	0.769	0.37838	0.02		1	2	0	1997	2018
Conventional (Clear Cell) Renal Cell Carcinoma	C0279702	ALOX12	239	P18054	arachidonate 12-lipoxygenase, 12S type	Enzyme	119	0.558	0.692	1.4397e-15	0.02		1	2	0	2004	2005
Conventional (Clear Cell) Renal Cell Carcinoma	C0279702	ALOX15	246	P16050	arachidonate 15-lipoxygenase	Enzyme	205	0.502	0.846	1.1397e-23	0.02		1	2	0	2004	2005
Conventional (Clear Cell) Renal Cell Carcinoma	C0279702	CADM2	253559	Q8N3J6	cell adhesion molecule 2		58	0.67	0.538	0.89097	0.02		1	2	0	2013	2018
Conventional (Clear Cell) Renal Cell Carcinoma	C0279702	G6PC	2538	P35575	glucose-6-phosphatase catalytic subunit		132	0.56	0.692	1.8404e-05	0.02		0.5	2	0	2001	2018
Conventional (Clear Cell) Renal Cell Carcinoma	C0279702	G6PD	2539	P11413	glucose-6-phosphate dehydrogenase	Enzyme	410	0.424	0.846	0.97158	0.02		1	2	0	2017	2017
Conventional (Clear Cell) Renal Cell Carcinoma	C0279702	GAD1	2571	Q99259	glutamate decarboxylase 1	Enzyme	245	0.486	0.885	0.046164	0.02		1	2	0	2014	2018
Conventional (Clear Cell) Renal Cell Carcinoma	C0279702	QPCT	25797	Q16769	glutaminyl-peptide cyclotransferase	Enzyme	94	0.568	0.731	1.1987e-15	0.02		1	2	0	2011	2019
Conventional (Clear Cell) Renal Cell Carcinoma	C0279702	RWDD3	25950	Q9Y3V2	RWD domain containing 3		18	0.751	0.269	0.0014761	0.02		1	2	0	2015	2019
Conventional (Clear Cell) Renal Cell Carcinoma	C0279702	ATRNL1	26033	Q5VV63	attractin like 1	Enzyme modulator	117	0.546	0.769	0.99915	0.02		1	2	0	2014	2014
Conventional (Clear Cell) Renal Cell Carcinoma	C0279702	INTS1	26173	Q8N201	integrator complex subunit 1		41	0.666	0.5	7.1069e-11	0.02		1	2	0	2005	2019
Conventional (Clear Cell) Renal Cell Carcinoma	C0279702	GAS6	2621	Q14393	growth arrest specific 6	Extracellular structure	190	0.5	0.769	0.034477	0.02		1	2	0	2009	2019
Conventional (Clear Cell) Renal Cell Carcinoma	C0279702	GC	2638	P02774	GC vitamin D binding protein	Transporter	219	0.489	0.885	2.7301e-11	0.02		1	2	0	2018	2019
Conventional (Clear Cell) Renal Cell Carcinoma	C0279702	MAGEA2B	266740	P43356	MAGE family member A2B	Cell adhesion	29	0.7	0.385		0.02		1	2	0	2017	2018
Conventional (Clear Cell) Renal Cell Carcinoma	C0279702	TCL6	27004		T cell leukemia/lymphoma 6		8	0.821	0.462		0.02		1	2	0	2017	2017
Conventional (Clear Cell) Renal Cell Carcinoma	C0279702	CACYBP	27101	Q9HB71	calcyclin binding protein	Enzyme	61	0.617	0.692	0.91984	0.02		1	2	0	2007	2010
Conventional (Clear Cell) Renal Cell Carcinoma	C0279702	DKK4	27121	Q9UBT3	dickkopf WNT signaling pathway inhibitor 4		51	0.647	0.5	0.00076744	0.02		1	2	0	2009	2014
Conventional (Clear Cell) Renal Cell Carcinoma	C0279702	DKK2	27123	Q9UBU2	dickkopf WNT signaling pathway inhibitor 2		74	0.599	0.692	0.75318	0.02		1	2	1	2009	2009
Conventional (Clear Cell) Renal Cell Carcinoma	C0279702	AGO2	27161	Q9UKV8	argonaute RISC catalytic component 2		186	0.501	0.885	1	0.02		1	2	0	2019	2019
Conventional (Clear Cell) Renal Cell Carcinoma	C0279702	SLC39A1	27173	Q9NY26	solute carrier family 39 member 1	Transporter	24	0.722	0.423	0.12586	0.02		0.5	2	0	2014	2018
Conventional (Clear Cell) Renal Cell Carcinoma	C0279702	PDCD4	27250	Q53EL6	programmed cell death 4	Nucleic acid binding	198	0.494	0.769	3.3572e-07	0.02		1	2	0	2014	2017
Conventional (Clear Cell) Renal Cell Carcinoma	C0279702	PCDH17	27253	O14917	protocadherin 17		51	0.633	0.577	0.64056	0.02		1	2	0	2015	2017
Conventional (Clear Cell) Renal Cell Carcinoma	C0279702	PDLIM3	27295	Q53GG5	PDZ and LIM domain 3	Cellular structure	118	0.547	0.769	3.032e-07	0.02		1	2	0	2014	2014
Conventional (Clear Cell) Renal Cell Carcinoma	C0279702	ANGPTL3	27329	Q9Y5C1	angiopoietin like 3	Signaling	81	0.584	0.577	1.6455e-13	0.02		1	2	0	2018	2019
Conventional (Clear Cell) Renal Cell Carcinoma	C0279702	MCAT	27349	Q8IVS2	malonyl-CoA-acyl carrier protein transacylase		147	0.524	0.808	0.00030611	0.02		1	2	0	2018	2018
Conventional (Clear Cell) Renal Cell Carcinoma	C0279702	GLS	2744	O94925	glutaminase	Enzyme	217	0.489	0.808	0.96154	0.02		1	2	0	2017	2017
Conventional (Clear Cell) Renal Cell Carcinoma	C0279702	GOT2	2806	P00505	glutamic-oxaloacetic transaminase 2		148	0.529	0.731	0.014233	0.02		1	2	0	2007	2020
Conventional (Clear Cell) Renal Cell Carcinoma	C0279702	CXCR3	2833	P49682	C-X-C motif chemokine receptor 3	G-protein coupled receptor	367	0.436	0.808	0.181	0.02		1	2	0	2009	2016
Conventional (Clear Cell) Renal Cell Carcinoma	C0279702	LAMTOR2	28956	Q9Y2Q5	late endosomal/lysosomal adaptor, MAPK and MTOR activator 2		129	0.538	0.808	0.19816	0.02		1	2	0	1991	1996
Conventional (Clear Cell) Renal Cell Carcinoma	C0279702	MCTS1	28985	Q9ULC4	MCTS1 re-initiation and release factor	Receptor	109	0.552	0.692	0.87474	0.02		1	2	0	2018	2018
Conventional (Clear Cell) Renal Cell Carcinoma	C0279702	GRP	2922	P07492	gastrin releasing peptide		172	0.524	0.769	0.0025347	0.02		1	2	0	2000	2005
Conventional (Clear Cell) Renal Cell Carcinoma	C0279702	GSTM3	2947	P21266	glutathione S-transferase mu 3		111	0.552	0.808	4.3638e-07	0.02		1	2	3	2013	2018
Conventional (Clear Cell) Renal Cell Carcinoma	C0279702	TFCP2L1	29842	Q9NZI6	transcription factor CP2 like 1	Transcription factor	26	0.751	0.346	0.99996	0.02		1	2	0	2014	2018
Conventional (Clear Cell) Renal Cell Carcinoma	C0279702	SENP1	29843	Q9P0U3	SUMO specific peptidase 1	Enzyme	79	0.593	0.654	0.99358	0.02		1	2	0	2016	2018
Conventional (Clear Cell) Renal Cell Carcinoma	C0279702	OBP2A	29991	Q9NY56	odorant binding protein 2A	Enzyme	71	0.61	0.462	1.5163e-06	0.02		1	2	0	2010	2013
Conventional (Clear Cell) Renal Cell Carcinoma	C0279702	ANXA2	302	P07355	annexin A2		294	0.453	0.808	9.7728e-05	0.02		1	2	0	2004	2015
Conventional (Clear Cell) Renal Cell Carcinoma	C0279702	ANXA5	308	P08758	annexin A5		283	0.458	0.769	3.7978e-15	0.02		1	2	0	2017	2017
Conventional (Clear Cell) Renal Cell Carcinoma	C0279702	HK2	3099	P52789	hexokinase 2	Kinase	152	0.515	0.769	0.0045893	0.02		1	2	0	2013	2018
Conventional (Clear Cell) Renal Cell Carcinoma	C0279702	NR4A1	3164	P22736	nuclear receptor subfamily 4 group A member 1	Nuclear receptor	216	0.49	0.731	0.37074	0.02		1	2	0	2004	2015
Conventional (Clear Cell) Renal Cell Carcinoma	C0279702	HNRNPA2B1	3181	P22626	heterogeneous nuclear ribonucleoprotein A2/B1		131	0.566	0.808	0.99732	0.02		0	2	0	2010	2011
Conventional (Clear Cell) Renal Cell Carcinoma	C0279702	HOXA6	3203	P31267	homeobox A6	Transcription factor	18	0.736	0.5	2.9887e-06	0.02		1	2	0	2019	2019
Conventional (Clear Cell) Renal Cell Carcinoma	C0279702	APC	324	P25054	APC regulator of WNT signaling pathway		703	0.373	0.962	1	0.02		1	2	2	1999	2020
Conventional (Clear Cell) Renal Cell Carcinoma	C0279702	APEX1	328	P27695	apurinic/apyrimidinic endodeoxyribonuclease 1		305	0.458	0.846	1.9191e-07	0.02		1	2	2	2011	2019
Conventional (Clear Cell) Renal Cell Carcinoma	C0279702	HSPA1A	3303	P0DMV8;P0DMV9	heat shock protein family A (Hsp70) member 1A		229	0.486	0.769	0.030228	0.02		1	2	0	1999	2014
Conventional (Clear Cell) Renal Cell Carcinoma	C0279702	HSPA1B	3304	P0DMV8;P0DMV9	heat shock protein family A (Hsp70) member 1B		251	0.474	0.808	0.0053464	0.02		1	2	0	1999	2014
Conventional (Clear Cell) Renal Cell Carcinoma	C0279702	HSPA2	3306	P54652	heat shock protein family A (Hsp70) member 2		115	0.55	0.808	0.048648	0.02		1	2	0	1999	2014
Conventional (Clear Cell) Renal Cell Carcinoma	C0279702	HSPA4	3308	P34932	heat shock protein family A (Hsp70) member 4		550	0.394	0.923	0.99954	0.02		1	2	0	1998	2014
Conventional (Clear Cell) Renal Cell Carcinoma	C0279702	HSPB2	3316	Q16082	heat shock protein family B (small) member 2		290	0.457	0.769	0.00032989	0.02		1	2	0	2011	2014
Conventional (Clear Cell) Renal Cell Carcinoma	C0279702	IRF8	3394	Q02556	interferon regulatory factor 8	Transcription factor	149	0.539	0.808	0.94807	0.02		1	2	0	2014	2019
Conventional (Clear Cell) Renal Cell Carcinoma	C0279702	IFNAR2	3455	P48551	interferon alpha and beta receptor subunit 2	Receptor	85	0.585	0.731	8.5332e-06	0.02		1	2	0	2007	2011
Conventional (Clear Cell) Renal Cell Carcinoma	C0279702	APOE	348	P02649	apolipoprotein E		1049	0.338	0.962	0.0018685	0.02		1	2	1	2009	2015
Conventional (Clear Cell) Renal Cell Carcinoma	C0279702	IGFBP7	3490	Q16270	insulin like growth factor binding protein 7		241	0.476	0.769	0.0012873	0.02		1	2	0	2011	2017
Conventional (Clear Cell) Renal Cell Carcinoma	C0279702	CCN1	3491	O00622	cellular communication network factor 1	Signaling	246	0.473	0.731	0.71388	0.02		1	2	0	2008	2013
Conventional (Clear Cell) Renal Cell Carcinoma	C0279702	IKBKB	3551	O14920	inhibitor of nuclear factor kappa B kinase subunit beta	Kinase	191	0.506	0.846	0.99192	0.02		1	2	0	2018	2019
Conventional (Clear Cell) Renal Cell Carcinoma	C0279702	IL1A	3552	P01583	interleukin 1 alpha		1002	0.333	0.962	0.0001602	0.02		1	2	4	2014	2017
Conventional (Clear Cell) Renal Cell Carcinoma	C0279702	IL2RA	3559	P01589	interleukin 2 receptor subunit alpha	Receptor	540	0.389	0.885	0.054709	0.02		1	2	0	1993	2009
Conventional (Clear Cell) Renal Cell Carcinoma	C0279702	FASLG	356	P48023	Fas ligand	Signaling	398	0.43	0.885	0.18345	0.02		1	2	0	2010	2019
Conventional (Clear Cell) Renal Cell Carcinoma	C0279702	IL11	3589	P20809	interleukin 11		244	0.481	0.808	0.00031772	0.02		1	2	0	2016	2017
Conventional (Clear Cell) Renal Cell Carcinoma	C0279702	IL13RA2	3598	Q14627	interleukin 13 receptor subunit alpha 2	Signaling	103	0.556	0.654	4.021e-07	0.02		0.5	2	0	1996	2015
Conventional (Clear Cell) Renal Cell Carcinoma	C0279702	IL16	3603	Q14005	interleukin 16	Signaling	193	0.501	0.846	1.2449e-10	0.02		0.5	2	2	2010	2019
Conventional (Clear Cell) Renal Cell Carcinoma	C0279702	ITGA7	3679	Q13683	integrin subunit alpha 7		111	0.588	0.654	4.2657e-17	0.02		1	2	0	2018	2020
Conventional (Clear Cell) Renal Cell Carcinoma	C0279702	KLK1	3816	P06870	kallikrein 1	Enzyme	132	0.533	0.769	0.00015311	0.02		1	2	0	1999	2010
Conventional (Clear Cell) Renal Cell Carcinoma	C0279702	KIF22	3835	Q14807	kinesin family member 22	Cellular structure	150	0.552	0.654	9.1697e-10	0.02		1	2	0	2010	2013
Conventional (Clear Cell) Renal Cell Carcinoma	C0279702	KMT5A	387893	Q9NQR1	lysine methyltransferase 5A		49	0.633	0.538	0.98528	0.02		1	2	1	2017	2019
Conventional (Clear Cell) Renal Cell Carcinoma	C0279702	LAG3	3902	P18627	lymphocyte activating 3	Receptor	154	0.517	0.692	0.27623	0.02		1	2	0	2019	2019
Conventional (Clear Cell) Renal Cell Carcinoma	C0279702	LAMA4	3910	Q16363	laminin subunit alpha 4		44	0.682	0.577	1.3909e-24	0.02		1	2	0	2017	2019
Conventional (Clear Cell) Renal Cell Carcinoma	C0279702	LDLR	3949	P01130	low density lipoprotein receptor		336	0.449	0.885	9.841e-24	0.02		0.5	2	0	1996	2017
Conventional (Clear Cell) Renal Cell Carcinoma	C0279702	LHX1	3975	P48742	LIM homeobox 1	Nucleic acid binding	44	0.691	0.385	0.029231	0.02		1	2	0	2011	2019
Conventional (Clear Cell) Renal Cell Carcinoma	C0279702	LOX	4015	P28300	lysyl oxidase		328	0.447	0.846	0.98769	0.02		1	2	0	2001	2019
Conventional (Clear Cell) Renal Cell Carcinoma	C0279702	LRPAP1	4043	P30533	LDL receptor related protein associated protein 1		95	0.579	0.731	4.4951e-07	0.02		1	2	0	2000	2004
Conventional (Clear Cell) Renal Cell Carcinoma	C0279702	MIRLET7D	406886		microRNA let-7d		82	0.579	0.692		0.02		1	2	0	2014	2015
Conventional (Clear Cell) Renal Cell Carcinoma	C0279702	MIR100	406892		microRNA 100		146	0.521	0.846		0.02		1	2	0	2013	2017
Conventional (Clear Cell) Renal Cell Carcinoma	C0279702	MIR10A	406902		microRNA 10a		158	0.513	0.846		0.02		1	2	0	2017	2019
Conventional (Clear Cell) Renal Cell Carcinoma	C0279702	MIR130B	406920		microRNA 130b		115	0.547	0.808		0.02		1	2	0	2016	2019
Conventional (Clear Cell) Renal Cell Carcinoma	C0279702	MIR137	406928		microRNA 137		171	0.513	0.846		0.02		1	2	0	2018	2018
Conventional (Clear Cell) Renal Cell Carcinoma	C0279702	MIR142	406934		microRNA 142		220	0.48	0.846		0.02		1	2	0	2017	2019
Conventional (Clear Cell) Renal Cell Carcinoma	C0279702	MIR143	406935		microRNA 143		267	0.462	0.885		0.02		1	2	0	2013	2015
Conventional (Clear Cell) Renal Cell Carcinoma	C0279702	MIR146A	406938		microRNA 146a		505	0.398	0.885		0.02		1	2	1	2015	2018
Conventional (Clear Cell) Renal Cell Carcinoma	C0279702	MIR149	406941		microRNA 149		140	0.524	0.769		0.02		1	2	2	2014	2018
Conventional (Clear Cell) Renal Cell Carcinoma	C0279702	MIR150	406942		microRNA 150		282	0.455	0.808		0.02		1	2	0	2012	2018
Conventional (Clear Cell) Renal Cell Carcinoma	C0279702	MIR184	406960		microRNA 184		119	0.542	0.769		0.02		1	2	0	2010	2016
Conventional (Clear Cell) Renal Cell Carcinoma	C0279702	MIR191	406966		microRNA 191		112	0.548	0.731		0.02		1	2	0	2012	2018
Conventional (Clear Cell) Renal Cell Carcinoma	C0279702	MIR193A	406968		microRNA 193a		116	0.541	0.731		0.02		1	2	0	2017	2018
Conventional (Clear Cell) Renal Cell Carcinoma	C0279702	MIR19B1	406980		microRNA 19b-1		144	0.529	0.769		0.02		1	2	0	2018	2019
Conventional (Clear Cell) Renal Cell Carcinoma	C0279702	MIR20A	406982		microRNA 20a		180	0.498	0.769		0.02		1	2	0	2010	2019
Conventional (Clear Cell) Renal Cell Carcinoma	C0279702	MIR211	406993		microRNA 211		106	0.552	0.577		0.02		1	2	0	2017	2018
Conventional (Clear Cell) Renal Cell Carcinoma	C0279702	MIR212	406994		microRNA 212		126	0.535	0.808		0.02		1	2	0	2017	2018
Conventional (Clear Cell) Renal Cell Carcinoma	C0279702	MIR215	406997		microRNA 215		96	0.559	0.654		0.02		1	2	0	2011	2013
Conventional (Clear Cell) Renal Cell Carcinoma	C0279702	MIR216A	406998		microRNA 216a		79	0.582	0.654		0.02		1	2	0	2018	2018
Conventional (Clear Cell) Renal Cell Carcinoma	C0279702	MIR217	406999		microRNA 217		116	0.543	0.769		0.02		1	2	0	2013	2017
Conventional (Clear Cell) Renal Cell Carcinoma	C0279702	MIR23A	407010		microRNA 23a		174	0.499	0.808		0.02		1	2	0	2017	2019
Conventional (Clear Cell) Renal Cell Carcinoma	C0279702	MIR23B	407011		microRNA 23b		137	0.523	0.808		0.02		1	2	0	2012	2018
Conventional (Clear Cell) Renal Cell Carcinoma	C0279702	MIR28	407020		microRNA 28		75	0.597	0.731		0.02		1	2	0	2014	2016
Conventional (Clear Cell) Renal Cell Carcinoma	C0279702	MIR30B	407030		microRNA 30b		109	0.555	0.808		0.02		1	2	0	2017	2017
Conventional (Clear Cell) Renal Cell Carcinoma	C0279702	MIR31	407035		microRNA 31		235	0.471	0.769		0.02		1	2	0	2019	2020
Conventional (Clear Cell) Renal Cell Carcinoma	C0279702	MIR96	407053		microRNA 96		134	0.536	0.769		0.02		1	2	0	2015	2020
Conventional (Clear Cell) Renal Cell Carcinoma	C0279702	EPCAM	4072	P16422	epithelial cell adhesion molecule		328	0.451	0.885	1.2844e-07	0.02		1	2	0	2010	2017
Conventional (Clear Cell) Renal Cell Carcinoma	C0279702	SMAD3	4088	P84022	SMAD family member 3	Transcription factor	470	0.415	0.923	0.79796	0.02		1	2	0	2018	2020
Conventional (Clear Cell) Renal Cell Carcinoma	C0279702	MAGEA2	4101	P43356	MAGE family member A2		38	0.663	0.385		0.02		1	2	0	2017	2018
Conventional (Clear Cell) Renal Cell Carcinoma	C0279702	MDM4	4194	O15151	MDM4 regulator of p53	Nucleic acid binding	265	0.461	0.808	0.99992	0.02		1	2	0	2013	2019
Conventional (Clear Cell) Renal Cell Carcinoma	C0279702	MAP3K5	4217	Q99683	mitogen-activated protein kinase kinase kinase 5	Kinase	170	0.513	0.808	0.51964	0.02		1	2	0	2009	2017
Conventional (Clear Cell) Renal Cell Carcinoma	C0279702	MGMT	4255	P16455	O-6-methylguanine-DNA methyltransferase		444	0.412	0.885	1.1756e-07	0.02		1	2	0	2009	2015
Conventional (Clear Cell) Renal Cell Carcinoma	C0279702	CXCL9	4283	Q07325	C-X-C motif chemokine ligand 9	Signaling	269	0.462	0.808	0.0029304	0.02		1	2	0	2004	2009
Conventional (Clear Cell) Renal Cell Carcinoma	C0279702	MIP	4284	P30301	major intrinsic protein of lens fiber	Ion channel	181	0.507	0.846	0.030956	0.02		1	2	0	2011	2019
Conventional (Clear Cell) Renal Cell Carcinoma	C0279702	MRC1	4360	P22897	mannose receptor C-type 1		431	0.413	0.846	0.94335	0.02		1	2	0	2003	2012
Conventional (Clear Cell) Renal Cell Carcinoma	C0279702	MIR133B	442890		microRNA 133b		109	0.555	0.808		0.02		1	2	0	2014	2016
Conventional (Clear Cell) Renal Cell Carcinoma	C0279702	MIR335	442904		microRNA 335		141	0.521	0.808		0.02		1	2	0	2015	2017
Conventional (Clear Cell) Renal Cell Carcinoma	C0279702	MIR337	442905		microRNA 337		63	0.61	0.692		0.02		1	2	0	2012	2018
Conventional (Clear Cell) Renal Cell Carcinoma	C0279702	MIR372	442917		microRNA 372		72	0.593	0.615		0.02		1	2	0	2015	2019
Conventional (Clear Cell) Renal Cell Carcinoma	C0279702	MIR373	442918		microRNA 373		97	0.556	0.692		0.02		1	2	0	2017	2019
Conventional (Clear Cell) Renal Cell Carcinoma	C0279702	MUC3A	4584	Q02505	mucin 3A, cell surface associated		52	0.636	0.5	1.4752e-10	0.02		1	2	0	2002	2003
Conventional (Clear Cell) Renal Cell Carcinoma	C0279702	MYCN	4613	P04198	MYCN proto-oncogene, bHLH transcription factor	Transcription factor	314	0.454	0.808	0.88897	0.02		1	2	0	2014	2017
Conventional (Clear Cell) Renal Cell Carcinoma	C0279702	ATHS	470		atherosclerosis susceptibility (lipoprotein associated)		112	0.551	0.769		0.02		1	2	0	2014	2014
Conventional (Clear Cell) Renal Cell Carcinoma	C0279702	ATP1A1	476	P05023	ATPase Na+/K+ transporting subunit alpha 1	Transporter	89	0.601	0.808	1	0.02		1	2	0	2017	2018
Conventional (Clear Cell) Renal Cell Carcinoma	C0279702	NFKB2	4791	Q00653	nuclear factor kappa B subunit 2	Transcription factor	194	0.509	0.808	1	0.02		1	2	0	1998	2018
Conventional (Clear Cell) Renal Cell Carcinoma	C0279702	ATP1B1	481	P05026	ATPase Na+/K+ transporting subunit beta 1	Transporter	34	0.7	0.462	0.99881	0.02		1	2	0	2014	2018
Conventional (Clear Cell) Renal Cell Carcinoma	C0279702	NONO	4841	Q15233	non-POU domain containing octamer binding	Nucleic acid binding	142	0.554	0.731	0.9935	0.02		1	2	0	2017	2019
Conventional (Clear Cell) Renal Cell Carcinoma	C0279702	NPTX2	4885	P47972	neuronal pentraxin 2		67	0.617	0.615	0.030511	0.02		1	2	0	2014	2020
Conventional (Clear Cell) Renal Cell Carcinoma	C0279702	P2RY1	5028	P47900	purinergic receptor P2Y1	G-protein coupled receptor	126	0.551	0.769	0.51522	0.02		1	2	0	2016	2017
Conventional (Clear Cell) Renal Cell Carcinoma	C0279702	NOX4	50507	Q9NPH5	NADPH oxidase 4	Enzyme	260	0.471	0.885	5.7555e-20	0.02		0.5	2	0	2005	2014
Conventional (Clear Cell) Renal Cell Carcinoma	C0279702	APH1A	51107	Q96BI3	aph-1 homolog A, gamma-secretase subunit	Enzyme modulator	45	0.656	0.538	0.79479	0.02		1	2	0	2011	2017
Conventional (Clear Cell) Renal Cell Carcinoma	C0279702	ING4	51147	Q9UNL4	inhibitor of growth family member 4	Nucleic acid binding	92	0.573	0.577	0.029013	0.02		1	2	0	2017	2019
Conventional (Clear Cell) Renal Cell Carcinoma	C0279702	SF3B6	51639	Q9Y3B4	splicing factor 3b subunit 6		116	0.544	0.808	0.58902	0.02		1	2	0	1991	1996
Conventional (Clear Cell) Renal Cell Carcinoma	C0279702	MPC1	51660	Q9Y5U8	mitochondrial pyruvate carrier 1	Transporter	56	0.653	0.577	0.038495	0.02		1	2	0	2018	2019
Conventional (Clear Cell) Renal Cell Carcinoma	C0279702	ENPP2	5168	Q13822	ectonucleotide pyrophosphatase/phosphodiesterase 2	Enzyme	95	0.582	0.769	0.0027913	0.02		1	2	0	2013	2016
Conventional (Clear Cell) Renal Cell Carcinoma	C0279702	PDPK1	5170	O15530	3-phosphoinositide dependent protein kinase 1	Kinase	77	0.588	0.808	0.98013	0.02		1	2	0	2017	2019
Conventional (Clear Cell) Renal Cell Carcinoma	C0279702	PDZK1	5174	Q5T2W1	PDZ domain containing 1		47	0.65	0.654	1.1586e-09	0.02		1	2	0	2017	2017
Conventional (Clear Cell) Renal Cell Carcinoma	C0279702	SLC25A3	5250	Q00325	solute carrier family 25 member 3	Transporter	112	0.566	0.692	0.074834	0.02		1	2	0	1991	1996
Conventional (Clear Cell) Renal Cell Carcinoma	C0279702	PIM1	5292	P11309	Pim-1 proto-oncogene, serine/threonine kinase	Kinase	224	0.482	0.769	0.84846	0.02		1	2	0	2017	2018
Conventional (Clear Cell) Renal Cell Carcinoma	C0279702	PIK3R1	5295	P27986	phosphoinositide-3-kinase regulatory subunit 1	Kinase	285	0.477	0.885	0.99978	0.02		1	2	0	2015	2018
Conventional (Clear Cell) Renal Cell Carcinoma	C0279702	PLG	5340	P00747	plasminogen	Enzyme	586	0.389	0.923	0.010345	0.02		1	2	0	1996	2016
Conventional (Clear Cell) Renal Cell Carcinoma	C0279702	PML	5371	P29590	promyelocytic leukemia		274	0.477	0.846	0.21291	0.02		1	2	0	2014	2015
Conventional (Clear Cell) Renal Cell Carcinoma	C0279702	POLR2A	5430	P24928	RNA polymerase II subunit A	Enzyme	47	0.65	0.423	1	0.02		1	2	0	2010	2011
Conventional (Clear Cell) Renal Cell Carcinoma	C0279702	DLL4	54567	Q9NR61	delta like canonical Notch ligand 4		219	0.494	0.769	0.99982	0.02		1	2	0	2005	2014
Conventional (Clear Cell) Renal Cell Carcinoma	C0279702	POU5F1	5460	Q01860	POU class 5 homeobox 1		328	0.441	0.846	0.95371	0.02		1	2	0	2016	2019
Conventional (Clear Cell) Renal Cell Carcinoma	C0279702	PPIA	5478	P62937	peptidylprolyl isomerase A		180	0.51	0.769	0.55734	0.02		1	2	0	2007	2011
Conventional (Clear Cell) Renal Cell Carcinoma	C0279702	TRPM7	54822	Q96QT4	transient receptor potential cation channel subfamily M member 7	Ion channel	151	0.531	0.731	5.2086e-16	0.02		0.5	2	0	2018	2018
Conventional (Clear Cell) Renal Cell Carcinoma	C0279702	CEP55	55165	Q53EZ4	centrosomal protein 55		134	0.534	0.731	1.964e-12	0.02		1	2	0	2019	2019
Conventional (Clear Cell) Renal Cell Carcinoma	C0279702	NAT10	55226	Q9H0A0	N-acetyltransferase 10		133	0.536	0.769	4.1206e-22	0.02		1	2	0	2014	2014
Conventional (Clear Cell) Renal Cell Carcinoma	C0279702	HIF1AN	55662	Q9NWT6	hypoxia inducible factor 1 subunit alpha inhibitor		38	0.656	0.462	0.073885	0.02		1	2	0	2004	2007
Conventional (Clear Cell) Renal Cell Carcinoma	C0279702	PRKCB	5579	P05771	protein kinase C beta	Kinase	317	0.453	0.885	1	0.02		1	2	0	2011	2016
Conventional (Clear Cell) Renal Cell Carcinoma	C0279702	KDM3A	55818	Q9Y4C1	lysine demethylase 3A	Epigenetic regulator	77	0.599	0.654	0.99999	0.02		1	2	0	2011	2018
Conventional (Clear Cell) Renal Cell Carcinoma	C0279702	SLC50A1	55974	Q9BRV3	solute carrier family 50 member 1	Transporter	36	0.686	0.538	0.0019259	0.02		1	2	0	2014	2018
Conventional (Clear Cell) Renal Cell Carcinoma	C0279702	MAPK7	5598	Q13164	mitogen-activated protein kinase 7	Kinase	127	0.553	0.654	0.0031023	0.02		1	2	0	2013	2017
Conventional (Clear Cell) Renal Cell Carcinoma	C0279702	MAP2K7	5609	O14733	mitogen-activated protein kinase kinase 7	Kinase	408	0.419	0.808	0.99552	0.02		1	2	0	2016	2018
Conventional (Clear Cell) Renal Cell Carcinoma	C0279702	RNF20	56254	Q5VTR2	ring finger protein 20		27	0.722	0.346	1.7545e-10	0.02		1	2	0	2017	2017
Conventional (Clear Cell) Renal Cell Carcinoma	C0279702	MUC13	56667	Q9H3R2	mucin 13, cell surface associated		54	0.633	0.5	0.0024356	0.02		1	2	0	2017	2017
Conventional (Clear Cell) Renal Cell Carcinoma	C0279702	RETN	56729	Q9HD89	resistin		302	0.454	0.808	0.036545	0.02		1	2	0	2017	2019
Conventional (Clear Cell) Renal Cell Carcinoma	C0279702	PSMB8	5696	P28062	proteasome 20S subunit beta 8		165	0.533	0.808	0.021795	0.02		1	2	0	2000	2003
Conventional (Clear Cell) Renal Cell Carcinoma	C0279702	PSMB9	5698	P28065	proteasome 20S subunit beta 9		167	0.514	0.808	0.0027499	0.02		1	2	0	1997	2003
Conventional (Clear Cell) Renal Cell Carcinoma	C0279702	TP73-AS1	57212		TP73 antisense RNA 1		65	0.599	0.577		0.02		1	2	0	2018	2019
Conventional (Clear Cell) Renal Cell Carcinoma	C0279702	MIR363	574031		microRNA 363		83	0.578	0.692		0.02		1	2	0	2016	2019
Conventional (Clear Cell) Renal Cell Carcinoma	C0279702	MIR452	574412		microRNA 452		49	0.633	0.5		0.02		1	2	0	2018	2018
Conventional (Clear Cell) Renal Cell Carcinoma	C0279702	MIR489	574442		microRNA 489		42	0.647	0.423		0.02		1	2	0	2014	2019
Conventional (Clear Cell) Renal Cell Carcinoma	C0279702	MIR490	574443		microRNA 490		68	0.588	0.538		0.02		1	2	0	2016	2018
Conventional (Clear Cell) Renal Cell Carcinoma	C0279702	MIR499A	574501		microRNA 499a		156	0.519	0.846		0.02		1	2	1	2014	2016
Conventional (Clear Cell) Renal Cell Carcinoma	C0279702	MIR509-1	574514		microRNA 509-1		29	0.7	0.462		0.02		1	2	0	2013	2015
Conventional (Clear Cell) Renal Cell Carcinoma	C0279702	KLHL1	57626	Q9NR64	kelch like family member 1		100	0.569	0.654	7.1907e-07	0.02		1	2	0	1999	2005
Conventional (Clear Cell) Renal Cell Carcinoma	C0279702	MUC3B	57876	Q9H195	mucin 3B, cell surface associated		41	0.666	0.462		0.02		1	2	0	2002	2003
Conventional (Clear Cell) Renal Cell Carcinoma	C0279702	PTPRG	5793	P23470	protein tyrosine phosphatase receptor type G	Enzyme	70	0.619	0.731	5.0736e-06	0.02		1	2	0	1991	1996
Conventional (Clear Cell) Renal Cell Carcinoma	C0279702	BAX	581	Q07812	BCL2 associated X, apoptosis regulator	Signaling	420	0.417	0.885	0.31746	0.02		1	2	0	1999	2017
Conventional (Clear Cell) Renal Cell Carcinoma	C0279702	CXCL16	58191	Q9H2A7	C-X-C motif chemokine ligand 16	Signaling	178	0.502	0.769	3.4546e-05	0.02		1	2	0	2008	2009
Conventional (Clear Cell) Renal Cell Carcinoma	C0279702	RAC1	5879	P63000	Rac family small GTPase 1	Enzyme modulator	415	0.429	0.962	0.76228	0.02		0.5	2	0	2000	2019
Conventional (Clear Cell) Renal Cell Carcinoma	C0279702	RAF1	5894	P04049	Raf-1 proto-oncogene, serine/threonine kinase	Kinase	470	0.418	0.885	0.85295	0.02		1	2	0	1989	1989
Conventional (Clear Cell) Renal Cell Carcinoma	C0279702	REG1A	5967	P05451	regenerating family member 1 alpha		264	0.467	0.846	1.3499e-05	0.02		1	2	0	1991	1996
Conventional (Clear Cell) Renal Cell Carcinoma	C0279702	BCL2L2	599	Q92843	BCL2 like 2	Signaling	66	0.599	0.615	0.46908	0.02		1	2	0	2015	2017
Conventional (Clear Cell) Renal Cell Carcinoma	C0279702	RNASE3	6037	P12724	ribonuclease A family member 3		207	0.49	0.808		0.02		1	2	0	1989	1989
Conventional (Clear Cell) Renal Cell Carcinoma	C0279702	SAV1	60485	Q9H4B6	salvador family WW domain containing protein 1		42	0.659	0.5	0.00090373	0.02		1	2	0	2011	2017
Conventional (Clear Cell) Renal Cell Carcinoma	C0279702	RPL17	6139	P18621	ribosomal protein L17		104	0.559	0.731	0.92412	0.02		1	2	0	2016	2017
Conventional (Clear Cell) Renal Cell Carcinoma	C0279702	RPS6	6194	P62753	ribosomal protein S6	Nucleic acid binding	117	0.547	0.692	0.9759	0.02		1	2	0	2016	2016
Conventional (Clear Cell) Renal Cell Carcinoma	C0279702	MIR486-1	619554		microRNA 486-1		142	0.521	0.808		0.02		1	2	0	2019	2019
Conventional (Clear Cell) Renal Cell Carcinoma	C0279702	S100A4	6275	P26447	S100 calcium binding protein A4	Calcium-binding protein	308	0.448	0.769	0.0061838	0.02		1	2	0	2009	2012
Conventional (Clear Cell) Renal Cell Carcinoma	C0279702	S100A6	6277	P06703	S100 calcium binding protein A6	Calcium-binding protein	168	0.51	0.808	0.17565	0.02		1	2	0	2015	2015
Conventional (Clear Cell) Renal Cell Carcinoma	C0279702	S100A8	6279	P05109	S100 calcium binding protein A8	Calcium-binding protein	369	0.43	0.962	0.13761	0.02		1	2	0	2015	2019
Conventional (Clear Cell) Renal Cell Carcinoma	C0279702	S100A10	6281	P60903	S100 calcium binding protein A10	Calcium-binding protein	150	0.528	0.769	0.16843	0.02		1	2	0	2002	2019
Conventional (Clear Cell) Renal Cell Carcinoma	C0279702	S100A11	6282	P31949	S100 calcium binding protein A11	Calcium-binding protein	103	0.556	0.731	0.0084662	0.02		1	2	0	2017	2019
Conventional (Clear Cell) Renal Cell Carcinoma	C0279702	S100B	6285	P04271	S100 calcium binding protein B	Calcium-binding protein	599	0.383	0.923	0.04387	0.02		1	2	0	2014	2015
Conventional (Clear Cell) Renal Cell Carcinoma	C0279702	CCL18	6362	P55774	C-C motif chemokine ligand 18	Signaling	200	0.489	0.846	0.0091743	0.02		1	2	0	2017	2018
Conventional (Clear Cell) Renal Cell Carcinoma	C0279702	CCL21	6366	O00585	C-C motif chemokine ligand 21	Signaling	186	0.502	0.769	0.036239	0.02		1	2	0	2017	2017
Conventional (Clear Cell) Renal Cell Carcinoma	C0279702	SELE	6401	P16581	selectin E		327	0.447	0.808	7.9058e-10	0.02		1	2	0	1999	2009
Conventional (Clear Cell) Renal Cell Carcinoma	C0279702	SET	6418	Q01105	SET nuclear proto-oncogene	Enzyme modulator	183	0.507	0.808	0.99597	0.02		1	2	0	2013	2016
Conventional (Clear Cell) Renal Cell Carcinoma	C0279702	SFRP4	6424	Q6FHJ7	secreted frizzled related protein 4		155	0.524	0.654	9.2586e-05	0.02		1	2	2	2006	2009
Conventional (Clear Cell) Renal Cell Carcinoma	C0279702	CRNDE	643911		colorectal neoplasia differentially expressed		70	0.597	0.615		0.02		1	2	0	2017	2018
Conventional (Clear Cell) Renal Cell Carcinoma	C0279702	SH3BP2	6452	P78314	SH3 domain binding protein 2		65	0.623	0.654	1.156e-11	0.02		1	2	0	2004	2009
Conventional (Clear Cell) Renal Cell Carcinoma	C0279702	GORASP1	64689	Q9BQQ3	golgi reassembly stacking protein 1		369	0.428	0.846	0.019543	0.02		1	2	0	2011	2018
Conventional (Clear Cell) Renal Cell Carcinoma	C0279702	ST3GAL4	6484	Q11206	ST3 beta-galactoside alpha-2,3-sialyltransferase 4		115	0.588	0.692	0.039802	0.02		1	2	0	2003	2018
Conventional (Clear Cell) Renal Cell Carcinoma	C0279702	BMP2	650	P12643	bone morphogenetic protein 2	Signaling	428	0.432	0.846	0.98799	0.02		1	2	0	2012	2015
Conventional (Clear Cell) Renal Cell Carcinoma	C0279702	MARCKSL1	65108	P49006	MARCKS like 1		169	0.508	0.731	0.014253	0.02		1	2	0	1996	1998
Conventional (Clear Cell) Renal Cell Carcinoma	C0279702	FRTS1	65211		Fanconi renotubular syndrome		69	0.599	0.654		0.02		1	2	0	2016	2017
Conventional (Clear Cell) Renal Cell Carcinoma	C0279702	SLC5A2	6524	P31639	solute carrier family 5 member 2	Transporter	214	0.499	0.769	4.9184e-14	0.02		1	2	0	2017	2019
Conventional (Clear Cell) Renal Cell Carcinoma	C0279702	SLC6A3	6531	Q01959	solute carrier family 6 member 3	Transporter	373	0.453	0.885	0.99758	0.02		1	2	0	2016	2017
Conventional (Clear Cell) Renal Cell Carcinoma	C0279702	SLC12A3	6559	P55017	solute carrier family 12 member 3	Transporter	252	0.493	0.808	3.0324e-32	0.02		1	2	0	2018	2018
Conventional (Clear Cell) Renal Cell Carcinoma	C0279702	SLC15A1	6564	P46059	solute carrier family 15 member 1	Transporter	31	0.7	0.615	4.9948e-13	0.02		1	2	0	2008	2015
Conventional (Clear Cell) Renal Cell Carcinoma	C0279702	SLC16A1	6566	P53985	solute carrier family 16 member 1	Transporter	195	0.499	0.846	0.00073565	0.02		1	2	0	2018	2018
Conventional (Clear Cell) Renal Cell Carcinoma	C0279702	SLPI	6590	P03973	secretory leukocyte peptidase inhibitor	Enzyme modulator	310	0.449	0.846	0.00089665	0.02		1	2	0	2014	2014
Conventional (Clear Cell) Renal Cell Carcinoma	C0279702	SMN1	6606	Q16637	survival of motor neuron 1, telomeric	Epigenetic regulator	317	0.454	0.769	0.015829	0.02		1	2	0	2017	2018
Conventional (Clear Cell) Renal Cell Carcinoma	C0279702	SMN2	6607	Q16637	survival of motor neuron 2, centromeric		299	0.459	0.769	0.10337	0.02		1	2	0	2017	2018
Conventional (Clear Cell) Renal Cell Carcinoma	C0279702	SNCA	6622	P37840	synuclein alpha	Transporter	449	0.427	0.885	0.8829	0.02		1	2	0	2016	2017
Conventional (Clear Cell) Renal Cell Carcinoma	C0279702	FSCN1	6624	Q16658	fascin actin-bundling protein 1	Cellular structure	175	0.504	0.731	0.86852	0.02		1	2	0	2006	2018
Conventional (Clear Cell) Renal Cell Carcinoma	C0279702	SOX9	6662	P48436	SRY-box transcription factor 9		466	0.419	0.846	0.99772	0.02		1	2	0	2017	2017
Conventional (Clear Cell) Renal Cell Carcinoma	C0279702	SPAG4	6676	Q9NPE6	sperm associated antigen 4	Cellular structure	19	0.76	0.154	2.7163e-07	0.02		1	2	0	2013	2014
Conventional (Clear Cell) Renal Cell Carcinoma	C0279702	SPARC	6678	P09486	secreted protein acidic and cysteine rich	Signaling	344	0.445	0.846	0.89148	0.02		1	2	0	2001	2012
Conventional (Clear Cell) Renal Cell Carcinoma	C0279702	SREBF1	6720	P36956	sterol regulatory element binding transcription factor 1		159	0.518	0.808	0.014708	0.02		1	2	0	2018	2018
Conventional (Clear Cell) Renal Cell Carcinoma	C0279702	ST14	6768	Q9Y5Y6	suppression of tumorigenicity 14	Enzyme	170	0.514	0.769	0.56042	0.02		1	2	0	2004	2015
Conventional (Clear Cell) Renal Cell Carcinoma	C0279702	STAT1	6772	P42224	signal transducer and activator of transcription 1	Nucleic acid binding	531	0.399	0.885	0.99999	0.02		1	2	0	2014	2014
Conventional (Clear Cell) Renal Cell Carcinoma	C0279702	STC1	6781	P52823	stanniocalcin 1	Signaling	137	0.532	0.731	0.20364	0.02		1	2	0	2015	2018
Conventional (Clear Cell) Renal Cell Carcinoma	C0279702	STK3	6788	Q13188	serine/threonine kinase 3	Kinase	44	0.666	0.5	6.2043e-07	0.02		1	2	0	2014	2017
Conventional (Clear Cell) Renal Cell Carcinoma	C0279702	BST2	684	Q10589	bone marrow stromal cell antigen 2		95	0.57	0.769	0.00042516	0.02		1	2	0	2008	2017
Conventional (Clear Cell) Renal Cell Carcinoma	C0279702	SYT1	6857	P21579	synaptotagmin 1	Transporter	460	0.412	0.846	0.60038	0.02		1	2	0	2011	2018
Conventional (Clear Cell) Renal Cell Carcinoma	C0279702	ADAM17	6868	P78536	ADAM metallopeptidase domain 17		316	0.453	0.808	0.99528	0.02		1	2	0	2013	2017
Conventional (Clear Cell) Renal Cell Carcinoma	C0279702	MAP3K7	6885	O43318	mitogen-activated protein kinase kinase kinase 7	Kinase	273	0.477	0.808	0.99971	0.02		1	2	0	2013	2014
Conventional (Clear Cell) Renal Cell Carcinoma	C0279702	TAP2	6891	Q03519	transporter 2, ATP binding cassette subfamily B member	Transporter	155	0.517	0.808	6.8911e-11	0.02		1	2	0	2000	2003
Conventional (Clear Cell) Renal Cell Carcinoma	C0279702	TAZ	6901	Q16635	tafazzin	Enzyme	252	0.477	0.808	0.72591	0.02		1	2	0	2019	2019
Conventional (Clear Cell) Renal Cell Carcinoma	C0279702	ELOB	6923	Q15370	elongin B	Transcription factor	19	0.736	0.462	0.091842	0.02		1	2	0	1999	2014
Conventional (Clear Cell) Renal Cell Carcinoma	C0279702	MIR411	693121		microRNA 411		50	0.628	0.538		0.02		1	2	0	2017	2019
Conventional (Clear Cell) Renal Cell Carcinoma	C0279702	MIR625	693210		microRNA 625		64	0.604	0.654		0.02		1	2	0	2019	2019
Conventional (Clear Cell) Renal Cell Carcinoma	C0279702	MIR630	693215		microRNA 630		52	0.621	0.5		0.02		1	2	0	2014	2019
Conventional (Clear Cell) Renal Cell Carcinoma	C0279702	ZEB1	6935	P37275	zinc finger E-box binding homeobox 1	Transcription factor	310	0.442	0.808	0.96665	0.02		1	2	0	2019	2019
Conventional (Clear Cell) Renal Cell Carcinoma	C0279702	TRBV20OR9-2	6962		T cell receptor beta variable 20/OR9-2 (non-functional)		456	0.403	0.923		0.02		1	2	0	1999	2010
Conventional (Clear Cell) Renal Cell Carcinoma	C0279702	TFRC	7037	P02786	transferrin receptor	Enzyme	359	0.437	0.885	6.9902e-05	0.02		1	2	0	1994	2017
Conventional (Clear Cell) Renal Cell Carcinoma	C0279702	TGFBR3	7049	Q03167	transforming growth factor beta receptor 3		117	0.55	0.808	0.0030577	0.02		1	2	0	2010	2018
Conventional (Clear Cell) Renal Cell Carcinoma	C0279702	THBS1	7057	P07996	thrombospondin 1		480	0.407	0.885	0.99985	0.02		1	2	0	2007	2012
Conventional (Clear Cell) Renal Cell Carcinoma	C0279702	C1QBP	708	Q07021	complement C1q binding protein		111	0.569	0.692	2.0164e-07	0.02		1	2	0	2017	2017
Conventional (Clear Cell) Renal Cell Carcinoma	C0279702	TOP2A	7153	P11388	DNA topoisomerase II alpha		200	0.497	0.731	0.99086	0.02		1	2	0	2017	2019
Conventional (Clear Cell) Renal Cell Carcinoma	C0279702	TP73	7161	O15350	tumor protein p73	Transcription factor	300	0.449	0.808	0.99696	0.02		1	2	0	1998	2004
Conventional (Clear Cell) Renal Cell Carcinoma	C0279702	TPM3	7170	P06753	tropomyosin 3	Cellular structure	297	0.49	0.808	0.0066522	0.02		1	2	0	2018	2019
Conventional (Clear Cell) Renal Cell Carcinoma	C0279702	NR2C2	7182	P49116	nuclear receptor subfamily 2 group C member 2	Nuclear receptor	131	0.534	0.808	0.99892	0.02		1	2	0	2013	2018
Conventional (Clear Cell) Renal Cell Carcinoma	C0279702	TRPC6	7225	Q9Y210	transient receptor potential cation channel subfamily C member 6	Ion channel	166	0.514	0.692	3.0274e-07	0.02		1	2	0	2013	2019
Conventional (Clear Cell) Renal Cell Carcinoma	C0279702	MIR663A	724033		microRNA 663a		81	0.576	0.769		0.02		1	2	0	2018	2019
Conventional (Clear Cell) Renal Cell Carcinoma	C0279702	UCHL1	7345	P09936	ubiquitin C-terminal hydrolase L1	Enzyme	260	0.482	0.885	0.99095	0.02		1	2	0	2008	2009
Conventional (Clear Cell) Renal Cell Carcinoma	C0279702	DDR1	780	Q08345	discoidin domain receptor tyrosine kinase 1	Kinase	195	0.497	0.808	4.6331e-06	0.02		1	2	0	2017	2019
Conventional (Clear Cell) Renal Cell Carcinoma	C0279702	BTG2	7832	P78543	BTG anti-proliferation factor 2		77	0.587	0.538	0.019033	0.02		1	2	0	2004	2016
Conventional (Clear Cell) Renal Cell Carcinoma	C0279702	FTO	79068	Q9C0B1	FTO alpha-ketoglutarate dependent dioxygenase		286	0.486	0.885	8.364e-08	0.02		1	2	0	2019	2019
Conventional (Clear Cell) Renal Cell Carcinoma	C0279702	FSD1	79187	Q9BTV5	fibronectin type III and SPRY domain containing 1		220	0.486	0.808	0.25199	0.02		1	2	0	2015	2018
Conventional (Clear Cell) Renal Cell Carcinoma	C0279702	BHLHE41	79365	Q9C0J9	basic helix-loop-helix family member e41	Transcription factor	63	0.623	0.577	0.99212	0.02		1	2	0	2016	2019
Conventional (Clear Cell) Renal Cell Carcinoma	C0279702	HMGN5	79366	P82970	high mobility group nucleosome binding domain 5		42	0.65	0.423	0.30957	0.02		1	2	0	2012	2018
Conventional (Clear Cell) Renal Cell Carcinoma	C0279702	LAP	7939		Laryngeal adductor paralysis		50	0.619	0.731		0.02		1	2	0	2018	2018
Conventional (Clear Cell) Renal Cell Carcinoma	C0279702	WLS	79971	Q5T9L3	Wnt ligand secretion mediator		166	0.513	0.731	0.020463	0.02		1	2	0	1996	1998
Conventional (Clear Cell) Renal Cell Carcinoma	C0279702	GRHL2	79977	Q6ISB3	grainyhead like transcription factor 2	Transcription factor	85	0.59	0.731	0.99683	0.02		1	2	0	2014	2017
Conventional (Clear Cell) Renal Cell Carcinoma	C0279702	ESRP2	80004	Q9H6T0	epithelial splicing regulatory protein 2	Nucleic acid binding	19	0.76	0.346	2.3333e-07	0.02		1	2	0	2016	2018
Conventional (Clear Cell) Renal Cell Carcinoma	C0279702	ASRGL1	80150	Q7L266	asparaginase and isoaspartyl peptidase 1	Enzyme	205	0.494	0.808	2.7632e-05	0.02		1	2	0	2014	2014
Conventional (Clear Cell) Renal Cell Carcinoma	C0279702	PPP1R2C	80316	O14990	PPP1R2C family member C	Enzyme modulator	231	0.478	0.846		0.02		1	2	0	2018	2019
Conventional (Clear Cell) Renal Cell Carcinoma	C0279702	WNT10A	80326	Q9GZT5	Wnt family member 10A	Signaling	136	0.547	0.731	4.1667e-09	0.02		1	2	0	2012	2019
Conventional (Clear Cell) Renal Cell Carcinoma	C0279702	CD276	80381	Q5ZPR3	CD276 molecule	Enzyme modulator	169	0.505	0.731	2.4699e-09	0.02		1	2	0	2017	2019
Conventional (Clear Cell) Renal Cell Carcinoma	C0279702	CALR	811	P27797	calreticulin	Calcium-binding protein	487	0.413	0.923	0.89133	0.02		1	2	0	2017	2018
Conventional (Clear Cell) Renal Cell Carcinoma	C0279702	SLC7A5	8140	Q01650	solute carrier family 7 member 5	Transporter	173	0.513	0.808	0.23505	0.02		1	2	0	2013	2019
Conventional (Clear Cell) Renal Cell Carcinoma	C0279702	KDM5D	8284	Q9BY66	lysine demethylase 5D	Transcription factor	26	0.7	0.423	0.92793	0.02		1	2	0	2011	2017
Conventional (Clear Cell) Renal Cell Carcinoma	C0279702	SOX7	83595	Q9BT81	SRY-box transcription factor 7	Transcription factor	75	0.599	0.577	3.4831e-07	0.02		1	2	0	2018	2019
Conventional (Clear Cell) Renal Cell Carcinoma	C0279702	FSD1L	83856	Q9BXM9	fibronectin type III and SPRY domain containing 1 like		216	0.488	0.808	0.23386	0.02		1	2	0	2015	2018
Conventional (Clear Cell) Renal Cell Carcinoma	C0279702	KAT8	84148	Q9H7Z6	lysine acetyltransferase 8		80	0.592	0.654	0.22493	0.02		1	2	0	2013	2014
Conventional (Clear Cell) Renal Cell Carcinoma	C0279702	CASP9	842	P55211	caspase 9	Enzyme	293	0.458	0.808	7.3826e-06	0.02		1	2	0	2013	2013
Conventional (Clear Cell) Renal Cell Carcinoma	C0279702	ACCS	84680	Q96QU6	1-aminocyclopropane-1-carboxylate synthase homolog (inactive)	Enzyme	161	0.522	0.731	8.9836e-07	0.02		1	2	0	1997	2018
Conventional (Clear Cell) Renal Cell Carcinoma	C0279702	RIOX2	84864	Q8IUF8	ribosomal oxygenase 2		68	0.612	0.538	2.2584e-08	0.02		1	2	0	2007	2017
Conventional (Clear Cell) Renal Cell Carcinoma	C0279702	RGS5	8490	O15539	regulator of G protein signaling 5	Enzyme modulator	52	0.647	0.423	0.00053488	0.02		1	2	0	2000	2004
Conventional (Clear Cell) Renal Cell Carcinoma	C0279702	PPM1D	8493	O15297	protein phosphatase, Mg2+/Mn2+ dependent 1D	Enzyme	177	0.513	0.808	2.2321e-11	0.02		1	2	0	2014	2015
Conventional (Clear Cell) Renal Cell Carcinoma	C0279702	NUDCD1	84955	Q96RS6	NudC domain containing 1		26	0.705	0.308	2.6721e-11	0.02		1	2	0	2018	2018
Conventional (Clear Cell) Renal Cell Carcinoma	C0279702	SNHG12	85028	Q9BXW3	small nucleolar RNA host gene 12		50	0.628	0.538		0.02		1	2	0	2019	2019
Conventional (Clear Cell) Renal Cell Carcinoma	C0279702	BHLHE40	8553	O14503	basic helix-loop-helix family member e40	Transcription factor	113	0.544	0.731	0.99444	0.02		1	2	0	2001	2015
Conventional (Clear Cell) Renal Cell Carcinoma	C0279702	RUNX1	861	Q01196	RUNX family transcription factor 1	Transcription factor	412	0.425	0.808	0.65377	0.02		1	2	0	2014	2019
Conventional (Clear Cell) Renal Cell Carcinoma	C0279702	EIF3D	8664	O15371	eukaryotic translation initiation factor 3 subunit D	Nucleic acid binding	41	0.653	0.346	0.99983	0.02		1	2	0	2016	2019
Conventional (Clear Cell) Renal Cell Carcinoma	C0279702	RIPK1	8737	Q13546	receptor interacting serine/threonine kinase 1	Kinase	250	0.479	0.769	0.0079441	0.02		1	2	0	2016	2019
Conventional (Clear Cell) Renal Cell Carcinoma	C0279702	TNFRSF10A	8797	O00220	TNF receptor superfamily member 10a		155	0.521	0.731	5.0697e-15	0.02		1	2	0	2000	2017
Conventional (Clear Cell) Renal Cell Carcinoma	C0279702	NRP2	8828	O60462	neuropilin 2		144	0.539	0.615	0.00080686	0.02		1	2	0	2013	2015
Conventional (Clear Cell) Renal Cell Carcinoma	C0279702	NRP1	8829	O14786	neuropilin 1		246	0.476	0.808	0.98584	0.02		1	2	0	2008	2018
Conventional (Clear Cell) Renal Cell Carcinoma	C0279702	CFLAR	8837	O15519	CASP8 and FADD like apoptosis regulator	Enzyme	215	0.485	0.846	0.99967	0.02		1	2	0	2016	2019
Conventional (Clear Cell) Renal Cell Carcinoma	C0279702	NR1I2	8856	O75469	nuclear receptor subfamily 1 group I member 2	Nuclear receptor	462	0.418	0.846	7.2668e-09	0.02		1	2	0	2013	2019
Conventional (Clear Cell) Renal Cell Carcinoma	C0279702	CCNB1	891	P14635	cyclin B1	Enzyme modulator	155	0.512	0.731	0.15993	0.02		1	2	0	2011	2017
Conventional (Clear Cell) Renal Cell Carcinoma	C0279702	WNT3A	89780	P56704	Wnt family member 3A	Signaling	141	0.532	0.769	0.96491	0.02		1	2	0	2013	2019
Conventional (Clear Cell) Renal Cell Carcinoma	C0279702	HSPB3	8988	Q12988	heat shock protein family B (small) member 3		327	0.448	0.769	6.0944e-05	0.02		1	2	0	2011	2014
Conventional (Clear Cell) Renal Cell Carcinoma	C0279702	SPAG9	9043	O60271	sperm associated antigen 9	Enzyme modulator	98	0.566	0.769	1	0.02		1	2	0	2008	2016
Conventional (Clear Cell) Renal Cell Carcinoma	C0279702	CLDN8	9073	P56748	claudin 8	Cell-cell junction	30	0.674	0.5	0.016193	0.02		1	2	0	2006	2011
Conventional (Clear Cell) Renal Cell Carcinoma	C0279702	COL23A1	91522	Q86Y22	collagen type XXIII alpha 1 chain		11	0.792	0.154	6.6455e-13	0.02		1	2	0	2017	2018
Conventional (Clear Cell) Renal Cell Carcinoma	C0279702	EBAG9	9166	O00559	estrogen receptor binding site associated antigen 9		69	0.615	0.462	0.077101	0.02		1	2	0	2005	2009
Conventional (Clear Cell) Renal Cell Carcinoma	C0279702	DCLK1	9201	O15075	doublecortin like kinase 1	Kinase	123	0.545	0.615	0.99964	0.02		1	2	0	2015	2018
Conventional (Clear Cell) Renal Cell Carcinoma	C0279702	AURKB	9212	Q96GD4	aurora kinase B	Kinase	161	0.51	0.769	0.0044521	0.02		1	2	0	2019	2019
Conventional (Clear Cell) Renal Cell Carcinoma	C0279702	MAGI1	9223	Q96QZ7	membrane associated guanylate kinase, WW and PDZ domain containing 1		66	0.628	0.615	0.5597	0.02		1	2	0	2018	2019
Conventional (Clear Cell) Renal Cell Carcinoma	C0279702	PTTG1	9232	O95997	PTTG1 regulator of sister chromatid separation, securin		140	0.526	0.654	0.00042161	0.02		1	2	0	2012	2019
Conventional (Clear Cell) Renal Cell Carcinoma	C0279702	CRB3	92359	Q9BUF7	crumbs cell polarity complex component 3		24	0.716	0.308	0.35784	0.02		1	2	0	2015	2019
Conventional (Clear Cell) Renal Cell Carcinoma	C0279702	PIWIL1	9271	Q96J94	piwi like RNA-mediated gene silencing 1		99	0.57	0.731	7.2798e-14	0.02		1	2	0	2008	2019
Conventional (Clear Cell) Renal Cell Carcinoma	C0279702	KLF4	9314	O43474	Kruppel like factor 4	Nucleic acid binding	307	0.449	0.769	0.99714	0.02		1	2	0	2013	2013
Conventional (Clear Cell) Renal Cell Carcinoma	C0279702	SLIT2	9353	O94813	slit guidance ligand 2		177	0.511	0.769	1	0.02		0.5	2	0	2003	2004
Conventional (Clear Cell) Renal Cell Carcinoma	C0279702	KL	9365	Q9UEF7	klotho	Enzyme	332	0.448	0.769	0.00022444	0.02		1	2	0	2018	2018
Conventional (Clear Cell) Renal Cell Carcinoma	C0279702	ACVRL1	94	P37023	activin A receptor like type 1	Kinase	224	0.493	0.769	0.00096719	0.02		1	2	0	2017	2019
Conventional (Clear Cell) Renal Cell Carcinoma	C0279702	QKI	9444	Q96PU8	QKI, KH domain containing RNA binding	Nucleic acid binding	61	0.617	0.5	0.75121	0.02		1	2	0	2016	2019
Conventional (Clear Cell) Renal Cell Carcinoma	C0279702	AIM2	9447	O14862	absent in melanoma 2		167	0.521	0.769	2.1942e-09	0.02		1	2	0	2018	2018
Conventional (Clear Cell) Renal Cell Carcinoma	C0279702	GAL3ST1	9514	Q99999	galactose-3-O-sulfotransferase 1		61	0.621	0.731	0.66559	0.02		1	2	0	1998	2019
Conventional (Clear Cell) Renal Cell Carcinoma	C0279702	CD40	958	P25942	CD40 molecule		528	0.396	0.846	0.84603	0.02		1	2	0	1997	2014
Conventional (Clear Cell) Renal Cell Carcinoma	C0279702	CD40LG	959	P29965	CD40 ligand	Signaling	453	0.414	0.846	0.72079	0.02		1	2	0	2002	2013
Conventional (Clear Cell) Renal Cell Carcinoma	C0279702	CD47	961	Q08722	CD47 molecule		253	0.468	0.769	0.91924	0.02		1	2	0	1997	2017
Conventional (Clear Cell) Renal Cell Carcinoma	C0279702	FNIP1	96459	Q8TF40	folliculin interacting protein 1		24	0.743	0.346	0.99957	0.02		1	2	0	2008	2018
Conventional (Clear Cell) Renal Cell Carcinoma	C0279702	PCLAF	9768	Q15004	PCNA clamp associated factor		125	0.538	0.769	0.16276	0.02		1	2	0	2014	2016
Conventional (Clear Cell) Renal Cell Carcinoma	C0279702	CD151	977	P48509	CD151 molecule (Raph blood group)		101	0.564	0.654	1.0841e-05	0.02		1	2	0	2018	2018
Conventional (Clear Cell) Renal Cell Carcinoma	C0279702	MAML1	9794	Q92585	mastermind like transcriptional coactivator 1	Transcription factor	38	0.67	0.423	0.99995	0.02		1	2	0	2012	2016
Conventional (Clear Cell) Renal Cell Carcinoma	C0279702	SPATA2	9825	Q9UM82	spermatogenesis associated 2		107	0.556	0.615	0.97889	0.02		1	2	0	2016	2017
Conventional (Clear Cell) Renal Cell Carcinoma	C0279702	CDC20	991	Q12834	cell division cycle 20	Enzyme modulator	86	0.587	0.577	3.0001e-07	0.02		1	2	0	2015	2018
Conventional (Clear Cell) Renal Cell Carcinoma	C0279702	DLEC1	9940	Q9Y238	DLEC1 cilia and flagella associated protein		94	0.572	0.615	2.1303e-35	0.02		1	2	0	2009	2010
Conventional (Clear Cell) Renal Cell Carcinoma	C0279702	SCO2	9997	O43819	synthesis of cytochrome C oxidase 2	Enzyme	294	0.479	0.846	7.5473e-07	0.02		1	2	0	2017	2018
Conventional (Clear Cell) Renal Cell Carcinoma	C0279702	NAT2	10	P11245	N-acetyltransferase 2	Enzyme	311	0.451	0.885	3.2744e-06	0.01		1	1	0	1999	1999
Conventional (Clear Cell) Renal Cell Carcinoma	C0279702	ADA	100	P00813	adenosine deaminase	Enzyme	379	0.44	0.885	2.8825e-12	0.01		1	1	0	2017	2017
Conventional (Clear Cell) Renal Cell Carcinoma	C0279702	CDH2	1000	P19022	cadherin 2		135	0.535	0.731	0.99171	0.01		1	1	0	2019	2019
Conventional (Clear Cell) Renal Cell Carcinoma	C0279702	CDKN2B-AS1	100048912		CDKN2B antisense RNA 1		213	0.491	0.769		0.01		1	1	0	2017	2017
Conventional (Clear Cell) Renal Cell Carcinoma	C0279702	SRA1	10011	Q9HD15	steroid receptor RNA activator 1		102	0.568	0.615	5.19e-06	0.01		1	1	0	2019	2019
Conventional (Clear Cell) Renal Cell Carcinoma	C0279702	MIR216B	100126319		microRNA 216b		53	0.621	0.577		0.01		1	1	0	2018	2018
Conventional (Clear Cell) Renal Cell Carcinoma	C0279702	MIR942	100126331		microRNA 942		26	0.695	0.5		0.01		1	1	0	2019	2019
Conventional (Clear Cell) Renal Cell Carcinoma	C0279702	MIR708	100126333		microRNA 708		86	0.57	0.692		0.01		1	1	0	2011	2011
Conventional (Clear Cell) Renal Cell Carcinoma	C0279702	MIR885	100126334		microRNA 885		70	0.597	0.615		0.01		1	1	0	2019	2019
Conventional (Clear Cell) Renal Cell Carcinoma	C0279702	EGOT	100126791		eosinophil granule ontogeny transcript		19	0.743	0.346		0.01		1	1	0	2017	2017
Conventional (Clear Cell) Renal Cell Carcinoma	C0279702	DNM1P35	100128285		dynamin 1 pseudogene 35		2	1	0.115		0.01		1	1	0	2018	2018
Conventional (Clear Cell) Renal Cell Carcinoma	C0279702	HDAC6	10013	Q9UBN7	histone deacetylase 6	Epigenetic regulator	288	0.465	0.846	1	0.01		1	1	0	2017	2017
Conventional (Clear Cell) Renal Cell Carcinoma	C0279702	LINC00887	100131551		long intergenic non-protein coding RNA 887		9	0.821	0.192		0.01		1	1	0	2017	2017
Conventional (Clear Cell) Renal Cell Carcinoma	C0279702	FILNC1	100132735		FOXO induced long non-coding RNA 1		7	0.861	0.115		0.01		1	1	0	2017	2017
Conventional (Clear Cell) Renal Cell Carcinoma	C0279702	TRAP	100187907		triiodothyronine receptor auxiliary protein		80	0.579	0.731		0.01		1	1	0	2015	2015
Conventional (Clear Cell) Renal Cell Carcinoma	C0279702	GNE	10020	Q9Y223	glucosamine (UDP-N-acetyl)-2-epimerase/N-acetylmannosamine kinase	Enzyme	118	0.61	0.692	2.4844e-16	0.01		1	1	0	2013	2013
Conventional (Clear Cell) Renal Cell Carcinoma	C0279702	CDH5	1003	P33151	cadherin 5		103	0.561	0.692	0.51314	0.01		1	1	0	2019	2019
Conventional (Clear Cell) Renal Cell Carcinoma	C0279702	MIR1294	100302181		microRNA 1294		22	0.716	0.308		0.01		1	1	0	2019	2019
Conventional (Clear Cell) Renal Cell Carcinoma	C0279702	MIR1291	100302221		microRNA 1291		23	0.722	0.308		0.01		1	1	0	2013	2013
Conventional (Clear Cell) Renal Cell Carcinoma	C0279702	MIR1236	100302242		microRNA 1236		29	0.686	0.423		0.01		1	1	0	2016	2016
Conventional (Clear Cell) Renal Cell Carcinoma	C0279702	MIR1290	100302276		microRNA 1290		62	0.61	0.615		0.01		1	1	0	2017	2017
Conventional (Clear Cell) Renal Cell Carcinoma	C0279702	FTX	100302692		FTX transcript, XIST regulator		17	0.743	0.346		0.01		1	1	0	2017	2017
Conventional (Clear Cell) Renal Cell Carcinoma	C0279702	MIR3133	100422942		microRNA 3133		1	1	0.115		0.01		1	1	0	2019	2019
Conventional (Clear Cell) Renal Cell Carcinoma	C0279702	MIR1260B	100422991		microRNA 1260b		21	0.711	0.423		0.01		1	1	0	2013	2013
Conventional (Clear Cell) Renal Cell Carcinoma	C0279702	LINC01094	100505702		long intergenic non-protein coding RNA 1094		5	1	0.115		0.01		1	1	0	2020	2020
Conventional (Clear Cell) Renal Cell Carcinoma	C0279702	OTUD6B-AS1	100506365		OTUD6B antisense RNA 1 (head to head)		4	0.931	0.154		0.01		1	1	0	2019	2019
Conventional (Clear Cell) Renal Cell Carcinoma	C0279702	LINC01234	100506465		long intergenic non-protein coding RNA 1234		29	0.7	0.346		0.01		1	1	0	2020	2020
Conventional (Clear Cell) Renal Cell Carcinoma	C0279702	OCLN	100506658	Q16625	occludin		195	0.507	0.846	8.5583e-07	0.01		1	1	0	2017	2017
Conventional (Clear Cell) Renal Cell Carcinoma	C0279702	THORLNC	100506797		testis associated oncogenic lncRNA		22	0.716	0.308		0.01		1	1	0	2018	2018
Conventional (Clear Cell) Renal Cell Carcinoma	C0279702	GIHCG	100506844		GIHCG inhibitor of miR-200b/200a/429 expression		18	0.736	0.231		0.01		1	1	0	2018	2018
Conventional (Clear Cell) Renal Cell Carcinoma	C0279702	MELTF-AS1	100507057		MELTF antisense RNA 1		7	0.861	0.192		0.01		1	1	0	2017	2017
Conventional (Clear Cell) Renal Cell Carcinoma	C0279702	ADAMTS9-AS2	100507098		ADAMTS9 antisense RNA 2		50	0.656	0.462		0.01		1	1	0	2019	2019
Conventional (Clear Cell) Renal Cell Carcinoma	C0279702	EGFR-AS1	100507500		EGFR antisense RNA 1		20	0.722	0.192		0.01		1	1	0	2019	2019
Conventional (Clear Cell) Renal Cell Carcinoma	C0279702	TRIM52-AS1	100507602		TRIM52 antisense RNA 1 (head to head)		3	0.931	0.115		0.01		1	1	0	2016	2016
Conventional (Clear Cell) Renal Cell Carcinoma	C0279702	LOC100507703	100507703		HLA class I histocompatibility antigen, A-69 alpha chain-like		4	0.89	0.115		0.01		1	1	0	1999	1999
Conventional (Clear Cell) Renal Cell Carcinoma	C0279702	ABCB6	10058	Q9NP58	ATP binding cassette subfamily B member 6 (Langereis blood group)	Transporter	400	0.431	0.885	8.5999e-19	0.01		1	1	0	2016	2016
Conventional (Clear Cell) Renal Cell Carcinoma	C0279702	CDH8	1006	P55286	cadherin 8		18	0.743	0.385	0.98806	0.01		1	1	0	2002	2002
Conventional (Clear Cell) Renal Cell Carcinoma	C0279702	SPRY4-IT1	100642175		SPRY4 intronic transcript 1		53	0.619	0.462		0.01		1	1	0	2014	2014
Conventional (Clear Cell) Renal Cell Carcinoma	C0279702	CDH9	1007	Q9ULB4	cadherin 9		17	0.751	0.308	0.83147	0.01		1	1	0	2007	2007
Conventional (Clear Cell) Renal Cell Carcinoma	C0279702	ADAM8	101	P78325	ADAM metallopeptidase domain 8	Enzyme	81	0.59	0.731	2.1983e-14	0.01		1	1	0	2004	2004
Conventional (Clear Cell) Renal Cell Carcinoma	C0279702	KIF20A	10112	O95235	kinesin family member 20A	Cellular structure	59	0.615	0.615	4.5339e-13	0.01		1	1	0	2019	2019
Conventional (Clear Cell) Renal Cell Carcinoma	C0279702	CDH13	1012	P55290	cadherin 13		205	0.501	0.846	0.0007058	0.01		1	1	0	1996	1996
Conventional (Clear Cell) Renal Cell Carcinoma	C0279702	ARL4C	10123	P56559	ADP ribosylation factor like GTPase 4C		42	0.656	0.308	0.76081	0.01		1	1	0	2019	2019
Conventional (Clear Cell) Renal Cell Carcinoma	C0279702	NPTN-IT1	101241892		NPTN intronic transcript 1		23	0.705	0.154		0.01		1	1	0	2019	2019
Conventional (Clear Cell) Renal Cell Carcinoma	C0279702	OPTN	10133	Q96CV9	optineurin		136	0.548	0.808	5.91e-18	0.01		1	1	0	2019	2019
Conventional (Clear Cell) Renal Cell Carcinoma	C0279702	NAMPT	10135	P43490	nicotinamide phosphoribosyltransferase	Signaling	199	0.502	0.808	0.97914	0.01		1	1	0	2017	2017
Conventional (Clear Cell) Renal Cell Carcinoma	C0279702	CDH16	1014	O75309	cadherin 16		16	0.76	0.154	3.6527e-25	0.01		0	1	0	2006	2006
Conventional (Clear Cell) Renal Cell Carcinoma	C0279702	EBI3	10148	Q14213	Epstein-Barr virus induced 3	Signaling	233	0.474	0.808	0.10797	0.01		1	1	0	2019	2019
Conventional (Clear Cell) Renal Cell Carcinoma	C0279702	MBNL2	10150	Q5VZF2	muscleblind like splicing regulator 2	Nucleic acid binding	29	0.716	0.577	0.25602	0.01		1	1	0	2018	2018
Conventional (Clear Cell) Renal Cell Carcinoma	C0279702	IATPR	101929447		ITGB1 adjacent tumor promoting lncRNA		23	0.722	0.269		0.01		1	1	0	2019	2019
Conventional (Clear Cell) Renal Cell Carcinoma	C0279702	TSHZ1	10194	Q6ZSZ6	teashirt zinc finger homeobox 1	Transcription factor	99	0.569	0.731	0.9973	0.01		1	1	0	2018	2018
Conventional (Clear Cell) Renal Cell Carcinoma	C0279702	CDK5	1020	Q00535	cyclin dependent kinase 5	Kinase	204	0.495	0.846	0.13892	0.01		1	1	0	2019	2019
Conventional (Clear Cell) Renal Cell Carcinoma	C0279702	CTDSPL	10217	O15194	CTD small phosphatase like		35	0.678	0.5	0.0026698	0.01		1	1	0	2014	2014
Conventional (Clear Cell) Renal Cell Carcinoma	C0279702	PLIN3	10226	O60664	perilipin 3	Transporter	14	0.736	0.423	1.179e-07	0.01		1	1	0	2018	2018
Conventional (Clear Cell) Renal Cell Carcinoma	C0279702	STX6	10228	O43752	syntaxin 6	Transporter	19	0.751	0.385	0.010265	0.01		1	1	0	2019	2019
Conventional (Clear Cell) Renal Cell Carcinoma	C0279702	SPRY2	10253	O43597	sprouty RTK signaling antagonist 2	Signaling	111	0.554	0.654	0.97126	0.01		1	1	0	2013	2013
Conventional (Clear Cell) Renal Cell Carcinoma	C0279702	STAG1	10274	Q8WVM7	stromal antigen 1	Nucleic acid binding	56	0.656	0.577	1	0.01		1	1	0	2001	2001
Conventional (Clear Cell) Renal Cell Carcinoma	C0279702	CDKN1C	1028	P49918	cyclin dependent kinase inhibitor 1C		298	0.456	0.846	0.81963	0.01		1	1	0	2019	2019
Conventional (Clear Cell) Renal Cell Carcinoma	C0279702	TPTEP2-CSNK1E	102800317	P49674	TPTEP2-CSNK1E readthrough		35	0.678	0.5		0.01		1	1	0	2018	2018
Conventional (Clear Cell) Renal Cell Carcinoma	C0279702	DLEU1	10301	O43261	deleted in lymphocytic leukemia 1		109	0.569	0.692	0.47033	0.01		1	1	0	2019	2019
Conventional (Clear Cell) Renal Cell Carcinoma	C0279702	TNIP1	10318	Q15025	TNFAIP3 interacting protein 1		93	0.564	0.769	0.47559	0.01		1	1	0	2019	2019
Conventional (Clear Cell) Renal Cell Carcinoma	C0279702	CNPY2	10330	Q9Y2B0	canopy FGF signaling regulator 2		35	0.691	0.385	0.0029232	0.01		1	1	0	2017	2017
Conventional (Clear Cell) Renal Cell Carcinoma	C0279702	CDO1	1036	Q16878	cysteine dioxygenase type 1		72	0.592	0.654	0.0096603	0.01		1	1	0	2015	2015
Conventional (Clear Cell) Renal Cell Carcinoma	C0279702	TUBB3	10381	Q13509	tubulin beta 3 class III	Cellular structure	259	0.486	0.808	2.5676e-10	0.01		1	1	0	2017	2017
Conventional (Clear Cell) Renal Cell Carcinoma	C0279702	MYL12B	103910	O14950;P19105	myosin light chain 12B	Calcium-binding protein	32	0.691	0.462	0.11325	0.01		1	1	0	2017	2017
Conventional (Clear Cell) Renal Cell Carcinoma	C0279702	NOD1	10392	Q9Y239	nucleotide binding oligomerization domain containing 1	Enzyme	136	0.541	0.769	2.4602e-18	0.01		1	1	0	2019	2019
Conventional (Clear Cell) Renal Cell Carcinoma	C0279702	MYL9	10398	P24844	myosin light chain 9	Calcium-binding protein	52	0.653	0.423	0.019797	0.01		1	1	0	2005	2005
Conventional (Clear Cell) Renal Cell Carcinoma	C0279702	RACK1	10399	P63244	receptor for activated C kinase 1		118	0.545	0.808	0.99836	0.01		1	1	0	2011	2011
Conventional (Clear Cell) Renal Cell Carcinoma	C0279702	NDC80	10403	O14777	NDC80 kinetochore complex component	Transcription factor	68	0.599	0.538	1.1423e-07	0.01		1	1	0	2019	2019
Conventional (Clear Cell) Renal Cell Carcinoma	C0279702	PRMT5	10419	O14744	protein arginine methyltransferase 5	Epigenetic regulator	131	0.539	0.769	0.99999	0.01		1	1	0	2018	2018
Conventional (Clear Cell) Renal Cell Carcinoma	C0279702	SNHG14	104472715		small nucleolar RNA host gene 14		44	0.656	0.577		0.01		1	1	0	2017	2017
Conventional (Clear Cell) Renal Cell Carcinoma	C0279702	IRAIN	104472848		IGF1R antisense imprinted non-protein coding RNA		36	0.656	0.5		0.01		1	1	0	2009	2009
Conventional (Clear Cell) Renal Cell Carcinoma	C0279702	GPNMB	10457	Q14956	glycoprotein nmb	Signaling	103	0.566	0.692	2.8803e-27	0.01		1	1	0	2019	2019
Conventional (Clear Cell) Renal Cell Carcinoma	C0279702	CEACAM5	1048	P06731	CEA cell adhesion molecule 5		428	0.42	0.846	4.1625e-10	0.01		1	1	0	2017	2017
Conventional (Clear Cell) Renal Cell Carcinoma	C0279702	NXF1	10482	Q9UBU9	nuclear RNA export factor 1	Nucleic acid binding	141	0.531	0.885	0.9763	0.01		1	1	0	2003	2003
Conventional (Clear Cell) Renal Cell Carcinoma	C0279702	RNASEH2A	10535	O75792	ribonuclease H2 subunit A	Enzyme	116	0.592	0.692	0.0041807	0.01		1	1	0	2018	2018
Conventional (Clear Cell) Renal Cell Carcinoma	C0279702	LINC01885	105373538		long intergenic non-protein coding RNA 1885		2	1	0.115		0.01		1	1	0	2020	2020
Conventional (Clear Cell) Renal Cell Carcinoma	C0279702	ANP32B	10541	Q92688	acidic nuclear phosphoprotein 32 family member B	Enzyme modulator	120	0.541	0.731	0.95827	0.01		1	1	0	2011	2011
Conventional (Clear Cell) Renal Cell Carcinoma	C0279702	NPC2	10577	P61916	NPC intracellular cholesterol transporter 2		81	0.612	0.769	0.0017755	0.01		1	1	0	2013	2013
Conventional (Clear Cell) Renal Cell Carcinoma	C0279702	AHSA1	10598	O95433	activator of HSP90 ATPase activity 1		526	0.396	0.923	0.99896	0.01		1	1	0	2013	2013
Conventional (Clear Cell) Renal Cell Carcinoma	C0279702	RBCK1	10616	Q9BYM8	RANBP2-type and C3HC4-type zinc finger containing 1	Enzyme	35	0.736	0.462	0.13497	0.01		1	1	0	2019	2019
Conventional (Clear Cell) Renal Cell Carcinoma	C0279702	CENPE	1062	Q02224	centromere protein E	Cellular structure	78	0.636	0.692	0.24146	0.01		1	1	0	2019	2019
Conventional (Clear Cell) Renal Cell Carcinoma	C0279702	MYL12A	10627	O14950;P19105	myosin light chain 12A	Calcium-binding protein	34	0.682	0.462	0.00051197	0.01		1	1	0	2017	2017
Conventional (Clear Cell) Renal Cell Carcinoma	C0279702	PDPN	10630	Q86YL7	podoplanin		256	0.47	0.769	0.00032048	0.01		1	1	0	2016	2016
Conventional (Clear Cell) Renal Cell Carcinoma	C0279702	NPRL2	10641	Q8WTW4	NPR2 like, GATOR1 complex subunit	Enzyme	45	0.644	0.462	0.38813	0.01		1	1	0	2014	2014
Conventional (Clear Cell) Renal Cell Carcinoma	C0279702	IGF2BP1	10642	Q9NZI8	insulin like growth factor 2 mRNA binding protein 1	Enzyme	106	0.56	0.692	0.99933	0.01		1	1	0	2015	2015
Conventional (Clear Cell) Renal Cell Carcinoma	C0279702	GNA13	10672	Q14344	G protein subunit alpha 13	Enzyme modulator	46	0.656	0.538	0.86735	0.01		1	1	0	2017	2017
Conventional (Clear Cell) Renal Cell Carcinoma	C0279702	TNFSF13B	10673	Q9Y275	TNF superfamily member 13b		282	0.46	0.731	0.98193	0.01		1	1	0	2011	2011
Conventional (Clear Cell) Renal Cell Carcinoma	C0279702	CETN1	1068	Q12798	centrin 1	Calcium-binding protein	82	0.584	0.654	0.21511	0.01		1	1	0	2002	2002
Conventional (Clear Cell) Renal Cell Carcinoma	C0279702	EBP	10682	Q15125	EBP cholestenol delta-isomerase	Enzyme	243	0.494	0.846	0.93645	0.01		1	1	0	2017	2017
Conventional (Clear Cell) Renal Cell Carcinoma	C0279702	USP39	10713	Q53GS9	ubiquitin specific peptidase 39	Enzyme	39	0.656	0.385	0.01038	0.01		1	1	0	2018	2018
Conventional (Clear Cell) Renal Cell Carcinoma	C0279702	HSPH1	10808	Q92598	heat shock protein family H (Hsp110) member 1		48	0.65	0.538	0.99822	0.01		1	1	0	2007	2007
Conventional (Clear Cell) Renal Cell Carcinoma	C0279702	ADAM28	10863	Q9UKQ2	ADAM metallopeptidase domain 28	Enzyme	41	0.666	0.5	2.9634e-24	0.01		1	1	0	2012	2012
Conventional (Clear Cell) Renal Cell Carcinoma	C0279702	FGL2	10875	Q14314	fibrinogen like 2	Signaling	63	0.621	0.615	6.1472e-05	0.01		1	1	0	2017	2017
Conventional (Clear Cell) Renal Cell Carcinoma	C0279702	DHRS4	10901	Q9BTZ2	dehydrogenase/reductase 4		5	0.931	0.115	1.0222e-05	0.01		1	1	0	2018	2018
Conventional (Clear Cell) Renal Cell Carcinoma	C0279702	GADD45G	10912	O95257	growth arrest and DNA damage inducible gamma		87	0.601	0.769	0.55259	0.01		1	1	0	2011	2011
Conventional (Clear Cell) Renal Cell Carcinoma	C0279702	PRDX3	10935	P30048	peroxiredoxin 3	Enzyme	89	0.568	0.769	0.0042426	0.01		1	1	0	2014	2014
Conventional (Clear Cell) Renal Cell Carcinoma	C0279702	STIP1	10963	P31948	stress induced phosphoprotein 1		85	0.578	0.692	0.99987	0.01		1	1	0	2017	2017
Conventional (Clear Cell) Renal Cell Carcinoma	C0279702	CKAP4	10970	Q07065	cytoskeleton associated protein 4		332	0.436	0.731	0.50863	0.01		1	1	0	2017	2017
Conventional (Clear Cell) Renal Cell Carcinoma	C0279702	LNCSRLR	109729161		lncRNA sorafenib resistance in renal cell carcinoma associated		2	0.931	0.115		0.01		1	1	0	2017	2017
Conventional (Clear Cell) Renal Cell Carcinoma	C0279702	COPS5	10987	Q92905	COP9 signalosome subunit 5	Enzyme	101	0.566	0.769	0.99925	0.01		1	1	0	2017	2017
Conventional (Clear Cell) Renal Cell Carcinoma	C0279702	SLC27A4	10999	Q6P1M0	solute carrier family 27 member 4	Transporter	72	0.608	0.769	4.4885e-05	0.01		1	1	0	2019	2019
Conventional (Clear Cell) Renal Cell Carcinoma	C0279702	IL24	11009	Q13007	interleukin 24		202	0.498	0.769	5.8826e-07	0.01		1	1	0	2003	2003
Conventional (Clear Cell) Renal Cell Carcinoma	C0279702	KLK11	11012	Q9UBX7	kallikrein related peptidase 11	Enzyme	49	0.641	0.5	0.00075409	0.01		1	1	0	2006	2006
Conventional (Clear Cell) Renal Cell Carcinoma	C0279702	RCC1	1104	P18754	regulator of chromosome condensation 1		34	0.686	0.538	0.93109	0.01		1	1	0	2013	2013
Conventional (Clear Cell) Renal Cell Carcinoma	C0279702	TPPP	11076	O94811	tubulin polymerization promoting protein	Cellular structure	110	0.57	0.692	0.20334	0.01		1	1	0	1996	1996
Conventional (Clear Cell) Renal Cell Carcinoma	C0279702	MNS16A	110806265		MNS16A minisatellite promoter		35	0.663	0.5		0.01		1	1	0	2016	2016
Conventional (Clear Cell) Renal Cell Carcinoma	C0279702	HNRNPUL1	11100	Q9BUJ2	heterogeneous nuclear ribonucleoprotein U like 1		8	0.821	0.269	0.99999	0.01		1	1	0	2013	2013
Conventional (Clear Cell) Renal Cell Carcinoma	C0279702	CHEK1	1111	O14757	checkpoint kinase 1	Kinase	195	0.492	0.808	3.14e-08	0.01		0	1	0	2015	2015
Conventional (Clear Cell) Renal Cell Carcinoma	C0279702	PTPRT	11122	O14522	protein tyrosine phosphatase receptor type T	Enzyme	53	0.636	0.538	1	0.01		1	1	0	1993	1993
Conventional (Clear Cell) Renal Cell Carcinoma	C0279702	KIF3A	11127	Q9Y496	kinesin family member 3A	Cellular structure	64	0.612	0.615	0.89775	0.01		1	1	0	2016	2016
Conventional (Clear Cell) Renal Cell Carcinoma	C0279702	TBC1D8	11138	O95759	TBC1 domain family member 8	Enzyme	23	0.76	0.346	5.5998e-13	0.01		1	1	0	2002	2002
Conventional (Clear Cell) Renal Cell Carcinoma	C0279702	CORO1A	11151	P31146	coronin 1A	Cellular structure	102	0.564	0.692	0.97024	0.01		1	1	0	2019	2019
Conventional (Clear Cell) Renal Cell Carcinoma	C0279702	WDR45	11152	Q9Y484	WD repeat domain 45		72	0.647	0.423	0.99145	0.01		1	1	0	2015	2015
Conventional (Clear Cell) Renal Cell Carcinoma	C0279702	NUDT5	11164	Q9UKK9	nudix hydrolase 5	Enzyme	12	0.821	0.231	0.001405	0.01		1	1	0	2017	2017
Conventional (Clear Cell) Renal Cell Carcinoma	C0279702	PSIP1	11168	O75475	PC4 and SFRS1 interacting protein 1	Signaling	210	0.49	0.846	0.99668	0.01		1	1	0	2018	2018
Conventional (Clear Cell) Renal Cell Carcinoma	C0279702	CHI3L2	1117	Q15782	chitinase 3 like 2		14	0.78	0.308	1.9866e-14	0.01		1	1	0	2019	2019
Conventional (Clear Cell) Renal Cell Carcinoma	C0279702	BAZ1A	11177	Q9NRL2	bromodomain adjacent to zinc finger domain 1A		17	0.792	0.269	1	0.01		1	1	0	2012	2012
Conventional (Clear Cell) Renal Cell Carcinoma	C0279702	MAP4K1	11184	Q92918	mitogen-activated protein kinase kinase kinase kinase 1	Kinase	33	0.678	0.5	0.98919	0.01		1	1	0	2019	2019
Conventional (Clear Cell) Renal Cell Carcinoma	C0279702	PTENP1	11191		phosphatase and tensin homolog pseudogene 1		42	0.65	0.577		0.01		1	1	0	2014	2014
Conventional (Clear Cell) Renal Cell Carcinoma	C0279702	MED8	112950	Q96G25	mediator complex subunit 8		8	0.805	0.154	2.844e-06	0.01		1	1	0	2016	2016
Conventional (Clear Cell) Renal Cell Carcinoma	C0279702	AHNAK2	113146	Q8IVF2	AHNAK nucleoprotein 2		15	0.78	0.462	0.00064799	0.01		1	1	0	2017	2017
Conventional (Clear Cell) Renal Cell Carcinoma	C0279702	PARK7	11315	Q99497	Parkinsonism associated deglycase	Enzyme	161	0.535	0.808	0.75335	0.01		1	1	0	2013	2013
Conventional (Clear Cell) Renal Cell Carcinoma	C0279702	GPR182	11318	O15218	G protein-coupled receptor 182	G-protein coupled receptor	37	0.691	0.462	0.00013704	0.01		1	1	0	2016	2016
Conventional (Clear Cell) Renal Cell Carcinoma	C0279702	ACOT7	11332	O00154	acyl-CoA thioesterase 7	Enzyme	146	0.531	0.769	0.75926	0.01		1	1	0	2019	2019
Conventional (Clear Cell) Renal Cell Carcinoma	C0279702	OIP5	11339	O43482	Opa interacting protein 5		33	0.682	0.385	1.4649e-07	0.01		1	1	0	2013	2013
Conventional (Clear Cell) Renal Cell Carcinoma	C0279702	AZIN2	113451	Q96A70	antizyme inhibitor 2	Enzyme	187	0.499	0.808	8.8707e-07	0.01		1	1	0	2019	2019
Conventional (Clear Cell) Renal Cell Carcinoma	C0279702	TRIM9	114088	Q9C026	tripartite motif containing 9		24	0.705	0.5	0.99973	0.01		1	1	0	2005	2005
Conventional (Clear Cell) Renal Cell Carcinoma	C0279702	NLRP3	114548	Q96P20	NLR family pyrin domain containing 3		805	0.361	0.962	0.00081103	0.01		1	1	0	2019	2019
Conventional (Clear Cell) Renal Cell Carcinoma	C0279702	MAL2	114569	Q969L2	mal, T cell differentiation protein 2 (gene/pseudogene)	Transporter	25	0.711	0.231	0.13691	0.01		1	1	0	2006	2006
Conventional (Clear Cell) Renal Cell Carcinoma	C0279702	MIR155HG	114614		MIR155 host gene		56	0.617	0.615		0.01		1	1	0	2018	2018
Conventional (Clear Cell) Renal Cell Carcinoma	C0279702	CIRBP	1153	Q14011	cold inducible RNA binding protein	Nucleic acid binding	72	0.592	0.731	0.33636	0.01		1	1	0	2018	2018
Conventional (Clear Cell) Renal Cell Carcinoma	C0279702	H3P42	115482704		H3 histone pseudogene 42		45	0.641	0.577		0.01		1	1	0	2018	2018
Conventional (Clear Cell) Renal Cell Carcinoma	C0279702	H3P47	115482706		H3 histone pseudogene 47		65	0.603	0.538		0.01		1	1	0	2019	2019
Conventional (Clear Cell) Renal Cell Carcinoma	C0279702	CTHRC1	115908	Q96CG8	collagen triple helix repeat containing 1	Enzyme	105	0.556	0.692	2.6661e-05	0.01		1	1	0	2016	2016
Conventional (Clear Cell) Renal Cell Carcinoma	C0279702	LRRC3B	116135	Q96PB8	leucine rich repeat containing 3B	Receptor	31	0.695	0.308	0.44415	0.01		1	1	0	2012	2012
Conventional (Clear Cell) Renal Cell Carcinoma	C0279702	CMTM5	116173	Q96DZ9	CKLF like MARVEL transmembrane domain containing 5		19	0.743	0.231	0.065782	0.01		1	1	0	2017	2017
Conventional (Clear Cell) Renal Cell Carcinoma	C0279702	MRGPRX3	117195	Q96LB0	MAS related GPR family member X3	G-protein coupled receptor	167	0.529	0.923		0.01		1	1	0	2013	2013
Conventional (Clear Cell) Renal Cell Carcinoma	C0279702	MRGPRX4	117196	Q96LA9	MAS related GPR family member X4	G-protein coupled receptor	166	0.531	0.923		0.01		1	1	0	2013	2013
Conventional (Clear Cell) Renal Cell Carcinoma	C0279702	TWIST2	117581	Q8WVJ9	twist family bHLH transcription factor 2	Transcription factor	198	0.518	0.731	0.56004	0.01		1	1	0	2018	2018
Conventional (Clear Cell) Renal Cell Carcinoma	C0279702	CLIC1	1192	O00299	chloride intracellular channel 1	Ion channel	74	0.601	0.5	0.00019265	0.01		1	1	0	2019	2019
Conventional (Clear Cell) Renal Cell Carcinoma	C0279702	GSTO2	119391	Q9H4Y5	glutathione S-transferase omega 2		53	0.631	0.692	2.6125e-09	0.01		1	1	2	2018	2018
Conventional (Clear Cell) Renal Cell Carcinoma	C0279702	SERPINA3	12	P01011	serpin family A member 3	Enzyme modulator	229	0.486	0.846	8.833e-14	0.01		1	1	0	2019	2019
Conventional (Clear Cell) Renal Cell Carcinoma	C0279702	LARGE2	120071	Q8N3Y3	LARGE xylosyl- and glucuronyltransferase 2	Enzyme	13	0.78	0.346	1.6044e-12	0.01		1	1	0	2015	2015
Conventional (Clear Cell) Renal Cell Carcinoma	C0279702	CLN3	1201	Q13286	CLN3 lysosomal/endosomal transmembrane protein, battenin	Transporter	120	0.572	0.692	1.3327e-07	0.01		1	1	0	2017	2017
Conventional (Clear Cell) Renal Cell Carcinoma	C0279702	CYP2R1	120227	Q6VVX0	cytochrome P450 family 2 subfamily R member 1		139	0.563	0.731	3.793e-10	0.01		1	1	0	2013	2013
Conventional (Clear Cell) Renal Cell Carcinoma	C0279702	TMEM52B	120939	Q4KMG9	transmembrane protein 52B		9	0.861	0.154	0.0010679	0.01		1	1	0	2016	2016
Conventional (Clear Cell) Renal Cell Carcinoma	C0279702	RHEBL1	121268	Q8TAI7	RHEB like 1	Enzyme modulator	5	0.89	0.115	2.1883e-06	0.01		1	1	0	2007	2007
Conventional (Clear Cell) Renal Cell Carcinoma	C0279702	H4-16	121504	P62805	H4 histone 16	Nucleic acid binding	122	0.54	0.692	0.022279	0.01		1	1	0	2010	2010
Conventional (Clear Cell) Renal Cell Carcinoma	C0279702	CCR3	1232	P51677	C-C motif chemokine receptor 3	G-protein coupled receptor	149	0.527	0.808	0.00012636	0.01		1	1	0	2005	2005
Conventional (Clear Cell) Renal Cell Carcinoma	C0279702	CANT1	124583	Q8WVQ1	calcium activated nucleotidase 1		111	0.619	0.731	2.5437e-06	0.01		1	1	0	2019	2019
Conventional (Clear Cell) Renal Cell Carcinoma	C0279702	SLC43A2	124935	Q8N370	solute carrier family 43 member 2	Transporter	11	0.821	0.231	0.0055443	0.01		1	1	0	2013	2013
Conventional (Clear Cell) Renal Cell Carcinoma	C0279702	PLK5	126520	Q496M5	polo like kinase 5	Kinase	11	0.78	0.192	9.1971e-05	0.01		1	1	0	2016	2016
Conventional (Clear Cell) Renal Cell Carcinoma	C0279702	B3GALT6	126792	Q96L58	beta-1,3-galactosyltransferase 6		100	0.631	0.615	0.022667	0.01		1	1	0	2017	2017
Conventional (Clear Cell) Renal Cell Carcinoma	C0279702	CNR2	1269	P34972	cannabinoid receptor 2	G-protein coupled receptor	197	0.509	0.846	6.5369e-06	0.01		1	1	0	2018	2018
Conventional (Clear Cell) Renal Cell Carcinoma	C0279702	ATP6V1G3	127124	Q96LB4	ATPase H+ transporting V1 subunit G3	Transporter	1	1	0.115	0.10745	0.01		1	1	0	2014	2014
Conventional (Clear Cell) Renal Cell Carcinoma	C0279702	COL3A1	1281	P02461	collagen type III alpha 1 chain		301	0.477	0.808	1	0.01		1	1	0	2014	2014
Conventional (Clear Cell) Renal Cell Carcinoma	C0279702	TSACC	128229	Q96A04	TSSK6 activating cochaperone		40	0.659	0.577	0.017937	0.01		1	1	0	2007	2007
Conventional (Clear Cell) Renal Cell Carcinoma	C0279702	COL4A3	1285	Q01955	collagen type IV alpha 3 chain		119	0.552	0.692	1.0699e-12	0.01		1	1	0	2008	2008
Conventional (Clear Cell) Renal Cell Carcinoma	C0279702	COL6A3	1293	P12111	collagen type VI alpha 3 chain	Receptor	156	0.563	0.769	1.8131e-20	0.01		1	1	0	2019	2019
Conventional (Clear Cell) Renal Cell Carcinoma	C0279702	RBM45	129831	Q8IUH3	RNA binding motif protein 45		557	0.383	0.846	2.1132e-10	0.01		1	1	0	1997	1997
Conventional (Clear Cell) Renal Cell Carcinoma	C0279702	AADAC	13	P22760	arylacetamide deacetylase	Enzyme	54	0.631	0.615	0.0029108	0.01		1	1	0	2013	2013
Conventional (Clear Cell) Renal Cell Carcinoma	C0279702	COL11A1	1301	P12107	collagen type XI alpha 1 chain		268	0.495	0.846	1	0.01		1	1	0	2019	2019
Conventional (Clear Cell) Renal Cell Carcinoma	C0279702	COL15A1	1306	P39059	collagen type XV alpha 1 chain		34	0.682	0.577	2.5406e-08	0.01		1	1	0	2010	2010
Conventional (Clear Cell) Renal Cell Carcinoma	C0279702	ADH7	131	P40394	alcohol dehydrogenase 7 (class IV), mu or sigma polypeptide	Enzyme	42	0.656	0.462	1.5123e-11	0.01		0	1	1	2018	2018
Conventional (Clear Cell) Renal Cell Carcinoma	C0279702	SLC31A1	1317	O15431	solute carrier family 31 member 1	Transporter	71	0.612	0.577	0.065398	0.01		1	1	0	2017	2017
Conventional (Clear Cell) Renal Cell Carcinoma	C0279702	ZFP42	132625	Q96MM3	ZFP42 zinc finger protein	Transcription factor	30	0.678	0.346		0.01		1	1	0	2006	2006
Conventional (Clear Cell) Renal Cell Carcinoma	C0279702	COX5B	1329	P10606	cytochrome c oxidase subunit 5B	Enzyme	26	0.711	0.423	0.87383	0.01		1	1	0	2019	2019
Conventional (Clear Cell) Renal Cell Carcinoma	C0279702	ADORA1	134	P30542	adenosine A1 receptor	G-protein coupled receptor	121	0.578	0.692	0.015215	0.01		1	1	0	2017	2017
Conventional (Clear Cell) Renal Cell Carcinoma	C0279702	COX6B1	1340	P14854	cytochrome c oxidase subunit 6B1		45	0.7	0.577	0.12065	0.01		1	1	0	2019	2019
Conventional (Clear Cell) Renal Cell Carcinoma	C0279702	UBE2QL1	134111	A1L167	ubiquitin conjugating enzyme E2 Q family like 1		4	0.861	0.192	0.6783	0.01		1	1	0	2013	2013
Conventional (Clear Cell) Renal Cell Carcinoma	C0279702	GPR151	134391	Q8TDV0	G protein-coupled receptor 151	G-protein coupled receptor	169	0.53	0.923	3.2266e-08	0.01		1	1	0	2013	2013
Conventional (Clear Cell) Renal Cell Carcinoma	C0279702	CP	1356	P00450	ceruloplasmin	Enzyme	283	0.466	0.846	4.2013e-10	0.01		1	1	0	2019	2019
Conventional (Clear Cell) Renal Cell Carcinoma	C0279702	CPOX	1371	P36551	coproporphyrinogen oxidase	Enzyme	246	0.488	0.846	0.17152	0.01		1	1	0	2017	2017
Conventional (Clear Cell) Renal Cell Carcinoma	C0279702	UNC5D	137970	Q6UXZ4	unc-5 netrin receptor D	Receptor	24	0.716	0.462	0.92929	0.01		1	1	0	2013	2013
Conventional (Clear Cell) Renal Cell Carcinoma	C0279702	RALYL	138046	Q86SE5	RALY RNA binding protein like		16	0.769	0.231	0.45873	0.01		1	1	0	2012	2012
Conventional (Clear Cell) Renal Cell Carcinoma	C0279702	CRABP2	1382	P29373	cellular retinoic acid binding protein 2		79	0.593	0.615	0.0015096	0.01		1	1	0	2005	2005
Conventional (Clear Cell) Renal Cell Carcinoma	C0279702	ATF2	1386	P15336	activating transcription factor 2	Transcription factor	122	0.551	0.808	0.99131	0.01		1	1	0	2016	2016
Conventional (Clear Cell) Renal Cell Carcinoma	C0279702	CRHR2	1395	Q13324	corticotropin releasing hormone receptor 2	G-protein coupled receptor	89	0.584	0.731	8.5473e-17	0.01		1	1	0	2009	2009
Conventional (Clear Cell) Renal Cell Carcinoma	C0279702	PNCK	139728	Q6P2M8	pregnancy up-regulated nonubiquitous CaM kinase	Kinase	3	0.89	0.269	1.0166e-05	0.01		1	1	0	2010	2010
Conventional (Clear Cell) Renal Cell Carcinoma	C0279702	CRK	1398	P46108	CRK proto-oncogene, adaptor protein		544	0.394	0.923	0.95936	0.01		1	1	0	2013	2013
Conventional (Clear Cell) Renal Cell Carcinoma	C0279702	HAPLN1	1404	P10915	hyaluronan and proteoglycan link protein 1	Extracellular structure	36	0.663	0.577	0.60242	0.01		1	1	0	2018	2018
Conventional (Clear Cell) Renal Cell Carcinoma	C0279702	SELENOM	140606	Q8WWX9	selenoprotein M		9	0.839	0.269	1.6327e-06	0.01		1	1	0	2019	2019
Conventional (Clear Cell) Renal Cell Carcinoma	C0279702	UBE2F	140739	Q969M7	ubiquitin conjugating enzyme E2 F (putative)		14	0.736	0.231	0.92267	0.01		1	1	0	2017	2017
Conventional (Clear Cell) Renal Cell Carcinoma	C0279702	KRT72	140807	Q14CN4	keratin 72		8	0.861	0.154	1.3674e-11	0.01		1	1	0	2015	2015
Conventional (Clear Cell) Renal Cell Carcinoma	C0279702	SRXN1	140809	Q9BYN0	sulfiredoxin 1		18	0.751	0.385	0.069723	0.01		1	1	0	2011	2011
Conventional (Clear Cell) Renal Cell Carcinoma	C0279702	CRYBA4	1413	P53673	crystallin beta A4		20	0.716	0.269	3.4999e-09	0.01		1	1	0	2019	2019
Conventional (Clear Cell) Renal Cell Carcinoma	C0279702	CRYGD	1421	P07320	crystallin gamma D		168	0.51	0.808	0.00030317	0.01		1	1	0	2010	2010
Conventional (Clear Cell) Renal Cell Carcinoma	C0279702	CRYZ	1429	Q08257	crystallin zeta		145	0.524	0.731	5.6616e-23	0.01		1	1	0	1994	1994
Conventional (Clear Cell) Renal Cell Carcinoma	C0279702	FRMPD2	143162	Q68DX3	FERM and PDZ domain containing 2		5	0.839	0.269	1.5123e-32	0.01		1	1	0	2017	2017
Conventional (Clear Cell) Renal Cell Carcinoma	C0279702	MAPK14	1432	Q16539	mitogen-activated protein kinase 14	Kinase	626	0.379	0.923	0.37466	0.01		1	1	0	2013	2013
Conventional (Clear Cell) Renal Cell Carcinoma	C0279702	CSF1	1435	P09603	colony stimulating factor 1		259	0.473	0.808	0.99634	0.01		1	1	2	2018	2018
Conventional (Clear Cell) Renal Cell Carcinoma	C0279702	PIWIL4	143689	Q7Z3Z4	piwi like RNA-mediated gene silencing 4		83	0.579	0.692	1.8323e-06	0.01		1	1	0	2019	2019
Conventional (Clear Cell) Renal Cell Carcinoma	C0279702	LAYN	143903	Q6UX15	layilin		22	0.722	0.385	1.3423e-13	0.01		1	1	0	2015	2015
Conventional (Clear Cell) Renal Cell Carcinoma	C0279702	CSF3	1440	P09919	colony stimulating factor 3		687	0.377	0.885	0.38046	0.01		1	1	0	2017	2017
Conventional (Clear Cell) Renal Cell Carcinoma	C0279702	CSNK1E	1454	P49674	casein kinase 1 epsilon		61	0.619	0.615	0.99926	0.01		1	1	0	2018	2018
Conventional (Clear Cell) Renal Cell Carcinoma	C0279702	PWAR1	145624		Prader Willi/Angelman region RNA 1		246	0.49	0.769		0.01		1	1	0	2013	2013
Conventional (Clear Cell) Renal Cell Carcinoma	C0279702	CSNK2A1	1457	P68400	casein kinase 2 alpha 1	Kinase	87	0.597	0.731	0.98711	0.01		1	1	0	2016	2016
Conventional (Clear Cell) Renal Cell Carcinoma	C0279702	MGAT5B	146664	Q3V5L5	alpha-1,6-mannosylglycoprotein 6-beta-N-acetylglucosaminyltransferase B	Enzyme	12	0.78	0.231	0.014591	0.01		1	1	0	2015	2015
Conventional (Clear Cell) Renal Cell Carcinoma	C0279702	KIF18B	146909	Q86Y91	kinesin family member 18B	Cellular structure	12	0.839	0.192	0.002309	0.01		1	1	0	2019	2019
Conventional (Clear Cell) Renal Cell Carcinoma	C0279702	DIRAS1	148252	O95057	DIRAS family GTPase 1	Enzyme modulator	20	0.722	0.231	0.388	0.01		1	1	0	2018	2018
Conventional (Clear Cell) Renal Cell Carcinoma	C0279702	SYT6	148281	Q5T7P8	synaptotagmin 6	Transporter	4	0.89	0.192	0.0081153	0.01		1	1	0	2008	2008
Conventional (Clear Cell) Renal Cell Carcinoma	C0279702	CTAG1B	1485	P78358	cancer/testis antigen 1B		166	0.507	0.731		0.01		1	1	0	2014	2014
Conventional (Clear Cell) Renal Cell Carcinoma	C0279702	CCN2	1490	P29279	cellular communication network factor 2	Signaling	518	0.399	0.846	0.00050202	0.01		1	1	0	2008	2008
Conventional (Clear Cell) Renal Cell Carcinoma	C0279702	CTNNA1	1495	P35221	catenin alpha 1	Cellular structure	82	0.584	0.538	0.96962	0.01		1	1	0	2017	2017
Conventional (Clear Cell) Renal Cell Carcinoma	C0279702	ADRA2B	151	P18089	adrenoceptor alpha 2B	G-protein coupled receptor	296	0.465	0.846	4.4533e-06	0.01		1	1	0	2013	2013
Conventional (Clear Cell) Renal Cell Carcinoma	C0279702	BTLA	151888	Q7Z6A9	B and T lymphocyte associated		74	0.593	0.577	0.020987	0.01		1	1	1	2016	2016
Conventional (Clear Cell) Renal Cell Carcinoma	C0279702	FGD5	152273	Q6ZNL6	FYVE, RhoGEF and PH domain containing 5	Enzyme modulator	24	0.78	0.346	1	0.01		1	1	0	2018	2018
Conventional (Clear Cell) Renal Cell Carcinoma	C0279702	CXADR	1525	P78310	CXADR Ig-like cell adhesion molecule		305	0.454	0.885	0.36867	0.01		1	1	0	2017	2017
Conventional (Clear Cell) Renal Cell Carcinoma	C0279702	SPINK13	153218	Q1W4C9	serine peptidase inhibitor Kazal type 13		8	0.821	0.192	0.00047605	0.01		1	1	0	2019	2019
Conventional (Clear Cell) Renal Cell Carcinoma	C0279702	CYLD	1540	Q9NQC7	CYLD lysine 63 deubiquitinase	Enzyme	211	0.498	0.846	0.99993	0.01		1	1	0	2017	2017
Conventional (Clear Cell) Renal Cell Carcinoma	C0279702	ABCA13	154664	Q86UQ4	ATP binding cassette subfamily A member 13	Transporter	26	0.722	0.308	8.7753e-114	0.01		1	1	0	2017	2017
Conventional (Clear Cell) Renal Cell Carcinoma	C0279702	AMOT	154796	Q4VCS5	angiomotin		52	0.641	0.538	0.99666	0.01		1	1	0	2013	2013
Conventional (Clear Cell) Renal Cell Carcinoma	C0279702	TMEM213	155006	A2RRL7	transmembrane protein 213		1	1	0.115	0.086669	0.01		1	1	0	2014	2014
Conventional (Clear Cell) Renal Cell Carcinoma	C0279702	CYP3A5	1577	P20815	cytochrome P450 family 3 subfamily A member 5	Enzyme	179	0.511	0.846	6.2948e-17	0.01		1	1	0	2011	2011
Conventional (Clear Cell) Renal Cell Carcinoma	C0279702	CYP4B1	1580	P13584	cytochrome P450 family 4 subfamily B member 1	Enzyme	35	0.691	0.308	3.2777e-10	0.01		1	1	0	2017	2017
Conventional (Clear Cell) Renal Cell Carcinoma	C0279702	SPAAR	158376	A0A1B0GVQ0	small regulatory polypeptide of amino acid response		28	0.711	0.385		0.01		1	1	0	2019	2019
Conventional (Clear Cell) Renal Cell Carcinoma	C0279702	ASS1P3	158452		argininosuccinate synthetase 1 pseudogene 3		2	0.931	0.115		0.01		1	1	0	2019	2019
Conventional (Clear Cell) Renal Cell Carcinoma	C0279702	CYP24A1	1591	Q07973	cytochrome P450 family 24 subfamily A member 1	Enzyme	171	0.518	0.692	3.1964e-23	0.01		1	1	0	2013	2013
Conventional (Clear Cell) Renal Cell Carcinoma	C0279702	CYP27B1	1594	O15528	cytochrome P450 family 27 subfamily B member 1	Enzyme	229	0.502	0.769	1.9194e-07	0.01		1	1	0	2013	2013
Conventional (Clear Cell) Renal Cell Carcinoma	C0279702	DACH1	1602	Q9UI36	dachshund family transcription factor 1	Transcription factor	74	0.604	0.538	0.99954	0.01		1	1	0	2008	2008
Conventional (Clear Cell) Renal Cell Carcinoma	C0279702	DCN	1634	P07585	decorin		297	0.457	0.808	0.31231	0.01		1	1	0	2016	2016
Conventional (Clear Cell) Renal Cell Carcinoma	C0279702	DDC	1644	P20711	dopa decarboxylase		164	0.535	0.769	3.7519e-08	0.01		1	1	0	2015	2015
Conventional (Clear Cell) Renal Cell Carcinoma	C0279702	OXER1	165140	Q8TDS5	oxoeicosanoid receptor 1	G-protein coupled receptor	169	0.529	0.923	7.3192e-08	0.01		1	1	0	2013	2013
Conventional (Clear Cell) Renal Cell Carcinoma	C0279702	DNAJB8	165721	Q8NHS0	DnaJ heat shock protein family (Hsp40) member B8		8	0.861	0.192	0.095207	0.01		1	1	0	2012	2012
Conventional (Clear Cell) Renal Cell Carcinoma	C0279702	DES	1674	P17661	desmin		330	0.46	0.846	0.0088282	0.01		1	1	0	2004	2004
Conventional (Clear Cell) Renal Cell Carcinoma	C0279702	DFFA	1676	O00273	DNA fragmentation factor subunit alpha		40	0.663	0.385	8.6585e-05	0.01		1	1	0	2004	2004
Conventional (Clear Cell) Renal Cell Carcinoma	C0279702	GLIS3	169792	Q8NEA6	GLIS family zinc finger 3		105	0.59	0.654	5.5977e-08	0.01		1	1	0	2009	2009
Conventional (Clear Cell) Renal Cell Carcinoma	C0279702	FUT11	170384	Q495W5	fucosyltransferase 11	Enzyme	11	0.769	0.231	1.7598e-06	0.01		1	1	0	2014	2014
Conventional (Clear Cell) Renal Cell Carcinoma	C0279702	ADAMTS18	170692	Q8TE60	ADAM metallopeptidase with thrombospondin type 1 motif 18	Enzyme	57	0.636	0.654	1.0716e-29	0.01		1	1	0	2015	2015
Conventional (Clear Cell) Renal Cell Carcinoma	C0279702	DNAJB1P1	171221		DnaJ heat shock protein family (Hsp40) member B1 pseudogene 1		51	0.65	0.654		0.01		1	1	0	2012	2012
Conventional (Clear Cell) Renal Cell Carcinoma	C0279702	DNASE1L3	1776	Q13609	deoxyribonuclease 1 like 3		126	0.575	0.769	3.0012e-05	0.01		1	1	0	2017	2017
Conventional (Clear Cell) Renal Cell Carcinoma	C0279702	DNMT3A	1788	Q9Y6K1	DNA methyltransferase 3 alpha		350	0.445	0.846	7.3538e-39	0.01		1	1	2	2016	2016
Conventional (Clear Cell) Renal Cell Carcinoma	C0279702	DNMT3B	1789	Q9UBC3	DNA methyltransferase 3 beta		315	0.453	0.846	0.19964	0.01		1	1	1	2016	2016
Conventional (Clear Cell) Renal Cell Carcinoma	C0279702	DPP4	1803	P27487	dipeptidyl peptidase 4	Enzyme	451	0.42	0.808	7.2797e-09	0.01		1	1	0	1995	1995
Conventional (Clear Cell) Renal Cell Carcinoma	C0279702	DRD1	1812	P21728	dopamine receptor D1	G-protein coupled receptor	181	0.529	0.808	0.9555	0.01		1	1	0	2019	2019
Conventional (Clear Cell) Renal Cell Carcinoma	C0279702	DRD2	1813	P14416	dopamine receptor D2	G-protein coupled receptor	437	0.436	0.846	0.74709	0.01		1	1	0	2019	2019
Conventional (Clear Cell) Renal Cell Carcinoma	C0279702	ATN1	1822	P54259	atrophin 1		499	0.409	0.885	0.99992	0.01		1	1	0	2019	2019
Conventional (Clear Cell) Renal Cell Carcinoma	C0279702	RCAN1	1827	P53805	regulator of calcineurin 1	Signaling	110	0.572	0.808	0.016675	0.01		1	1	0	2018	2018
Conventional (Clear Cell) Renal Cell Carcinoma	C0279702	DSG2	1829	Q14126	desmoglein 2	Cell adhesion	83	0.601	0.692	2.7913e-10	0.01		1	1	0	2007	2007
Conventional (Clear Cell) Renal Cell Carcinoma	C0279702	AGTR1	185	P30556	angiotensin II receptor type 1	G-protein coupled receptor	440	0.423	0.846	0.00053161	0.01		1	1	0	1995	1995
Conventional (Clear Cell) Renal Cell Carcinoma	C0279702	DVL2	1856	O14641	dishevelled segment polarity protein 2	Signaling	58	0.621	0.577	1.3576e-05	0.01		1	1	0	2016	2016
Conventional (Clear Cell) Renal Cell Carcinoma	C0279702	APLNR	187	P35414	apelin receptor	G-protein coupled receptor	94	0.588	0.692	0.78907	0.01		1	1	0	2019	2019
Conventional (Clear Cell) Renal Cell Carcinoma	C0279702	E2F2	1870	Q14209	E2F transcription factor 2	Nucleic acid binding	75	0.599	0.692	0.25505	0.01		1	1	0	2016	2016
Conventional (Clear Cell) Renal Cell Carcinoma	C0279702	ECE1	1889	P42892	endothelin converting enzyme 1	Enzyme	157	0.541	0.769	0.95987	0.01		1	1	0	2004	2004
Conventional (Clear Cell) Renal Cell Carcinoma	C0279702	ECHS1	1892	P30084	enoyl-CoA hydratase, short chain 1	Enzyme	93	0.601	0.654	0.00087731	0.01		1	1	0	2020	2020
Conventional (Clear Cell) Renal Cell Carcinoma	C0279702	ECT2	1894	Q9H8V3	epithelial cell transforming 2		65	0.603	0.615	8.0837e-10	0.01		1	1	0	2012	2012
Conventional (Clear Cell) Renal Cell Carcinoma	C0279702	S1PR1	1901	P21453	sphingosine-1-phosphate receptor 1	G-protein coupled receptor	126	0.546	0.769	0.73269	0.01		1	1	0	2019	2019
Conventional (Clear Cell) Renal Cell Carcinoma	C0279702	PHC1	1911	P78364	polyhomeotic homolog 1	Nucleic acid binding	57	0.644	0.692	0.99938	0.01		1	1	0	2006	2006
Conventional (Clear Cell) Renal Cell Carcinoma	C0279702	EFNA1	1942	P20827	ephrin A1	Kinase	69	0.61	0.5	0.46263	0.01		1	1	0	2014	2014
Conventional (Clear Cell) Renal Cell Carcinoma	C0279702	LDHD	197257	Q86WU2	lactate dehydrogenase D	Enzyme	9	0.861	0.308	1.3494e-13	0.01		1	1	0	2018	2018
Conventional (Clear Cell) Renal Cell Carcinoma	C0279702	EIF4B	1975	P23588	eukaryotic translation initiation factor 4B	Nucleic acid binding	22	0.705	0.385	0.99999	0.01		1	1	0	2017	2017
Conventional (Clear Cell) Renal Cell Carcinoma	C0279702	ELANE	1991	P08246	elastase, neutrophil expressed	Enzyme	346	0.447	0.846	0.0012274	0.01		1	1	0	2020	2020
Conventional (Clear Cell) Renal Cell Carcinoma	C0279702	CADM4	199731	Q8NFZ8	cell adhesion molecule 4		27	0.716	0.5	0.99762	0.01		1	1	0	2012	2012
Conventional (Clear Cell) Renal Cell Carcinoma	C0279702	NUDT17	200035	P0C025	nudix hydrolase 17	Enzyme	8	0.805	0.269	1.1109e-07	0.01		1	1	0	2017	2017
Conventional (Clear Cell) Renal Cell Carcinoma	C0279702	TXLNA	200081	P40222	taxilin alpha	Immune response	23	0.716	0.385	0.99731	0.01		1	1	0	2017	2017
Conventional (Clear Cell) Renal Cell Carcinoma	C0279702	ELF5	2001	Q9UKW6	E74 like ETS transcription factor 5	Transcription factor	34	0.691	0.385	0.00086946	0.01		1	1	0	2011	2011
Conventional (Clear Cell) Renal Cell Carcinoma	C0279702	ELK1	2002	P19419	ETS transcription factor ELK1	Transcription factor	114	0.537	0.692	0.93711	0.01		1	1	0	2017	2017
Conventional (Clear Cell) Renal Cell Carcinoma	C0279702	TET3	200424	O43151	tet methylcytosine dioxygenase 3		59	0.633	0.615	1	0.01		1	1	0	2017	2017
Conventional (Clear Cell) Renal Cell Carcinoma	C0279702	ELN	2006	P15502	elastin		545	0.415	0.885	2.1429e-14	0.01		1	1	0	2014	2014
Conventional (Clear Cell) Renal Cell Carcinoma	C0279702	MARK2	2011	Q7KZI7	microtubule affinity regulating kinase 2	Kinase	115	0.555	0.692	0.99999	0.01		1	1	0	2013	2013
Conventional (Clear Cell) Renal Cell Carcinoma	C0279702	CENPX	201254	A8MT69	centromere protein X		18	0.736	0.423	0.11069	0.01		1	1	0	2001	2001
Conventional (Clear Cell) Renal Cell Carcinoma	C0279702	SLC39A11	201266	Q8N1S5	solute carrier family 39 member 11	Transporter	23	0.711	0.308	2.3522e-18	0.01		1	1	1	2015	2015
Conventional (Clear Cell) Renal Cell Carcinoma	C0279702	C4orf46	201725	Q504U0	chromosome 4 open reading frame 46		5	0.861	0.115	0.039595	0.01		1	1	0	2014	2014
Conventional (Clear Cell) Renal Cell Carcinoma	C0279702	ENPEP	2028	Q07075	glutamyl aminopeptidase	Enzyme	117	0.564	0.731	1.3878e-28	0.01		1	1	0	2017	2017
Conventional (Clear Cell) Renal Cell Carcinoma	C0279702	PRSS55	203074	Q6UWB4	serine protease 55	Enzyme	163	0.513	0.769	3.1731e-11	0.01		1	1	0	2007	2007
Conventional (Clear Cell) Renal Cell Carcinoma	C0279702	NRK	203447	Q7Z2Y5	Nik related kinase	Kinase	36	0.666	0.538	0.99274	0.01		1	1	0	2018	2018
Conventional (Clear Cell) Renal Cell Carcinoma	C0279702	EPHA1	2041	P21709	EPH receptor A1	Kinase	119	0.544	0.731	1.4624e-23	0.01		1	1	0	2014	2014
Conventional (Clear Cell) Renal Cell Carcinoma	C0279702	EPHA5	2044	P54756	EPH receptor A5	Kinase	61	0.626	0.615	7.2877e-05	0.01		1	1	0	2017	2017
Conventional (Clear Cell) Renal Cell Carcinoma	C0279702	EPHB4	2050	P54760	EPH receptor B4	Kinase	157	0.524	0.692	0.013497	0.01		1	1	0	2014	2014
Conventional (Clear Cell) Renal Cell Carcinoma	C0279702	ERBB3	2065	P21860	erb-b2 receptor tyrosine kinase 3	Kinase	318	0.448	0.808	1.7003e-15	0.01		1	1	0	2004	2004
Conventional (Clear Cell) Renal Cell Carcinoma	C0279702	ERCC4	2072	Q92889	ERCC excision repair 4, endonuclease catalytic subunit	Enzyme	325	0.468	0.846	1.3758e-12	0.01		1	1	0	2016	2016
Conventional (Clear Cell) Renal Cell Carcinoma	C0279702	ERG	2078	P11308	ETS transcription factor ERG	Transcription factor	298	0.453	0.808	0.96413	0.01		1	1	0	2019	2019
Conventional (Clear Cell) Renal Cell Carcinoma	C0279702	AKT2	208	P31751	AKT serine/threonine kinase 2	Kinase	264	0.474	0.769	0.64432	0.01		1	1	0	2017	2017
Conventional (Clear Cell) Renal Cell Carcinoma	C0279702	ESRRA	2101	P11474	estrogen related receptor alpha	Nuclear receptor	112	0.548	0.654	0.59696	0.01		1	1	0	2019	2019
Conventional (Clear Cell) Renal Cell Carcinoma	C0279702	ESRRB	2103	O95718	estrogen related receptor beta	Nuclear receptor	102	0.565	0.846	0.12609	0.01		1	1	0	2019	2019
Conventional (Clear Cell) Renal Cell Carcinoma	C0279702	ESRRG	2104	P62508	estrogen related receptor gamma	Nuclear receptor	75	0.621	0.692	0.071232	0.01		1	1	0	2019	2019
Conventional (Clear Cell) Renal Cell Carcinoma	C0279702	ETS2	2114	P15036	ETS proto-oncogene 2, transcription factor	Transcription factor	115	0.548	0.808	0.99888	0.01		1	1	0	2018	2018
Conventional (Clear Cell) Renal Cell Carcinoma	C0279702	ETV1	2115	P50549	ETS variant transcription factor 1	Transcription factor	62	0.631	0.385	0.93694	0.01		1	1	0	2016	2016
Conventional (Clear Cell) Renal Cell Carcinoma	C0279702	EZH1	2145	Q92800	enhancer of zeste 1 polycomb repressive complex 2 subunit	Epigenetic regulator	38	0.663	0.577	0.042501	0.01		1	1	0	2017	2017
Conventional (Clear Cell) Renal Cell Carcinoma	C0279702	F2	2147	P00734	coagulation factor II, thrombin	Enzyme	490	0.415	0.885	0.0011118	0.01		1	1	0	1999	1999
Conventional (Clear Cell) Renal Cell Carcinoma	C0279702	ABCD1	215	P33897	ATP binding cassette subfamily D member 1	Transporter	154	0.563	0.731	0.99896	0.01		1	1	0	2010	2010
Conventional (Clear Cell) Renal Cell Carcinoma	C0279702	F2RL2	2151	O00254	coagulation factor II thrombin receptor like 2	G-protein coupled receptor	56	0.626	0.577	1.7486e-05	0.01		1	1	0	2017	2017
Conventional (Clear Cell) Renal Cell Carcinoma	C0279702	FABP1	2168	P07148	fatty acid binding protein 1		85	0.588	0.692	9.8037e-07	0.01		1	1	0	2020	2020
Conventional (Clear Cell) Renal Cell Carcinoma	C0279702	ACSL1	2180	P33121	acyl-CoA synthetase long chain family member 1	Enzyme	68	0.617	0.577	0.0015324	0.01		1	1	0	2019	2019
Conventional (Clear Cell) Renal Cell Carcinoma	C0279702	FBLN1	2192	P23142	fibulin 1		83	0.587	0.654	0.91878	0.01		1	1	0	2013	2013
Conventional (Clear Cell) Renal Cell Carcinoma	C0279702	UNC5B	219699	Q8IZJ1	unc-5 netrin receptor B	Receptor	38	0.682	0.462	2.6935e-07	0.01		1	1	0	2013	2013
Conventional (Clear Cell) Renal Cell Carcinoma	C0279702	FBN1	2200	P35555	fibrillin 1	Calcium-binding protein	552	0.417	0.846	1	0.01		1	1	0	2019	2019
Conventional (Clear Cell) Renal Cell Carcinoma	C0279702	FCER1G	2207	P30273	Fc fragment of IgE receptor Ig		35	0.674	0.615	0.66327	0.01		1	1	0	2017	2017
Conventional (Clear Cell) Renal Cell Carcinoma	C0279702	MARCHF8	220972	Q5T0T0	membrane associated ring-CH-type finger 8		87	0.59	0.692	5.8689e-07	0.01		1	1	0	2011	2011
Conventional (Clear Cell) Renal Cell Carcinoma	C0279702	ALDH3B1	221	P43353	aldehyde dehydrogenase 3 family member B1		6	0.821	0.346	6.2437e-06	0.01		0	1	0	2007	2007
Conventional (Clear Cell) Renal Cell Carcinoma	C0279702	KDM1B	221656	Q8NB78	lysine demethylase 1B	Epigenetic regulator	22	0.736	0.385	0.0014005	0.01		1	1	0	2019	2019
Conventional (Clear Cell) Renal Cell Carcinoma	C0279702	HOXA11-AS	221883		HOXA11 antisense RNA		60	0.61	0.423		0.01		1	1	0	2018	2018
Conventional (Clear Cell) Renal Cell Carcinoma	C0279702	GPRC6A	222545	Q5T6X5	G protein-coupled receptor class C group 6 member A	G-protein coupled receptor	173	0.526	0.923	5.5919e-17	0.01		1	1	0	2013	2013
Conventional (Clear Cell) Renal Cell Carcinoma	C0279702	SCUBE3	222663	Q8IX30	signal peptide, CUB domain and EGF like domain containing 3	Extracellular structure	10	0.839	0.115	0.99939	0.01		1	1	0	2011	2011
Conventional (Clear Cell) Renal Cell Carcinoma	C0279702	ALDH9A1	223	P49189	aldehyde dehydrogenase 9 family member A1	Enzyme	17	0.76	0.269	1.0995e-11	0.01		0	1	0	2007	2007
Conventional (Clear Cell) Renal Cell Carcinoma	C0279702	FGB	2244	P02675	fibrinogen beta chain	Signaling	95	0.584	0.692	0.56616	0.01		1	1	0	2019	2019
Conventional (Clear Cell) Renal Cell Carcinoma	C0279702	ALDOA	226	P04075	aldolase, fructose-bisphosphate A		61	0.631	0.615	0.0013228	0.01		1	1	0	2018	2018
Conventional (Clear Cell) Renal Cell Carcinoma	C0279702	FGFR1	2260	P11362	fibroblast growth factor receptor 1	Kinase	816	0.362	0.885	0.99984	0.01		1	1	0	2014	2014
Conventional (Clear Cell) Renal Cell Carcinoma	C0279702	FGFR4	2264	P22455	fibroblast growth factor receptor 4	Kinase	220	0.49	0.769	7.1917e-13	0.01		1	1	0	1999	1999
Conventional (Clear Cell) Renal Cell Carcinoma	C0279702	VEGFD	2277	O43915	vascular endothelial growth factor D	Signaling	132	0.538	0.769	2.498e-05	0.01		1	1	0	2008	2008
Conventional (Clear Cell) Renal Cell Carcinoma	C0279702	CHSY1	22856	Q86X52	chondroitin sulfate synthase 1	Enzyme	91	0.612	0.615	0.70781	0.01		1	1	0	2020	2020
Conventional (Clear Cell) Renal Cell Carcinoma	C0279702	MLXIP	22877	Q9HAP2	MLX interacting protein		70	0.597	0.692	0.98932	0.01		1	1	0	2011	2011
Conventional (Clear Cell) Renal Cell Carcinoma	C0279702	FKBP4	2288	Q02790	FKBP prolyl isomerase 4	Enzyme	149	0.532	0.769	0.15539	0.01		1	1	0	2018	2018
Conventional (Clear Cell) Renal Cell Carcinoma	C0279702	ZHX2	22882	Q9Y6X8	zinc fingers and homeoboxes 2	Transcription factor	172	0.51	0.654	0.03372	0.01		1	1	0	2018	2018
Conventional (Clear Cell) Renal Cell Carcinoma	C0279702	ALDOB	229	P05062	aldolase, fructose-bisphosphate B		80	0.623	0.538	7.8786e-07	0.01		1	1	0	2018	2018
Conventional (Clear Cell) Renal Cell Carcinoma	C0279702	MMRN1	22915	Q13201	multimerin 1		272	0.465	0.846	2.0714e-25	0.01		1	1	0	2010	2010
Conventional (Clear Cell) Renal Cell Carcinoma	C0279702	PLA2R1	22925	Q13018	phospholipase A2 receptor 1		59	0.633	0.577	3.2312e-30	0.01		1	1	0	2014	2014
Conventional (Clear Cell) Renal Cell Carcinoma	C0279702	SIRT2	22933	Q8IXJ6	sirtuin 2	Epigenetic regulator	172	0.51	0.769	2.3295e-08	0.01		1	1	0	2018	2018
Conventional (Clear Cell) Renal Cell Carcinoma	C0279702	ELL2	22936	O00472	elongation factor for RNA polymerase II 2	Cell-cell junction	22	0.722	0.269	0.99824	0.01		1	1	0	2017	2017
Conventional (Clear Cell) Renal Cell Carcinoma	C0279702	TPX2	22974	Q9ULW0	TPX2 microtubule nucleation factor	Cellular structure	122	0.541	0.692	0.99981	0.01		1	1	0	2017	2017
Conventional (Clear Cell) Renal Cell Carcinoma	C0279702	FOXI1	2299	Q12951	forkhead box I1	Transcription factor	42	0.686	0.462	0.77268	0.01		1	1	0	2017	2017
Conventional (Clear Cell) Renal Cell Carcinoma	C0279702	PDZD2	23037	O15018	PDZ domain containing 2	Signaling	37	0.666	0.538	0.99694	0.01		1	1	0	2017	2017
Conventional (Clear Cell) Renal Cell Carcinoma	C0279702	SETD1B	23067	Q9UPS6	SET domain containing 1B, histone lysine methyltransferase		33	0.722	0.423	1	0.01		1	1	0	2018	2018
Conventional (Clear Cell) Renal Cell Carcinoma	C0279702	AVL9	23080	Q8NBF6	AVL9 cell migration associated		11	0.792	0.231	0.0026324	0.01		1	1	0	2018	2018
Conventional (Clear Cell) Renal Cell Carcinoma	C0279702	KDM4C	23081	Q9H3R0	lysine demethylase 4C		71	0.601	0.615	6.5189e-07	0.01		1	1	0	2012	2012
Conventional (Clear Cell) Renal Cell Carcinoma	C0279702	KIF1B	23095	O60333	kinesin family member 1B	Cellular structure	213	0.516	0.808	1	0.01		1	1	0	2015	2015
Conventional (Clear Cell) Renal Cell Carcinoma	C0279702	MLANA	2315	Q16655	melan-A		92	0.579	0.692	1.2584e-09	0.01		1	1	0	2014	2014
Conventional (Clear Cell) Renal Cell Carcinoma	C0279702	FLNA	2316	P21333	filamin A		571	0.419	0.846	1	0.01		1	1	0	2014	2014
Conventional (Clear Cell) Renal Cell Carcinoma	C0279702	FLNB	2317	O75369	filamin B		374	0.458	0.923	6.0505e-10	0.01		1	1	0	2003	2003
Conventional (Clear Cell) Renal Cell Carcinoma	C0279702	FLT3	2322	P36888	fms related receptor tyrosine kinase 3	Kinase	270	0.462	0.654	0.60777	0.01		1	1	0	2015	2015
Conventional (Clear Cell) Renal Cell Carcinoma	C0279702	MCF2L	23263	O15068	MCF.2 cell line derived transforming sequence like	Signaling	124	0.559	0.769	2.7178e-07	0.01		1	1	0	2008	2008
Conventional (Clear Cell) Renal Cell Carcinoma	C0279702	WWC1	23286	Q8IX03	WW and C2 domain containing 1		71	0.61	0.692	0.00039438	0.01		1	1	0	2017	2017
Conventional (Clear Cell) Renal Cell Carcinoma	C0279702	TRIM2	23321	Q9C040	tripartite motif containing 2	Enzyme	44	0.686	0.538	0.99603	0.01		1	1	0	2018	2018
Conventional (Clear Cell) Renal Cell Carcinoma	C0279702	DICER1	23405	Q9UPY3	dicer 1, ribonuclease III	Enzyme	302	0.446	0.846	1	0.01		1	1	0	2019	2019
Conventional (Clear Cell) Renal Cell Carcinoma	C0279702	SIRT5	23408	Q9NXA8	sirtuin 5	Epigenetic regulator	63	0.61	0.615	8.6584e-10	0.01		1	1	0	2019	2019
Conventional (Clear Cell) Renal Cell Carcinoma	C0279702	TMED3	23423	Q9Y3Q3	transmembrane p24 trafficking protein 3	Transporter	21	0.736	0.462	0.022622	0.01		1	1	0	2019	2019
Conventional (Clear Cell) Renal Cell Carcinoma	C0279702	SF3B3	23450	Q15393	splicing factor 3b subunit 3	Nucleic acid binding	13	0.792	0.231	1	0.01		1	1	0	2017	2017
Conventional (Clear Cell) Renal Cell Carcinoma	C0279702	ABCB10	23456	Q9NRK6	ATP binding cassette subfamily B member 10	Transporter	22	0.716	0.423	2.9084e-08	0.01		1	1	0	2019	2019
Conventional (Clear Cell) Renal Cell Carcinoma	C0279702	HEY1	23462	Q9Y5J3	hes related family bHLH transcription factor with YRPW motif 1	Transcription factor	110	0.551	0.692	0.050181	0.01		1	1	0	2005	2005
Conventional (Clear Cell) Renal Cell Carcinoma	C0279702	TRAM1	23471	Q15629	translocation associated membrane protein 1		74	0.608	0.654	0.92506	0.01		1	1	0	2017	2017
Conventional (Clear Cell) Renal Cell Carcinoma	C0279702	DAAM2	23500	Q86T65	dishevelled associated activator of morphogenesis 2		27	0.711	0.538	1	0.01		1	1	2	2009	2009
Conventional (Clear Cell) Renal Cell Carcinoma	C0279702	CABIN1	23523	Q9Y6J0	calcineurin binding protein 1	Enzyme modulator	136	0.536	0.846	3.2844e-17	0.01		1	1	0	2017	2017
Conventional (Clear Cell) Renal Cell Carcinoma	C0279702	SRRM2	23524	Q9UQ35	serine/arginine repetitive matrix 2		101	0.564	0.692	1	0.01		1	1	0	2010	2010
Conventional (Clear Cell) Renal Cell Carcinoma	C0279702	LPAR3	23566	Q9UBY5	lysophosphatidic acid receptor 3	G-protein coupled receptor	194	0.509	0.923	0.67935	0.01		1	1	0	2013	2013
Conventional (Clear Cell) Renal Cell Carcinoma	C0279702	TMEFF2	23671	Q9UIK5	transmembrane protein with EGF like and two follistatin like domains 2	Enzyme modulator	63	0.619	0.5	7.3885e-05	0.01		1	1	0	2017	2017
Conventional (Clear Cell) Renal Cell Carcinoma	C0279702	SGK3	23678	Q96BR1	serum/glucocorticoid regulated kinase family member 3		36	0.674	0.654	8.5621e-07	0.01		1	1	0	2019	2019
Conventional (Clear Cell) Renal Cell Carcinoma	C0279702	RAB38	23682	P57729	RAB38, member RAS oncogene family		34	0.691	0.5	0.0019671	0.01		1	1	0	2015	2015
Conventional (Clear Cell) Renal Cell Carcinoma	C0279702	CADM1	23705	Q9BY67	cell adhesion molecule 1		205	0.491	0.769	0.66216	0.01		1	1	0	2014	2014
Conventional (Clear Cell) Renal Cell Carcinoma	C0279702	C3CER1	23739		chromosome 3 common eliminated region 1		10	0.839	0.231		0.01		1	1	0	2004	2004
Conventional (Clear Cell) Renal Cell Carcinoma	C0279702	PISD	23761	Q9UG56	phosphatidylserine decarboxylase		13	0.821	0.308	0.2217	0.01		1	1	0	2018	2018
Conventional (Clear Cell) Renal Cell Carcinoma	C0279702	FRK	2444	P42685	fyn related Src family tyrosine kinase	Kinase	43	0.674	0.5	1.8071e-12	0.01		1	1	0	2019	2019
Conventional (Clear Cell) Renal Cell Carcinoma	C0279702	CTAG1A	246100	P78358	cancer/testis antigen 1A		161	0.508	0.731		0.01		1	1	0	2014	2014
Conventional (Clear Cell) Renal Cell Carcinoma	C0279702	IL27	246778	Q8NEV9	interleukin 27		286	0.457	0.808	0.78232	0.01		1	1	2	2015	2015
Conventional (Clear Cell) Renal Cell Carcinoma	C0279702	ALPI	248	P09923	alkaline phosphatase, intestinal	Enzyme	98	0.563	0.769	2.4527e-18	0.01		1	1	0	1997	1997
Conventional (Clear Cell) Renal Cell Carcinoma	C0279702	FRZB	2487	Q92765	frizzled related protein		89	0.573	0.654	0.0010842	0.01		1	1	0	2010	2010
Conventional (Clear Cell) Renal Cell Carcinoma	C0279702	FTH1	2495	P02794	ferritin heavy chain 1	Storage	107	0.559	0.731	0.13999	0.01		1	1	0	2019	2019
Conventional (Clear Cell) Renal Cell Carcinoma	C0279702	FUT3	2525	P21217	fucosyltransferase 3 (Lewis blood group)	Enzyme	74	0.606	0.615	6.2991e-05	0.01		1	1	0	2017	2017
Conventional (Clear Cell) Renal Cell Carcinoma	C0279702	FUT4	2526	P22083	fucosyltransferase 4	Enzyme	168	0.505	0.731	7.7294e-06	0.01		1	1	0	2017	2017
Conventional (Clear Cell) Renal Cell Carcinoma	C0279702	STXBP4	252983	Q6ZWJ1	syntaxin binding protein 4		18	0.76	0.231	2.5154e-14	0.01		1	1	0	2020	2020
Conventional (Clear Cell) Renal Cell Carcinoma	C0279702	KDSR	2531	Q06136	3-ketodihydrosphingosine reductase		52	0.674	0.538	0.11662	0.01		1	1	0	2020	2020
Conventional (Clear Cell) Renal Cell Carcinoma	C0279702	RICTOR	253260	Q6R327	RPTOR independent companion of MTOR complex 2		82	0.592	0.615	1	0.01		1	1	0	2016	2016
Conventional (Clear Cell) Renal Cell Carcinoma	C0279702	GABPB1	2553	Q06547	GA binding protein transcription factor subunit beta 1		16	0.743	0.346	0.91121	0.01		1	1	0	2018	2018
Conventional (Clear Cell) Renal Cell Carcinoma	C0279702	B4GALNT1	2583	Q00973	beta-1,4-N-acetyl-galactosaminyltransferase 1		67	0.644	0.615	3.9259e-05	0.01		1	1	0	2019	2019
Conventional (Clear Cell) Renal Cell Carcinoma	C0279702	PART1	25859		prostate androgen-regulated transcript 1		250	0.483	0.885		0.01		1	1	0	2019	2019
Conventional (Clear Cell) Renal Cell Carcinoma	C0279702	RNF19A	25897	Q9NV58	ring finger protein 19A, RBR E3 ubiquitin protein ligase	Enzyme	523	0.397	0.923	0.025305	0.01		1	1	0	2013	2013
Conventional (Clear Cell) Renal Cell Carcinoma	C0279702	RCHY1	25898	Q96PM5	ring finger and CHY zinc finger domain containing 1	Enzyme	26	0.716	0.462	0.066203	0.01		0	1	0	2013	2013
Conventional (Clear Cell) Renal Cell Carcinoma	C0279702	AMBP	259	P02760	alpha-1-microglobulin/bikunin precursor		150	0.537	0.731	2.7886e-13	0.01		1	1	0	2005	2005
Conventional (Clear Cell) Renal Cell Carcinoma	C0279702	NCR3	259197	O14931	natural cytotoxicity triggering receptor 3		53	0.638	0.769	0.00036824	0.01		1	1	0	2018	2018
Conventional (Clear Cell) Renal Cell Carcinoma	C0279702	MRGPRX1	259249	Q96LB2	MAS related GPR family member X1	G-protein coupled receptor	166	0.531	0.923		0.01		1	1	0	2013	2013
Conventional (Clear Cell) Renal Cell Carcinoma	C0279702	ASPM	259266	Q8IZT6	abnormal spindle microtubule assembly		159	0.526	0.769	3.3502e-49	0.01		1	1	0	2019	2019
Conventional (Clear Cell) Renal Cell Carcinoma	C0279702	SOSTDC1	25928	Q6X4U4	sclerostin domain containing 1		83	0.588	0.808	0.16334	0.01		1	1	0	2008	2008
Conventional (Clear Cell) Renal Cell Carcinoma	C0279702	KANK2	25959	Q63ZY3	KN motif and ankyrin repeat domains 2		63	0.638	0.615	0.044954	0.01		1	1	0	2007	2007
Conventional (Clear Cell) Renal Cell Carcinoma	C0279702	GAPDH	2597	P04406	glyceraldehyde-3-phosphate dehydrogenase	Enzyme	305	0.447	0.808	0.11388	0.01		1	1	0	2000	2000
Conventional (Clear Cell) Renal Cell Carcinoma	C0279702	LRIG1	26018	Q96JA1	leucine rich repeats and immunoglobulin like domains 1	Receptor	83	0.601	0.538	0.035031	0.01		1	1	0	2003	2003
Conventional (Clear Cell) Renal Cell Carcinoma	C0279702	CHD5	26038	Q8TDI0	chromodomain helicase DNA binding protein 5		64	0.604	0.5	1	0.01		1	1	0	2016	2016
Conventional (Clear Cell) Renal Cell Carcinoma	C0279702	POLDIP2	26073	Q9Y2S7	DNA polymerase delta interacting protein 2		530	0.396	0.923	0.41407	0.01		1	1	0	2013	2013
Conventional (Clear Cell) Renal Cell Carcinoma	C0279702	PRPF31	26121	Q8WWY3	pre-mRNA processing factor 31	Nucleic acid binding	150	0.531	0.731	0.98313	0.01		1	1	0	2017	2017
Conventional (Clear Cell) Renal Cell Carcinoma	C0279702	GAS1	2619	P54826	growth arrest specific 1		88	0.587	0.654	0.81915	0.01		1	1	0	2017	2017
Conventional (Clear Cell) Renal Cell Carcinoma	C0279702	DGCR5	26220		DiGeorge syndrome critical region gene 5		45	0.65	0.577		0.01		1	1	0	2018	2018
Conventional (Clear Cell) Renal Cell Carcinoma	C0279702	PHGDH	26227	O43175	phosphoglycerate dehydrogenase	Enzyme	288	0.484	0.885	0.00013308	0.01		1	1	0	2017	2017
Conventional (Clear Cell) Renal Cell Carcinoma	C0279702	GATA1	2623	P15976	GATA binding protein 1		264	0.483	0.808	0.94798	0.01		1	1	0	2015	2015
Conventional (Clear Cell) Renal Cell Carcinoma	C0279702	GATA2	2624	P23769	GATA binding protein 2		229	0.496	0.654	0.97927	0.01		1	1	0	2015	2015
Conventional (Clear Cell) Renal Cell Carcinoma	C0279702	FBXO22	26263	Q8NEZ5	F-box protein 22		23	0.743	0.346	0.97746	0.01		1	1	0	2019	2019
Conventional (Clear Cell) Renal Cell Carcinoma	C0279702	LATS2	26524	Q9NRM7	large tumor suppressor kinase 2	Kinase	106	0.554	0.654	0.98807	0.01		1	1	0	2018	2018
Conventional (Clear Cell) Renal Cell Carcinoma	C0279702	GREM1	26585	O60565	gremlin 1, DAN family BMP antagonist		179	0.508	0.808	0.47436	0.01		1	1	0	2010	2010
Conventional (Clear Cell) Renal Cell Carcinoma	C0279702	GDF9	2661	O60383	growth differentiation factor 9	Signaling	44	0.644	0.385	5.5222e-06	0.01		1	1	0	2014	2014
Conventional (Clear Cell) Renal Cell Carcinoma	C0279702	AMFR	267	Q9UKV5	autocrine motility factor receptor		71	0.599	0.692	5.8368e-05	0.01		1	1	0	2015	2015
Conventional (Clear Cell) Renal Cell Carcinoma	C0279702	GGT1	2678	P19440	gamma-glutamyltransferase 1	Enzyme	209	0.496	0.885	7.5307e-05	0.01		1	1	0	2019	2019
Conventional (Clear Cell) Renal Cell Carcinoma	C0279702	GH1	2688	P01241	growth hormone 1	Signaling	686	0.373	0.923	0.030057	0.01		1	1	0	2019	2019
Conventional (Clear Cell) Renal Cell Carcinoma	C0279702	GHR	2690	P10912	growth hormone receptor	Signaling	247	0.49	0.846	8.4385e-05	0.01		1	1	0	2019	2019
Conventional (Clear Cell) Renal Cell Carcinoma	C0279702	GHRH	2691	P01286	growth hormone releasing hormone	Signaling	176	0.503	0.769	0.14964	0.01		1	1	0	2000	2000
Conventional (Clear Cell) Renal Cell Carcinoma	C0279702	GHSR	2693	Q92847	growth hormone secretagogue receptor	G-protein coupled receptor	171	0.528	0.769	0.0065825	0.01		1	1	0	2015	2015
Conventional (Clear Cell) Renal Cell Carcinoma	C0279702	GIP	2695	P09681	gastric inhibitory polypeptide		110	0.57	0.654	0.27108	0.01		1	1	0	2019	2019
Conventional (Clear Cell) Renal Cell Carcinoma	C0279702	ABL2	27	P42684	ABL proto-oncogene 2, non-receptor tyrosine kinase	Kinase	56	0.619	0.654	3.6365e-07	0.01		1	1	0	2012	2012
Conventional (Clear Cell) Renal Cell Carcinoma	C0279702	USP21	27005	Q9UK80	ubiquitin specific peptidase 21	Enzyme	16	0.76	0.346	0.0026379	0.01		1	1	0	2017	2017
Conventional (Clear Cell) Renal Cell Carcinoma	C0279702	NSG1	27065	P42857	neuronal vesicle trafficking associated 1		27	0.691	0.538	0.0088286	0.01		1	1	0	2009	2009
Conventional (Clear Cell) Renal Cell Carcinoma	C0279702	FOXP1	27086	Q9H334	forkhead box P1		317	0.46	0.808	0.99998	0.01		1	1	0	2015	2015
Conventional (Clear Cell) Renal Cell Carcinoma	C0279702	B3GAT1	27087	Q9P2W7	beta-1,3-glucuronyltransferase 1	Enzyme	199	0.494	0.769	0.13521	0.01		1	1	0	2006	2006
Conventional (Clear Cell) Renal Cell Carcinoma	C0279702	DMAC2L	27109	Q99766	distal membrane arm assembly complex 2 like		1	1	0.115	6.451e-06	0.01		1	1	0	2017	2017
Conventional (Clear Cell) Renal Cell Carcinoma	C0279702	HSPB7	27129	Q9UBY9	heat shock protein family B (small) member 7		22	0.76	0.346	0.016292	0.01		1	1	0	2014	2014
Conventional (Clear Cell) Renal Cell Carcinoma	C0279702	SIGLEC8	27181	Q9NYZ4	sialic acid binding Ig like lectin 8	Receptor	23	0.711	0.462	3.2193e-07	0.01		1	1	0	2017	2017
Conventional (Clear Cell) Renal Cell Carcinoma	C0279702	GPC3	2719	P51654	glypican 3		311	0.466	0.808	0.9982	0.01		1	1	0	2014	2014
Conventional (Clear Cell) Renal Cell Carcinoma	C0279702	RBMS3	27303	Q6XE24	RNA binding motif single stranded interacting protein 3		116	0.553	0.692	0.2128	0.01		1	1	0	2010	2010
Conventional (Clear Cell) Renal Cell Carcinoma	C0279702	TOX3	27324	O15405	TOX high mobility group box family member 3		49	0.636	0.538	0.9995	0.01		1	1	0	2019	2019
Conventional (Clear Cell) Renal Cell Carcinoma	C0279702	RPS6KA6	27330	Q9UK32	ribosomal protein S6 kinase A6	Kinase	37	0.686	0.385	0.9865	0.01		1	1	0	2013	2013
Conventional (Clear Cell) Renal Cell Carcinoma	C0279702	STK39	27347	Q9UEW8	serine/threonine kinase 39	Kinase	38	0.67	0.5	0.99916	0.01		1	1	0	2018	2018
Conventional (Clear Cell) Renal Cell Carcinoma	C0279702	GLI1	2735	P08151	GLI family zinc finger 1		369	0.431	0.846	7.6639e-14	0.01		1	1	0	2013	2013
Conventional (Clear Cell) Renal Cell Carcinoma	C0279702	SGSM3	27352	Q96HU1	small G protein signaling modulator 3	Enzyme	259	0.469	0.808	3.4061e-15	0.01		1	1	0	2017	2017
Conventional (Clear Cell) Renal Cell Carcinoma	C0279702	GLI2	2736	P10070	GLI family zinc finger 2		351	0.446	0.846	0.97303	0.01		1	1	0	2019	2019
Conventional (Clear Cell) Renal Cell Carcinoma	C0279702	PCLO	27445	Q9Y6V0	piccolo presynaptic cytomatrix protein		59	0.656	0.577	1	0.01		1	1	0	2018	2018
Conventional (Clear Cell) Renal Cell Carcinoma	C0279702	GNAI1	2770	P63096	G protein subunit alpha i1	Enzyme modulator	25	0.751	0.538	0.91125	0.01		1	1	0	2015	2015
Conventional (Clear Cell) Renal Cell Carcinoma	C0279702	GNAO1	2775	P09471	G protein subunit alpha o1	Enzyme modulator	188	0.523	0.808	0.98963	0.01		1	1	0	2015	2015
Conventional (Clear Cell) Renal Cell Carcinoma	C0279702	GNG4	2786	P50150	G protein subunit gamma 4	Enzyme modulator	10	0.821	0.231	0.15575	0.01		1	1	0	2005	2005
Conventional (Clear Cell) Renal Cell Carcinoma	C0279702	GNG7	2788	O60262	G protein subunit gamma 7	Enzyme modulator	23	0.76	0.269	0.49663	0.01		1	1	0	2019	2019
Conventional (Clear Cell) Renal Cell Carcinoma	C0279702	GPI	2821	P06744	glucose-6-phosphate isomerase	Enzyme	218	0.491	0.769	2.8385e-06	0.01		1	1	0	2015	2015
Conventional (Clear Cell) Renal Cell Carcinoma	C0279702	XCR1	2829	P46094	X-C motif chemokine receptor 1	G-protein coupled receptor	32	0.678	0.577	0.016001	0.01		1	1	0	2019	2019
Conventional (Clear Cell) Renal Cell Carcinoma	C0279702	KLHL35	283212	Q6PF15	kelch like family member 35		5	0.861	0.192	2.3745e-15	0.01		1	1	0	2011	2011
Conventional (Clear Cell) Renal Cell Carcinoma	C0279702	CAVIN1	284119	Q6NZI2	caveolae associated protein 1	Transcription factor	151	0.559	0.654	0.0049657	0.01		1	1	0	2019	2019
Conventional (Clear Cell) Renal Cell Carcinoma	C0279702	LYPD5	284348	Q6UWN5	LY6/PLAUR domain containing 5		64	0.608	0.615	0.00047161	0.01		1	1	0	2017	2017
Conventional (Clear Cell) Renal Cell Carcinoma	C0279702	IGHV1-12	28471		immunoglobulin heavy variable 1-12 (pseudogene)		89	0.569	0.654		0.01		1	1	0	1991	1991
Conventional (Clear Cell) Renal Cell Carcinoma	C0279702	DLL1	28514	O00548	delta like canonical Notch ligand 1		212	0.492	0.808	0.99999	0.01		1	1	0	1994	1994
Conventional (Clear Cell) Renal Cell Carcinoma	C0279702	SNHG15	285958		small nucleolar RNA host gene 15		48	0.633	0.615		0.01		1	1	0	2018	2018
Conventional (Clear Cell) Renal Cell Carcinoma	C0279702	ATG9B	285973	Q674R7	autophagy related 9B		8	0.792	0.269	1.2544e-17	0.01		1	1	0	2017	2017
Conventional (Clear Cell) Renal Cell Carcinoma	C0279702	DLX6-AS1	285987		DLX6 antisense RNA 1		50	0.628	0.423		0.01		1	1	0	2017	2017
Conventional (Clear Cell) Renal Cell Carcinoma	C0279702	GPR42	2866	O15529	G protein-coupled receptor 42 (gene/pseudogene)	G-protein coupled receptor	255	0.475	0.846	0.050905	0.01		1	1	0	2013	2013
Conventional (Clear Cell) Renal Cell Carcinoma	C0279702	TRIM59	286827	Q8IWR1	tripartite motif containing 59		74	0.599	0.577	0.0014575	0.01		1	1	0	2017	2017
Conventional (Clear Cell) Renal Cell Carcinoma	C0279702	GRK5	2869	P34947	G protein-coupled receptor kinase 5	Kinase	86	0.588	0.769	0.67567	0.01		1	1	0	2019	2019
Conventional (Clear Cell) Renal Cell Carcinoma	C0279702	GPX1	2876	P07203	glutathione peroxidase 1	Enzyme	290	0.458	0.923	3.8518e-05	0.01		1	1	0	2019	2019
Conventional (Clear Cell) Renal Cell Carcinoma	C0279702	GPX3	2878	P22352	glutathione peroxidase 3	Enzyme	156	0.522	0.769	0.050966	0.01		1	1	0	2015	2015
Conventional (Clear Cell) Renal Cell Carcinoma	C0279702	GRB2	2885	P62993	growth factor receptor bound protein 2		122	0.546	0.769	0.93934	0.01		1	1	0	2017	2017
Conventional (Clear Cell) Renal Cell Carcinoma	C0279702	GRIA4	2893	P48058	glutamate ionotropic receptor AMPA type subunit 4	Ion channel	75	0.631	0.615	0.01831	0.01		1	1	0	2014	2014
Conventional (Clear Cell) Renal Cell Carcinoma	C0279702	TMEM176B	28959	Q3YBM2	transmembrane protein 176B	Receptor	12	0.769	0.346	1.4172e-10	0.01		1	1	0	2014	2014
Conventional (Clear Cell) Renal Cell Carcinoma	C0279702	NOB1	28987	Q9ULX3	NIN1 (RPN12) binding protein 1 homolog		50	0.633	0.423	1.1349e-09	0.01		0	1	0	2014	2014
Conventional (Clear Cell) Renal Cell Carcinoma	C0279702	COMMD5	28991	Q9GZQ3	COMM domain containing 5	Calcium-binding protein	14	0.821	0.154	1.497e-05	0.01		1	1	0	2017	2017
Conventional (Clear Cell) Renal Cell Carcinoma	C0279702	HIPK2	28996	Q9H2X6	homeodomain interacting protein kinase 2	Kinase	102	0.566	0.731	1	0.01		1	1	0	2019	2019
Conventional (Clear Cell) Renal Cell Carcinoma	C0279702	ATAD2	29028	Q6PL18	ATPase family AAA domain containing 2	Epigenetic regulator	51	0.636	0.423	0.9982	0.01		1	1	0	2017	2017
Conventional (Clear Cell) Renal Cell Carcinoma	C0279702	NR3C1	2908	P04150	nuclear receptor subfamily 3 group C member 1	Nuclear receptor	590	0.393	0.885	0.96958	0.01		1	1	0	2011	2011
Conventional (Clear Cell) Renal Cell Carcinoma	C0279702	UBE2T	29089	Q9NPD8	ubiquitin conjugating enzyme E2 T		137	0.55	0.731	1.0599e-05	0.01		1	1	0	2019	2019
Conventional (Clear Cell) Renal Cell Carcinoma	C0279702	PYCARD	29108	Q9ULZ3	PYD and CARD domain containing	Enzyme	294	0.457	0.808	0.00019768	0.01		1	1	0	2015	2015
Conventional (Clear Cell) Renal Cell Carcinoma	C0279702	GRM1	2911	Q13255	glutamate metabotropic receptor 1	G-protein coupled receptor	172	0.528	0.808	0.14279	0.01		1	1	0	2013	2013
Conventional (Clear Cell) Renal Cell Carcinoma	C0279702	MYLIP	29116	Q8WY64	myosin regulatory light chain interacting protein		79	0.582	0.692	0.18431	0.01		1	1	0	2011	2011
Conventional (Clear Cell) Renal Cell Carcinoma	C0279702	GRM4	2914	Q14833	glutamate metabotropic receptor 4	G-protein coupled receptor	54	0.636	0.5	0.99307	0.01		1	1	1	2018	2018
Conventional (Clear Cell) Renal Cell Carcinoma	C0279702	GRM5	2915	P41594	glutamate metabotropic receptor 5	G-protein coupled receptor	189	0.525	0.846	0.99872	0.01		1	1	1	2018	2018
Conventional (Clear Cell) Renal Cell Carcinoma	C0279702	CXCL2	2920	P19875	C-X-C motif chemokine ligand 2	Signaling	186	0.513	0.885	3.6079e-07	0.01		1	1	0	2018	2018
Conventional (Clear Cell) Renal Cell Carcinoma	C0279702	PDIA3	2923	P30101	protein disulfide isomerase family A member 3		100	0.566	0.769	0.99608	0.01		1	1	0	2019	2019
Conventional (Clear Cell) Renal Cell Carcinoma	C0279702	GSK3A	2931	P49840	glycogen synthase kinase 3 alpha	Kinase	48	0.644	0.538	0.9997	0.01		1	1	0	2014	2014
Conventional (Clear Cell) Renal Cell Carcinoma	C0279702	GSN	2934	P06396	gelsolin	Cellular structure	262	0.475	0.885	3.8905e-11	0.01		1	1	0	2015	2015
Conventional (Clear Cell) Renal Cell Carcinoma	C0279702	MSH6	2956	P52701	mutS homolog 6	Nucleic acid binding	296	0.462	0.731	3.6705e-05	0.01		1	1	0	2003	2003
Conventional (Clear Cell) Renal Cell Carcinoma	C0279702	GTF2H4	2968	Q92759	general transcription factor IIH subunit 4	Transcription factor	87	0.573	0.846	4.2353e-07	0.01		1	1	0	2018	2018
Conventional (Clear Cell) Renal Cell Carcinoma	C0279702	CARD10	29775	Q9BWT7	caspase recruitment domain family member 10		41	0.656	0.423	0.0022648	0.01		1	1	0	2013	2013
Conventional (Clear Cell) Renal Cell Carcinoma	C0279702	GRHL1	29841	Q9NZI5	grainyhead like transcription factor 1	Transcription factor	29	0.7	0.423	0.2395	0.01		1	1	0	2017	2017
Conventional (Clear Cell) Renal Cell Carcinoma	C0279702	GPSM2	29899	P81274	G protein signaling modulator 2		38	0.682	0.538	7.6958e-11	0.01		1	1	0	2015	2015
Conventional (Clear Cell) Renal Cell Carcinoma	C0279702	UBIAD1	29914	Q9Y5Z9	UbiA prenyltransferase domain containing 1	Enzyme	33	0.7	0.462	0.019529	0.01		1	1	0	2013	2013
Conventional (Clear Cell) Renal Cell Carcinoma	C0279702	PSAT1	29968	Q9Y617	phosphoserine aminotransferase 1		285	0.478	0.846	1.0621e-08	0.01		1	1	0	2019	2019
Conventional (Clear Cell) Renal Cell Carcinoma	C0279702	NOP53	29997	Q9NZM5	NOP53 ribosome biogenesis factor		69	0.597	0.577	0.18147	0.01		1	1	0	2016	2016
Conventional (Clear Cell) Renal Cell Carcinoma	C0279702	GZMB	3002	P10144	granzyme B	Enzyme	290	0.453	0.808	3.6674e-14	0.01		1	1	0	1997	1997
Conventional (Clear Cell) Renal Cell Carcinoma	C0279702	ANXA1	301	P04083	annexin A1		336	0.442	0.885	1.2009e-07	0.01		1	1	0	2019	2019
Conventional (Clear Cell) Renal Cell Carcinoma	C0279702	H2AX	3014	P16104	H2A.X variant histone	Nucleic acid binding	212	0.484	0.808	0.17652	0.01		0	1	0	2015	2015
Conventional (Clear Cell) Renal Cell Carcinoma	C0279702	HAS1	3036	Q92839	hyaluronan synthase 1		45	0.67	0.577	1.3084e-12	0.01		1	1	0	2019	2019
Conventional (Clear Cell) Renal Cell Carcinoma	C0279702	HCK	3055	P08631	HCK proto-oncogene, Src family tyrosine kinase	Kinase	39	0.663	0.5	0.01976	0.01		1	1	0	2012	2012
Conventional (Clear Cell) Renal Cell Carcinoma	C0279702	HELLS	3070	Q9NRZ9	helicase, lymphoid specific		84	0.603	0.731	0.99979	0.01		1	1	0	2017	2017
Conventional (Clear Cell) Renal Cell Carcinoma	C0279702	HFE	3077	Q30201	homeostatic iron regulator		415	0.436	0.846	2.5587e-08	0.01		1	1	1	2011	2011
Conventional (Clear Cell) Renal Cell Carcinoma	C0279702	HGFAC	3083	Q04756	HGF activator	Enzyme	67	0.628	0.462	1.9843e-08	0.01		1	1	0	2004	2004
Conventional (Clear Cell) Renal Cell Carcinoma	C0279702	CD209	30835	Q9NNX6	CD209 molecule	Receptor	57	0.626	0.769	2.7418e-13	0.01		1	1	0	2011	2011
Conventional (Clear Cell) Renal Cell Carcinoma	C0279702	EHD2	30846	Q9NZN4	EH domain containing 2	Enzyme modulator	19	0.76	0.385	0.30763	0.01		1	1	0	2019	2019
Conventional (Clear Cell) Renal Cell Carcinoma	C0279702	ANXA6	309	P08133	annexin A6		156	0.514	0.846	1.0804e-08	0.01		1	1	0	2017	2017
Conventional (Clear Cell) Renal Cell Carcinoma	C0279702	HIC1	3090	Q14526	HIC ZBTB transcriptional repressor 1	Transcription factor	163	0.522	0.615	0.13002	0.01		1	1	0	2012	2012
Conventional (Clear Cell) Renal Cell Carcinoma	C0279702	ACACA	31	Q13085	acetyl-CoA carboxylase alpha		241	0.48	0.846	1	0.01		1	1	0	2018	2018
Conventional (Clear Cell) Renal Cell Carcinoma	C0279702	HLA-B	3106	P01889	major histocompatibility complex, class I, B		706	0.379	0.885	3.8642e-05	0.01		1	1	0	1999	1999
Conventional (Clear Cell) Renal Cell Carcinoma	C0279702	HLA-E	3133	P13747	major histocompatibility complex, class I, E		118	0.545	0.769	0.036773	0.01		1	1	0	2012	2012
Conventional (Clear Cell) Renal Cell Carcinoma	C0279702	HMGCR	3156	P04035	3-hydroxy-3-methylglutaryl-CoA reductase		154	0.529	0.692	0.99861	0.01		1	1	0	1996	1996
Conventional (Clear Cell) Renal Cell Carcinoma	C0279702	HMGA1	3159	P17096	high mobility group AT-hook 1	Nucleic acid binding	206	0.494	0.769	0.83209	0.01		1	1	0	2012	2012
Conventional (Clear Cell) Renal Cell Carcinoma	C0279702	HMMR	3161	O75330	hyaluronan mediated motility receptor		117	0.544	0.615	5.5222e-21	0.01		1	1	0	2002	2002
Conventional (Clear Cell) Renal Cell Carcinoma	C0279702	FOXA1	3169	P55317	forkhead box A1	Transcription factor	138	0.522	0.731	0.22227	0.01		1	1	0	2018	2018
Conventional (Clear Cell) Renal Cell Carcinoma	C0279702	HNRNPA1	3178	P09651	heterogeneous nuclear ribonucleoprotein A1		188	0.529	0.885	0.99911	0.01		1	1	0	2010	2010
Conventional (Clear Cell) Renal Cell Carcinoma	C0279702	HNRNPK	3190	P61978	heterogeneous nuclear ribonucleoprotein K	Enzyme	185	0.539	0.846	0.99998	0.01		1	1	0	2015	2015
Conventional (Clear Cell) Renal Cell Carcinoma	C0279702	HOXA3	3200	O43365	homeobox A3		36	0.695	0.538	0.9445	0.01		1	1	0	2019	2019
Conventional (Clear Cell) Renal Cell Carcinoma	C0279702	HOXA5	3202	P20719	homeobox A5	Transcription factor	79	0.595	0.577	0.0029693	0.01		1	1	0	2010	2010
Conventional (Clear Cell) Renal Cell Carcinoma	C0279702	HOXA11	3207	P31270	homeobox A11		111	0.568	0.692	0.94342	0.01		1	1	0	2017	2017
Conventional (Clear Cell) Renal Cell Carcinoma	C0279702	HOXC11	3227	O43248	homeobox C11		19	0.729	0.308	0.004059	0.01		1	1	0	2015	2015
Conventional (Clear Cell) Renal Cell Carcinoma	C0279702	HOXD3	3232	P31249	homeobox D3		38	0.67	0.462	0.44051	0.01		1	1	0	2019	2019
Conventional (Clear Cell) Renal Cell Carcinoma	C0279702	HP	3240	P00738	haptoglobin	Enzyme	464	0.412	0.885	1.736e-05	0.01		1	1	0	1989	1989
Conventional (Clear Cell) Renal Cell Carcinoma	C0279702	HRAS	3265	P01112	HRas proto-oncogene, GTPase	Enzyme modulator	698	0.378	0.885	0.079774	0.01		1	1	0	2019	2019
Conventional (Clear Cell) Renal Cell Carcinoma	C0279702	RAB37	326624	Q96AX2	RAB37, member RAS oncogene family		32	0.76	0.231	8.1116e-08	0.01		1	1	0	2009	2009
Conventional (Clear Cell) Renal Cell Carcinoma	C0279702	AGFG1	3267	P52594	ArfGAP with FG repeats 1		100	0.569	0.769	0.99276	0.01		1	1	0	2019	2019
Conventional (Clear Cell) Renal Cell Carcinoma	C0279702	HRES1	3272	P13985	HTLV-1 related endogenous sequence		54	0.636	0.615		0.01		1	1	0	1996	1996
Conventional (Clear Cell) Renal Cell Carcinoma	C0279702	HSF1	3297	Q00613	heat shock transcription factor 1	Transcription factor	185	0.507	0.769	0.74762	0.01		1	1	0	2017	2017
Conventional (Clear Cell) Renal Cell Carcinoma	C0279702	HSP90AA1	3320	P07900	heat shock protein 90 alpha family class A member 1	Chaperone	455	0.411	0.923	0.86025	0.01		1	1	0	2016	2016
Conventional (Clear Cell) Renal Cell Carcinoma	C0279702	DNAJB1	3337	P25685	DnaJ heat shock protein family (Hsp40) member B1		82	0.597	0.692	0.039437	0.01		1	1	0	2012	2012
Conventional (Clear Cell) Renal Cell Carcinoma	C0279702	APLP2	334	Q06481	amyloid beta precursor like protein 2	Enzyme modulator	44	0.659	0.462	0.37966	0.01		1	1	0	2019	2019
Conventional (Clear Cell) Renal Cell Carcinoma	C0279702	NDST1	3340	P52848	N-deacetylase and N-sulfotransferase 1		93	0.608	0.692	0.99995	0.01		1	1	0	2019	2019
Conventional (Clear Cell) Renal Cell Carcinoma	C0279702	HTC2	3342		hypertrichosis 2 (generalized, congenital)		511	0.392	0.808		0.01		1	1	0	2009	2009
Conventional (Clear Cell) Renal Cell Carcinoma	C0279702	IAPP	3375	P10997	islet amyloid polypeptide	Signaling	183	0.507	0.808	0.0031814	0.01		1	1	0	1997	1997
Conventional (Clear Cell) Renal Cell Carcinoma	C0279702	GADL1	339896	Q6ZQY3	glutamate decarboxylase like 1		192	0.497	0.808	1.3724e-21	0.01		1	1	0	2019	2019
Conventional (Clear Cell) Renal Cell Carcinoma	C0279702	ACADM	34	P11310	acyl-CoA dehydrogenase medium chain	Enzyme	94	0.638	0.462	2.0548e-12	0.01		1	1	0	2019	2019
Conventional (Clear Cell) Renal Cell Carcinoma	C0279702	TREML3P	340206		triggering receptor expressed on myeloid cells like 3, pseudogene		2	0.931	0.115		0.01		1	1	0	2018	2018
Conventional (Clear Cell) Renal Cell Carcinoma	C0279702	IDH1	3417	O75874	isocitrate dehydrogenase (NADP(+)) 1		399	0.424	0.808	2.6244e-12	0.01		1	1	0	2018	2018
Conventional (Clear Cell) Renal Cell Carcinoma	C0279702	IDUA	3425	P35475	alpha-L-iduronidase	Enzyme	258	0.499	0.846	3.7599e-13	0.01		1	1	0	2019	2019
Conventional (Clear Cell) Renal Cell Carcinoma	C0279702	GPR149	344758	Q86SP6	G protein-coupled receptor 149		3	0.931	0.154	4.3654e-09	0.01		1	1	0	2019	2019
Conventional (Clear Cell) Renal Cell Carcinoma	C0279702	ACTBL2	345651	Q562R1	actin beta like 2		134	0.539	0.769	5.8166e-16	0.01		1	1	0	2019	2019
Conventional (Clear Cell) Renal Cell Carcinoma	C0279702	IGF2	3481	P01344	insulin like growth factor 2		604	0.39	0.885	0.044127	0.01		1	1	0	1997	1997
Conventional (Clear Cell) Renal Cell Carcinoma	C0279702	IGFBP2	3485	P18065	insulin like growth factor binding protein 2	Enzyme modulator	241	0.478	0.769	0.11898	0.01		1	1	0	2017	2017
Conventional (Clear Cell) Renal Cell Carcinoma	C0279702	IGFBP4	3487	P22692	insulin like growth factor binding protein 4	Enzyme modulator	94	0.572	0.731	0.023057	0.01		1	1	0	2014	2014
Conventional (Clear Cell) Renal Cell Carcinoma	C0279702	IGFBP5	3488	P24593	insulin like growth factor binding protein 5	Enzyme modulator	126	0.544	0.692	0.96283	0.01		1	1	0	2005	2005
Conventional (Clear Cell) Renal Cell Carcinoma	C0279702	IGFBP6	3489	P24592	insulin like growth factor binding protein 6	Enzyme modulator	71	0.601	0.692	0.02915	0.01		1	1	0	2005	2005
Conventional (Clear Cell) Renal Cell Carcinoma	C0279702	APOH	350	P02749	apolipoprotein H		121	0.563	0.769	1.5614e-15	0.01		1	1	0	2018	2018
Conventional (Clear Cell) Renal Cell Carcinoma	C0279702	IL1RN	3557	P18510	interleukin 1 receptor antagonist		701	0.373	0.923	0.030914	0.01		1	1	0	2017	2017
Conventional (Clear Cell) Renal Cell Carcinoma	C0279702	AQP1	358	P29972	aquaporin 1 (Colton blood group)	Ion channel	268	0.467	0.885	2.5697e-07	0.01		1	1	0	1998	1998
Conventional (Clear Cell) Renal Cell Carcinoma	C0279702	IL15	3600	P40933	interleukin 15		426	0.422	0.846	0.70859	0.01		1	1	0	1999	1999
Conventional (Clear Cell) Renal Cell Carcinoma	C0279702	TNFRSF9	3604	Q07011	TNF receptor superfamily member 9		177	0.502	0.769	0.32153	0.01		1	1	0	2020	2020
Conventional (Clear Cell) Renal Cell Carcinoma	C0279702	IL17A	3605	Q16552	interleukin 17A		1074	0.324	0.923	0.043049	0.01		1	1	0	2018	2018
Conventional (Clear Cell) Renal Cell Carcinoma	C0279702	FOXK2	3607	Q01167	forkhead box K2		32	0.722	0.385	0.025464	0.01		1	1	0	2018	2018
Conventional (Clear Cell) Renal Cell Carcinoma	C0279702	ILF3	3609	Q12906	interleukin enhancer binding factor 3	Nucleic acid binding	68	0.621	0.654	1	0.01		1	1	0	2019	2019
Conventional (Clear Cell) Renal Cell Carcinoma	C0279702	AQP4	361	P55087	aquaporin 4	Ion channel	311	0.456	0.885	0.0022919	0.01		1	1	0	2020	2020
Conventional (Clear Cell) Renal Cell Carcinoma	C0279702	IMPA2	3613	O14732	inositol monophosphatase 2	Enzyme	26	0.695	0.385	0.0010588	0.01		1	1	0	2019	2019
Conventional (Clear Cell) Renal Cell Carcinoma	C0279702	IDO1	3620	P14902	indoleamine 2,3-dioxygenase 1		295	0.454	0.846	3.3013e-06	0.01		1	1	0	2017	2017
Conventional (Clear Cell) Renal Cell Carcinoma	C0279702	INSR	3643	P06213	insulin receptor	Kinase	452	0.432	0.846	3.6145e-05	0.01		1	1	0	2017	2017
Conventional (Clear Cell) Renal Cell Carcinoma	C0279702	INSRR	3645	P14616	insulin receptor related receptor	Kinase	186	0.508	0.808	5.3976e-24	0.01		1	1	0	2011	2011
Conventional (Clear Cell) Renal Cell Carcinoma	C0279702	IRF1	3659	P10914	interferon regulatory factor 1	Transcription factor	257	0.468	0.769	0.9909	0.01		1	1	0	2008	2008
Conventional (Clear Cell) Renal Cell Carcinoma	C0279702	AQP9	366	O43315	aquaporin 9	Ion channel	100	0.565	0.808	0.24027	0.01		1	1	0	2019	2019
Conventional (Clear Cell) Renal Cell Carcinoma	C0279702	IRF5	3663	Q13568	interferon regulatory factor 5	Transcription factor	226	0.489	0.731	0.0090365	0.01		1	1	0	2017	2017
Conventional (Clear Cell) Renal Cell Carcinoma	C0279702	ISG20	3669	Q96AZ6	interferon stimulated exonuclease gene 20		414	0.414	0.846	0.002899	0.01		1	1	0	2009	2009
Conventional (Clear Cell) Renal Cell Carcinoma	C0279702	ITGA2B	3674	P08514	integrin subunit alpha 2b		215	0.493	0.692	1.5205e-16	0.01		1	1	0	2006	2006
Conventional (Clear Cell) Renal Cell Carcinoma	C0279702	ITGA9	3680	Q13797	integrin subunit alpha 9		62	0.621	0.692	0.0081584	0.01		1	1	0	2017	2017
Conventional (Clear Cell) Renal Cell Carcinoma	C0279702	ITGAE	3682	P38570	integrin subunit alpha E		95	0.579	0.692	3.9199e-20	0.01		1	1	0	2019	2019
Conventional (Clear Cell) Renal Cell Carcinoma	C0279702	ITGB2	3689	P05107	integrin subunit beta 2	Receptor	340	0.444	0.923	5.0817e-15	0.01		1	1	0	2019	2019
Conventional (Clear Cell) Renal Cell Carcinoma	C0279702	ITGB8	3696	P26012	integrin subunit beta 8	Receptor	51	0.65	0.462	0.99767	0.01		1	1	0	2018	2018
Conventional (Clear Cell) Renal Cell Carcinoma	C0279702	ITK	3702	Q08881	IL2 inducible T cell kinase	Kinase	117	0.555	0.769	3.1402e-08	0.01		1	1	0	2015	2015
Conventional (Clear Cell) Renal Cell Carcinoma	C0279702	JAG2	3714	Q9Y219	jagged canonical Notch ligand 2		81	0.576	0.846	1	0.01		1	1	0	2017	2017
Conventional (Clear Cell) Renal Cell Carcinoma	C0279702	JAK3	3718	P52333	Janus kinase 3	Kinase	194	0.505	0.731	5.9311e-06	0.01		1	1	0	2013	2013
Conventional (Clear Cell) Renal Cell Carcinoma	C0279702	JUN	3725	P05412	Jun proto-oncogene, AP-1 transcription factor subunit	Transcription factor	344	0.442	0.885	0.05962	0.01		1	1	0	2019	2019
Conventional (Clear Cell) Renal Cell Carcinoma	C0279702	NDUFS7	374291	O75251	NADH:ubiquinone oxidoreductase core subunit S7		120	0.579	0.769	0.9142	0.01		1	1	0	2019	2019
Conventional (Clear Cell) Renal Cell Carcinoma	C0279702	KCNH2	3757	Q12809	potassium voltage-gated channel subfamily H member 2	Ion channel	189	0.522	0.731	0.99593	0.01		1	1	0	2020	2020
Conventional (Clear Cell) Renal Cell Carcinoma	C0279702	KCNJ1	3758	P48048	potassium inwardly rectifying channel subfamily J member 1	Ion channel	96	0.619	0.577	4.6255e-05	0.01		1	1	0	2015	2015
Conventional (Clear Cell) Renal Cell Carcinoma	C0279702	KHK	3795	P50053	ketohexokinase	Kinase	28	0.7	0.346	2.0668e-09	0.01		1	1	0	2006	2006
Conventional (Clear Cell) Renal Cell Carcinoma	C0279702	ACAT1	38	P24752	acetyl-CoA acetyltransferase 1	Enzyme	176	0.538	0.692	9.8525e-08	0.01		1	1	0	2019	2019
Conventional (Clear Cell) Renal Cell Carcinoma	C0279702	KLK2	3817	P20151	kallikrein related peptidase 2	Enzyme	43	0.653	0.423	0.00012775	0.01		1	1	0	1999	1999
Conventional (Clear Cell) Renal Cell Carcinoma	C0279702	KLRC1	3821	P26715	killer cell lectin like receptor C1		67	0.604	0.731	4.139e-05	0.01		1	1	0	2011	2011
Conventional (Clear Cell) Renal Cell Carcinoma	C0279702	ARG1	383	P05089	arginase 1	Enzyme	273	0.476	0.846	0.00035944	0.01		1	1	0	2009	2009
Conventional (Clear Cell) Renal Cell Carcinoma	C0279702	KIF11	3832	P52732	kinesin family member 11	Cellular structure	156	0.56	0.769	1	0.01		1	1	0	2019	2019
Conventional (Clear Cell) Renal Cell Carcinoma	C0279702	KIFC1	3833	Q9BW19	kinesin family member C1	Cellular structure	44	0.656	0.538	0.00065654	0.01		1	1	0	2018	2018
Conventional (Clear Cell) Renal Cell Carcinoma	C0279702	KPNA2	3838	P52292	karyopherin subunit alpha 2	Transporter	79	0.588	0.654	0.54133	0.01		1	1	0	2019	2019
Conventional (Clear Cell) Renal Cell Carcinoma	C0279702	ARG2	384	P78540	arginase 2	Enzyme	103	0.569	0.731	0.00018207	0.01		1	1	0	2018	2018
Conventional (Clear Cell) Renal Cell Carcinoma	C0279702	SLC16A12	387700	Q6ZSM3	solute carrier family 16 member 12		22	0.716	0.385	0.49267	0.01		1	1	0	2019	2019
Conventional (Clear Cell) Renal Cell Carcinoma	C0279702	RHOB	388	P62745	ras homolog family member B	Enzyme modulator	41	0.653	0.423	0.12253	0.01		1	1	0	2017	2017
Conventional (Clear Cell) Renal Cell Carcinoma	C0279702	TMIGD1	388364	Q6UXZ0	transmembrane and immunoglobulin domain containing 1		5	0.861	0.115	2.1298e-07	0.01		1	1	0	2018	2018
Conventional (Clear Cell) Renal Cell Carcinoma	C0279702	LINC01138	388685		long intergenic non-protein coding RNA 1138		8	0.821	0.154		0.01		1	1	0	2018	2018
Conventional (Clear Cell) Renal Cell Carcinoma	C0279702	ALKAL1	389658	Q6UXT8	ALK and LTK ligand 1		1	1	0.115	5.9081e-05	0.01		1	1	0	2018	2018
Conventional (Clear Cell) Renal Cell Carcinoma	C0279702	LAIR1	3903	Q6GTX8	leukocyte associated immunoglobulin like receptor 1	Receptor	89	0.569	0.692	3.2563e-07	0.01		1	1	0	2019	2019
Conventional (Clear Cell) Renal Cell Carcinoma	C0279702	LAMP2	3920	P13473	lysosomal associated membrane protein 2	Transporter	134	0.552	0.731	0.26698	0.01		1	1	0	2018	2018
Conventional (Clear Cell) Renal Cell Carcinoma	C0279702	LASP1	3927	Q14847	LIM and SH3 protein 1		85	0.572	0.615	0.9827	0.01		1	1	0	2014	2014
Conventional (Clear Cell) Renal Cell Carcinoma	C0279702	LBP	3929	P18428	lipopolysaccharide binding protein		156	0.525	0.808	4.1897e-15	0.01		1	1	0	2017	2017
Conventional (Clear Cell) Renal Cell Carcinoma	C0279702	LCN1	3933	P31025	lipocalin 1	Enzyme	50	0.633	0.731	1.3298e-08	0.01		1	1	0	1999	1999
Conventional (Clear Cell) Renal Cell Carcinoma	C0279702	LDHC	3948	P07864	lactate dehydrogenase C	Enzyme	29	0.711	0.5	5.2747e-07	0.01		1	1	0	2017	2017
Conventional (Clear Cell) Renal Cell Carcinoma	C0279702	LETM1	3954	O95202	leucine zipper and EF-hand containing transmembrane protein 1	Transporter	188	0.545	0.692	1.2141e-06	0.01		1	1	0	2018	2018
Conventional (Clear Cell) Renal Cell Carcinoma	C0279702	LGALS3BP	3959	Q08380	galectin 3 binding protein		127	0.546	0.769	2.679e-07	0.01		1	1	0	2011	2011
Conventional (Clear Cell) Renal Cell Carcinoma	C0279702	LGALS8	3964	O00214	galectin 8	Signaling	51	0.628	0.615	3.8769e-06	0.01		1	1	0	2015	2015
Conventional (Clear Cell) Renal Cell Carcinoma	C0279702	LGALS9	3965	O00182	galectin 9	Signaling	197	0.496	0.769	6.548e-06	0.01		1	1	0	2015	2015
Conventional (Clear Cell) Renal Cell Carcinoma	C0279702	ARHGDIB	397	P52566	Rho GDP dissociation inhibitor beta	Enzyme modulator	56	0.633	0.654	0.0006377	0.01		1	1	0	2017	2017
Conventional (Clear Cell) Renal Cell Carcinoma	C0279702	LIFR	3977	P42702	LIF receptor subunit alpha	Signaling	198	0.523	0.808	1.4888e-13	0.01		1	1	0	2018	2018
Conventional (Clear Cell) Renal Cell Carcinoma	C0279702	LIG4	3981	P49917	DNA ligase 4		293	0.478	0.846	4.1635e-06	0.01		1	1	0	2003	2003
Conventional (Clear Cell) Renal Cell Carcinoma	C0279702	LIPA	3988	P38571	lipase A, lysosomal acid type	Enzyme	130	0.564	0.654	5.532e-07	0.01		1	1	0	2018	2018
Conventional (Clear Cell) Renal Cell Carcinoma	C0279702	ASIC2	40	Q16515	acid sensing ion channel subunit 2	Ion channel	50	0.653	0.538	0.99912	0.01		1	1	0	2019	2019
Conventional (Clear Cell) Renal Cell Carcinoma	C0279702	LMNB1	4001	P20700	lamin B1		128	0.564	0.731	0.55481	0.01		1	1	0	2019	2019
Conventional (Clear Cell) Renal Cell Carcinoma	C0279702	FENDRR	400550		FOXF1 adjacent non-coding developmental regulatory RNA		40	0.653	0.577		0.01		1	1	0	2019	2019
Conventional (Clear Cell) Renal Cell Carcinoma	C0279702	LINC00511	400619		long intergenic non-protein coding RNA 511		47	0.638	0.423		0.01		1	1	0	2019	2019
Conventional (Clear Cell) Renal Cell Carcinoma	C0279702	LINC00997	401321		long intergenic non-protein coding RNA 997		4	1	0.115		0.01		1	1	0	2019	2019
Conventional (Clear Cell) Renal Cell Carcinoma	C0279702	LRP2	4036	P98164	LDL receptor related protein 2		254	0.491	0.846	0.99999	0.01		1	1	0	2008	2008
Conventional (Clear Cell) Renal Cell Carcinoma	C0279702	LSAMP	4045	Q13449	limbic system associated membrane protein		107	0.558	0.654	0.98742	0.01		1	1	0	2003	2003
Conventional (Clear Cell) Renal Cell Carcinoma	C0279702	ARNT	405	P27540	aryl hydrocarbon receptor nuclear translocator	Transcription factor	104	0.575	0.692	0.99581	0.01		1	1	0	2019	2019
Conventional (Clear Cell) Renal Cell Carcinoma	C0279702	MIRLET7B	406884		microRNA let-7b		186	0.493	0.769		0.01		1	1	0	2015	2015
Conventional (Clear Cell) Renal Cell Carcinoma	C0279702	MIRLET7C	406885		microRNA let-7c		154	0.514	0.808		0.01		1	1	0	2015	2015
Conventional (Clear Cell) Renal Cell Carcinoma	C0279702	MIRLET7F2	406889		microRNA let-7f-2		6	0.839	0.154		0.01		1	1	0	2007	2007
Conventional (Clear Cell) Renal Cell Carcinoma	C0279702	MIRLET7I	406891		microRNA let-7i		86	0.575	0.615		0.01		1	1	0	2012	2012
Conventional (Clear Cell) Renal Cell Carcinoma	C0279702	MIR107	406901		microRNA 107		123	0.543	0.769		0.01		1	1	0	2015	2015
Conventional (Clear Cell) Renal Cell Carcinoma	C0279702	MIR124-3	406909		microRNA 124-3		13	0.76	0.346		0.01		1	1	0	2013	2013
Conventional (Clear Cell) Renal Cell Carcinoma	C0279702	MIR129-2	406918		microRNA 129-2		43	0.653	0.654		0.01		1	1	0	2014	2014
Conventional (Clear Cell) Renal Cell Carcinoma	C0279702	MIR132	406921		microRNA 132		222	0.485	0.846		0.01		1	1	0	2020	2020
Conventional (Clear Cell) Renal Cell Carcinoma	C0279702	MIR134	406924		microRNA 134		126	0.542	0.769		0.01		1	1	0	2015	2015
Conventional (Clear Cell) Renal Cell Carcinoma	C0279702	MIR136	406927		microRNA 136		79	0.584	0.731		0.01		1	1	0	2018	2018
Conventional (Clear Cell) Renal Cell Carcinoma	C0279702	MIR138-1	406929		microRNA 138-1		8	0.861	0.192		0.01		1	1	0	2020	2020
Conventional (Clear Cell) Renal Cell Carcinoma	C0279702	MIR148A	406940		microRNA 148a		172	0.506	0.846		0.01		1	1	0	2017	2017
Conventional (Clear Cell) Renal Cell Carcinoma	C0279702	MIR154	406946		microRNA 154		71	0.593	0.577		0.01		1	1	0	2018	2018
Conventional (Clear Cell) Renal Cell Carcinoma	C0279702	MIR15B	406949		microRNA 15b		134	0.532	0.769		0.01		1	1	0	2019	2019
Conventional (Clear Cell) Renal Cell Carcinoma	C0279702	MIR186	406962		microRNA 186		105	0.551	0.808		0.01		1	1	0	2018	2018
Conventional (Clear Cell) Renal Cell Carcinoma	C0279702	MIR192	406967		microRNA 192		173	0.503	0.846		0.01		1	1	0	2018	2018
Conventional (Clear Cell) Renal Cell Carcinoma	C0279702	MIR196A1	406972		microRNA 196a-1		68	0.599	0.577		0.01		1	1	0	2018	2018
Conventional (Clear Cell) Renal Cell Carcinoma	C0279702	MIR196A2	406973		microRNA 196a-2		70	0.599	0.577		0.01		1	1	1	2016	2016
Conventional (Clear Cell) Renal Cell Carcinoma	C0279702	MIR198	406975		microRNA 198		51	0.633	0.462		0.01		1	1	0	2016	2016
Conventional (Clear Cell) Renal Cell Carcinoma	C0279702	MIR199A1	406976		microRNA 199a-1		87	0.578	0.577		0.01		1	1	0	2018	2018
Conventional (Clear Cell) Renal Cell Carcinoma	C0279702	MIR199A2	406977		microRNA 199a-2		87	0.578	0.577		0.01		1	1	0	2018	2018
Conventional (Clear Cell) Renal Cell Carcinoma	C0279702	ARR3	407	P36575	arrestin 3	Enzyme modulator	279	0.46	0.846	0.10401	0.01		1	1	0	2017	2017
Conventional (Clear Cell) Renal Cell Carcinoma	C0279702	MIR24-1	407012		microRNA 24-1		74	0.584	0.731		0.01		1	1	0	2017	2017
Conventional (Clear Cell) Renal Cell Carcinoma	C0279702	MIR24-2	407013		microRNA 24-2		24	0.711	0.192		0.01		1	1	0	2017	2017
Conventional (Clear Cell) Renal Cell Carcinoma	C0279702	MIR25	407014		microRNA 25		148	0.517	0.769		0.01		1	1	0	2019	2019
Conventional (Clear Cell) Renal Cell Carcinoma	C0279702	MIR26B	407017		microRNA 26b		128	0.529	0.808		0.01		1	1	0	2016	2016
Conventional (Clear Cell) Renal Cell Carcinoma	C0279702	MIR299	407023		microRNA 299		49	0.626	0.462		0.01		1	1	0	2018	2018
Conventional (Clear Cell) Renal Cell Carcinoma	C0279702	MIR30D	407033		microRNA 30d		97	0.563	0.654		0.01		1	1	0	2013	2013
Conventional (Clear Cell) Renal Cell Carcinoma	C0279702	MIR30E	407034		microRNA 30e		88	0.576	0.769		0.01		1	1	0	2017	2017
Conventional (Clear Cell) Renal Cell Carcinoma	C0279702	MIR32	407036		microRNA 32		55	0.619	0.577		0.01		1	1	0	2018	2018
Conventional (Clear Cell) Renal Cell Carcinoma	C0279702	MIR34B	407041		microRNA 34b		165	0.509	0.808		0.01		1	1	0	2015	2015
Conventional (Clear Cell) Renal Cell Carcinoma	C0279702	MIR34C	407042		microRNA 34c		131	0.541	0.885		0.01		1	1	0	2015	2015
Conventional (Clear Cell) Renal Cell Carcinoma	C0279702	MIR93	407050		microRNA 93		171	0.507	0.808		0.01		1	1	0	2017	2017
Conventional (Clear Cell) Renal Cell Carcinoma	C0279702	MIR99B	407056		microRNA 99b		52	0.633	0.615		0.01		1	1	0	2016	2016
Conventional (Clear Cell) Renal Cell Carcinoma	C0279702	CAPRIN1	4076	Q14444	cell cycle associated protein 1	Transporter	29	0.691	0.5	0.97247	0.01		1	1	0	2015	2015
Conventional (Clear Cell) Renal Cell Carcinoma	C0279702	MIR17HG	407975	Q75NE6	miR-17-92a-1 cluster host gene		224	0.483	0.808		0.01		1	1	0	2010	2010
Conventional (Clear Cell) Renal Cell Carcinoma	C0279702	TNFSF12-TNFSF13	407977	O43508	TNFSF12-TNFSF13 readthrough		91	0.579	0.615	0.76997	0.01		1	1	0	2011	2011
Conventional (Clear Cell) Renal Cell Carcinoma	C0279702	MAD2L1	4085	Q13257	mitotic arrest deficient 2 like 1		98	0.575	0.615	0.0092952	0.01		1	1	0	2014	2014
Conventional (Clear Cell) Renal Cell Carcinoma	C0279702	ARRB2	409	P32121	arrestin beta 2	Enzyme modulator	119	0.561	0.769	0.50658	0.01		1	1	0	2018	2018
Conventional (Clear Cell) Renal Cell Carcinoma	C0279702	MAGEA4	4103	P43358	MAGE family member A4	Cell adhesion	43	0.653	0.346		0.01		1	1	0	1998	1998
Conventional (Clear Cell) Renal Cell Carcinoma	C0279702	MAGEA9	4108	P43362	MAGE family member A9	Cell adhesion	5	0.861	0.115		0.01		1	1	0	2005	2005
Conventional (Clear Cell) Renal Cell Carcinoma	C0279702	MAGEB2	4113	O15479	MAGE family member B2	Cell adhesion	14	0.78	0.269		0.01		1	1	0	2005	2005
Conventional (Clear Cell) Renal Cell Carcinoma	C0279702	STS	412	P08842	steroid sulfatase	Enzyme	382	0.431	0.846	0.80886	0.01		1	1	0	2015	2015
Conventional (Clear Cell) Renal Cell Carcinoma	C0279702	MAOB	4129	P27338	monoamine oxidase B		152	0.533	0.808	0.99903	0.01		1	1	0	2018	2018
Conventional (Clear Cell) Renal Cell Carcinoma	C0279702	MAX	4149	P61244	MYC associated factor X	Transcription factor	141	0.553	0.769	0.8335	0.01		1	1	0	2017	2017
Conventional (Clear Cell) Renal Cell Carcinoma	C0279702	MB	4151	P02144	myoglobin		125	0.556	0.731	0.030636	0.01		1	1	0	2013	2013
Conventional (Clear Cell) Renal Cell Carcinoma	C0279702	MCC	4163	P23508	MCC regulator of WNT signaling pathway		110	0.568	0.731	4.6577e-16	0.01		1	1	0	1998	1998
Conventional (Clear Cell) Renal Cell Carcinoma	C0279702	MCM2	4171	P49736	minichromosome maintenance complex component 2	Enzyme	139	0.527	0.731	2.6301e-05	0.01		1	1	0	2017	2017
Conventional (Clear Cell) Renal Cell Carcinoma	C0279702	MCM3	4172	P25205	minichromosome maintenance complex component 3	Enzyme	41	0.656	0.462	6.9522e-11	0.01		1	1	0	2019	2019
Conventional (Clear Cell) Renal Cell Carcinoma	C0279702	MCM4	4173	P33991	minichromosome maintenance complex component 4	Enzyme	43	0.666	0.654	0.00014571	0.01		1	1	0	2017	2017
Conventional (Clear Cell) Renal Cell Carcinoma	C0279702	MCM5	4174	P33992	minichromosome maintenance complex component 5	Nucleic acid binding	61	0.617	0.615	0.00059281	0.01		1	1	0	2019	2019
Conventional (Clear Cell) Renal Cell Carcinoma	C0279702	MCM6	4175	Q14566	minichromosome maintenance complex component 6	Enzyme	41	0.666	0.615	0.97833	0.01		0	1	1	2010	2010
Conventional (Clear Cell) Renal Cell Carcinoma	C0279702	MAP3K3	4215	Q99759	mitogen-activated protein kinase kinase kinase 3	Kinase	57	0.626	0.692	0.98535	0.01		1	1	0	2015	2015
Conventional (Clear Cell) Renal Cell Carcinoma	C0279702	MGAT5	4249	Q09328	alpha-1,6-mannosylglycoprotein 6-beta-N-acetylglucosaminyltransferase	Enzyme	59	0.638	0.5	0.99998	0.01		1	1	0	2015	2015
Conventional (Clear Cell) Renal Cell Carcinoma	C0279702	KITLG	4254	P21583	KIT ligand		249	0.473	0.885	0.85024	0.01		1	1	0	2001	2001
Conventional (Clear Cell) Renal Cell Carcinoma	C0279702	MGP	4256	P08493	matrix Gla protein		160	0.539	0.846	3.6072e-05	0.01		1	1	0	1992	1992
Conventional (Clear Cell) Renal Cell Carcinoma	C0279702	CIITA	4261	P33076	class II major histocompatibility complex transactivator		149	0.536	0.808	1.3618e-07	0.01		1	1	0	2011	2011
Conventional (Clear Cell) Renal Cell Carcinoma	C0279702	MIF	4282	P14174	macrophage migration inhibitory factor		455	0.412	0.885	0.012262	0.01		1	1	0	2015	2015
Conventional (Clear Cell) Renal Cell Carcinoma	C0279702	MAP3K9	4293	P80192	mitogen-activated protein kinase kinase kinase 9	Kinase	22	0.711	0.269	0.11764	0.01		1	1	0	2016	2016
Conventional (Clear Cell) Renal Cell Carcinoma	C0279702	KMT2A	4297	Q03164	lysine methyltransferase 2A		535	0.41	0.885	1	0.01		1	1	0	2013	2013
Conventional (Clear Cell) Renal Cell Carcinoma	C0279702	FOXO4	4303	P98177	forkhead box O4		84	0.588	0.769	0.81332	0.01		1	1	0	2016	2016
Conventional (Clear Cell) Renal Cell Carcinoma	C0279702	NR3C2	4306	P08235	nuclear receptor subfamily 3 group C member 2	Nuclear receptor	287	0.469	0.846	0.83739	0.01		1	1	0	2018	2018
Conventional (Clear Cell) Renal Cell Carcinoma	C0279702	MMP7	4316	P09237	matrix metallopeptidase 7	Enzyme	320	0.446	0.885	1.0404e-09	0.01		1	1	0	2003	2003
Conventional (Clear Cell) Renal Cell Carcinoma	C0279702	MMP11	4320	P24347	matrix metallopeptidase 11	Enzyme	130	0.542	0.692	2.4125e-05	0.01		1	1	0	2014	2014
Conventional (Clear Cell) Renal Cell Carcinoma	C0279702	MMP13	4322	P45452	matrix metallopeptidase 13	Enzyme	328	0.452	0.923	7.8767e-18	0.01		1	1	0	2008	2008
Conventional (Clear Cell) Renal Cell Carcinoma	C0279702	MMP14	4323	P50281	matrix metallopeptidase 14	Enzyme	340	0.447	0.769	0.99522	0.01		1	1	0	2011	2011
Conventional (Clear Cell) Renal Cell Carcinoma	C0279702	ALDH6A1	4329	Q02252	aldehyde dehydrogenase 6 family member A1	Enzyme	41	0.716	0.462	7.5619e-10	0.01		1	1	0	2020	2020
Conventional (Clear Cell) Renal Cell Carcinoma	C0279702	MIAT	440823		myocardial infarction associated transcript		84	0.573	0.692		0.01		1	1	0	2018	2018
Conventional (Clear Cell) Renal Cell Carcinoma	C0279702	POTEKP	440915	Q9BYX7	POTE ankyrin domain family member K, pseudogene		131	0.542	0.769		0.01		1	1	0	2019	2019
Conventional (Clear Cell) Renal Cell Carcinoma	C0279702	VN1R17P	441931	Q8TDU5	vomeronasal 1 receptor 17 pseudogene		167	0.529	0.923		0.01		1	1	0	2013	2013
Conventional (Clear Cell) Renal Cell Carcinoma	C0279702	ZFAS1	441951		ZNFX1 antisense RNA 1		82	0.582	0.615		0.01		1	1	0	2019	2019
Conventional (Clear Cell) Renal Cell Carcinoma	C0279702	GPR166P	442206		G protein-coupled receptor 166 pseudogene		165	0.531	0.923		0.01		1	1	0	2013	2013
Conventional (Clear Cell) Renal Cell Carcinoma	C0279702	XRCC6P5	442459		X-ray repair cross complementing 6 pseudogene 5		84	0.579	0.769		0.01		1	1	0	2003	2003
Conventional (Clear Cell) Renal Cell Carcinoma	C0279702	MIR302C	442895		microRNA 302c		24	0.711	0.269		0.01		1	1	0	2017	2017
Conventional (Clear Cell) Renal Cell Carcinoma	C0279702	MIR328	442901		microRNA 328		99	0.558	0.769		0.01		1	1	0	2020	2020
Conventional (Clear Cell) Renal Cell Carcinoma	C0279702	MIR367	442912		microRNA 367		71	0.59	0.654		0.01		1	1	0	2017	2017
Conventional (Clear Cell) Renal Cell Carcinoma	C0279702	MSMB	4477	P08118	microseminoprotein beta	Signaling	195	0.498	0.846	0.016199	0.01		1	1	0	2005	2005
Conventional (Clear Cell) Renal Cell Carcinoma	C0279702	MSN	4478	P26038	moesin	Cellular structure	140	0.534	0.769	0.99967	0.01		0	1	0	2020	2020
Conventional (Clear Cell) Renal Cell Carcinoma	C0279702	MST1R	4486	Q04912	macrophage stimulating 1 receptor	Kinase	133	0.542	0.808	7.8684e-37	0.01		1	1	0	2017	2017
Conventional (Clear Cell) Renal Cell Carcinoma	C0279702	MT1A	4489	P04731	metallothionein 1A		128	0.537	0.808	0.0044674	0.01		1	1	0	2000	2000
Conventional (Clear Cell) Renal Cell Carcinoma	C0279702	MT1H	4496	P80294	metallothionein 1H		49	0.638	0.654	0.0063432	0.01		1	1	0	2000	2000
Conventional (Clear Cell) Renal Cell Carcinoma	C0279702	MT1M	4499	Q8N339	metallothionein 1M		58	0.617	0.692	0.0043473	0.01		1	1	0	2019	2019
Conventional (Clear Cell) Renal Cell Carcinoma	C0279702	MTAP	4507	Q13126	methylthioadenosine phosphorylase	Enzyme	167	0.514	0.731	7.5973e-08	0.01		1	1	0	2019	2019
Conventional (Clear Cell) Renal Cell Carcinoma	C0279702	COX1	4512	P00395	cytochrome c oxidase subunit I	Enzyme	421	0.441	0.885		0.01		1	1	0	2013	2013
Conventional (Clear Cell) Renal Cell Carcinoma	C0279702	MTHFD1	4522	P11586	methylenetetrahydrofolate dehydrogenase, cyclohydrolase and formyltetrahydrofolate synthetase 1	Enzyme	121	0.554	0.769	0.0044614	0.01		1	1	0	2018	2018
Conventional (Clear Cell) Renal Cell Carcinoma	C0279702	ND3	4537	P03897	NADH dehydrogenase, subunit 3 (complex I)		113	0.604	0.654		0.01		1	1	0	1996	1996
Conventional (Clear Cell) Renal Cell Carcinoma	C0279702	MTNR1A	4543	P48039	melatonin receptor 1A	G-protein coupled receptor	79	0.59	0.808	7.2327e-07	0.01		1	1	0	2016	2016
Conventional (Clear Cell) Renal Cell Carcinoma	C0279702	MTRR	4552	Q9UBK8	5-methyltetrahydrofolate-homocysteine methyltransferase reductase		207	0.502	0.808	2.1794e-14	0.01		1	1	1	2013	2013
Conventional (Clear Cell) Renal Cell Carcinoma	C0279702	MUC5AC	4586	P98088	mucin 5AC, oligomeric mucus/gel-forming	Enzyme modulator	224	0.483	0.808	9.9887e-09	0.01		1	1	0	2017	2017
Conventional (Clear Cell) Renal Cell Carcinoma	C0279702	MMUT	4594	P22033	methylmalonyl-CoA mutase	Enzyme	147	0.534	0.731	1.7087e-22	0.01		1	1	0	2017	2017
Conventional (Clear Cell) Renal Cell Carcinoma	C0279702	MVD	4597	P53602	mevalonate diphosphate decarboxylase		101	0.568	0.769	2.7438e-17	0.01		1	1	0	2007	2007
Conventional (Clear Cell) Renal Cell Carcinoma	C0279702	MXI1	4601	P50539	MAX interactor 1, dimerization protein	Transcription factor	128	0.547	0.615	0.0011217	0.01		1	1	0	2014	2014
Conventional (Clear Cell) Renal Cell Carcinoma	C0279702	MYCL	4610	P12524	MYCL proto-oncogene, bHLH transcription factor	Transcription factor	79	0.599	0.731	0.11551	0.01		0	1	0	1996	1996
Conventional (Clear Cell) Renal Cell Carcinoma	C0279702	MYH9	4627	P35579	myosin heavy chain 9		196	0.505	0.808	1	0.01		1	1	0	2016	2016
Conventional (Clear Cell) Renal Cell Carcinoma	C0279702	MYL2	4633	P10916	myosin light chain 2	Calcium-binding protein	104	0.601	0.615	2.7303e-08	0.01		1	1	0	2005	2005
Conventional (Clear Cell) Renal Cell Carcinoma	C0279702	ATF4	468	P18848	activating transcription factor 4		178	0.507	0.769	0.015659	0.01		1	1	0	2018	2018
Conventional (Clear Cell) Renal Cell Carcinoma	C0279702	CEACAM6	4680	P40199	CEA cell adhesion molecule 6		110	0.561	0.731	1.1884e-06	0.01		1	1	0	2019	2019
Conventional (Clear Cell) Renal Cell Carcinoma	C0279702	NBN	4683	O60934	nibrin	Nucleic acid binding	291	0.467	0.808	2.1838e-16	0.01		1	1	1	2015	2015
Conventional (Clear Cell) Renal Cell Carcinoma	C0279702	NCF2	4688	P19878	neutrophil cytosolic factor 2	Enzyme	90	0.601	0.692	4.0054e-07	0.01		1	1	0	2011	2011
Conventional (Clear Cell) Renal Cell Carcinoma	C0279702	NCL	4691	P19338	nucleolin	Nucleic acid binding	167	0.509	0.808	0.99992	0.01		0	1	0	2014	2014
Conventional (Clear Cell) Renal Cell Carcinoma	C0279702	ACLY	47	P53396	ATP citrate lyase	Enzyme	109	0.563	0.692	0.083556	0.01		1	1	0	2018	2018
Conventional (Clear Cell) Renal Cell Carcinoma	C0279702	ATIC	471	P31939	5-aminoimidazole-4-carboxamide ribonucleotide formyltransferase/IMP cyclohydrolase	Enzyme	100	0.576	0.731	3.0109e-19	0.01		1	1	0	2010	2010
Conventional (Clear Cell) Renal Cell Carcinoma	C0279702	NDUFB6	4712	O95139	NADH:ubiquinone oxidoreductase subunit B6		11	0.821	0.231	0.00016201	0.01		1	1	0	2015	2015
Conventional (Clear Cell) Renal Cell Carcinoma	C0279702	NDUFS1	4719	P28331	NADH:ubiquinone oxidoreductase core subunit S1	Enzyme	112	0.595	0.692	6.626e-11	0.01		1	1	0	2017	2017
Conventional (Clear Cell) Renal Cell Carcinoma	C0279702	NEDD8	4738	Q15843	NEDD8 ubiquitin like modifier	Nucleic acid binding	88	0.576	0.692	0.84938	0.01		1	1	0	2017	2017
Conventional (Clear Cell) Renal Cell Carcinoma	C0279702	NEFH	4744	P12036	neurofilament heavy		120	0.588	0.769	2.6684e-12	0.01		1	1	0	2014	2014
Conventional (Clear Cell) Renal Cell Carcinoma	C0279702	NELL1	4745	Q92832	neural EGFL like 1	Calcium-binding protein	122	0.539	0.731	8.6694e-12	0.01		1	1	0	2015	2015
Conventional (Clear Cell) Renal Cell Carcinoma	C0279702	NEK1	4750	Q96PY6	NIMA related kinase 1	Kinase	131	0.575	0.769	1.9084e-25	0.01		1	1	0	2014	2014
Conventional (Clear Cell) Renal Cell Carcinoma	C0279702	NELL2	4753	Q99435	neural EGFL like 2	Calcium-binding protein	45	0.641	0.462	0.99952	0.01		1	1	0	2015	2015
Conventional (Clear Cell) Renal Cell Carcinoma	C0279702	NEU1	4758	Q99519	neuraminidase 1	Enzyme	207	0.513	0.769	7.3441e-05	0.01		1	1	0	1990	1990
Conventional (Clear Cell) Renal Cell Carcinoma	C0279702	NFATC1	4772	O95644	nuclear factor of activated T cells 1	Transcription factor	161	0.517	0.731	0.15652	0.01		1	1	0	2019	2019
Conventional (Clear Cell) Renal Cell Carcinoma	C0279702	NFIA	4774	Q12857	nuclear factor I A	Nucleic acid binding	95	0.599	0.808	0.99959	0.01		1	1	0	2011	2011
Conventional (Clear Cell) Renal Cell Carcinoma	C0279702	NFIC	4782	P08651	nuclear factor I C	Nucleic acid binding	63	0.626	0.654	0.090534	0.01		1	1	0	2011	2011
Conventional (Clear Cell) Renal Cell Carcinoma	C0279702	NGFR	4804	P08138	nerve growth factor receptor	Receptor	256	0.477	0.846	0.097889	0.01		1	1	0	2016	2016
Conventional (Clear Cell) Renal Cell Carcinoma	C0279702	NME2	4831	P22392	NME/NM23 nucleoside diphosphate kinase 2	Kinase	95	0.573	0.731	8.8471e-09	0.01		1	1	0	2011	2011
Conventional (Clear Cell) Renal Cell Carcinoma	C0279702	NOS1	4842	P29475	nitric oxide synthase 1		521	0.408	0.885	1	0.01		1	1	0	2004	2004
Conventional (Clear Cell) Renal Cell Carcinoma	C0279702	NOTCH3	4854	Q9UM47	notch receptor 3		418	0.435	0.808	0.40757	0.01		1	1	0	2000	2000
Conventional (Clear Cell) Renal Cell Carcinoma	C0279702	NRAS	4893	P01111	NRAS proto-oncogene, GTPase	Enzyme modulator	611	0.39	0.808	0.49009	0.01		1	1	1	1994	1994
Conventional (Clear Cell) Renal Cell Carcinoma	C0279702	ACR	49	P10323	acrosin	Enzyme	230	0.493	0.846	0.012215	0.01		1	1	0	2019	2019
Conventional (Clear Cell) Renal Cell Carcinoma	C0279702	ATP2B1	490	P20020	ATPase plasma membrane Ca2+ transporting 1	Transporter	57	0.666	0.5	1	0.01		1	1	0	2018	2018
Conventional (Clear Cell) Renal Cell Carcinoma	C0279702	NT5E	4907	P21589	5'-nucleotidase ecto	Enzyme	376	0.436	0.885	2.2881e-11	0.01		1	1	0	2017	2017
Conventional (Clear Cell) Renal Cell Carcinoma	C0279702	NTRK1	4914	P04629	neurotrophic receptor tyrosine kinase 1	Kinase	443	0.422	0.808	1.9568e-06	0.01		1	1	0	2017	2017
Conventional (Clear Cell) Renal Cell Carcinoma	C0279702	MIR375	494324		microRNA 375		226	0.476	0.769		0.01		1	1	0	2018	2018
Conventional (Clear Cell) Renal Cell Carcinoma	C0279702	MIR376A1	494325		microRNA 376a-1		25	0.7	0.346		0.01		1	1	0	2019	2019
Conventional (Clear Cell) Renal Cell Carcinoma	C0279702	MIR377	494326		microRNA 377		74	0.587	0.731		0.01		1	1	0	2015	2015
Conventional (Clear Cell) Renal Cell Carcinoma	C0279702	MIR381	494330		microRNA 381		79	0.584	0.654		0.01		1	1	0	2019	2019
Conventional (Clear Cell) Renal Cell Carcinoma	C0279702	MIR383	494332		microRNA 383		65	0.608	0.731		0.01		1	1	0	2011	2011
Conventional (Clear Cell) Renal Cell Carcinoma	C0279702	ATP5F1A	498	P25705	ATP synthase F1 subunit alpha	Transporter	84	0.604	0.731	0.99945	0.01		1	1	0	2018	2018
Conventional (Clear Cell) Renal Cell Carcinoma	C0279702	ORC2	4999	Q13416	origin recognition complex subunit 2	Nucleic acid binding	5	0.861	0.115	0.84443	0.01		1	1	0	2008	2008
Conventional (Clear Cell) Renal Cell Carcinoma	C0279702	OTX1	5013	P32242	orthodenticle homeobox 1	Transcription factor	35	0.686	0.385	0.85508	0.01		1	1	0	2019	2019
Conventional (Clear Cell) Renal Cell Carcinoma	C0279702	OVOL1	5017	O14753	ovo like transcriptional repressor 1		27	0.716	0.423	0.87808	0.01		0	1	0	2012	2012
Conventional (Clear Cell) Renal Cell Carcinoma	C0279702	P4HB	5034	P07237	prolyl 4-hydroxylase subunit beta		222	0.488	0.808	0.99662	0.01		1	1	0	2019	2019
Conventional (Clear Cell) Renal Cell Carcinoma	C0279702	DUXAP9	503638		double homeobox A pseudogene 9		48	0.628	0.423		0.01		1	1	0	2019	2019
Conventional (Clear Cell) Renal Cell Carcinoma	C0279702	PAEP	5047	P09466	progestagen associated endometrial protein	Enzyme	397	0.43	0.846	3.1109e-08	0.01		1	1	0	2018	2018
Conventional (Clear Cell) Renal Cell Carcinoma	C0279702	PAFAH1B1	5048	P43034	platelet activating factor acetylhydrolase 1b regulatory subunit 1		219	0.504	0.769	0.99995	0.01		1	1	0	2018	2018
Conventional (Clear Cell) Renal Cell Carcinoma	C0279702	SYCP3	50511	Q8IZU3	synaptonemal complex protein 3		38	0.663	0.385	9.1772e-05	0.01		1	1	0	2014	2014
Conventional (Clear Cell) Renal Cell Carcinoma	C0279702	DELEC1	50514	Q9P2X7	deleted in esophageal cancer 1		92	0.573	0.692	2.6727e-05	0.01		1	1	0	2015	2015
Conventional (Clear Cell) Renal Cell Carcinoma	C0279702	PRDX1	5052	Q06830	peroxiredoxin 1	Enzyme	237	0.485	0.846	7.6959e-10	0.01		1	1	0	2019	2019
Conventional (Clear Cell) Renal Cell Carcinoma	C0279702	ATP6V0A4	50617	Q9HBG4	ATPase H+ transporting V0 subunit a4	Transporter	21	0.722	0.385	2.1504e-20	0.01		1	1	0	2014	2014
Conventional (Clear Cell) Renal Cell Carcinoma	C0279702	DEF6	50619	Q9H4E7	DEF6 guanine nucleotide exchange factor	Nucleic acid binding	22	0.751	0.346	0.99768	0.01		1	1	0	2014	2014
Conventional (Clear Cell) Renal Cell Carcinoma	C0279702	GEMIN4	50628	P57678	gem nuclear organelle associated protein 4		101	0.565	0.808	5.8966e-13	0.01		1	1	0	2008	2008
Conventional (Clear Cell) Renal Cell Carcinoma	C0279702	PAPPA	5069	Q13219	pappalysin 1		125	0.558	0.692	0.1613	0.01		1	1	0	2019	2019
Conventional (Clear Cell) Renal Cell Carcinoma	C0279702	F11R	50848	Q9Y624	F11 receptor		127	0.542	0.731	1.8487e-05	0.01		1	1	0	2009	2009
Conventional (Clear Cell) Renal Cell Carcinoma	C0279702	PBX1	5087	P40424	PBX homeobox 1	Transcription factor	167	0.534	0.846	0.99527	0.01		0	1	0	2018	2018
Conventional (Clear Cell) Renal Cell Carcinoma	C0279702	PCBP2	5094	Q15366	poly(rC) binding protein 2	Enzyme	44	0.647	0.577	0.99617	0.01		1	1	0	2018	2018
Conventional (Clear Cell) Renal Cell Carcinoma	C0279702	PCDHGC3	5098	Q9UN70	protocadherin gamma subfamily C, 3		10	0.89	0.154	0.12536	0.01		1	1	0	2018	2018
Conventional (Clear Cell) Renal Cell Carcinoma	C0279702	SERPINA5	5104	P05154	serpin family A member 5	Enzyme modulator	185	0.507	0.808	6.2368e-09	0.01		1	1	0	2004	2004
Conventional (Clear Cell) Renal Cell Carcinoma	C0279702	NDUFA13	51079	Q9P0J0	NADH:ubiquinone oxidoreductase subunit A13	Enzyme	131	0.556	0.692	3.8049e-06	0.01		1	1	0	2006	2006
Conventional (Clear Cell) Renal Cell Carcinoma	C0279702	GAL	51083	P22466	galanin and GMAP prepropeptide		226	0.493	0.846	4.3885e-06	0.01		1	1	0	1997	1997
Conventional (Clear Cell) Renal Cell Carcinoma	C0279702	CHCHD2	51142	Q9Y6H1	coiled-coil-helix-coiled-coil-helix domain containing 2		57	0.638	0.538	1.7328e-07	0.01		1	1	0	2019	2019
Conventional (Clear Cell) Renal Cell Carcinoma	C0279702	SDF4	51150	Q9BRK5	stromal cell derived factor 4	Calcium-binding protein	74	0.595	0.654	0.0091042	0.01		1	1	0	2002	2002
Conventional (Clear Cell) Renal Cell Carcinoma	C0279702	EGFL7	51162	Q9UHF1	EGF like domain multiple 7	Calcium-binding protein	68	0.612	0.577	5.5498e-18	0.01		1	1	0	2014	2014
Conventional (Clear Cell) Renal Cell Carcinoma	C0279702	LEF1	51176	Q9UJU2	lymphoid enhancer binding factor 1		211	0.486	0.769	0.99789	0.01		1	1	0	2020	2020
Conventional (Clear Cell) Renal Cell Carcinoma	C0279702	HAO2	51179	Q9NYQ3	hydroxyacid oxidase 2	Enzyme	22	0.736	0.308	5.9977e-10	0.01		1	1	0	2019	2019
Conventional (Clear Cell) Renal Cell Carcinoma	C0279702	HSPA14	51182	Q0VDF9	heat shock protein family A (Hsp70) member 14		178	0.502	0.769	0.67359	0.01		1	1	0	2019	2019
Conventional (Clear Cell) Renal Cell Carcinoma	C0279702	CHMP1A	5119	Q9HD42	charged multivesicular body protein 1A		43	0.695	0.5	0.00028502	0.01		1	1	0	2012	2012
Conventional (Clear Cell) Renal Cell Carcinoma	C0279702	NUSAP1	51203	Q9BXS6	nucleolar and spindle associated protein 1		55	0.623	0.346	0.045674	0.01		1	1	0	2016	2016
Conventional (Clear Cell) Renal Cell Carcinoma	C0279702	CLEC1B	51266	Q9P126	C-type lectin domain family 1 member B		58	0.65	0.615	4.9365e-08	0.01		1	1	0	2016	2016
Conventional (Clear Cell) Renal Cell Carcinoma	C0279702	TLR7	51284	Q9NYK1	toll like receptor 7		276	0.464	0.885	0.97912	0.01		1	1	0	2009	2009
Conventional (Clear Cell) Renal Cell Carcinoma	C0279702	SLC22A17	51310	Q8WUG5	solute carrier family 22 member 17	Transporter	22	0.736	0.462	0.010603	0.01		1	1	0	2018	2018
Conventional (Clear Cell) Renal Cell Carcinoma	C0279702	PLAC8	51316	Q9NZF1	placenta associated 8		48	0.641	0.654	0.11953	0.01		1	1	0	2017	2017
Conventional (Clear Cell) Renal Cell Carcinoma	C0279702	PDC	5132	P20941	phosducin		95	0.581	0.731	0.00010134	0.01		1	1	0	2011	2011
Conventional (Clear Cell) Renal Cell Carcinoma	C0279702	TNFRSF12A	51330	Q9NP84	TNF receptor superfamily member 12A		173	0.509	0.692	0.017995	0.01		1	1	0	2011	2011
Conventional (Clear Cell) Renal Cell Carcinoma	C0279702	COMMD10	51397	Q9Y6G5	COMM domain containing 10		17	0.78	0.269	6.4803e-12	0.01		1	1	0	2019	2019
Conventional (Clear Cell) Renal Cell Carcinoma	C0279702	SFMBT1	51460	Q9UHJ3	Scm like with four mbt domains 1	Epigenetic regulator	24	0.736	0.385	0.93588	0.01		1	1	0	2012	2012
Conventional (Clear Cell) Renal Cell Carcinoma	C0279702	HIKESHI	51501	Q53FT3	heat shock protein nuclear import factor hikeshi		28	0.751	0.385	0.52459	0.01		1	1	0	2017	2017
Conventional (Clear Cell) Renal Cell Carcinoma	C0279702	SIRT6	51548	Q8N6T7	sirtuin 6	Epigenetic regulator	195	0.496	0.846	0.039119	0.01		1	1	0	2017	2017
Conventional (Clear Cell) Renal Cell Carcinoma	C0279702	PDGFRA	5156	P16234	platelet derived growth factor receptor alpha	Kinase	452	0.415	0.808	1	0.01		0	1	0	2012	2012
Conventional (Clear Cell) Renal Cell Carcinoma	C0279702	IL23A	51561	Q9NPF7	interleukin 23 subunit alpha	Signaling	427	0.415	0.846	0.35806	0.01		1	1	0	2019	2019
Conventional (Clear Cell) Renal Cell Carcinoma	C0279702	TRIM33	51592	Q9UPN9	tripartite motif containing 33		63	0.626	0.577	1	0.01		1	1	0	2017	2017
Conventional (Clear Cell) Renal Cell Carcinoma	C0279702	ATP5MC1	516	P05496	ATP synthase membrane subunit c locus 1		9	0.805	0.308	0.42691	0.01		1	1	0	2017	2017
Conventional (Clear Cell) Renal Cell Carcinoma	C0279702	PDK3	5165	Q15120	pyruvate dehydrogenase kinase 3	Kinase	51	0.678	0.5	0.44547	0.01		1	1	0	2018	2018
Conventional (Clear Cell) Renal Cell Carcinoma	C0279702	NUB1	51667	Q9Y5A7	negative regulator of ubiquitin like proteins 1		11	0.792	0.308	0.00039037	0.01		1	1	0	2010	2010
Conventional (Clear Cell) Renal Cell Carcinoma	C0279702	ENPP3	5169	O14638	ectonucleotide pyrophosphatase/phosphodiesterase 3	Enzyme	41	0.663	0.538	3.468e-23	0.01		1	1	0	2016	2016
Conventional (Clear Cell) Renal Cell Carcinoma	C0279702	ATP5MC2	517	Q06055	ATP synthase membrane subunit c locus 2		9	0.861	0.192	7.4577e-06	0.01		1	1	0	2011	2011
Conventional (Clear Cell) Renal Cell Carcinoma	C0279702	RAB23	51715	Q9ULC3	RAB23, member RAS oncogene family		144	0.541	0.654	0.0056143	0.01		1	1	0	2018	2018
Conventional (Clear Cell) Renal Cell Carcinoma	C0279702	WWOX	51741	Q9NZC7	WW domain containing oxidoreductase	Enzyme	356	0.453	0.808	1.2376e-15	0.01		1	1	0	2013	2013
Conventional (Clear Cell) Renal Cell Carcinoma	C0279702	RSF1	51773	Q96T23	remodeling and spacing factor 1	Enzyme	46	0.647	0.423	1	0.01		1	1	0	2018	2018
Conventional (Clear Cell) Renal Cell Carcinoma	C0279702	PGR	5241	P06401	progesterone receptor	Nuclear receptor	392	0.426	0.885	0.051042	0.01		1	1	0	2018	2018
Conventional (Clear Cell) Renal Cell Carcinoma	C0279702	PHF2	5253	O75151	PHD finger protein 2		27	0.711	0.423	1	0.01		1	1	0	2018	2018
Conventional (Clear Cell) Renal Cell Carcinoma	C0279702	SERPINA1	5265	P01009	serpin family A member 1	Enzyme modulator	482	0.41	0.923	6.8497e-08	0.01		1	1	0	2018	2018
Conventional (Clear Cell) Renal Cell Carcinoma	C0279702	PIK3R2	5296	O00459	phosphoinositide-3-kinase regulatory subunit 2	Enzyme modulator	120	0.551	0.808	0.016273	0.01		1	1	0	2018	2018
Conventional (Clear Cell) Renal Cell Carcinoma	C0279702	PIN1	5300	Q13526	peptidylprolyl cis/trans isomerase, NIMA-interacting 1		212	0.488	0.769	0.74031	0.01		1	1	0	2011	2011
Conventional (Clear Cell) Renal Cell Carcinoma	C0279702	PIP	5304	P12273	prolactin induced protein		109	0.556	0.808	0.00068286	0.01		1	1	0	2013	2013
Conventional (Clear Cell) Renal Cell Carcinoma	C0279702	PITX1	5307	P78337	paired like homeodomain 1		109	0.561	0.654	0.88244	0.01		1	1	0	2017	2017
Conventional (Clear Cell) Renal Cell Carcinoma	C0279702	PITX2	5308	Q99697	paired like homeodomain 2		248	0.489	0.808	0.97618	0.01		1	1	0	2019	2019
Conventional (Clear Cell) Renal Cell Carcinoma	C0279702	PLAGL1	5325	Q9UM63	PLAG1 like zinc finger 1		130	0.566	0.769	0.9764	0.01		1	1	0	2016	2016
Conventional (Clear Cell) Renal Cell Carcinoma	C0279702	PLAUR	5329	Q03405	plasminogen activator, urokinase receptor		147	0.536	0.731	0.0053378	0.01		1	1	0	2005	2005
Conventional (Clear Cell) Renal Cell Carcinoma	C0279702	PLCL1	5334	Q15111	phospholipase C like 1 (inactive)	Enzyme	69	0.608	0.654	0.012059	0.01		1	1	0	2014	2014
Conventional (Clear Cell) Renal Cell Carcinoma	C0279702	IL17D	53342	Q8TAD2	interleukin 17D		259	0.464	0.808	0.19796	0.01		1	1	0	2015	2015
Conventional (Clear Cell) Renal Cell Carcinoma	C0279702	PLD1	5337	Q13393	phospholipase D1		104	0.576	0.731	4.7758e-21	0.01		1	1	0	2018	2018
Conventional (Clear Cell) Renal Cell Carcinoma	C0279702	PLD2	5338	O14939	phospholipase D2		75	0.617	0.654	4.1429e-27	0.01		1	1	0	2018	2018
Conventional (Clear Cell) Renal Cell Carcinoma	C0279702	PLOD1	5351	Q02809	procollagen-lysine,2-oxoglutarate 5-dioxygenase 1	Enzyme	123	0.579	0.731	1.4837e-15	0.01		1	1	0	2019	2019
Conventional (Clear Cell) Renal Cell Carcinoma	C0279702	PLOD2	5352	O00469	procollagen-lysine,2-oxoglutarate 5-dioxygenase 2	Enzyme	114	0.559	0.654	6.6965e-08	0.01		1	1	0	2016	2016
Conventional (Clear Cell) Renal Cell Carcinoma	C0279702	PMAIP1	5366	Q13794	phorbol-12-myristate-13-acetate-induced protein 1		109	0.559	0.808	0.11182	0.01		1	1	0	2017	2017
Conventional (Clear Cell) Renal Cell Carcinoma	C0279702	IL20RB	53833	Q6UXL0	interleukin 20 receptor subunit beta	Receptor	12	0.769	0.346	3.6539e-08	0.01		1	1	0	2019	2019
Conventional (Clear Cell) Renal Cell Carcinoma	C0279702	CDHR5	53841	Q9HBB8	cadherin related family member 5		18	0.729	0.423	7.7447e-19	0.01		1	1	0	2017	2017
Conventional (Clear Cell) Renal Cell Carcinoma	C0279702	PRRX1	5396	P54821	paired related homeobox 1		134	0.543	0.769	0.24291	0.01		1	1	0	2019	2019
Conventional (Clear Cell) Renal Cell Carcinoma	C0279702	TREM2	54209	Q9NZC2	triggering receptor expressed on myeloid cells 2		239	0.519	0.769	3.2892e-09	0.01		1	1	0	2016	2016
Conventional (Clear Cell) Renal Cell Carcinoma	C0279702	SOX18	54345	P35713	SRY-box transcription factor 18	Transcription factor	112	0.578	0.692	0.15103	0.01		1	1	0	2019	2019
Conventional (Clear Cell) Renal Cell Carcinoma	C0279702	GFOD1	54438	Q9NXC2	glucose-fructose oxidoreductase domain containing 1	Enzyme	2	0.931	0.192	0.053666	0.01		1	1	0	2016	2016
Conventional (Clear Cell) Renal Cell Carcinoma	C0279702	PON1	5444	P27169	paraoxonase 1		496	0.409	0.885	9.8142e-11	0.01		1	1	0	2019	2019
Conventional (Clear Cell) Renal Cell Carcinoma	C0279702	KRT20	54474	P35900	keratin 20		559	0.388	0.846	9.0776e-11	0.01		1	1	0	2018	2018
Conventional (Clear Cell) Renal Cell Carcinoma	C0279702	POU3F2	5454	P20265	POU class 3 homeobox 2		40	0.7	0.423	0.92007	0.01		1	1	0	2011	2011
Conventional (Clear Cell) Renal Cell Carcinoma	C0279702	DDIT4	54541	Q9NX09	DNA damage inducible transcript 4		92	0.576	0.769	0.00068309	0.01		1	1	0	2018	2018
Conventional (Clear Cell) Renal Cell Carcinoma	C0279702	UGT1A1	54658	P22309	UDP glucuronosyltransferase family 1 member A1		302	0.464	0.769	3.2577e-06	0.01		1	1	0	2018	2018
Conventional (Clear Cell) Renal Cell Carcinoma	C0279702	TMED9	54732	Q9BVK6	transmembrane p24 trafficking protein 9	Transporter	42	0.666	0.538	0.0059542	0.01		1	1	0	1996	1996
Conventional (Clear Cell) Renal Cell Carcinoma	C0279702	XAF1	54739	Q6GPH4	XIAP associated factor 1		83	0.587	0.769	6.8151e-12	0.01		1	1	0	2007	2007
Conventional (Clear Cell) Renal Cell Carcinoma	C0279702	PPP1R12C	54776	Q9BZL4	protein phosphatase 1 regulatory subunit 12C		53	0.626	0.654	0.086713	0.01		1	1	0	2018	2018
Conventional (Clear Cell) Renal Cell Carcinoma	C0279702	RNF111	54778	Q6ZNA4	ring finger protein 111		31	0.7	0.5	0.99987	0.01		1	1	0	2016	2016
Conventional (Clear Cell) Renal Cell Carcinoma	C0279702	ERCC6L	54821	Q2NKX8	ERCC excision repair 6 like, spindle assembly checkpoint helicase		20	0.743	0.385	0.99932	0.01		1	1	0	2019	2019
Conventional (Clear Cell) Renal Cell Carcinoma	C0279702	ANKHD1	54882	Q8IWZ3	ankyrin repeat and KH domain containing 1		20	0.729	0.615	1	0.01		1	1	0	2018	2018
Conventional (Clear Cell) Renal Cell Carcinoma	C0279702	CASZ1	54897	Q86V15	castor zinc finger 1	Transcription factor	132	0.553	0.731	1	0.01		1	1	0	2019	2019
Conventional (Clear Cell) Renal Cell Carcinoma	C0279702	CMTM6	54918	Q9NX76	CKLF like MARVEL transmembrane domain containing 6		18	0.78	0.192	0.43302	0.01		1	1	0	2019	2019
Conventional (Clear Cell) Renal Cell Carcinoma	C0279702	SARS2	54938	Q9NP81	seryl-tRNA synthetase 2, mitochondrial	Enzyme	117	0.57	0.692	9.77e-10	0.01		1	1	0	2018	2018
Conventional (Clear Cell) Renal Cell Carcinoma	C0279702	RNF125	54941	Q96EQ8	ring finger protein 125		57	0.647	0.654	4.6358e-05	0.01		1	1	0	2016	2016
Conventional (Clear Cell) Renal Cell Carcinoma	C0279702	SDHAF2	54949	Q9NX18	succinate dehydrogenase complex assembly factor 2		85	0.604	0.692	2.8312e-06	0.01		1	1	0	2019	2019
Conventional (Clear Cell) Renal Cell Carcinoma	C0279702	PINX1	54984	Q96BK5	PIN2 (TERF1) interacting telomerase inhibitor 1	Enzyme modulator	88	0.587	0.692	4.5977e-09	0.01		1	1	0	2019	2019
Conventional (Clear Cell) Renal Cell Carcinoma	C0279702	OXR1	55074	Q8N573	oxidation resistance 1		21	0.78	0.462	0.84148	0.01		1	1	0	2017	2017
Conventional (Clear Cell) Renal Cell Carcinoma	C0279702	TMEM45A	55076	Q9NWC5	transmembrane protein 45A		20	0.736	0.308	0.0047645	0.01		1	1	0	2019	2019
Conventional (Clear Cell) Renal Cell Carcinoma	C0279702	AVP	551	P01185	arginine vasopressin	Signaling	454	0.437	0.846	0.074413	0.01		1	1	0	2018	2018
Conventional (Clear Cell) Renal Cell Carcinoma	C0279702	PACC1	55248	Q9H813	proton activated chloride channel 1		100	0.565	0.731	5.4081e-10	0.01		1	1	0	2001	2001
Conventional (Clear Cell) Renal Cell Carcinoma	C0279702	IMP3	55272	Q9NV31	IMP U3 small nucleolar ribonucleoprotein 3	Nucleic acid binding	97	0.566	0.462	1.5469e-07	0.01		1	1	0	2019	2019
Conventional (Clear Cell) Renal Cell Carcinoma	C0279702	RNF121	55298	Q9H920	ring finger protein 121	Enzyme	6	0.89	0.154	0.31902	0.01		1	1	0	2018	2018
Conventional (Clear Cell) Renal Cell Carcinoma	C0279702	PPP3CA	5530	Q08209	protein phosphatase 3 catalytic subunit alpha		149	0.568	0.769	0.99988	0.01		1	1	0	2017	2017
Conventional (Clear Cell) Renal Cell Carcinoma	C0279702	LAPTM4B	55353	Q86VI4	lysosomal protein transmembrane 4 beta	Transporter	88	0.579	0.692	4.2764e-13	0.01		1	1	0	2018	2018
Conventional (Clear Cell) Renal Cell Carcinoma	C0279702	HJURP	55355	Q8NCD3	Holliday junction recognition protein		33	0.691	0.269	2.0485e-07	0.01		1	1	0	2019	2019
Conventional (Clear Cell) Renal Cell Carcinoma	C0279702	H4C15	554313	P62805	H4 clustered histone 15		121	0.541	0.692		0.01		1	1	0	2010	2010
Conventional (Clear Cell) Renal Cell Carcinoma	C0279702	PRF1	5551	P14222	perforin 1		163	0.54	0.692	5.4875e-06	0.01		1	1	0	2019	2019
Conventional (Clear Cell) Renal Cell Carcinoma	C0279702	SAGE1	55511	Q9NXZ1	sarcoma antigen 1	Enzyme	78	0.588	0.654	8.5732e-18	0.01		1	1	0	2015	2015
Conventional (Clear Cell) Renal Cell Carcinoma	C0279702	KCNQ1DN	55539	Q9H478	KCNQ1 downstream neighbor		4	0.931	0.115		0.01		1	1	0	2019	2019
Conventional (Clear Cell) Renal Cell Carcinoma	C0279702	RBM38	55544	Q9H0Z9	RNA binding motif protein 38		37	0.67	0.5	0.71583	0.01		1	1	0	2017	2017
Conventional (Clear Cell) Renal Cell Carcinoma	C0279702	SUPT20H	55578	Q8NEM7	SPT20 homolog, SAGA complex component	Transcription factor	18	0.751	0.346	2.7313e-14	0.01		1	1	0	2005	2005
Conventional (Clear Cell) Renal Cell Carcinoma	C0279702	SMPD4	55627	Q9NXE4	sphingomyelin phosphodiesterase 4		5	0.861	0.308	1.7125e-19	0.01		1	1	0	2017	2017
Conventional (Clear Cell) Renal Cell Carcinoma	C0279702	PNRC2	55629	Q9NPJ4	proline rich nuclear receptor coactivator 2		4	0.89	0.115	0.33763	0.01		1	1	0	2019	2019
Conventional (Clear Cell) Renal Cell Carcinoma	C0279702	NLRP2	55655	Q9NX02	NLR family pyrin domain containing 2		155	0.515	0.731	1.4201e-38	0.01		1	1	0	2015	2015
Conventional (Clear Cell) Renal Cell Carcinoma	C0279702	DOK4	55715	Q8TEW6	docking protein 4		8	0.805	0.154	0.091531	0.01		1	1	0	2007	2007
Conventional (Clear Cell) Renal Cell Carcinoma	C0279702	ASF1B	55723	Q9NVP2	anti-silencing function 1B histone chaperone	Nucleic acid binding	12	0.769	0.269	6.3325e-05	0.01		1	1	0	2019	2019
Conventional (Clear Cell) Renal Cell Carcinoma	C0279702	PRKAR1A	5573	P10644	protein kinase cAMP-dependent type I regulatory subunit alpha		597	0.401	0.846	0.99985	0.01		1	1	0	2017	2017
Conventional (Clear Cell) Renal Cell Carcinoma	C0279702	CCAR1	55749	Q8IX12	cell division cycle and apoptosis regulator 1	Calcium-binding protein	38	0.663	0.385	0.99999	0.01		1	1	0	2017	2017
Conventional (Clear Cell) Renal Cell Carcinoma	C0279702	PRKCE	5581	Q02156	protein kinase C epsilon	Kinase	112	0.597	0.692	0.99988	0.01		1	1	0	2011	2011
Conventional (Clear Cell) Renal Cell Carcinoma	C0279702	PAG1	55824	Q9NWQ8	phosphoprotein membrane anchor with glycosphingolipid microdomains 1		174	0.505	0.808	0.017764	0.01		1	1	0	2009	2009
Conventional (Clear Cell) Renal Cell Carcinoma	C0279702	GABRQ	55879	Q9UN88	gamma-aminobutyric acid type A receptor subunit theta	Ion channel	21	0.722	0.5	0.0042977	0.01		1	1	0	2019	2019
Conventional (Clear Cell) Renal Cell Carcinoma	C0279702	ZNF395	55893	Q9H8N7	zinc finger protein 395	Transcription factor	42	0.666	0.577	0.30888	0.01		1	1	0	2017	2017
Conventional (Clear Cell) Renal Cell Carcinoma	C0279702	PRKCZ	5590	Q05513	protein kinase C zeta	Kinase	88	0.604	0.654	0.541	0.01		1	1	0	2012	2012
Conventional (Clear Cell) Renal Cell Carcinoma	C0279702	PRKDC	5591	P78527	protein kinase, DNA-activated, catalytic subunit	Kinase	131	0.54	0.808	1	0.01		1	1	1	2016	2016
Conventional (Clear Cell) Renal Cell Carcinoma	C0279702	SULF2	55959	Q8IWU5	sulfatase 2	Enzyme	75	0.603	0.615	0.010585	0.01		1	1	0	2016	2016
Conventional (Clear Cell) Renal Cell Carcinoma	C0279702	MYDGF	56005	Q969H8	myeloid derived growth factor		295	0.451	0.846	3.4923e-06	0.01		1	1	0	2015	2015
Conventional (Clear Cell) Renal Cell Carcinoma	C0279702	MAPK9	5601	P45984	mitogen-activated protein kinase 9	Kinase	115	0.561	0.731	0.069738	0.01		1	1	0	2014	2014
Conventional (Clear Cell) Renal Cell Carcinoma	C0279702	PDGFC	56034	Q9NRA1	platelet derived growth factor C	Signaling	69	0.621	0.692	0.99374	0.01		1	1	0	2008	2008
Conventional (Clear Cell) Renal Cell Carcinoma	C0279702	SUSD2	56241	Q9UGT4	sushi domain containing 2		26	0.711	0.385	1.8144e-21	0.01		1	1	0	2016	2016
Conventional (Clear Cell) Renal Cell Carcinoma	C0279702	PARD3	56288	Q8TEW0	par-3 family cell polarity regulator		68	0.608	0.615	0.95577	0.01		1	1	0	2017	2017
Conventional (Clear Cell) Renal Cell Carcinoma	C0279702	TRPV5	56302	Q9NQA5	transient receptor potential cation channel subfamily V member 5	Ion channel	41	0.663	0.538	2.6365e-14	0.01		1	1	0	2018	2018
Conventional (Clear Cell) Renal Cell Carcinoma	C0279702	METTL3	56339	Q86U44	methyltransferase like 3		79	0.585	0.538	1.799e-07	0.01		1	1	0	2017	2017
Conventional (Clear Cell) Renal Cell Carcinoma	C0279702	PPAN	56342	Q9NQ55	peter pan homolog		18	0.729	0.577	1.7244e-12	0.01		1	1	0	2019	2019
Conventional (Clear Cell) Renal Cell Carcinoma	C0279702	KLK7	5650	P49862	kallikrein related peptidase 7	Enzyme	62	0.61	0.615	0.0006467	0.01		1	1	0	2010	2010
Conventional (Clear Cell) Renal Cell Carcinoma	C0279702	KLK10	5655	O43240	kallikrein related peptidase 10	Enzyme	70	0.608	0.538	4.3662e-07	0.01		1	1	0	2010	2010
Conventional (Clear Cell) Renal Cell Carcinoma	C0279702	PRTN3	5657	P24158	proteinase 3	Enzyme	215	0.503	0.808	3.8044e-05	0.01		1	1	0	2020	2020
Conventional (Clear Cell) Renal Cell Carcinoma	C0279702	AZU1	566	P20160	azurocidin 1	Enzyme	56	0.636	0.692	3.9068e-05	0.01		1	1	0	2018	2018
Conventional (Clear Cell) Renal Cell Carcinoma	C0279702	DIABLO	56616	Q9NR28	diablo IAP-binding mitochondrial protein		108	0.555	0.692	2.5722e-06	0.01		1	1	0	2005	2005
Conventional (Clear Cell) Renal Cell Carcinoma	C0279702	PSEN1	5663	P49768	presenilin 1	Enzyme	369	0.469	0.846	0.97322	0.01		1	1	0	2002	2002
Conventional (Clear Cell) Renal Cell Carcinoma	C0279702	TWNK	56652	Q96RR1	twinkle mtDNA helicase	Enzyme	245	0.516	0.692	0.0032311	0.01		1	1	0	2014	2014
Conventional (Clear Cell) Renal Cell Carcinoma	C0279702	PANX2	56666	Q96RD6	pannexin 2	Ion channel	14	0.736	0.5	4.4188e-06	0.01		1	1	0	2019	2019
Conventional (Clear Cell) Renal Cell Carcinoma	C0279702	PNO1	56902	Q9NRX1	partner of NOB1 homolog		99	0.564	0.615	0.22652	0.01		1	1	0	2010	2010
Conventional (Clear Cell) Renal Cell Carcinoma	C0279702	PSMB6	5694	P28072	proteasome 20S subunit beta 6		100	0.561	0.731	0.015779	0.01		1	1	0	1994	1994
Conventional (Clear Cell) Renal Cell Carcinoma	C0279702	FAM20C	56975	Q8IXL6	FAM20C golgi associated secretory pathway kinase		116	0.578	0.731	0.31465	0.01		1	1	0	2013	2013
Conventional (Clear Cell) Renal Cell Carcinoma	C0279702	PRDM9	56979	Q9NQV7	PR/SET domain 9		27	0.686	0.5	4.8301e-27	0.01		1	1	0	2017	2017
Conventional (Clear Cell) Renal Cell Carcinoma	C0279702	CHPT1	56994	Q8WUD6	choline phosphotransferase 1	Enzyme	253	0.474	0.846	0.00024252	0.01		1	1	0	2017	2017
Conventional (Clear Cell) Renal Cell Carcinoma	C0279702	ADAMTS9	56999	Q9P2N4	ADAM metallopeptidase with thrombospondin type 1 motif 9	Enzyme	53	0.633	0.692	1.0004e-06	0.01		1	1	0	2019	2019
Conventional (Clear Cell) Renal Cell Carcinoma	C0279702	CIAPIN1	57019	Q6FI81	cytokine induced apoptosis inhibitor 1		33	0.691	0.385	0.0019035	0.01		1	1	0	2009	2009
Conventional (Clear Cell) Renal Cell Carcinoma	C0279702	TIGAR	57103	Q9NQ88	TP53 induced glycolysis regulatory phosphatase		71	0.599	0.692	0.7348	0.01		1	1	0	2017	2017
Conventional (Clear Cell) Renal Cell Carcinoma	C0279702	CHMP1B	57132	Q7LBR1	charged multivesicular body protein 1B	Transporter	24	0.736	0.462	0.73182	0.01		1	1	0	2014	2014
Conventional (Clear Cell) Renal Cell Carcinoma	C0279702	MAN1C1	57134	Q9NR34	mannosidase alpha class 1C member 1	Chaperone	11	0.805	0.308	0.20933	0.01		1	1	0	2018	2018
Conventional (Clear Cell) Renal Cell Carcinoma	C0279702	RTN4	57142	Q9NQC3	reticulon 4		71	0.621	0.692	0.45318	0.01		1	1	1	2018	2018
Conventional (Clear Cell) Renal Cell Carcinoma	C0279702	SMURF1	57154	Q9HCE7	SMAD specific E3 ubiquitin protein ligase 1	Enzyme	70	0.595	0.615	0.6118	0.01		1	1	0	2017	2017
Conventional (Clear Cell) Renal Cell Carcinoma	C0279702	PSMD10	5716	O75832	proteasome 26S subunit, non-ATPase 10		116	0.552	0.808	0.50136	0.01		1	1	0	2019	2019
Conventional (Clear Cell) Renal Cell Carcinoma	C0279702	ZMIZ1	57178	Q9ULJ6	zinc finger MIZ-type containing 1		96	0.588	0.615	0.99937	0.01		1	1	0	2019	2019
Conventional (Clear Cell) Renal Cell Carcinoma	C0279702	SLC39A10	57181	Q9ULF5	solute carrier family 39 member 10	Transporter	18	0.78	0.231	0.9927	0.01		1	1	0	2014	2014
Conventional (Clear Cell) Renal Cell Carcinoma	C0279702	CEMIP	57214	Q8WUJ3	cell migration inducing hyaluronidase 1		64	0.617	0.615	4.4023e-17	0.01		1	1	0	2006	2006
Conventional (Clear Cell) Renal Cell Carcinoma	C0279702	PTCH1	5727	Q13635	patched 1		604	0.398	0.885	1	0.01		0	1	0	2002	2002
Conventional (Clear Cell) Renal Cell Carcinoma	C0279702	DANCR	57291	P0C864	differentiation antagonizing non-protein coding RNA		65	0.601	0.615		0.01		1	1	0	2017	2017
Conventional (Clear Cell) Renal Cell Carcinoma	C0279702	PTGER4	5734	P35408	prostaglandin E receptor 4	G-protein coupled receptor	120	0.558	0.731	0.9755	0.01		1	1	0	2011	2011
Conventional (Clear Cell) Renal Cell Carcinoma	C0279702	CLTRN	57393	Q9HBJ8	collectrin, amino acid transport regulator		10	0.839	0.269	0.00011309	0.01		1	1	0	2016	2016
Conventional (Clear Cell) Renal Cell Carcinoma	C0279702	RAB22A	57403	Q9UL26	RAB22A, member RAS oncogene family		35	0.663	0.346	0.10273	0.01		1	1	0	2016	2016
Conventional (Clear Cell) Renal Cell Carcinoma	C0279702	MIR362	574030		microRNA 362		47	0.641	0.423		0.01		1	1	0	2016	2016
Conventional (Clear Cell) Renal Cell Carcinoma	C0279702	MIR20B	574032		microRNA 20b		84	0.581	0.615		0.01		1	1	0	2016	2016
Conventional (Clear Cell) Renal Cell Carcinoma	C0279702	SCYL1	57410	Q96KG9	SCY1 like pseudokinase 1	Kinase	104	0.582	0.769	2.5187e-08	0.01		1	1	0	1996	1996
Conventional (Clear Cell) Renal Cell Carcinoma	C0279702	PTGS1	5742	P23219	prostaglandin-endoperoxide synthase 1	Enzyme	318	0.46	0.885	6.2425e-07	0.01		1	1	0	2013	2013
Conventional (Clear Cell) Renal Cell Carcinoma	C0279702	MIR409	574413		microRNA 409		88	0.57	0.731		0.01		1	1	0	2019	2019
Conventional (Clear Cell) Renal Cell Carcinoma	C0279702	MIR488	574441		microRNA 488		46	0.633	0.692		0.01		1	1	0	2018	2018
Conventional (Clear Cell) Renal Cell Carcinoma	C0279702	MIR146B	574447		microRNA 146b		187	0.496	0.769		0.01		1	1	0	2018	2018
Conventional (Clear Cell) Renal Cell Carcinoma	C0279702	MIR492	574449		microRNA 492		33	0.678	0.346		0.01		1	1	0	2015	2015
Conventional (Clear Cell) Renal Cell Carcinoma	C0279702	MIR495	574453		microRNA 495		87	0.573	0.654		0.01		1	1	0	2017	2017
Conventional (Clear Cell) Renal Cell Carcinoma	C0279702	MIR193B	574455		microRNA 193b		117	0.536	0.808		0.01		1	1	0	2019	2019
Conventional (Clear Cell) Renal Cell Carcinoma	C0279702	MIR498	574460		microRNA 498		49	0.633	0.5		0.01		1	1	0	2018	2018
Conventional (Clear Cell) Renal Cell Carcinoma	C0279702	MIR501	574503		microRNA 501		38	0.663	0.462		0.01		1	1	0	2018	2018
Conventional (Clear Cell) Renal Cell Carcinoma	C0279702	MIR502	574504		microRNA 502		42	0.641	0.538		0.01		1	1	0	2017	2017
Conventional (Clear Cell) Renal Cell Carcinoma	C0279702	MIR505	574508		microRNA 505		65	0.603	0.577		0.01		1	1	0	2019	2019
Conventional (Clear Cell) Renal Cell Carcinoma	C0279702	MIR510	574515		microRNA 510		32	0.678	0.423		0.01		1	1	0	2015	2015
Conventional (Clear Cell) Renal Cell Carcinoma	C0279702	MTA3	57504	Q9BTC8	metastasis associated 1 family member 3	Nucleic acid binding	41	0.67	0.462	0.03435	0.01		1	1	0	2017	2017
Conventional (Clear Cell) Renal Cell Carcinoma	C0279702	SEMA6A	57556	Q9H2E6	semaphorin 6A	Signaling	211	0.486	0.808	0.99976	0.01		1	1	0	2019	2019
Conventional (Clear Cell) Renal Cell Carcinoma	C0279702	ARRDC3	57561	Q96B67	arrestin domain containing 3		24	0.711	0.308	0.98715	0.01		1	1	0	2018	2018
Conventional (Clear Cell) Renal Cell Carcinoma	C0279702	FNIP2	57600	Q9P278	folliculin interacting protein 2		15	0.76	0.231	1	0.01		1	1	0	2008	2008
Conventional (Clear Cell) Renal Cell Carcinoma	C0279702	ERV3-2	57612		endogenous retrovirus group 3 member 2		2	1	0.115		0.01		1	1	0	2018	2018
Conventional (Clear Cell) Renal Cell Carcinoma	C0279702	ZNF492	57615	Q9P255	zinc finger protein 492		2	1	0.115	0.18998	0.01		1	1	0	2019	2019
Conventional (Clear Cell) Renal Cell Carcinoma	C0279702	EP400	57634	Q96L91	E1A binding protein p400		22	0.751	0.385	1	0.01		1	1	0	2013	2013
Conventional (Clear Cell) Renal Cell Carcinoma	C0279702	TRIB3	57761	Q96RU7	tribbles pseudokinase 3	Kinase	104	0.573	0.692	1.1597e-13	0.01		1	1	0	2019	2019
Conventional (Clear Cell) Renal Cell Carcinoma	C0279702	PTPN6	5777	P29350	protein tyrosine phosphatase non-receptor type 6		218	0.485	0.769	0.99999	0.01		1	1	0	2017	2017
Conventional (Clear Cell) Renal Cell Carcinoma	C0279702	HES4	57801	Q9HCC6	hes family bHLH transcription factor 4	Transcription factor	15	0.743	0.231	1.3746e-05	0.01		1	1	0	2017	2017
Conventional (Clear Cell) Renal Cell Carcinoma	C0279702	HAMP	57817	P81172	hepcidin antimicrobial peptide		377	0.433	0.846	0.0081797	0.01		1	1	0	2019	2019
Conventional (Clear Cell) Renal Cell Carcinoma	C0279702	PTPRC	5788	P08575	protein tyrosine phosphatase receptor type C	Enzyme	366	0.435	0.808	1	0.01		1	1	0	2016	2016
Conventional (Clear Cell) Renal Cell Carcinoma	C0279702	PTPRD	5789	P23468	protein tyrosine phosphatase receptor type D	Enzyme	93	0.584	0.731	1	0.01		1	1	1	2013	2013
Conventional (Clear Cell) Renal Cell Carcinoma	C0279702	PTPRZ1	5803	P23471	protein tyrosine phosphatase receptor type Z1	Enzyme	61	0.623	0.615	0.98997	0.01		1	1	0	2013	2013
Conventional (Clear Cell) Renal Cell Carcinoma	C0279702	NFE4	58160	Q86UQ8	nuclear factor, erythroid 4		1	1	0.115		0.01		1	1	0	2019	2019
Conventional (Clear Cell) Renal Cell Carcinoma	C0279702	CTDSP1	58190	Q9GZU7	CTD small phosphatase 1		25	0.711	0.577	0.99254	0.01		1	1	0	2014	2014
Conventional (Clear Cell) Renal Cell Carcinoma	C0279702	BBS2	583	Q9BXC9	Bardet-Biedl syndrome 2		128	0.565	0.654	1.0328e-17	0.01		1	1	0	1999	1999
Conventional (Clear Cell) Renal Cell Carcinoma	C0279702	PYCR1	5831	P32322	pyrroline-5-carboxylate reductase 1		126	0.57	0.654	0.00019947	0.01		1	1	0	2019	2019
Conventional (Clear Cell) Renal Cell Carcinoma	C0279702	LY6G6D	58530	O95868	lymphocyte antigen 6 family member G6D		11	0.805	0.385	0.032554	0.01		1	1	0	2014	2014
Conventional (Clear Cell) Renal Cell Carcinoma	C0279702	RAB27A	5873	P51159	RAB27A, member RAS oncogene family		108	0.585	0.692	3.0027e-07	0.01		1	1	0	2019	2019
Conventional (Clear Cell) Renal Cell Carcinoma	C0279702	RAB27B	5874	O00194	RAB27B, member RAS oncogene family		64	0.608	0.692	0.038714	0.01		1	1	0	2019	2019
Conventional (Clear Cell) Renal Cell Carcinoma	C0279702	RAC2	5880	P15153	Rac family small GTPase 2	Enzyme modulator	119	0.556	0.731	0.96627	0.01		1	1	0	2019	2019
Conventional (Clear Cell) Renal Cell Carcinoma	C0279702	RAG2	5897	P55895	recombination activating 2		207	0.507	0.769	0.020287	0.01		1	1	0	2014	2014
Conventional (Clear Cell) Renal Cell Carcinoma	C0279702	ACTA2	59	P62736	actin alpha 2, smooth muscle	Cellular structure	200	0.508	0.846	0.93017	0.01		1	1	0	2007	2007
Conventional (Clear Cell) Renal Cell Carcinoma	C0279702	RAP1B	5908	P61224	RAP1B, member of RAS oncogene family	Enzyme modulator	116	0.565	0.769	0.90995	0.01		1	1	0	2016	2016
Conventional (Clear Cell) Renal Cell Carcinoma	C0279702	RAP1GAP	5909	P47736	RAP1 GTPase activating protein	Enzyme modulator	63	0.626	0.5	0.84376	0.01		1	1	0	2012	2012
Conventional (Clear Cell) Renal Cell Carcinoma	C0279702	RAP2A	5911	P10114	RAP2A, member of RAS oncogene family	Enzyme modulator	19	0.751	0.538	0.85068	0.01		0	1	0	2017	2017
Conventional (Clear Cell) Renal Cell Carcinoma	C0279702	RAP2B	5912	P61225	RAP2B, member of RAS oncogene family	Enzyme modulator	45	0.644	0.462	0.48658	0.01		1	1	0	2017	2017
Conventional (Clear Cell) Renal Cell Carcinoma	C0279702	RARA	5914	P10276	retinoic acid receptor alpha	Nuclear receptor	274	0.47	0.846	0.96305	0.01		1	1	0	2014	2014
Conventional (Clear Cell) Renal Cell Carcinoma	C0279702	RARB	5915	P10826	retinoic acid receptor beta	Nuclear receptor	254	0.478	0.846	0.99983	0.01		1	1	0	2005	2005
Conventional (Clear Cell) Renal Cell Carcinoma	C0279702	RARRES1	5918	P49788	retinoic acid receptor responder 1	Enzyme modulator	53	0.628	0.385	2.6799e-09	0.01		1	1	0	2016	2016
Conventional (Clear Cell) Renal Cell Carcinoma	C0279702	RASA1	5921	P20936	RAS p21 protein activator 1	Enzyme modulator	237	0.481	0.885	1	0.01		1	1	0	2016	2016
Conventional (Clear Cell) Renal Cell Carcinoma	C0279702	RB1	5925	P06400	RB transcriptional corepressor 1	Nucleic acid binding	339	0.444	0.885	1	0.01		1	1	0	2018	2018
Conventional (Clear Cell) Renal Cell Carcinoma	C0279702	HIVEP3	59269	Q5T1R4	HIVEP zinc finger 3		31	0.722	0.462	0.90584	0.01		1	1	0	2004	2004
Conventional (Clear Cell) Renal Cell Carcinoma	C0279702	KDM5A	5927	P29375	lysine demethylase 5A		69	0.597	0.731	1	0.01		1	1	0	2019	2019
Conventional (Clear Cell) Renal Cell Carcinoma	C0279702	ACE2	59272	Q9BYF1	angiotensin I converting enzyme 2	Enzyme	253	0.477	0.769	0.99769	0.01		1	1	0	2017	2017
Conventional (Clear Cell) Renal Cell Carcinoma	C0279702	SCPEP1	59342	Q9HB40	serine carboxypeptidase 1	Enzyme	36	0.674	0.615	1.2284e-13	0.01		1	1	0	2014	2014
Conventional (Clear Cell) Renal Cell Carcinoma	C0279702	LGR6	59352	Q9HBX8	leucine rich repeat containing G protein-coupled receptor 6	G-protein coupled receptor	209	0.502	0.923	2.9439e-06	0.01		1	1	0	2013	2013
Conventional (Clear Cell) Renal Cell Carcinoma	C0279702	RBP1	5947	P09455	retinol binding protein 1		103	0.565	0.731	5.9233e-06	0.01		1	1	0	2005	2005
Conventional (Clear Cell) Renal Cell Carcinoma	C0279702	RBP2	5948	P50120	retinol binding protein 2		60	0.615	0.615	0.22089	0.01		1	1	0	2005	2005
Conventional (Clear Cell) Renal Cell Carcinoma	C0279702	RBP4	5950	P02753	retinol binding protein 4	Transporter	217	0.493	0.808	0.51951	0.01		1	1	0	2017	2017
Conventional (Clear Cell) Renal Cell Carcinoma	C0279702	RCVRN	5957	P35243	recoverin		19	0.729	0.423	1.7064e-09	0.01		1	1	0	2016	2016
Conventional (Clear Cell) Renal Cell Carcinoma	C0279702	BCL2A1	597	Q16548	BCL2 related protein A1	Signaling	150	0.529	0.731	0.20785	0.01		1	1	0	2018	2018
Conventional (Clear Cell) Renal Cell Carcinoma	C0279702	RET	5979	P07949	ret proto-oncogene	Kinase	607	0.392	0.885	1	0.01		1	1	0	2019	2019
Conventional (Clear Cell) Renal Cell Carcinoma	C0279702	RHEB	6009	Q15382	Ras homolog, mTORC1 binding	Enzyme modulator	53	0.631	0.577	0.98119	0.01		1	1	0	2015	2015
Conventional (Clear Cell) Renal Cell Carcinoma	C0279702	RHO	6010	P08100	rhodopsin	G-protein coupled receptor	178	0.525	0.769	0.00013108	0.01		1	1	0	2003	2003
Conventional (Clear Cell) Renal Cell Carcinoma	C0279702	RIT1	6016	Q92963	Ras like without CAAX 1	Enzyme modulator	184	0.527	0.808	0.13281	0.01		1	1	0	2019	2019
Conventional (Clear Cell) Renal Cell Carcinoma	C0279702	RNF2	6045	Q99496	ring finger protein 2		63	0.608	0.615	0.99743	0.01		1	1	0	2018	2018
Conventional (Clear Cell) Renal Cell Carcinoma	C0279702	BRD2	6046	P25440	bromodomain containing 2	Epigenetic regulator	303	0.45	0.808	0.99957	0.01		1	1	0	2012	2012
Conventional (Clear Cell) Renal Cell Carcinoma	C0279702	FKBP10	60681	Q96AY3	FKBP prolyl isomerase 10		86	0.606	0.538	2.3826e-06	0.01		1	1	0	2017	2017
Conventional (Clear Cell) Renal Cell Carcinoma	C0279702	SNORD15A	6079		small nucleolar RNA, C/D box 15A		41	0.653	0.577		0.01		1	1	0	2014	2014
Conventional (Clear Cell) Renal Cell Carcinoma	C0279702	ROS1	6098	P08922	ROS proto-oncogene 1, receptor tyrosine kinase	Kinase	356	0.439	0.885	1.6184e-72	0.01		1	1	0	2014	2014
Conventional (Clear Cell) Renal Cell Carcinoma	C0279702	OPN1SW	611	P03999	opsin 1, short wave sensitive	G-protein coupled receptor	164	0.519	0.769	0.021134	0.01		1	1	0	2018	2018
Conventional (Clear Cell) Renal Cell Carcinoma	C0279702	MIR455	619556		microRNA 455		92	0.559	0.769		0.01		1	1	0	2018	2018
Conventional (Clear Cell) Renal Cell Carcinoma	C0279702	RPS6KB1	6198	P23443	ribosomal protein S6 kinase B1	Kinase	169	0.511	0.731	0.97285	0.01		0	1	0	2019	2019
Conventional (Clear Cell) Renal Cell Carcinoma	C0279702	RPS15A	6210	P62244	ribosomal protein S15a	Nucleic acid binding	58	0.638	0.538	0.802	0.01		1	1	0	2019	2019
Conventional (Clear Cell) Renal Cell Carcinoma	C0279702	RRM2	6241	P31350	ribonucleotide reductase regulatory subunit M2	Enzyme	101	0.555	0.769	0.2964	0.01		1	1	0	2019	2019
Conventional (Clear Cell) Renal Cell Carcinoma	C0279702	RXRA	6256	P19793	retinoid X receptor alpha	Nuclear receptor	132	0.543	0.769	0.99852	0.01		1	1	0	2009	2009
Conventional (Clear Cell) Renal Cell Carcinoma	C0279702	RXRG	6258	P48443	retinoid X receptor gamma	Nuclear receptor	40	0.674	0.615	0.42421	0.01		1	1	0	2007	2007
Conventional (Clear Cell) Renal Cell Carcinoma	C0279702	BDNF	627	P23560	brain derived neurotrophic factor	Signaling	992	0.345	0.923	0.65626	0.01		1	1	0	2016	2016
Conventional (Clear Cell) Renal Cell Carcinoma	C0279702	S100A5	6276	P33763	S100 calcium binding protein A5	Calcium-binding protein	14	0.805	0.308	5.5111e-05	0.01		1	1	0	2002	2002
Conventional (Clear Cell) Renal Cell Carcinoma	C0279702	S100A12	6283	P80511	S100 calcium binding protein A12	Calcium-binding protein	221	0.488	0.846	0.48234	0.01		1	1	0	2014	2014
Conventional (Clear Cell) Renal Cell Carcinoma	C0279702	SAG	6295	P10523	S-antigen visual arrestin	Enzyme modulator	97	0.57	0.731	1.4921e-16	0.01		1	1	0	2019	2019
Conventional (Clear Cell) Renal Cell Carcinoma	C0279702	MAPK12	6300	P53778	mitogen-activated protein kinase 12	Kinase	34	0.695	0.346	5.8734e-07	0.01		1	1	0	2019	2019
Conventional (Clear Cell) Renal Cell Carcinoma	C0279702	BGLAP	632	P02818	bone gamma-carboxyglutamate protein		274	0.462	0.846	4.6155e-08	0.01		1	1	0	2010	2010
Conventional (Clear Cell) Renal Cell Carcinoma	C0279702	CEACAM1	634	P13688	CEA cell adhesion molecule 1		167	0.525	0.731	0.00078816	0.01		1	1	0	2004	2004
Conventional (Clear Cell) Renal Cell Carcinoma	C0279702	SRL	6345	Q86TD4	sarcalumenin	Enzyme modulator	77	0.597	0.731	8.0004e-08	0.01		1	1	0	2019	2019
Conventional (Clear Cell) Renal Cell Carcinoma	C0279702	CCL7	6354	P80098	C-C motif chemokine ligand 7	Signaling	124	0.548	0.846	0.00089294	0.01		1	1	0	2014	2014
Conventional (Clear Cell) Renal Cell Carcinoma	C0279702	CCL11	6356	P51671	C-C motif chemokine ligand 11	Signaling	250	0.473	0.885	0.010211	0.01		1	1	0	2005	2005
Conventional (Clear Cell) Renal Cell Carcinoma	C0279702	CCL17	6361	Q92583	C-C motif chemokine ligand 17	Signaling	162	0.518	0.808	0.00013932	0.01		1	1	0	2017	2017
Conventional (Clear Cell) Renal Cell Carcinoma	C0279702	CCL22	6367	O00626	C-C motif chemokine ligand 22	Signaling	182	0.5	0.846	0.0084014	0.01		1	1	0	2019	2019
Conventional (Clear Cell) Renal Cell Carcinoma	C0279702	CXCL11	6373	O14625	C-X-C motif chemokine ligand 11	Signaling	164	0.519	0.808	0.31408	0.01		1	1	0	2009	2009
Conventional (Clear Cell) Renal Cell Carcinoma	C0279702	CXCL5	6374	P42830	C-X-C motif chemokine ligand 5	Signaling	160	0.519	0.769	5.0431e-06	0.01		1	1	0	2016	2016
Conventional (Clear Cell) Renal Cell Carcinoma	C0279702	BIK	638	Q13323	BCL2 interacting killer		48	0.653	0.462	5.0334e-06	0.01		1	1	0	2006	2006
Conventional (Clear Cell) Renal Cell Carcinoma	C0279702	SELP	6403	P16109	selectin P		293	0.46	0.769	5.0448e-32	0.01		1	1	0	2017	2017
Conventional (Clear Cell) Renal Cell Carcinoma	C0279702	SEMG1	6406	P04279	semenogelin 1		54	0.628	0.615	0.35697	0.01		1	1	0	2014	2014
Conventional (Clear Cell) Renal Cell Carcinoma	C0279702	POTEM	641455	A6NI47	POTE ankyrin domain family member M		133	0.541	0.769	0.00031637	0.01		1	1	0	2019	2019
Conventional (Clear Cell) Renal Cell Carcinoma	C0279702	SELENOW	6415	P63302	selenoprotein W		18	0.736	0.462	0.00026801	0.01		1	1	0	2018	2018
Conventional (Clear Cell) Renal Cell Carcinoma	C0279702	SNHG6	641638		small nucleolar RNA host gene 6		51	0.633	0.423		0.01		1	1	0	2018	2018
Conventional (Clear Cell) Renal Cell Carcinoma	C0279702	ERAP2	64167	Q6P179	endoplasmic reticulum aminopeptidase 2	Enzyme	58	0.615	0.577	1.0028e-28	0.01		1	1	0	2013	2013
Conventional (Clear Cell) Renal Cell Carcinoma	C0279702	SFRP5	6425	Q5T4F7	secreted frizzled related protein 5		106	0.559	0.692	5.1843e-06	0.01		1	1	0	2006	2006
Conventional (Clear Cell) Renal Cell Carcinoma	C0279702	POU5F1P3	642559		POU class 5 homeobox 1 pseudogene 3		285	0.452	0.808		0.01		1	1	0	2016	2016
Conventional (Clear Cell) Renal Cell Carcinoma	C0279702	SRSF1	6426	Q07955	serine and arginine rich splicing factor 1	Nucleic acid binding	98	0.563	0.692	0.98268	0.01		1	1	0	2017	2017
Conventional (Clear Cell) Renal Cell Carcinoma	C0279702	CXCR5	643	P32302	C-X-C motif chemokine receptor 5	G-protein coupled receptor	146	0.524	0.769	0.72861	0.01		1	1	0	2018	2018
Conventional (Clear Cell) Renal Cell Carcinoma	C0279702	SMIM5	643008	Q71RC9	small integral membrane protein 5		1	1	0.115	0.13265	0.01		1	1	0	2014	2014
Conventional (Clear Cell) Renal Cell Carcinoma	C0279702	COP1	64326	Q8NHY2	COP1 E3 ubiquitin ligase		40	0.666	0.538	0.99994	0.01		1	1	0	2016	2016
Conventional (Clear Cell) Renal Cell Carcinoma	C0279702	HIF3A	64344	Q9Y2N7	hypoxia inducible factor 3 subunit alpha	Transcription factor	31	0.682	0.538	0.0015428	0.01		1	1	0	2007	2007
Conventional (Clear Cell) Renal Cell Carcinoma	C0279702	SGK1	6446	O00141	serum/glucocorticoid regulated kinase 1	Kinase	188	0.506	0.769	0.0023046	0.01		1	1	0	2007	2007
Conventional (Clear Cell) Renal Cell Carcinoma	C0279702	H3P16	644914		H3 histone pseudogene 16		23	0.705	0.346		0.01		1	1	0	2009	2009
Conventional (Clear Cell) Renal Cell Carcinoma	C0279702	PIK3CD-AS1	644997	Q5SR53	PIK3CD antisense RNA 1		6	0.89	0.154	0.029774	0.01		1	1	0	2018	2018
Conventional (Clear Cell) Renal Cell Carcinoma	C0279702	LINC00461	645323		long intergenic non-protein coding RNA 461		30	0.736	0.423		0.01		1	1	0	2019	2019
Conventional (Clear Cell) Renal Cell Carcinoma	C0279702	IGFL2-AS1	645553		IGFL2 antisense RNA 1		1	1	0.115		0.01		1	1	0	2019	2019
Conventional (Clear Cell) Renal Cell Carcinoma	C0279702	SH3GL2	6456	Q99962	SH3 domain containing GRB2 like 2, endophilin A1		37	0.659	0.5	0.00011862	0.01		1	1	0	2017	2017
Conventional (Clear Cell) Renal Cell Carcinoma	C0279702	POU5F1P4	645682		POU class 5 homeobox 1 pseudogene 4		284	0.452	0.808		0.01		1	1	0	2016	2016
Conventional (Clear Cell) Renal Cell Carcinoma	C0279702	BNC1	646	Q01954	basonuclin 1	Nucleic acid binding	21	0.736	0.423	0.96479	0.01		1	1	0	2010	2010
Conventional (Clear Cell) Renal Cell Carcinoma	C0279702	SHC1	6464	P29353	SHC adaptor protein 1	Signaling	80	0.597	0.538	0.0017351	0.01		1	1	0	2019	2019
Conventional (Clear Cell) Renal Cell Carcinoma	C0279702	MFSD14A	64645	Q96MC6	major facilitator superfamily domain containing 14A		2	1	0.115	0.97172	0.01		1	1	0	2017	2017
Conventional (Clear Cell) Renal Cell Carcinoma	C0279702	FBXW4	6468	P57775	F-box and WD repeat domain containing 4		52	0.633	0.577	0.00067616	0.01		1	1	0	2013	2013
Conventional (Clear Cell) Renal Cell Carcinoma	C0279702	SHH	6469	Q15465	sonic hedgehog signaling molecule		303	0.461	0.846	0.98258	0.01		1	1	0	2019	2019
Conventional (Clear Cell) Renal Cell Carcinoma	C0279702	COPS7B	64708	Q9H9Q2	COP9 signalosome subunit 7B		4	0.931	0.115	0.60071	0.01		1	1	0	2018	2018
Conventional (Clear Cell) Renal Cell Carcinoma	C0279702	SMURF2	64750	Q9HAU4	SMAD specific E3 ubiquitin protein ligase 2	Enzyme	59	0.623	0.615	0.87235	0.01		1	1	0	2010	2010
Conventional (Clear Cell) Renal Cell Carcinoma	C0279702	ATPAF1	64756	Q5TC12	ATP synthase mitochondrial F1 complex assembly factor 1	Chaperone	8	0.792	0.269	0.013464	0.01		1	1	0	2017	2017
Conventional (Clear Cell) Renal Cell Carcinoma	C0279702	TNS3	64759	Q68CZ2	tensin 3		50	0.653	0.615	1	0.01		1	1	0	2013	2013
Conventional (Clear Cell) Renal Cell Carcinoma	C0279702	DDX31	64794	Q9H8H2	DEAD-box helicase 31		12	0.78	0.115	1.9816e-12	0.01		1	1	0	2012	2012
Conventional (Clear Cell) Renal Cell Carcinoma	C0279702	BMI1	648	P35226	BMI1 proto-oncogene, polycomb ring finger		309	0.448	0.808	0.94286	0.01		1	1	0	2015	2015
Conventional (Clear Cell) Renal Cell Carcinoma	C0279702	ST3GAL2	6483	Q16842	ST3 beta-galactoside alpha-2,3-sialyltransferase 2		17	0.769	0.385	0.9417	0.01		1	1	0	2003	2003
Conventional (Clear Cell) Renal Cell Carcinoma	C0279702	USP46	64854	P62068	ubiquitin specific peptidase 46	Enzyme	16	0.769	0.192	0.79135	0.01		1	1	0	2019	2019
Conventional (Clear Cell) Renal Cell Carcinoma	C0279702	BMP1	649	P13497	bone morphogenetic protein 1		121	0.554	0.769	0.00088564	0.01		1	1	0	2019	2019
Conventional (Clear Cell) Renal Cell Carcinoma	C0279702	CENPH	64946	Q9H3R5	centromere protein H		26	0.705	0.308	1.5465e-07	0.01		1	1	0	2015	2015
Conventional (Clear Cell) Renal Cell Carcinoma	C0279702	MRPL41	64975	Q8IXM3	mitochondrial ribosomal protein L41	Nucleic acid binding	36	0.666	0.308	0.55531	0.01		1	1	0	2016	2016
Conventional (Clear Cell) Renal Cell Carcinoma	C0279702	ACD	65057	Q96AP0	ACD shelterin complex subunit and telomerase recruitment factor		96	0.603	0.731	1.1148e-12	0.01		1	1	0	2019	2019
Conventional (Clear Cell) Renal Cell Carcinoma	C0279702	SLC1A5	6510	Q15758	solute carrier family 1 member 5	Transporter	81	0.587	0.577	0.16869	0.01		1	1	0	2015	2015
[truncated: 347 more rows]

## Sheet: Renal Cell Carcinoma
Disease	Disease_id	Gene	Gene_id	UniProt	Gene_Full_Name	Protein_Class	N_diseases_g	DSI_g	DPI_g	pLI	Score_gda	EL_gda	EI_gda	N_PMIDs	N_SNPs_gda	First_Ref	Last_Ref
Renal Cell Carcinoma	C0007134	FLCN	201163	Q8NFG4	folliculin		160	0.537	0.885	0.78892	0.9	strong	0.92	25	5	2002	2020
Renal Cell Carcinoma	C0007134	EPAS1	2034	Q99814	endothelial PAS domain protein 1	Transcription factor	293	0.454	0.731	0.5961	0.7		0.974	38	20	2001	2019
Renal Cell Carcinoma	C0007134	PTEN	5728	P60484	phosphatase and tensin homolog	Enzyme	1349	0.305	0.923	0.25651	0.7		1	35	3	1998	2020
Renal Cell Carcinoma	C0007134	VHL	7428	P40337	von Hippel-Lindau tumor suppressor	Enzyme	372	0.443	0.846	0.079515	0.7	strong	0.97	236	15	1989	2019
Renal Cell Carcinoma	C0007134	OGG1	4968	O15527	8-oxoguanine DNA glycosylase		313	0.453	0.808	3.9314e-12	0.62		1	3	1	2003	2011
Renal Cell Carcinoma	C0007134	PTGS2	5743	P35354	prostaglandin-endoperoxide synthase 2	Enzyme	1234	0.314	0.962	0.99597	0.6		1	14	0	2002	2019
Renal Cell Carcinoma	C0007134	NF2	4771	P35240	neurofibromin 2		312	0.468	0.885	1	0.51		1	2	0	2012	2015
Renal Cell Carcinoma	C0007134	MTOR	2475	P42345	mechanistic target of rapamycin kinase	Kinase	960	0.343	0.885	1	0.5		0.983	58	8	2004	2020
Renal Cell Carcinoma	C0007134	MITF	4286	O75030	melanocyte inducing transcription factor		244	0.499	0.808	0.98119	0.5		1	14	2	2003	2019
Renal Cell Carcinoma	C0007134	PIK3CA	5290	P42336	phosphatidylinositol-4,5-bisphosphate 3-kinase catalytic subunit alpha	Kinase	1511	0.292	0.923	1	0.5		1	40	7	2006	2019
Renal Cell Carcinoma	C0007134	TFE3	7030	P19532	transcription factor binding to IGHM enhancer 3		118	0.542	0.654	0.97985	0.5		0.983	120	0	1996	2020
Renal Cell Carcinoma	C0007134	TP53	7157	P04637	tumor protein p53	Transcription factor	2494	0.236	0.962	0.53235	0.5		0.9	90	31	1991	2019
Renal Cell Carcinoma	C0007134	TSC1	7248	Q92574	TSC complex subunit 1		391	0.44	0.808	1	0.5		1	16	0	1995	2020
Renal Cell Carcinoma	C0007134	BAP1	8314	Q92560	BRCA1 associated protein 1	Enzyme	299	0.454	0.731	0.99443	0.5		0.967	30	2	2011	2019
Renal Cell Carcinoma	C0007134	ELOC	6921	Q15369	elongin C	Enzyme modulator	41	0.656	0.5	0.74421	0.46		1	8	2	2013	2019
Renal Cell Carcinoma	C0007134	HNF1B	6928	P35680	HNF1 homeobox B	Nucleic acid binding	279	0.473	0.808	0.99976	0.45		0.8	5	0	1999	2017
Renal Cell Carcinoma	C0007134	SLC49A4	84925	Q96SL1	solute carrier family 49 member 4	Transporter	13	0.78	0.231	2.2526e-09	0.43		1	3	0	2002	2017
Renal Cell Carcinoma	C0007134	HNF1A	6927	P20823	HNF1 homeobox A	Nucleic acid binding	292	0.478	0.846	0.96115	0.42		1	2	0	1994	1999
Renal Cell Carcinoma	C0007134	KEAP1	9817	Q14145	kelch like ECH associated protein 1		251	0.475	0.808	0.00038766	0.42		1	3	0	2013	2019
Renal Cell Carcinoma	C0007134	RNF139	11236	Q8WU17	ring finger protein 139		36	0.67	0.423	0.53807	0.41		1	1	0	2005	2005
Renal Cell Carcinoma	C0007134	ERBB2	2064	P04626	erb-b2 receptor tyrosine kinase 2	Kinase	995	0.328	0.923	0.0059892	0.4		0.769	13	0	1989	2015
Renal Cell Carcinoma	C0007134	ALK	238	Q9UM73	ALK receptor tyrosine kinase	Kinase	519	0.396	0.846	3.2299e-06	0.4		0.947	19	0	2012	2019
Renal Cell Carcinoma	C0007134	GJB1	2705	P08034	gap junction protein beta 1	Cell-cell junction	224	0.514	0.731	0.84627	0.4		1	10	0	2003	2013
Renal Cell Carcinoma	C0007134	SETD2	29072	Q9BYW2	SET domain containing 2, histone lysine methyltransferase	Epigenetic regulator	447	0.424	0.846	1	0.4		1	21	0	2004	2019
Renal Cell Carcinoma	C0007134	GSTM1	2944	P09488	glutathione S-transferase mu 1		627	0.38	0.923	0.0020641	0.4		0.938	16	0	1997	2018
Renal Cell Carcinoma	C0007134	GSTT1	2952	P30711	glutathione S-transferase theta 1		541	0.393	0.923	0.00014834	0.4		1	15	0	1997	2018
Renal Cell Carcinoma	C0007134	IL6	3569	P05231	interleukin 6		2367	0.248	0.962	0.31536	0.4		0.966	29	0	1989	2019
Renal Cell Carcinoma	C0007134	KRT7	3855	P08729	keratin 7		287	0.463	0.808	3.0861e-12	0.4		0.923	13	0	2004	2019
Renal Cell Carcinoma	C0007134	MET	4233	P08581	MET proto-oncogene, receptor tyrosine kinase	Kinase	594	0.38	0.846	0.96998	0.4		0.953	43	9	1996	2020
Renal Cell Carcinoma	C0007134	PBRM1	55193	Q86U86	polybromo 1	Epigenetic regulator	105	0.566	0.615	1	0.4		1	23	0	2011	2019
Renal Cell Carcinoma	C0007134	PRCC	5546	Q92733	proline rich mitotic checkpoint control factor		24	0.716	0.231	0.96281	0.4		1	15	0	1996	2019
Renal Cell Carcinoma	C0007134	TGM2	7052	P21980	transglutaminase 2	Enzyme	315	0.445	0.808	6.8118e-18	0.4		1	11	0	2004	2019
Renal Cell Carcinoma	C0007134	TSC2	7249	P49815	TSC complex subunit 2	Enzyme modulator	410	0.439	0.808	1	0.4		1	21	0	1994	2020
Renal Cell Carcinoma	C0007134	TNFSF10	8743	P50591	TNF superfamily member 10	Signaling	445	0.413	0.885	0.13495	0.4		0.938	16	0	2000	2018
Renal Cell Carcinoma	C0007134	ADIPOQ	9370	Q15848	adiponectin, C1Q and collagen domain containing		679	0.376	0.885	4.6434e-09	0.4		0.9	10	1	2007	2019
Renal Cell Carcinoma	C0007134	SCARB1	949	Q8WTV0	scavenger receptor class B member 1	Receptor	116	0.559	0.731	0.066228	0.4		1	2	1	2011	2017
Renal Cell Carcinoma	C0007134	FLT1	2321	P17948	fms related receptor tyrosine kinase 1	Kinase	424	0.419	0.846	0.99983	0.38		1	9	0	2001	2019
Renal Cell Carcinoma	C0007134	GSTP1	2950	P09211	glutathione S-transferase pi 1		610	0.383	0.923	0.014155	0.37		0.875	8	0	1999	2018
Renal Cell Carcinoma	C0007134	BIRC7	79444	Q96CA5	baculoviral IAP repeat containing 7	Enzyme modulator	59	0.621	0.5	1.1004e-07	0.37		1	7	0	2007	2018
Renal Cell Carcinoma	C0007134	IL13	3596	P35225	interleukin 13		587	0.386	0.846	0.014426	0.36		0.833	6	0	1995	2019
Renal Cell Carcinoma	C0007134	DAPK1	1612	P53355	death associated protein kinase 1	Kinase	249	0.472	0.808	0.99767	0.34		1	5	0	2003	2015
Renal Cell Carcinoma	C0007134	BIRC5	332	O15392	baculoviral IAP repeat containing 5	Enzyme modulator	199	0.495	0.731	0.055854	0.34		1	5	0	2002	2019
Renal Cell Carcinoma	C0007134	ANXA4	307	P09525	annexin A4		74	0.599	0.692	1.1858e-08	0.33		1	3	0	2004	2011
Renal Cell Carcinoma	C0007134	APAF1	317	O14727	apoptotic peptidase activating factor 1		145	0.525	0.769	9.6242e-06	0.33		1	4	0	2006	2012
Renal Cell Carcinoma	C0007134	APRT	353	P07741	adenine phosphoribosyltransferase		384	0.423	0.846	5.4539e-13	0.33		1	4	0	2002	2018
Renal Cell Carcinoma	C0007134	L1CAM	3897	P32004	L1 cell adhesion molecule		289	0.475	0.769	1	0.33		1	3	0	2011	2017
Renal Cell Carcinoma	C0007134	POMC	5443	P01189	proopiomelanocortin		873	0.356	0.846	0.00011658	0.33		1	4	0	1988	2019
Renal Cell Carcinoma	C0007134	PVALB	5816	P20472	parvalbumin	Calcium-binding protein	148	0.547	0.692	0.086602	0.33		1	4	0	2001	2006
Renal Cell Carcinoma	C0007134	SFRP2	6423	Q96HF1	secreted frizzled related protein 2		134	0.544	0.731	0.0016693	0.33		1	3	0	2006	2013
Renal Cell Carcinoma	C0007134	SLC2A1	6513	P11166	solute carrier family 2 member 1	Transporter	687	0.388	0.808	0.9941	0.33		1	4	0	1994	2016
Renal Cell Carcinoma	C0007134	ALOX5	240	P09917	arachidonate 5-lipoxygenase	Enzyme	342	0.447	0.885	1.2059e-06	0.32		1	3	0	2005	2018
Renal Cell Carcinoma	C0007134	HSPB1	3315	P04792	heat shock protein family B (small) member 1		395	0.436	0.808	2.7797e-07	0.32		1	3	0	2004	2011
Renal Cell Carcinoma	C0007134	IFNA2	3440	P01563	interferon alpha 2		355	0.442	0.885		0.32		1	3	0	1996	2014
Renal Cell Carcinoma	C0007134	IL4R	3566	P24394	interleukin 4 receptor	Receptor	242	0.474	0.846	0.00023013	0.32		1	4	2	2002	2019
Renal Cell Carcinoma	C0007134	PAK1	5058	Q13153	p21 (RAC1) activated kinase 1	Kinase	221	0.494	0.808	0.0013306	0.32		1	2	0	2007	2015
Renal Cell Carcinoma	C0007134	SOD2	6648	P04179	superoxide dismutase 2	Enzyme	668	0.379	0.923	0.15499	0.32		1	3	0	2001	2018
Renal Cell Carcinoma	C0007134	NDRG1	10397	Q92597	N-myc downstream regulated 1	Enzyme	225	0.488	0.731	0.011324	0.31		1	2	0	2001	2004
Renal Cell Carcinoma	C0007134	BTG3	10950	Q14201	BTG anti-proliferation factor 3		141	0.528	0.808	0.91582	0.31		1	1	0	2009	2009
Renal Cell Carcinoma	C0007134	CRABP1	1381	P29762	cellular retinoic acid binding protein 1		53	0.631	0.615	0.0058779	0.31		1	1	0	2005	2005
Renal Cell Carcinoma	C0007134	ALDH1A1	216	P00352	aldehyde dehydrogenase 1 family member A1	Enzyme	270	0.46	0.846	0.95448	0.31		1	2	0	2004	2013
Renal Cell Carcinoma	C0007134	ACHE	43	P22303	acetylcholinesterase (Cartwright blood group)	Enzyme	418	0.445	0.885	0.99827	0.31		1	2	0	2008	2010
Renal Cell Carcinoma	C0007134	PGK1	5230	P00558	phosphoglycerate kinase 1	Kinase	144	0.542	0.769	0.76537	0.31		1	2	0	2004	2018
Renal Cell Carcinoma	C0007134	BCHE	590	P06276	butyrylcholinesterase		392	0.447	0.923	1.0643e-13	0.31		1	2	0	2008	2010
Renal Cell Carcinoma	C0007134	RELA	5970	Q04206	RELA proto-oncogene, NF-kB subunit	Transcription factor	483	0.406	0.885	0.99948	0.31		1	2	0	2007	2018
Renal Cell Carcinoma	C0007134	KDM5C	8242	P41229	lysine demethylase 5C		119	0.581	0.538	1	0.31		1	2	0	2011	2018
Renal Cell Carcinoma	C0007134	CASP2	835	P42575	caspase 2	Enzyme	105	0.565	0.731	0.0015026	0.31		1	1	0	2010	2010
Renal Cell Carcinoma	C0007134	UNC5C	8633	O95185	unc-5 netrin receptor C	Receptor	47	0.65	0.462	0.0008813	0.31		1	1	0	2011	2011
Renal Cell Carcinoma	C0007134	ACY1	95	Q03154	aminoacylase 1		62	0.653	0.577	6.9169e-09	0.31		1	2	0	2004	2011
Renal Cell Carcinoma	C0007134	CDKN2A	1029	P42771;Q8N726	cyclin dependent kinase inhibitor 2A		1314	0.3	0.885	0.39474	0.3		1	23	0	1991	2019
Renal Cell Carcinoma	C0007134	CPQ	10404	Q9Y646	carboxypeptidase Q	Enzyme	87	0.579	0.769	1.3154e-14	0.3		1	1	0	2015	2015
Renal Cell Carcinoma	C0007134	AKAP13	11214	Q12802	A-kinase anchoring protein 13		73	0.626	0.615	0.92909	0.3		1	1	0	2011	2011
Renal Cell Carcinoma	C0007134	CSMD3	114788	Q7Z407	CUB and Sushi multiple domains 3		31	0.695	0.5	0.057105	0.3		1	2	0	2011	2013
Renal Cell Carcinoma	C0007134	LRRK2	120892	Q5S007	leucine rich repeat kinase 2	Kinase	231	0.51	0.808	2.5757e-30	0.3		1	1	0	2011	2011
Renal Cell Carcinoma	C0007134	CNN2	1265	Q99439	calponin 2	Cellular structure	36	0.666	0.538	0.024399	0.3		1	1	0	2004	2004
Renal Cell Carcinoma	C0007134	CRYAB	1410	P02511	crystallin alpha B		200	0.515	0.731	0.02247	0.3		1	1	0	2004	2004
Renal Cell Carcinoma	C0007134	ASB15	142685	Q8WXK1	ankyrin repeat and SOCS box containing 15		9	0.792	0.231	1.84e-15	0.3		1	1	0	2011	2011
Renal Cell Carcinoma	C0007134	DNHD1	144132	Q96M86	dynein heavy chain domain 1	Enzyme	8	0.792	0.154	1.2016e-72	0.3		1	1	0	2013	2013
Renal Cell Carcinoma	C0007134	CTSB	1508	P07858	cathepsin B	Enzyme	304	0.457	0.846	5.8819e-11	0.3		1	1	0	2004	2004
Renal Cell Carcinoma	C0007134	CTSD	1509	P07339	cathepsin D	Enzyme	242	0.478	0.846	0.00091747	0.3		1	1	0	2004	2004
Renal Cell Carcinoma	C0007134	FAAH2	158584	Q6GMR7	fatty acid amide hydrolase 2	Enzyme	11	0.821	0.115	1.8917e-21	0.3		1	1	0	2015	2015
Renal Cell Carcinoma	C0007134	EEF2	1938	P13639	eukaryotic translation elongation factor 2	Enzyme	83	0.599	0.731	0.99995	0.3		1	1	0	2004	2004
Renal Cell Carcinoma	C0007134	ALAD	210	P13716	aminolevulinate dehydratase	Enzyme	135	0.556	0.615	5.6185e-05	0.3		1	1	2	2011	2011
Renal Cell Carcinoma	C0007134	PDXDC1	23042	Q6P996	pyridoxal dependent decarboxylase domain containing 1		24	0.78	0.154	3.4641e-12	0.3		1	1	0	2015	2015
Renal Cell Carcinoma	C0007134	SYNE2	23224	Q8WXH0	spectrin repeat containing nuclear envelope protein 2		91	0.623	0.692	1.6503e-25	0.3		1	1	0	2011	2011
Renal Cell Carcinoma	C0007134	PRAME	23532	P78395	preferentially expressed antigen in melanoma		134	0.531	0.577	2.394e-07	0.3		1	1	0	2005	2005
Renal Cell Carcinoma	C0007134	ALOX12B	242	O75342	arachidonate 12-lipoxygenase, 12R type	Enzyme	80	0.603	0.577	0.00075626	0.3		1	1	0	2018	2018
Renal Cell Carcinoma	C0007134	YIPF3	25844	Q9GZM5	Yip1 domain family member 3		6	0.821	0.115	0.14123	0.3		1	1	0	2013	2013
Renal Cell Carcinoma	C0007134	PNKD	25953	Q8N490	PNKD metallo-beta-lactamase domain containing		96	0.615	0.615	4.1392e-08	0.3		1	1	0	2015	2015
Renal Cell Carcinoma	C0007134	OR4C13	283092	Q8NGP0	olfactory receptor family 4 subfamily C member 13	G-protein coupled receptor	6	0.821	0.115	2.5329e-10	0.3		1	1	0	2013	2013
Renal Cell Carcinoma	C0007134	VMO1	284013	Q7Z5L0	vitelline membrane outer layer 1 homolog		6	0.821	0.115	2.1183e-06	0.3		1	1	0	2013	2013
Renal Cell Carcinoma	C0007134	GRB7	2886	Q14451	growth factor receptor bound protein 7	Receptor	71	0.603	0.462	1.3644e-06	0.3		1	1	0	2013	2013
Renal Cell Carcinoma	C0007134	HARS1	3035	P12081	histidyl-tRNA synthetase 1	Enzyme	127	0.569	0.808	2.3839e-06	0.3		1	1	0	2004	2004
Renal Cell Carcinoma	C0007134	HSPA9	3313	P38646	heat shock protein family A (Hsp70) member 9		198	0.502	0.885	0.96852	0.3		1	1	0	2004	2004
Renal Cell Carcinoma	C0007134	HSPD1	3329	P10809	heat shock protein family D (Hsp60) member 1		398	0.432	0.808	0.99257	0.3		1	1	0	2004	2004
Renal Cell Carcinoma	C0007134	MSGN1	343930	A6NI15	mesogenin 1		6	0.821	0.115	0.072006	0.3		1	1	0	2013	2013
Renal Cell Carcinoma	C0007134	IL6R	3570	P08887	interleukin 6 receptor	Signaling	261	0.471	0.846	3.1681e-05	0.3		1	1	0	1995	1995
Renal Cell Carcinoma	C0007134	FAM111B	374393	Q6SJ93	family with sequence similarity 111 member B		33	0.691	0.423	0.098549	0.3		1	1	0	2011	2011
Renal Cell Carcinoma	C0007134	KCNMA1	3778	Q12791	potassium calcium-activated channel subfamily M alpha 1	Ion channel	205	0.518	0.846	0.99731	0.3		1	1	0	2013	2013
Renal Cell Carcinoma	C0007134	KRT8	3856	P05787	keratin 8		166	0.517	0.654	2.36e-08	0.3		1	1	0	2004	2004
Renal Cell Carcinoma	C0007134	KRT32	3882	Q14532	keratin 32		7	0.805	0.192	1.3564e-18	0.3		1	1	0	2013	2013
Renal Cell Carcinoma	C0007134	LDHB	3945	P07195	lactate dehydrogenase B	Enzyme	74	0.604	0.615	4.9734e-06	0.3		1	1	0	2004	2004
Renal Cell Carcinoma	C0007134	M6PR	4074	P20645	mannose-6-phosphate receptor, cation dependent	Receptor	28	0.716	0.269	0.0092215	0.3		1	1	0	2013	2013
Renal Cell Carcinoma	C0007134	MUC4	4585	Q99102	mucin 4, cell surface associated		183	0.506	0.769	2.7904e-54	0.3		1	1	0	2013	2013
Renal Cell Carcinoma	C0007134	MYC	4609	P01106	MYC proto-oncogene, bHLH transcription factor	Transcription factor	821	0.344	0.923	0.99801	0.3		1	16	0	1985	2019
Renal Cell Carcinoma	C0007134	PEBP1	5037	P30086	phosphatidylethanolamine binding protein 1	Enzyme modulator	181	0.5	0.808	0.09167	0.3		1	1	0	2014	2014
Renal Cell Carcinoma	C0007134	SHANK1	50944	Q9Y566	SH3 and multiple ankyrin repeat domains 1		35	0.678	0.385	1	0.3		1	1	0	2011	2011
Renal Cell Carcinoma	C0007134	PDHB	5162	P11177	pyruvate dehydrogenase E1 subunit beta		21	0.711	0.385	0.15201	0.3		1	1	0	2015	2015
Renal Cell Carcinoma	C0007134	LRP1B	53353	Q9NZR2	LDL receptor related protein 1B		63	0.626	0.615	2.5267e-06	0.3		1	1	0	2011	2011
Renal Cell Carcinoma	C0007134	TET2	54790	Q6N021	tet methylcytosine dioxygenase 2		362	0.458	0.808	4.3334e-54	0.3		1	1	0	2013	2013
Renal Cell Carcinoma	C0007134	PIDD1	55367	Q9HB75	p53-induced death domain protein 1		15	0.76	0.231	6.435e-17	0.3		1	1	0	2010	2010
Renal Cell Carcinoma	C0007134	AP5M1	55745	Q9H0R1	adaptor related protein complex 5 subunit mu 1		28	0.695	0.385	1.3325e-09	0.3		1	1	0	2013	2013
Renal Cell Carcinoma	C0007134	FMN2	56776	Q9NZ56	formin 2		88	0.61	0.538	0.99772	0.3		1	1	0	2011	2011
Renal Cell Carcinoma	C0007134	SPTBN4	57731	Q9H254	spectrin beta, non-erythrocytic 4		35	0.686	0.462	1	0.3		1	1	0	2011	2011
Renal Cell Carcinoma	C0007134	RYR1	6261	P21817	ryanodine receptor 1	Ion channel	320	0.489	0.808	1.5944e-29	0.3		1	1	0	2011	2011
Renal Cell Carcinoma	C0007134	SLC5A3	6526	P53794	solute carrier family 5 member 3	Transporter	26	0.7	0.423	0.96739	0.3		1	1	0	2015	2015
Renal Cell Carcinoma	C0007134	AHNAK	79026	Q09666	AHNAK nucleoprotein		60	0.623	0.615	0.89827	0.3		1	1	0	2011	2011
Renal Cell Carcinoma	C0007134	MLLT10	8028	P55197	MLLT10 histone lysine methyltransferase DOT1L cofactor	Transcription factor	116	0.551	0.462	1	0.3		1	1	0	2013	2013
Renal Cell Carcinoma	C0007134	LMAN2L	81562	Q9H0V9	lectin, mannose binding 2 like	Transporter	59	0.641	0.385	1.9629e-11	0.3		1	1	0	2013	2013
Renal Cell Carcinoma	C0007134	CAPG	822	P40121	capping actin protein, gelsolin like	Cellular structure	111	0.548	0.731	9.357e-14	0.3		1	1	0	2004	2004
Renal Cell Carcinoma	C0007134	TAGLN2	8407	P37802	transgelin 2	Cellular structure	64	0.604	0.577	0.0093548	0.3		1	1	0	2004	2004
Renal Cell Carcinoma	C0007134	CARD11	84433	Q9BXL7	caspase recruitment domain family member 11		89	0.582	0.615	0.99995	0.3		1	1	0	2011	2011
Renal Cell Carcinoma	C0007134	CRADD	8738	P78560	CASP2 and RIPK1 domain containing adaptor with death domain		76	0.619	0.5	0.87862	0.3		1	1	0	2010	2010
Renal Cell Carcinoma	C0007134	FPGT	8790	O14772	fucose-1-phosphate guanylyltransferase		6	0.821	0.115	1.0949e-10	0.3		1	1	0	2013	2013
Renal Cell Carcinoma	C0007134	INPP4B	8821	O15327	inositol polyphosphate-4-phosphatase type II B		90	0.573	0.577	0.55218	0.3		1	1	0	2018	2018
Renal Cell Carcinoma	C0007134	NAV3	89795	Q8IVL0	neuron navigator 3		46	0.653	0.615	1	0.3		1	1	0	2011	2011
Renal Cell Carcinoma	C0007134	RPL14	9045	P50914	ribosomal protein L14	Nucleic acid binding	22	0.722	0.308	0.89508	0.3		1	1	0	2013	2013
Renal Cell Carcinoma	C0007134	ZNF765	91661	Q7L2R6	zinc finger protein 765		6	0.821	0.115	8.6566e-06	0.3		1	1	0	2015	2015
Renal Cell Carcinoma	C0007134	NLRP12	91662	P59046	NLR family pyrin domain containing 12		95	0.569	0.846	3.6493e-28	0.3		1	1	0	2013	2013
Renal Cell Carcinoma	C0007134	ZNF804A	91752	Q7Z570	zinc finger protein 804A		53	0.647	0.654	0.0055255	0.3		1	1	0	2011	2011
Renal Cell Carcinoma	C0007134	ZNF536	9745	O15090	zinc finger protein 536		20	0.743	0.346	0.99958	0.3		1	1	0	2013	2013
Renal Cell Carcinoma	C0007134	CUL7	9820	Q14999	cullin 7		90	0.633	0.5	2.5916e-21	0.3		1	1	0	2011	2011
Renal Cell Carcinoma	C0007134	CYP1A1	1543	P04798	cytochrome P450 family 1 subfamily A member 1	Enzyme	379	0.436	0.846	1.0635e-17	0.25		1	6	1	1999	2015
Renal Cell Carcinoma	C0007134	CDKN2B	1030	P42772	cyclin dependent kinase inhibitor 2B		440	0.417	0.769	0.0073369	0.24		1	4	0	1999	2019
Renal Cell Carcinoma	C0007134	IGFBP7	3490	Q16270	insulin like growth factor binding protein 7		241	0.476	0.769	0.0012873	0.24		1	5	0	1997	2017
Renal Cell Carcinoma	C0007134	IGF1R	3480	P08069	insulin like growth factor 1 receptor	Kinase	556	0.399	0.885	0.96799	0.23		1	4	0	2007	2019
Renal Cell Carcinoma	C0007134	TXNIP	10628	Q9H3M7	thioredoxin interacting protein		208	0.49	0.731	0.15918	0.22		1	3	0	2005	2020
Renal Cell Carcinoma	C0007134	ANXA1	301	P04083	annexin A1		336	0.442	0.885	1.2009e-07	0.21		1	2	0	2003	2019
Renal Cell Carcinoma	C0007134	ANXA2	302	P07355	annexin A2		294	0.453	0.808	9.7728e-05	0.21		1	2	0	2003	2015
Renal Cell Carcinoma	C0007134	PTGS1	5742	P23219	prostaglandin-endoperoxide synthase 1	Enzyme	318	0.46	0.885	6.2425e-07	0.21		1	2	0	2003	2013
Renal Cell Carcinoma	C0007134	CTNNB1	1499	P35222	catenin beta 1		1368	0.303	0.885	0.99999	0.2		1	24	0	2000	2020
Renal Cell Carcinoma	C0007134	AKT1	207	P31749	AKT serine/threonine kinase 1	Kinase	1250	0.311	0.962	0.9759	0.2		1	22	0	2007	2020
Renal Cell Carcinoma	C0007134	FH	2271	P07954	fumarate hydratase	Enzyme	231	0.489	0.846	0.08824	0.2		0.96	50	0	2002	2020
Renal Cell Carcinoma	C0007134	FN1	2335	P02751	fibronectin 1	Signaling	724	0.365	0.962	0.0014045	0.2		1	12	0	1992	2019
Renal Cell Carcinoma	C0007134	IFNG	3458	P01579	interferon gamma		1519	0.288	0.962	0.47156	0.2		1	10	0	1992	2016
Renal Cell Carcinoma	C0007134	PPAT	5471	Q06203	phosphoribosyl pyrophosphate amidotransferase	Enzyme	21	0.705	0.385	0.98606	0.2		1	1	0	1979	1979
Renal Cell Carcinoma	C0007134	CCND1	595	P24385	cyclin D1	Enzyme modulator	859	0.344	0.923	0.89057	0.2		1	16	2	2003	2020
Renal Cell Carcinoma	C0007134	SDHB	6390	P21912	succinate dehydrogenase complex iron sulfur subunit B	Enzyme	316	0.474	0.846	0.00024397	0.2		0.958	24	2	2003	2019
Renal Cell Carcinoma	C0007134	NFE2L2	4780	Q16236	nuclear factor, erythroid 2 like 2	Enzyme	823	0.357	0.885	0.0035719	0.16		0.857	7	3	2016	2019
Renal Cell Carcinoma	C0007134	HNF4A	3172	P41235	hepatocyte nuclear factor 4 alpha	Nuclear receptor	340	0.461	0.808	0.15285	0.15		1	5	0	2005	2020
Renal Cell Carcinoma	C0007134	MAP2K1	5604	Q02750	mitogen-activated protein kinase kinase 1	Kinase	389	0.439	0.846	0.89669	0.15		1	6	1	2006	2017
Renal Cell Carcinoma	C0007134	SDHD	6392	O14521	succinate dehydrogenase complex subunit D	Transporter	348	0.472	0.885	0.33697	0.15		0.8	5	0	2008	2017
Renal Cell Carcinoma	C0007134	ITPR2	3709	Q14571	inositol 1,4,5-trisphosphate receptor type 2	Ion channel	55	0.631	0.654	5.7127e-29	0.14		1	6	2	2012	2019
Renal Cell Carcinoma	C0007134	TMEM127	55654	O75204	transmembrane protein 127		72	0.638	0.615	0.012865	0.14		1	4	0	2014	2017
Renal Cell Carcinoma	C0007134	SDHA	6389	P31040	succinate dehydrogenase complex flavoprotein subunit A	Enzyme	246	0.517	0.731	2.6088e-10	0.14		1	4	1	2015	2019
Renal Cell Carcinoma	C0007134	SDHC	6391	Q99643	succinate dehydrogenase complex subunit C		202	0.517	0.846	0.00020065	0.14		0.75	4	0	2008	2015
Renal Cell Carcinoma	C0007134	ZEB2	9839	O60315	zinc finger E-box binding homeobox 2	Transcription factor	292	0.471	0.808	1	0.14		1	6	5	2013	2017
Renal Cell Carcinoma	C0007134	DLC1	10395	Q96QB1	DLC1 Rho GTPase activating protein		144	0.529	0.731	0.99948	0.12		1	2	0	2007	2009
Renal Cell Carcinoma	C0007134	FGFR3	2261	P22607	fibroblast growth factor receptor 3	Kinase	654	0.391	0.846	1.6432e-05	0.12		1	2	0	2011	2012
Renal Cell Carcinoma	C0007134	APC	324	P25054	APC regulator of WNT signaling pathway		703	0.373	0.962	1	0.12		1	2	0	1999	2004
Renal Cell Carcinoma	C0007134	ATM	472	Q13315	ATM serine/threonine kinase	Kinase	684	0.374	0.885	5.5884e-47	0.12		1	3	2	2017	2018
Renal Cell Carcinoma	C0007134	PVT1	5820		Pvt1 oncogene		190	0.495	0.731		0.12		1	3	3	2013	2017
Renal Cell Carcinoma	C0007134	STK11	6794	Q15831	serine/threonine kinase 11	Kinase	372	0.435	0.808	0.9934	0.12		1	2	0	2014	2018
Renal Cell Carcinoma	C0007134	KLLN	100144748	B2CW77	killin, p53 regulated DNA replication inhibitor		95	0.578	0.654	0.0050546	0.11		1	1	0	2011	2011
Renal Cell Carcinoma	C0007134	KIF1B	23095	O60333	kinesin family member 1B	Cellular structure	213	0.516	0.808	1	0.11		1	1	0	2015	2015
Renal Cell Carcinoma	C0007134	INSR	3643	P06213	insulin receptor	Kinase	452	0.432	0.846	3.6145e-05	0.11		1	2	1	2017	2017
Renal Cell Carcinoma	C0007134	MAX	4149	P61244	MYC associated factor X	Transcription factor	141	0.553	0.769	0.8335	0.11		1	1	0	2017	2017
Renal Cell Carcinoma	C0007134	NRAS	4893	P01111	NRAS proto-oncogene, GTPase	Enzyme modulator	611	0.39	0.808	0.49009	0.11		1	2	2	1994	2016
Renal Cell Carcinoma	C0007134	RET	5979	P07949	ret proto-oncogene	Kinase	607	0.392	0.885	1	0.11		1	1	0	2019	2019
Renal Cell Carcinoma	C0007134	RHEB	6009	Q15382	Ras homolog, mTORC1 binding	Enzyme modulator	53	0.631	0.577	0.98119	0.11		1	2	2	2015	2016
Renal Cell Carcinoma	C0007134	SRC	6714	P12931	SRC proto-oncogene, non-receptor tyrosine kinase	Kinase	265	0.467	0.885	0.99691	0.11		1	1	0	2018	2018
Renal Cell Carcinoma	C0007134	BUB1	699	O43683	BUB1 mitotic checkpoint serine/threonine kinase	Kinase	162	0.528	0.731	4.8813e-09	0.11		1	1	0	2008	2008
Renal Cell Carcinoma	C0007134	BUB1B	701	O60566	BUB1 mitotic checkpoint serine/threonine kinase B	Kinase	231	0.502	0.808	6.998e-10	0.11		1	1	0	2008	2008
Renal Cell Carcinoma	C0007134	COL14A1	7373	Q05707	collagen type XIV alpha 1 chain	Receptor	33	0.674	0.615	1.4327e-14	0.11		1	1	0	2010	2010
Renal Cell Carcinoma	C0007134	DPF3	8110	Q92784	double PHD fingers 3	Enzyme	20	0.751	0.462	0.020501	0.11		1	2	1	2017	2019
Renal Cell Carcinoma	C0007134	AXIN2	8313	Q9Y2T1	axin 2		169	0.507	0.692	0.57015	0.11		1	1	0	2013	2013
Renal Cell Carcinoma	C0007134	SEC23B	10483	Q15437	SEC23 homolog B, COPII coat complex component	Enzyme modulator	92	0.579	0.692	6.0973e-20	0.1			0	0
Renal Cell Carcinoma	C0007134	LINC02068	105374219		long intergenic non-protein coding RNA 2068		3	0.931	0.154		0.1		1	1	1	2017	2017
Renal Cell Carcinoma	C0007134	SF3B2	10992	Q13435	splicing factor 3b subunit 2		15	0.78	0.308	0.99992	0.1		1	1	1	2016	2016
Renal Cell Carcinoma	C0007134	FAF1	11124	Q9UNN5	Fas associated factor 1		49	0.666	0.731	0.99895	0.1		1	1	1	2017	2017
Renal Cell Carcinoma	C0007134	RASSF1	11186	Q9NS23	Ras association domain family member 1	Enzyme modulator	400	0.42	0.808	4.9255e-06	0.1		0.867	15	0	2001	2019
Renal Cell Carcinoma	C0007134	ANAPC16	119504	Q96DE5	anaphase promoting complex subunit 16		2	1	0.115	0.022882	0.1		1	1	1	2017	2017
Renal Cell Carcinoma	C0007134	SLCO6A1	133482	Q86UG4	solute carrier organic anion transporter family member 6A1	Transporter	449	0.412	0.885	2.8807e-11	0.1		1	10	0	1994	2017
Renal Cell Carcinoma	C0007134	CRP	1401	P02741	C-reactive protein		1483	0.299	0.962	0.0036969	0.1		1	10	0	2005	2019
Renal Cell Carcinoma	C0007134	CSF2	1437	P04141	colony stimulating factor 2	Signaling	1028	0.33	0.962	0.83468	0.1		1	10	0	1997	2019
Renal Cell Carcinoma	C0007134	POGLUT3	143888	Q7Z4H8	protein O-glucosyltransferase 3		7	0.89	0.154	1.1421e-10	0.1		1	1	1	2017	2017
Renal Cell Carcinoma	C0007134	CTLA4	1493	P16410	cytotoxic T-lymphocyte associated protein 4		722	0.369	0.923	0.94085	0.1		0.941	17	0	2005	2019
Renal Cell Carcinoma	C0007134	DCC	1630	P43146	DCC netrin 1 receptor		279	0.471	0.808	0.99448	0.1			0	0
Renal Cell Carcinoma	C0007134	DLST	1743	P36957	dihydrolipoamide S-succinyltransferase	Enzyme	58	0.653	0.615	0.48474	0.1			0	0
Renal Cell Carcinoma	C0007134	EGF	1950	P01133	epidermal growth factor		774	0.357	0.923	8.5294e-17	0.1		0.842	19	1	1990	2017
Renal Cell Carcinoma	C0007134	EGFR	1956	P00533	epidermal growth factor receptor	Kinase	1394	0.295	0.885	0.36837	0.1		0.952	42	0	1988	2019
Renal Cell Carcinoma	C0007134	EP300	2033	Q09472	E1A binding protein p300		345	0.459	0.846	1	0.1			0	0
Renal Cell Carcinoma	C0007134	EPO	2056	P01588	erythropoietin		646	0.381	0.885	0.01125	0.1		0.909	11	0	1994	2016
Renal Cell Carcinoma	C0007134	EZH2	2146	Q15910	enhancer of zeste 2 polycomb repressive complex 2 subunit	Epigenetic regulator	653	0.376	0.885	1	0.1		0.833	12	0	2008	2018
Renal Cell Carcinoma	C0007134	FHIT	2272	P49789	fragile histidine triad diadenosine triphosphatase		337	0.444	0.846	0.0057055	0.1		1	13	0	1988	2003
Renal Cell Carcinoma	C0007134	PDZD2	23037	O15018	PDZ domain containing 2	Signaling	37	0.666	0.538	0.99694	0.1		1	1	1	2013	2013
Renal Cell Carcinoma	C0007134	TBC1D9	23158	Q6ZT07	TBC1 domain family member 9	Enzyme	491	0.399	0.846	2.8039e-05	0.1		1	13	0	1987	2013
Renal Cell Carcinoma	C0007134	RHOBTB2	23221	Q9BYZ6	Rho related BTB domain containing 2	Enzyme modulator	76	0.631	0.615	0.013306	0.1		1	1	1	2017	2017
Renal Cell Carcinoma	C0007134	DICER1	23405	Q9UPY3	dicer 1, ribonuclease III	Enzyme	302	0.446	0.846	1	0.1			0	0
Renal Cell Carcinoma	C0007134	SF3B1	23451	O75533	splicing factor 3b subunit 1	Nucleic acid binding	200	0.511	0.731	1	0.1		1	1	1	2016	2016
Renal Cell Carcinoma	C0007134	FOLH1	2346	Q04609	folate hydrolase 1	Enzyme	311	0.453	0.885	6.1977e-09	0.1		1	11	0	2017	2019
Renal Cell Carcinoma	C0007134	SMUG1	23583	Q53HV7	single-strand-selective monofunctional uracil-DNA glycosylase 1		1034	0.322	0.923	0.00045154	0.1		1	15	0	2017	2019
Renal Cell Carcinoma	C0007134	ZNF620	253639	Q6ZNG0	zinc finger protein 620	Transcription factor	1	1	0.115	0.00041957	0.1		1	1	1	2017	2017
Renal Cell Carcinoma	C0007134	H2AZ1-DT	256880		H2AZ1 divergent transcript		2	1	0.115		0.1		1	1	1	2017	2017
Renal Cell Carcinoma	C0007134	POT1	25913	Q9NUX5	protection of telomeres 1	Nucleic acid binding	107	0.56	0.731	0.85343	0.1		1	1	1	2017	2017
Renal Cell Carcinoma	C0007134	CD274	29126	Q9NZQ7	CD274 molecule	Receptor	1011	0.324	0.923	0.01916	0.1		0.968	62	0	2007	2020
Renal Cell Carcinoma	C0007134	HIF1A	3091	Q16665	hypoxia inducible factor 1 subunit alpha	Transcription factor	1044	0.327	0.923	0.9777	0.1		1	70	3	2000	2019
Renal Cell Carcinoma	C0007134	HLA-G	3135	P17693	major histocompatibility complex, class I, G		279	0.461	0.769	1.365e-11	0.1		1	11	0	2001	2016
Renal Cell Carcinoma	C0007134	IFNA1	3439	P01562	interferon alpha 1		662	0.371	0.923		0.1		1	11	0	1992	2018
Renal Cell Carcinoma	C0007134	IFNA13	3447	P01562	interferon alpha 13		646	0.374	0.923		0.1		1	11	0	1992	2018
Renal Cell Carcinoma	C0007134	IGF1	3479	P05019	insulin like growth factor 1		1206	0.318	0.885	0.2716	0.1		1	11	1	1999	2019
Renal Cell Carcinoma	C0007134	IL2	3558	P60568	interleukin 2		950	0.336	0.885	0.47968	0.1		1	52	0	1990	2019
Renal Cell Carcinoma	C0007134	IL4	3565	P05112	interleukin 4		996	0.332	0.962	0.0047372	0.1		0.933	15	5	1993	2019
Renal Cell Carcinoma	C0007134	CXCL8	3576	P10145	C-X-C motif chemokine ligand 8	Signaling	1254	0.31	0.962	0.00027377	0.1		1	12	0	1992	2019
Renal Cell Carcinoma	C0007134	IL10	3586	P22301	interleukin 10		1679	0.281	0.923	0.0058874	0.1		1	10	3	1993	2016
Renal Cell Carcinoma	C0007134	AR	367	P10275	androgen receptor	Nuclear receptor	854	0.351	0.846	0.98837	0.1		1	16	0	2004	2019
Renal Cell Carcinoma	C0007134	GSTK1	373156	Q9Y2Q3	glutathione S-transferase kappa 1		445	0.412	0.885	1.9374e-06	0.1		1	10	0	1994	2017
Renal Cell Carcinoma	C0007134	MALAT1	378938		metastasis associated lung adenocarcinoma transcript 1		336	0.435	0.846		0.1		1	13	0	2012	2019
Renal Cell Carcinoma	C0007134	KDR	3791	P35968	kinase insert domain receptor	Kinase	623	0.378	0.885	0.99982	0.1		0.963	27	0	2001	2019
Renal Cell Carcinoma	C0007134	KIT	3815	P10721	KIT proto-oncogene, receptor tyrosine kinase	Kinase	715	0.366	0.808	0.98087	0.1		0.917	12	0	2003	2019
Renal Cell Carcinoma	C0007134	MIR21	406991		microRNA 21		726	0.363	0.846		0.1		1	24	0	2011	2020
Renal Cell Carcinoma	C0007134	MIR210	406992		microRNA 210		277	0.46	0.846		0.1		1	12	0	2010	2018
Renal Cell Carcinoma	C0007134	MDH2	4191	P40926	malate dehydrogenase 2	Enzyme	111	0.595	0.731	0.0066821	0.1			0	0
Renal Cell Carcinoma	C0007134	MDM2	4193	Q00987	MDM2 proto-oncogene	Nucleic acid binding	702	0.362	0.846	0.99981	0.1		1	21	1	1994	2019
Renal Cell Carcinoma	C0007134	MME	4311	P08473	membrane metalloendopeptidase	Enzyme	470	0.407	0.808	1.465e-18	0.1		1	10	0	2005	2019
Renal Cell Carcinoma	C0007134	MMP2	4313	P08253	matrix metallopeptidase 2	Enzyme	1021	0.333	0.923	0.83878	0.1		0.875	16	0	2003	2019
Renal Cell Carcinoma	C0007134	MMP9	4318	P14780	matrix metallopeptidase 9	Enzyme	1337	0.305	0.923	1.8869e-17	0.1		0.944	18	1	2006	2019
Renal Cell Carcinoma	C0007134	MYO7B	4648	Q6PIF6	myosin VIIB	Cellular structure	4	1	0.115	8.9527e-31	0.1		1	1	1	2017	2017
Renal Cell Carcinoma	C0007134	PAX2	5076	Q02962	paired box 2		216	0.495	0.731	0.66999	0.1		0.923	13	0	1995	2013
Renal Cell Carcinoma	C0007134	PCNA	5111	P12004	proliferating cell nuclear antigen	Nucleic acid binding	581	0.382	0.846	0.97606	0.1		1	11	0	1995	2019
Renal Cell Carcinoma	C0007134	PDCD1	5133	Q15116	programmed cell death 1		497	0.402	0.846	0.41706	0.1		1	19	0	2016	2020
Renal Cell Carcinoma	C0007134	ABCB1	5243	P08183	ATP binding cassette subfamily B member 1	Transporter	933	0.344	0.885	1.2564e-05	0.1		0.962	26	0	1987	2019
Renal Cell Carcinoma	C0007134	PIK3CB	5291	P42338	phosphatidylinositol-4,5-bisphosphate 3-kinase catalytic subunit beta	Kinase	1083	0.322	0.885	0.99964	0.1		1	36	0	2006	2019
Renal Cell Carcinoma	C0007134	PIK3CD	5293	O00329	phosphatidylinositol-4,5-bisphosphate 3-kinase catalytic subunit delta	Kinase	1119	0.319	0.885	0.99999	0.1		1	36	0	2006	2019
Renal Cell Carcinoma	C0007134	PIK3CG	5294	P48736	phosphatidylinositol-4,5-bisphosphate 3-kinase catalytic subunit gamma	Kinase	1101	0.32	0.885	1.4076e-06	0.1		1	38	0	2006	2019
Renal Cell Carcinoma	C0007134	SDHAF2	54949	Q9NX18	succinate dehydrogenase complex assembly factor 2		85	0.604	0.692	2.8312e-06	0.1			0	0
Renal Cell Carcinoma	C0007134	STEAP3	55240	Q658P3	STEAP3 metalloreductase		48	0.666	0.385	5.3195e-09	0.1		1	1	1	2019	2019
Renal Cell Carcinoma	C0007134	LARP6	55323	Q9BRS8	La ribonucleoprotein 6, translational regulator	Nucleic acid binding	51	0.631	0.5	0.66874	0.1		0.975	80	0	1992	2019
Renal Cell Carcinoma	C0007134	AXL	558	P30530	AXL receptor tyrosine kinase	Kinase	203	0.489	0.615	0.012951	0.1		1	10	0	2003	2020
Renal Cell Carcinoma	C0007134	PTHLH	5744	P12272	parathyroid hormone like hormone		321	0.453	0.846	0.81146	0.1		1	10	0	1992	2014
Renal Cell Carcinoma	C0007134	BCL2	596	P10415	BCL2 apoptosis regulator	Signaling	1456	0.291	0.885	0.55903	0.1		0.97	33	0	1996	2019
Renal Cell Carcinoma	C0007134	STAT3	6774	P40763	signal transducer and activator of transcription 3	Nucleic acid binding	1193	0.32	0.923	1	0.1		0.958	24	0	2002	2020
Renal Cell Carcinoma	C0007134	TERT	7015	O14746	telomerase reverse transcriptase	Enzyme	703	0.374	0.846	0.99046	0.1		1	10	3	2002	2020
Renal Cell Carcinoma	C0007134	TFDP2	7029	Q14188	transcription factor Dp-2	Nucleic acid binding	18	0.769	0.308	0.9995	0.1		1	1	1	2017	2017
Renal Cell Carcinoma	C0007134	TGFA	7039	P01135	transforming growth factor alpha	Signaling	376	0.432	0.885	0.71981	0.1		1	12	0	1984	2009
Renal Cell Carcinoma	C0007134	TGFB1	7040	P01137	transforming growth factor beta 1	Signaling	1558	0.287	0.962	0.03685	0.1		1	22	0	1992	2020
Renal Cell Carcinoma	C0007134	TNF	7124	P01375	tumor necrosis factor	Signaling	2724	0.231	0.962	0.8033	0.1		1	28	0	1992	2019
Renal Cell Carcinoma	C0007134	VDR	7421	P11473	vitamin D receptor	Nuclear receptor	852	0.352	0.885	1.6787e-05	0.1		0.812	16	4	2002	2020
Renal Cell Carcinoma	C0007134	VEGFA	7422	P15692	vascular endothelial growth factor A	Signaling	1899	0.266	0.923	2.4085e-05	0.1		0.973	185	6	1994	2020
Renal Cell Carcinoma	C0007134	VIM	7431	P08670	vimentin		644	0.372	0.846	0.71255	0.1		1	17	0	1999	2019
Renal Cell Carcinoma	C0007134	CA9	768	Q16790	carbonic anhydrase 9		226	0.483	0.731	1.3027e-09	0.1		1	51	0	1988	2020
Renal Cell Carcinoma	C0007134	CXCR4	7852	P61073	C-X-C motif chemokine receptor 4	G-protein coupled receptor	739	0.362	0.923	0.017804	0.1		0.938	16	1	2004	2019
Renal Cell Carcinoma	C0007134	ASPSCR1	79058	Q9BZE9	ASPSCR1 tether for SLC2A4, UBX domain containing		54	0.653	0.538	4.4156e-12	0.1		1	12	0	2001	2019
Renal Cell Carcinoma	C0007134	TFEB	7942	P19484	transcription factor EB		150	0.527	0.731	0.89931	0.1		1	35	0	2003	2020
Renal Cell Carcinoma	C0007134	AAGAB	79719	Q6PD74	alpha and gamma adaptin binding protein		30	0.695	0.538	3.8664e-07	0.1			0	0
Renal Cell Carcinoma	C0007134	SLC25A11	8402	Q02978	solute carrier family 25 member 11	Transporter	59	0.666	0.615	0.53487	0.1			0	0
Renal Cell Carcinoma	C0007134	CD38	952	P28907	CD38 molecule	Enzyme	473	0.407	0.885	2.3129e-06	0.1		1	11	0	1989	2019
Renal Cell Carcinoma	C0007134	CD44	960	P16070	CD44 molecule (Indian blood group)		711	0.363	0.962	2.4476e-07	0.1		0.909	11	0	1994	2019
Renal Cell Carcinoma	C0007134	ESR1	2099	P03372	estrogen receptor 1	Nuclear receptor	1101	0.324	0.962	0.9992	0.09		1	9	0	2002	2018
Renal Cell Carcinoma	C0007134	AMACR	23600	Q9UHK6	alpha-methylacyl-CoA racemase		179	0.51	0.769	0.027363	0.09		1	9	0	2001	2017
Renal Cell Carcinoma	C0007134	HPGDS	27306	O60760	hematopoietic prostaglandin D synthase		570	0.388	0.923	1.8063e-06	0.09		1	9	0	1993	2018
Renal Cell Carcinoma	C0007134	HLA-A	3105	P04439	major histocompatibility complex, class I, A		672	0.37	0.846	0.0013299	0.09		1	9	0	1998	2017
Renal Cell Carcinoma	C0007134	CASP3	836	P42574	caspase 3	Enzyme	819	0.351	0.923	0.10017	0.09		1	9	0	2003	2019
Renal Cell Carcinoma	C0007134	CDKN1B	1027	P46527	cyclin dependent kinase inhibitor 1B		454	0.409	0.769	0.62376	0.08		1	8	0	2002	2016
Renal Cell Carcinoma	C0007134	CLU	1191	P10909	clusterin		412	0.426	0.885	7.8072e-05	0.08		1	8	0	2001	2018
Renal Cell Carcinoma	C0007134	SARDH	1757	Q9UL12	sarcosine dehydrogenase	Enzyme	166	0.523	0.846	5.2689e-16	0.08		1	8	1	2005	2019
Renal Cell Carcinoma	C0007134	HGF	3082	P14210	hepatocyte growth factor	Enzyme	671	0.374	0.885	0.99947	0.08		1	8	0	1999	2018
Renal Cell Carcinoma	C0007134	IGFBP3	3486	P17936	insulin like growth factor binding protein 3	Enzyme modulator	350	0.439	0.808	0.91029	0.08		0.875	8	0	1991	2017
Renal Cell Carcinoma	C0007134	IL1B	3553	P01584	interleukin 1 beta		1801	0.276	0.962	0.13005	0.08		1	8	1	1992	2020
Renal Cell Carcinoma	C0007134	MIR126	406913		microRNA 126		305	0.447	0.846		0.08		1	8	0	2012	2019
Renal Cell Carcinoma	C0007134	MST1	4485	P26927	macrophage stimulating 1	Enzyme	281	0.465	0.885	4.7831e-19	0.08		1	8	0	1989	2016
Renal Cell Carcinoma	C0007134	COX2	4513	P00403	cytochrome c oxidase subunit II	Enzyme	875	0.352	0.962		0.08		1	8	0	2004	2017
Renal Cell Carcinoma	C0007134	MUC1	4582	P15941	mucin 1, cell surface associated		594	0.384	0.885	0.018774	0.08		0.875	8	0	2000	2017
Renal Cell Carcinoma	C0007134	BHD	50947		Beukes familial hip dysplasia		31	0.678	0.385		0.08		0.875	8	0	2003	2018
Renal Cell Carcinoma	C0007134	CCL2	6347	P13500	C-C motif chemokine ligand 2	Signaling	1157	0.321	0.962	0.60786	0.08		1	8	0	2001	2019
Renal Cell Carcinoma	C0007134	TIMP1	7076	P01033	TIMP metallopeptidase inhibitor 1	Enzyme modulator	603	0.38	0.885	0.4993	0.08		0.875	8	0	2004	2019
Renal Cell Carcinoma	C0007134	COL18A1	80781	P39060	collagen type XVIII alpha 1 chain		323	0.449	0.808	1.7414e-10	0.08		1	8	0	1999	2015
Renal Cell Carcinoma	C0007134	CASP8	841	Q14790	caspase 8	Enzyme	480	0.404	0.923	3.7236e-06	0.08		0.875	8	0	2003	2017
Renal Cell Carcinoma	C0007134	CCK	885	P06307	cholecystokinin		326	0.453	0.846	3.3034e-05	0.08		1	8	0	2017	2019
Renal Cell Carcinoma	C0007134	ABCG2	9429	Q9UNQ0	ATP binding cassette subfamily G member 2 (Junior blood group)	Transporter	420	0.419	0.885	2.0957e-32	0.08		1	8	1	2005	2017
Renal Cell Carcinoma	C0007134	HOTAIR	100124700		HOX transcript antisense RNA		234	0.475	0.769		0.07		1	7	0	2014	2018
Renal Cell Carcinoma	C0007134	MTCO2P12	107075310		MT-CO2 pseudogene 12		703	0.368	0.962		0.07		1	7	0	2004	2017
Renal Cell Carcinoma	C0007134	CTSK	1513	P43235	cathepsin K	Enzyme	221	0.497	0.808	3.0989e-05	0.07		0.714	7	0	2009	2017
Renal Cell Carcinoma	C0007134	ESR2	2100	Q92731	estrogen receptor 2	Nuclear receptor	528	0.4	0.923	4.4516e-08	0.07		1	7	0	2013	2018
Renal Cell Carcinoma	C0007134	HAVCR1	26762	Q96D42	hepatitis A virus cellular receptor 1		217	0.489	0.885	8.5105e-07	0.07		1	7	0	2004	2019
Renal Cell Carcinoma	C0007134	GSK3B	2932	P49841	glycogen synthase kinase 3 beta	Kinase	393	0.43	0.846	0.95571	0.07		1	7	0	2011	2020
Renal Cell Carcinoma	C0007134	MIR200C	406985		microRNA 200c		202	0.486	0.846		0.07		1	7	0	2008	2019
Renal Cell Carcinoma	C0007134	MIR34A	407040		microRNA 34a		428	0.421	0.846		0.07		1	7	0	2012	2019
Renal Cell Carcinoma	C0007134	MLH1	4292	P40692	mutL homolog 1	Nucleic acid binding	526	0.399	0.808	3.41e-05	0.07		1	7	0	2003	2020
Renal Cell Carcinoma	C0007134	NFKB1	4790	P19838	nuclear factor kappa B subunit 1	Transcription factor	551	0.396	0.923	1	0.07		0.857	7	1	1996	2020
Renal Cell Carcinoma	C0007134	MIR429	554210		microRNA 429		117	0.544	0.731		0.07		1	7	0	2013	2019
Renal Cell Carcinoma	C0007134	B2M	567	P61769	beta-2-microglobulin	Immune response	352	0.447	0.846	0.56167	0.07		1	7	0	1992	2007
Renal Cell Carcinoma	C0007134	MIR451A	574411		microRNA 451a		177	0.505	0.769		0.07		1	7	0	2012	2018
Renal Cell Carcinoma	C0007134	ACTB	60	P60709	actin beta	Cellular structure	1110	0.325	0.923	0.98564	0.07		1	7	0	2005	2018
Renal Cell Carcinoma	C0007134	S100A1	6271	P23297	S100 calcium binding protein A1	Calcium-binding protein	396	0.421	0.846	0.0060044	0.07		1	7	0	2002	2015
Renal Cell Carcinoma	C0007134	SFPQ	6421	P23246	splicing factor proline and glutamine rich	Nucleic acid binding	75	0.593	0.654	0.99992	0.07		1	7	0	1997	2017
Renal Cell Carcinoma	C0007134	SFRP1	6422	Q8N474	secreted frizzled related protein 1		227	0.479	0.846	0.96457	0.07		1	7	0	2006	2012
Renal Cell Carcinoma	C0007134	SMARCB1	6598	Q12824	SWI/SNF related, matrix associated, actin dependent regulator of chromatin, subfamily b, member 1	Nucleic acid binding	448	0.434	0.846	0.9971	0.07		1	7	0	2014	2019
Renal Cell Carcinoma	C0007134	TIMP2	7077	P16035	TIMP metallopeptidase inhibitor 2	Enzyme modulator	404	0.425	0.846	0.78893	0.07		0.857	7	0	2001	2019
Renal Cell Carcinoma	C0007134	XRCC1	7515	P18887	X-ray repair cross complementing 1		410	0.421	0.923	6.3386e-09	0.07		1	7	2	1999	2020
Renal Cell Carcinoma	C0007134	PAX8	7849	Q06710	paired box 8		253	0.477	0.731	0.99869	0.07		1	7	0	2010	2019
Renal Cell Carcinoma	C0007134	CFLAR	8837	O15519	CASP8 and FADD like apoptosis regulator	Enzyme	215	0.485	0.846	0.99967	0.07		1	7	0	2005	2019
Renal Cell Carcinoma	C0007134	TMED7-TICAM2	100302736	Q86XR7;Q9Y3B3	TMED7-TICAM2 readthrough		329	0.438	0.769	0.0025936	0.06		1	6	0	2002	2019
Renal Cell Carcinoma	C0007134	CDKN1A	1026	P38936	cyclin dependent kinase inhibitor 1A		490	0.403	0.769	0.0018575	0.06		0.833	6	0	2009	2019
Renal Cell Carcinoma	C0007134	SDS	10993	P20132	serine dehydratase	Enzyme	139	0.534	0.769	0.00013923	0.06		1	6	0	2005	2019
Renal Cell Carcinoma	C0007134	H3P10	115482713		H3 histone pseudogene 10		769	0.35	0.846		0.06		1	6	0	2004	2019
Renal Cell Carcinoma	C0007134	PARP1	142	P09874	poly(ADP-ribose) polymerase 1		565	0.389	0.923	0.00033366	0.06		1	6	0	2004	2019
Renal Cell Carcinoma	C0007134	DNMT1	1786	P26358	DNA methyltransferase 1	Epigenetic regulator	496	0.406	0.885	1	0.06		1	6	0	2003	2017
Renal Cell Carcinoma	C0007134	APEH	327	P13798	acylaminoacyl-peptide hydrolase	Enzyme	36	0.666	0.577	5.0018e-13	0.06		1	6	0	1989	1993
Renal Cell Carcinoma	C0007134	TICAM2	353376	Q86XR7;Q9Y3B3	toll like receptor adaptor molecule 2		332	0.438	0.769	0.0025936	0.06		1	6	0	2002	2019
Renal Cell Carcinoma	C0007134	JAK2	3717	O60674	Janus kinase 2	Kinase	644	0.385	0.885	0.65372	0.06		1	6	0	2008	2019
Renal Cell Carcinoma	C0007134	MIR141	406933		microRNA 141		179	0.497	0.808		0.06		1	6	0	2008	2018
Renal Cell Carcinoma	C0007134	MIR145	406937		microRNA 145		366	0.431	0.846		0.06		1	6	0	2013	2016
Renal Cell Carcinoma	C0007134	MIR205	406988		microRNA 205		210	0.482	0.846		0.06		1	6	0	2014	2019
Renal Cell Carcinoma	C0007134	MIR30A	407029		microRNA 30a		218	0.478	0.808		0.06		1	6	0	2014	2019
Renal Cell Carcinoma	C0007134	SMAD4	4089	Q13485	SMAD family member 4	Transcription factor	575	0.401	0.808	0.99881	0.06		0.833	6	0	2004	2017
Renal Cell Carcinoma	C0007134	MCL1	4170	Q07820	MCL1 apoptosis regulator, BCL2 family member	Signaling	375	0.43	0.808	0.96349	0.06		1	6	0	2009	2018
Renal Cell Carcinoma	C0007134	MKI67	4288	P46013	marker of proliferation Ki-67		351	0.431	0.808	1.2598e-28	0.06		1	6	0	1996	2017
Renal Cell Carcinoma	C0007134	MMP1	4312	P03956	matrix metallopeptidase 1	Enzyme	589	0.385	0.885	7.7197e-18	0.06		0.667	6	0	2003	2015
Renal Cell Carcinoma	C0007134	YBX1	4904	P67809	Y-box binding protein 1		148	0.519	0.769	0.94646	0.06		1	6	0	2015	2019
Renal Cell Carcinoma	C0007134	TMED7	51014	Q86XR7;Q9Y3B3	transmembrane p24 trafficking protein 7	Transporter	336	0.436	0.808	0.47966	0.06		1	6	0	2002	2019
Renal Cell Carcinoma	C0007134	PECAM1	5175	P16284	platelet and endothelial cell adhesion molecule 1	Cell adhesion	396	0.426	0.846		0.06		1	6	0	2004	2019
Renal Cell Carcinoma	C0007134	SORD	6652	Q00796	sorbitol dehydrogenase	Enzyme	113	0.552	0.769	4.4938e-08	0.06		1	6	0	2005	2019
Renal Cell Carcinoma	C0007134	BSG	682	P35613	basigin (Ok blood group)		287	0.458	0.769	2.5873e-05	0.06		1	6	0	2006	2017
Renal Cell Carcinoma	C0007134	TGFBI	7045	Q15582	transforming growth factor beta induced	Signaling	225	0.484	0.769	5.9686e-08	0.06		1	6	0	2008	2019
Renal Cell Carcinoma	C0007134	HAVCR2	84868	Q8TDQ0	hepatitis A virus cellular receptor 2		299	0.45	0.808	0.03866	0.06		1	6	0	2012	2019
Renal Cell Carcinoma	C0007134	CAV1	857	Q03135	caveolin 1	Enzyme modulator	633	0.388	0.885	0.008274	0.06		1	6	0	2003	2017
Renal Cell Carcinoma	C0007134	PROM1	8842	O43490	prominin 1	Transporter	477	0.41	0.846	1.9485e-22	0.06		0.833	6	0	2010	2019
Renal Cell Carcinoma	C0007134	CD70	970	P32970	CD70 molecule		127	0.542	0.692	0.010394	0.06		1	6	0	2006	2019
Renal Cell Carcinoma	C0007134	CIB1	10519	Q99828	calcium and integrin binding 1		275	0.458	0.769	0.00032612	0.05		1	5	0	2002	2016
Renal Cell Carcinoma	C0007134	ZNRD2	10534	O60232	zinc ribbon domain containing 2		311	0.443	0.769	1.8426e-07	0.05		1	5	0	2002	2019
Renal Cell Carcinoma	C0007134	DCTN6	10671	O00399	dynactin subunit 6	Cellular structure	315	0.442	0.769	0.055741	0.05		1	5	0	2002	2019
Renal Cell Carcinoma	C0007134	H3P23	115482696		H3 histone pseudogene 23		310	0.443	0.769		0.05		1	5	0	2002	2019
Renal Cell Carcinoma	C0007134	DAB2IP	153090	Q5VWQ8	DAB2 interacting protein	Enzyme modulator	82	0.588	0.538	0.99995	0.05		1	5	0	2015	2019
Renal Cell Carcinoma	C0007134	CYP1B1	1545	Q16678	cytochrome P450 family 1 subfamily B member 1	Enzyme	304	0.457	0.769	2.2024e-05	0.05		1	5	0	2004	2015
Renal Cell Carcinoma	C0007134	EIF4EBP1	1978	Q13541	eukaryotic translation initiation factor 4E binding protein 1	Nucleic acid binding	201	0.494	0.885	0.20762	0.05		1	5	0	2011	2019
Renal Cell Carcinoma	C0007134	EPOR	2057	P19235	erythropoietin receptor	Receptor	162	0.526	0.692	0.0101	0.05		1	5	0	2005	2014
Renal Cell Carcinoma	C0007134	ALB	213	P02768	albumin	Transporter	1198	0.317	0.962	0.64329	0.05		0.8	5	0	2013	2018
Renal Cell Carcinoma	C0007134	HEPACAM	220296	Q14CZ8	hepatic and glial cell adhesion molecule		70	0.621	0.5	0.86791	0.05		1	5	0	2010	2019
Renal Cell Carcinoma	C0007134	GABPA	2551	Q06546	GA binding protein transcription factor subunit alpha	Transcription factor	632	0.379	0.885	0.99812	0.05		1	5	0	2017	2019
Renal Cell Carcinoma	C0007134	DKK3	27122	Q9UBP4	dickkopf WNT signaling pathway inhibitor 3		186	0.5	0.731	4.1049e-06	0.05		1	5	3	2006	2018
Renal Cell Carcinoma	C0007134	HLA-C	3107	P10321	major histocompatibility complex, class I, C		435	0.415	0.846	1.5695e-06	0.05		0.8	5	0	1993	2008
Renal Cell Carcinoma	C0007134	XIAP	331	P98170	X-linked inhibitor of apoptosis	Enzyme modulator	321	0.447	0.808	0.91837	0.05		1	5	0	2004	2018
Renal Cell Carcinoma	C0007134	IFI27	3429	P40305	interferon alpha inducible protein 27		332	0.437	0.769	0.010698	0.05		1	5	0	2002	2019
Renal Cell Carcinoma	C0007134	FAS	355	P25445	Fas cell surface death receptor		754	0.372	0.923	0.8117	0.05		1	5	0	2000	2010
Renal Cell Carcinoma	C0007134	CXCR2	3579	P25025	C-X-C motif chemokine receptor 2	G-protein coupled receptor	335	0.445	0.923	0.013736	0.05		1	5	0	2005	2018
Renal Cell Carcinoma	C0007134	IL18	3606	Q14116	interleukin 18		750	0.365	0.923	0.030717	0.05		1	5	2	2004	2019
Renal Cell Carcinoma	C0007134	KRAS	3845	P01116	KRAS proto-oncogene, GTPase	Enzyme modulator	1213	0.32	0.923	0.00078803	0.05		1	5	0	2010	2019
Renal Cell Carcinoma	C0007134	LGALS3	3958	P17931	galectin 3	Signaling	557	0.392	0.846	2.3207e-05	0.05		1	5	0	2016	2018
Renal Cell Carcinoma	C0007134	MIR106B	406900		microRNA 106b		143	0.523	0.808		0.05		1	5	0	2016	2019
Renal Cell Carcinoma	C0007134	MIR155	406947		microRNA 155		584	0.384	0.885		0.05		1	5	0	2012	2019
Renal Cell Carcinoma	C0007134	MIR200A	406983		microRNA 200a		156	0.519	0.808		0.05		1	5	0	2013	2018
Renal Cell Carcinoma	C0007134	MIR203A	406986		microRNA 203a		237	0.471	0.808		0.05		1	5	0	2009	2019
Renal Cell Carcinoma	C0007134	MMP7	4316	P09237	matrix metallopeptidase 7	Enzyme	320	0.446	0.885	1.0404e-09	0.05		0.8	5	0	2003	2018
Renal Cell Carcinoma	C0007134	PDGFRB	5159	P09619	platelet derived growth factor receptor beta	Kinase	492	0.416	0.846	0.9041	0.05		1	5	0	2008	2019
Renal Cell Carcinoma	C0007134	PLAU	5328	P00749	plasminogen activator, urokinase	Enzyme	439	0.425	0.923	2.3058e-06	0.05		1	5	0	1984	2006
Renal Cell Carcinoma	C0007134	MAPK1	5594	P28482	mitogen-activated protein kinase 1	Kinase	1059	0.33	0.923	0.99698	0.05		1	5	0	2008	2019
Renal Cell Carcinoma	C0007134	MAPK8	5599	P45983	mitogen-activated protein kinase 8	Kinase	520	0.397	0.885	0.99823	0.05		1	5	0	2016	2018
Renal Cell Carcinoma	C0007134	PSMD9	5715	O00233	proteasome 26S subunit, non-ATPase 9	Enzyme modulator	344	0.435	0.846	4.8603e-06	0.05		1	5	0	2002	2019
Renal Cell Carcinoma	C0007134	NDRG2	57447	Q9UN36	NDRG family member 2	Enzyme	156	0.518	0.692	2.2044e-05	0.05		1	5	0	2008	2019
Renal Cell Carcinoma	C0007134	MIB1	57534	Q86YT6	mindbomb E3 ubiquitin protein ligase 1	Enzyme	329	0.438	0.769	3.3574e-88	0.05		1	5	0	1996	2017
Renal Cell Carcinoma	C0007134	CXCL12	6387	P48061	C-X-C motif chemokine ligand 12		626	0.379	0.846	0.11851	0.05		1	5	0	2006	2017
Renal Cell Carcinoma	C0007134	MUL1	79594	Q969V5	mitochondrial E3 ubiquitin protein ligase 1		241	0.473	0.808	1.9108e-06	0.05		1	5	0	2002	2019
Renal Cell Carcinoma	C0007134	PDCD1LG2	80380	Q9BQ51	programmed cell death 1 ligand 2		191	0.496	0.769	1.203e-05	0.05		1	5	0	2017	2019
Renal Cell Carcinoma	C0007134	CDH6	1004	P55285	cadherin 6		32	0.691	0.385	0.91966	0.04		1	4	0	2002	2005
Renal Cell Carcinoma	C0007134	MICA	100507436	Q29983	MHC class I polypeptide-related sequence A		248	0.473	0.846	0.0049697	0.04		1	4	0	1992	2014
Renal Cell Carcinoma	C0007134	CDK4	1019	P11802	cyclin dependent kinase 4	Kinase	433	0.412	0.808	0.062909	0.04		1	4	0	2011	2018
Renal Cell Carcinoma	C0007134	SPINT2	10653	O43291	serine peptidase inhibitor, Kunitz type 2		112	0.556	0.808	0.00075147	0.04		1	4	1	2004	2018
Renal Cell Carcinoma	C0007134	KHDRBS1	10657	Q07666	KH RNA binding domain containing, signal transduction associated 1	Nucleic acid binding	289	0.457	0.846	0.99423	0.04		1	4	0	2009	2019
Renal Cell Carcinoma	C0007134	FAM107A	11170	O95990	family with sequence similarity 107 member A		36	0.674	0.462	8.2783e-07	0.04		1	4	0	1999	2008
Renal Cell Carcinoma	C0007134	EGLN3	112399	Q9H6Z9	egl-9 family hypoxia inducible factor 3		97	0.575	0.654	0.0094753	0.04		0.75	4	0	2004	2019
Renal Cell Carcinoma	C0007134	PLIN2	123	Q99541	perilipin 2	Transporter	100	0.564	0.692	7.5281e-09	0.04		1	4	0	2005	2019
Renal Cell Carcinoma	C0007134	ABCC2	1244	Q92887	ATP binding cassette subfamily C member 2	Transporter	254	0.483	0.808	5.2025e-47	0.04		1	4	0	1999	2013
Renal Cell Carcinoma	C0007134	CBLL2	158506	Q8N7E2	Cbl proto-oncogene like 2	Enzyme	235	0.476	0.808		0.04		1	4	0	2002	2011
Renal Cell Carcinoma	C0007134	E2F1	1869	Q01094	E2F transcription factor 1	Nucleic acid binding	324	0.441	0.846	0.9877	0.04		1	4	0	2007	2019
Renal Cell Carcinoma	C0007134	EDN1	1906	P05305	endothelin 1	Signaling	679	0.38	0.846	0.45504	0.04		1	4	0	2002	2007
Renal Cell Carcinoma	C0007134	EDNRB	1910	P24530	endothelin receptor type B	G-protein coupled receptor	300	0.47	0.846	0.0092419	0.04		1	4	0	2007	2016
Renal Cell Carcinoma	C0007134	EPHA3	2042	P29320	EPH receptor A3	Kinase	193	0.497	0.692	1.1953e-05	0.04		1	4	0	2009	2017
Renal Cell Carcinoma	C0007134	EPHB2	2048	P29323	EPH receptor B2	Kinase	649	0.374	0.846	0.99997	0.04		1	4	0	2008	2019
Renal Cell Carcinoma	C0007134	FABP7	2173	O15540	fatty acid binding protein 7		82	0.584	0.577	0.00078595	0.04		1	4	0	2007	2017
Renal Cell Carcinoma	C0007134	BRD4	23476	O60885	bromodomain containing 4	Epigenetic regulator	335	0.446	0.885	1	0.04		1	4	0	2017	2018
Renal Cell Carcinoma	C0007134	XRCC6	2547	P12956	X-ray repair cross complementing 6	Enzyme	119	0.552	0.769	0.99904	0.04		1	4	4	2012	2015
Renal Cell Carcinoma	C0007134	GATA3	2625	P23771	GATA binding protein 3		429	0.415	0.846	0.89887	0.04		1	4	0	2010	2019
Renal Cell Carcinoma	C0007134	ANGPT2	285	O15123	angiopoietin 2	Signaling	457	0.41	0.846	0.83208	0.04		1	4	0	2002	2017
Renal Cell Carcinoma	C0007134	HILPDA	29923	Q9Y5L2	hypoxia inducible lipid droplet associated		39	0.656	0.538	0.31634	0.04		1	4	0	2005	2017
Renal Cell Carcinoma	C0007134	HDAC1	3065	Q13547	histone deacetylase 1	Epigenetic regulator	277	0.46	0.846	0.61427	0.04		1	4	0	2018	2019
Renal Cell Carcinoma	C0007134	HLA-DRB1	3123	P01911	major histocompatibility complex, class II, DR beta 1	Immune response	1018	0.333	0.923	0.0010997	0.04		1	4	0	1997	2017
Renal Cell Carcinoma	C0007134	HMOX1	3162	P09601	heme oxygenase 1		666	0.381	0.923	0.0096817	0.04		0.75	4	0	1996	2019
Renal Cell Carcinoma	C0007134	IFNB1	3456	P01574	interferon beta 1		426	0.421	0.846		0.04		1	4	0	2003	2012
Renal Cell Carcinoma	C0007134	IL16	3603	Q14005	interleukin 16	Signaling	193	0.501	0.846	1.2449e-10	0.04		0.75	4	2	2010	2019
Renal Cell Carcinoma	C0007134	ITGA5	3678	P08648	integrin subunit alpha 5		145	0.524	0.769	0.42455	0.04		1	4	0	2014	2017
Renal Cell Carcinoma	C0007134	CD82	3732	P27701	CD82 molecule		172	0.507	0.731	1.2726e-08	0.04		1	4	0	2009	2017
Renal Cell Carcinoma	C0007134	KRT19	3880	P08727	keratin 19		270	0.46	0.731	0.0043426	0.04		0.75	4	0	2007	2018
Renal Cell Carcinoma	C0007134	LEP	3952	P41159	leptin		931	0.349	0.846	0.46491	0.04		0.5	4	0	2017	2019
Renal Cell Carcinoma	C0007134	LOXL2	4017	Q9Y4K0	lysyl oxidase like 2		149	0.527	0.731	3.3844e-07	0.04		1	4	0	2015	2019
Renal Cell Carcinoma	C0007134	LINC01194	404663		long intergenic non-protein coding RNA 1194		249	0.47	0.769		0.04		1	4	0	2003	2019
Renal Cell Carcinoma	C0007134	MIR15A	406948		microRNA 15a		221	0.482	0.808		0.04		1	4	0	2017	2019
Renal Cell Carcinoma	C0007134	MIR221	407006		microRNA 221		304	0.449	0.846		0.04		1	4	0	2014	2019
Renal Cell Carcinoma	C0007134	MIR222	407007		microRNA 222		210	0.486	0.808		0.04		1	4	0	2014	2019
Renal Cell Carcinoma	C0007134	MIR27A	407018		microRNA 27a		248	0.466	0.846		0.04		1	4	1	2007	2015
Renal Cell Carcinoma	C0007134	MMP3	4314	P08254	matrix metallopeptidase 3	Enzyme	473	0.408	0.885	5.7362e-15	0.04		1	4	0	2004	2019
Renal Cell Carcinoma	C0007134	ABCC1	4363	P33527	ATP binding cassette subfamily C member 1	Transporter	333	0.445	0.808	0.0011727	0.04		1	4	0	1996	2018
Renal Cell Carcinoma	C0007134	MIR338	442906		microRNA 338		128	0.535	0.808		0.04		1	4	0	2017	2018
Renal Cell Carcinoma	C0007134	MSH2	4436	P43246	mutS homolog 2	Nucleic acid binding	490	0.406	0.808	0.89539	0.04		0.5	4	0	2006	2012
Renal Cell Carcinoma	C0007134	MT1G	4495	P13640	metallothionein 1G		64	0.604	0.731	0.032173	0.04		1	4	0	2000	2019
Renal Cell Carcinoma	C0007134	MTHFR	4524	P42898	methylenetetrahydrofolate reductase		985	0.337	0.885	3.2068e-10	0.04		0.75	4	3	2008	2019
Renal Cell Carcinoma	C0007134	NEDD9	4739	Q14511	neural precursor cell expressed, developmentally down-regulated 9		113	0.548	0.769	0.12634	0.04		1	4	0	1996	2017
Renal Cell Carcinoma	C0007134	CCN3	4856	P48745	cellular communication network factor 3	Signaling	117	0.554	0.615	0.0066442	0.04		1	4	0	2005	2017
Renal Cell Carcinoma	C0007134	MIR378A	494327		microRNA 378a		127	0.532	0.808		0.04		1	4	0	2012	2019
Renal Cell Carcinoma	C0007134	SERPINE1	5054	P05121	serpin family E member 1	Enzyme modulator	770	0.359	0.885	0.043609	0.04		1	4	0	1996	2008
Renal Cell Carcinoma	C0007134	PRKN	5071	O60260	parkin RBR E3 ubiquitin protein ligase	Enzyme	409	0.431	0.846	6.9346e-07	0.04		1	4	0	2002	2011
Renal Cell Carcinoma	C0007134	FOXP3	50943	Q9BZS1	forkhead box P3		688	0.368	0.846	0.99424	0.04		1	4	0	2018	2020
Renal Cell Carcinoma	C0007134	NDUFA13	51079	Q9P0J0	NADH:ubiquinone oxidoreductase subunit A13	Enzyme	131	0.556	0.692	3.8049e-06	0.04		1	4	0	2006	2018
Renal Cell Carcinoma	C0007134	APH1A	51107	Q96BI3	aph-1 homolog A, gamma-secretase subunit	Enzyme modulator	45	0.656	0.538	0.79479	0.04		1	4	0	1997	2017
Renal Cell Carcinoma	C0007134	PKM	5315	P14618	pyruvate kinase M1/2	Kinase	237	0.482	0.808	0.8549	0.04		1	4	0	2016	2019
Renal Cell Carcinoma	C0007134	KRT20	54474	P35900	keratin 20		559	0.388	0.846	9.0776e-11	0.04		1	4	0	2013	2018
Renal Cell Carcinoma	C0007134	PPARG	5468	P37231	peroxisome proliferator activated receptor gamma	Nuclear receptor	877	0.358	0.885	0.029194	0.04		1	4	2	2001	2010
Renal Cell Carcinoma	C0007134	TUG1	55000		taurine up-regulated 1		134	0.522	0.769		0.04		1	4	0	2016	2019
Renal Cell Carcinoma	C0007134	FBXW7	55294	Q969H0	F-box and WD repeat domain containing 7	Enzyme modulator	257	0.465	0.808	0.99949	0.04		1	4	0	2009	2018
Renal Cell Carcinoma	C0007134	PRKAA1	5562	Q13131	protein kinase AMP-activated catalytic subunit alpha 1	Kinase	325	0.453	0.846	0.13725	0.04		1	4	0	2010	2019
Renal Cell Carcinoma	C0007134	PRKAB1	5564	Q9Y478	protein kinase AMP-activated non-catalytic subunit beta 1	Kinase	296	0.46	0.846	0.0052573	0.04		1	4	0	2010	2019
Renal Cell Carcinoma	C0007134	PRKCA	5578	P17252	protein kinase C alpha	Kinase	368	0.44	0.846	0.3677	0.04		0.75	4	0	2011	2017
Renal Cell Carcinoma	C0007134	BRK1	55845	Q8WUW1	BRICK1 subunit of SCAR/WAVE actin nucleating complex		14	0.743	0.308	0.68706	0.04		0.5	4	0	2004	2009
Renal Cell Carcinoma	C0007134	ACSS2	55902	Q9NR19	acyl-CoA synthetase short chain family member 2	Enzyme	188	0.506	0.808	1.1443e-13	0.04		1	4	0	1997	2018
Renal Cell Carcinoma	C0007134	MAPK3	5595	P27361	mitogen-activated protein kinase 3	Kinase	647	0.379	0.885	0.036884	0.04		1	4	0	2014	2018
Renal Cell Carcinoma	C0007134	BAX	581	Q07812	BCL2 associated X, apoptosis regulator	Signaling	420	0.417	0.885	0.31746	0.04		1	4	0	1998	2002
Renal Cell Carcinoma	C0007134	MOK	5891	Q9UQ07	MOK protein kinase	Kinase	251	0.476	0.769	8.8397e-22	0.04		1	4	0	1996	2018
Renal Cell Carcinoma	C0007134	REN	5972	P00797	renin	Enzyme	721	0.37	0.923	2.4297e-07	0.04		1	4	0	1992	2019
Renal Cell Carcinoma	C0007134	SOX2	6657	P48431	SRY-box transcription factor 2	Transcription factor	503	0.405	0.808	0.70662	0.04		1	4	0	2011	2019
Renal Cell Carcinoma	C0007134	SOX4	6659	Q06945	SRY-box transcription factor 4	Transcription factor	246	0.489	0.808	0.92656	0.04		1	4	0	2015	2018
Renal Cell Carcinoma	C0007134	SPP1	6696	P10451	secreted phosphoprotein 1		824	0.353	0.885	2.146e-06	0.04		1	4	0	2018	2020
Renal Cell Carcinoma	C0007134	BRAF	673	P15056	B-Raf proto-oncogene, serine/threonine kinase	Kinase	1228	0.319	0.846	0.99995	0.04		1	4	2	2003	2016
Renal Cell Carcinoma	C0007134	AURKA	6790	O14965	aurora kinase A	Kinase	245	0.475	0.731	0.8676	0.04		1	4	1	2007	2018
Renal Cell Carcinoma	C0007134	TAP1	6890	Q03518	transporter 1, ATP binding cassette subfamily B member	Transporter	181	0.5	0.808	5.3431e-06	0.04		0.75	4	0	1997	2003
Renal Cell Carcinoma	C0007134	TEK	7010	Q02763	TEK receptor tyrosine kinase	Kinase	300	0.462	0.692	1	0.04		1	4	0	2002	2020
Renal Cell Carcinoma	C0007134	TGFBR2	7048	P37173	transforming growth factor beta receptor 2	Kinase	502	0.413	0.846	0.12535	0.04		1	4	0	2003	2015
Renal Cell Carcinoma	C0007134	TIMP3	7078	P35625	TIMP metallopeptidase inhibitor 3	Enzyme modulator	325	0.445	0.923	0.63037	0.04		1	4	0	2001	2017
Renal Cell Carcinoma	C0007134	TLR1	7096	Q15399	toll like receptor 1		198	0.496	0.808	5.8704e-23	0.04		1	4	0	1996	2000
Renal Cell Carcinoma	C0007134	TWIST1	7291	Q15672	twist family bHLH transcription factor 1	Transcription factor	559	0.397	0.846	0.34491	0.04		1	4	0	2017	2019
Renal Cell Carcinoma	C0007134	KDM6A	7403	O15550	lysine demethylase 6A	Epigenetic regulator	238	0.498	0.769	1	0.04		1	4	0	2012	2018
Renal Cell Carcinoma	C0007134	VTCN1	79679	Q7Z7D3	V-set domain containing T cell activation inhibitor 1	Enzyme modulator	139	0.529	0.692	1.3669e-12	0.04		1	4	0	2006	2018
Renal Cell Carcinoma	C0007134	RBM10	8241	P98175	RNA binding motif protein 10		99	0.599	0.615	1	0.04		1	4	0	2016	2019
Renal Cell Carcinoma	C0007134	SPOP	8405	O43791	speckle type BTB/POZ protein		72	0.597	0.5	0.99922	0.04		1	4	0	2009	2018
Renal Cell Carcinoma	C0007134	CD80	941	P33681	CD80 molecule		233	0.475	0.769	0.010898	0.04		0.75	4	0	1995	2015
Renal Cell Carcinoma	C0007134	CD40LG	959	P29965	CD40 ligand	Signaling	453	0.414	0.846	0.72079	0.04		1	4	0	2002	2019
Renal Cell Carcinoma	C0007134	CD68	968	P34810	CD68 molecule	Transporter	452	0.408	0.808	1.4063e-06	0.04		1	4	0	2014	2018
Renal Cell Carcinoma	C0007134	CDH1	999	P12830	cadherin 1		508	0.401	0.808	0.14631	0.04		1	4	0	2001	2017
Renal Cell Carcinoma	C0007134	MIR877	100126314		microRNA 877		34	0.67	0.385		0.03		1	3	0	2019	2019
Renal Cell Carcinoma	C0007134	CD24	100133941	P25063	CD24 molecule		244	0.472	0.769		0.03		1	3	0	2008	2017
Renal Cell Carcinoma	C0007134	HOTTIP	100316868		HOXA distal transcript antisense RNA		90	0.575	0.654		0.03		1	3	0	2018	2019
Renal Cell Carcinoma	C0007134	CDK2	1017	P24941	cyclin dependent kinase 2	Kinase	270	0.456	0.692	0.61054	0.03		1	3	0	2014	2018
Renal Cell Carcinoma	C0007134	MAD2L2	10459	Q9UI95	mitotic arrest deficient 2 like 2		144	0.547	0.731	0.082082	0.03		1	3	0	2001	2008
Renal Cell Carcinoma	C0007134	SIX2	10736	Q9NPC8	SIX homeobox 2	Transcription factor	79	0.604	0.654	0.93869	0.03		1	3	0	2013	2019
Renal Cell Carcinoma	C0007134	NES	10763	P48681	nestin		302	0.45	0.808	1.6236e-06	0.03		1	3	0	2017	2019
Renal Cell Carcinoma	C0007134	CISH	1154	Q9NSE2	cytokine inducible SH2 containing protein	Enzyme modulator	195	0.5	0.808	0.00053852	0.03		1	3	0	2011	2018
Renal Cell Carcinoma	C0007134	COL11A2	1302	P13942	collagen type XI alpha 2 chain		399	0.435	0.846	0.70197	0.03		1	3	0	2004	2018
Renal Cell Carcinoma	C0007134	MAP3K8	1326	P41279	mitogen-activated protein kinase kinase kinase 8	Kinase	168	0.516	0.846	0.96825	0.03		1	3	0	2013	2016
Renal Cell Carcinoma	C0007134	CLDN7	1366	O95471	claudin 7	Cell-cell junction	192	0.494	0.808	0.0028828	0.03		1	3	0	2007	2009
Renal Cell Carcinoma	C0007134	GATA5	140628	Q9BWX5	GATA binding protein 5		101	0.578	0.615	0.28478	0.03		1	3	0	2012	2014
Renal Cell Carcinoma	C0007134	ACE	1636	P12821	angiotensin I converting enzyme	Enzyme	1082	0.328	0.923	1.0344e-37	0.03		1	3	0	2011	2017
Renal Cell Carcinoma	C0007134	DES	1674	P17661	desmin		330	0.46	0.846	0.0088282	0.03		1	3	0	2004	2013
Renal Cell Carcinoma	C0007134	AGT	183	P01019	angiotensinogen	Enzyme modulator	765	0.367	0.923	4.9706e-08	0.03		1	3	1	1995	2015
Renal Cell Carcinoma	C0007134	EIF4E	1977	P06730	eukaryotic translation initiation factor 4E	Nucleic acid binding	317	0.448	0.846	0.94133	0.03		1	3	0	2017	2018
Renal Cell Carcinoma	C0007134	PTK2B	2185	Q14289	protein tyrosine kinase 2 beta	Kinase	319	0.448	0.808	0.93536	0.03		1	3	0	2018	2019
Renal Cell Carcinoma	C0007134	FGF2	2247	P09038	fibroblast growth factor 2	Signaling	635	0.383	0.923	0.0184	0.03		1	3	0	1994	2007
Renal Cell Carcinoma	C0007134	FOXM1	2305	Q08050	forkhead box M1		323	0.441	0.769	0.0007414	0.03		1	3	0	2017	2019
Renal Cell Carcinoma	C0007134	FOXO1	2308	Q12778	forkhead box O1		380	0.433	0.846	0.99725	0.03		1	3	0	2012	2018
Renal Cell Carcinoma	C0007134	SIRT1	23411	Q96EB6	sirtuin 1	Epigenetic regulator	675	0.378	0.885	0.087326	0.03		1	3	0	2016	2019
Renal Cell Carcinoma	C0007134	SEC14L2	23541	O76054	SEC14 like lipid binding 2		198	0.494	0.885	2.9195e-08	0.03		1	3	0	1996	2003
Renal Cell Carcinoma	C0007134	NUP62	23636	P37198	nucleoporin 62	Transporter	273	0.47	0.885	0.95006	0.03		1	3	0	2016	2019
Renal Cell Carcinoma	C0007134	ALPP	250	P05187	alkaline phosphatase, placental	Enzyme	209	0.487	0.808	1.8144e-13	0.03		1	3	0	1997	2014
Renal Cell Carcinoma	C0007134	GC	2638	P02774	GC vitamin D binding protein	Transporter	219	0.489	0.885	2.7301e-11	0.03		1	3	0	1984	2019
Renal Cell Carcinoma	C0007134	BBC3	27113	Q96PG8;Q9BXH1	BCL2 binding component 3		157	0.517	0.769	0.0039762	0.03		1	3	0	2011	2017
Renal Cell Carcinoma	C0007134	RPS6KA6	27330	Q9UK32	ribosomal protein S6 kinase A6	Kinase	37	0.686	0.385	0.9865	0.03		1	3	0	2009	2013
Renal Cell Carcinoma	C0007134	GNAS	2778	O95467;P63092;P84996;Q5JWF2	GNAS complex locus	Enzyme modulator	536	0.42	0.885	0.68076	0.03		1	3	1	2006	2017
Renal Cell Carcinoma	C0007134	CXCR3	2833	P49682	C-X-C motif chemokine receptor 3	G-protein coupled receptor	367	0.436	0.808	0.181	0.03		1	3	0	2007	2016
Renal Cell Carcinoma	C0007134	GPT	2875	P24298	glutamic--pyruvic transaminase	Enzyme	511	0.403	0.923	3.5945e-19	0.03		1	3	0	2011	2019
Renal Cell Carcinoma	C0007134	GRP	2922	P07492	gastrin releasing peptide		172	0.524	0.769	0.0025347	0.03		1	3	0	2000	2005
Renal Cell Carcinoma	C0007134	GSTM2	2946	P28161	glutathione S-transferase mu 2		195	0.488	0.808	3.3913e-07	0.03		1	3	0	2000	2014
Renal Cell Carcinoma	C0007134	GTF2H1	2965	P32780	general transcription factor IIH subunit 1	Transcription factor	258	0.469	0.846	0.98982	0.03		1	3	0	2016	2019
Renal Cell Carcinoma	C0007134	HMGB1	3146	P09429	high mobility group box 1	Nucleic acid binding	724	0.368	0.923	0.82035	0.03		1	3	0	2018	2019
Renal Cell Carcinoma	C0007134	HSPA4	3308	P34932	heat shock protein family A (Hsp70) member 4		550	0.394	0.923	0.99954	0.03		1	3	0	1998	2014
Renal Cell Carcinoma	C0007134	ICAM1	3383	P05362	intercellular adhesion molecule 1		737	0.364	0.962	0.035295	0.03		0.667	3	0	1994	2015
Renal Cell Carcinoma	C0007134	IFNAR2	3455	P48551	interferon alpha and beta receptor subunit 2	Receptor	85	0.585	0.731	8.5332e-06	0.03		1	3	0	2007	2011
Renal Cell Carcinoma	C0007134	KLK3	354	P07288	kallikrein related peptidase 3	Enzyme	358	0.443	0.885	4.4271e-06	0.03		1	3	0	1997	2017
Renal Cell Carcinoma	C0007134	ILK	3611	Q13418	integrin linked kinase	Kinase	192	0.503	0.769	3.7887e-05	0.03		1	3	0	2007	2019
Renal Cell Carcinoma	C0007134	CXCL10	3627	P02778	C-X-C motif chemokine ligand 10	Signaling	631	0.378	0.885	0.36865	0.03		1	3	0	1999	2009
Renal Cell Carcinoma	C0007134	KISS1	3814	Q15726	KiSS-1 metastasis suppressor		179	0.507	0.808	0.49039	0.03		1	3	0	2008	2012
Renal Cell Carcinoma	C0007134	LDHA	3939	P00338	lactate dehydrogenase A	Enzyme	185	0.507	0.808	0.069173	0.03		1	3	0	2017	2018
Renal Cell Carcinoma	C0007134	LEPR	3953	P48357	leptin receptor	Signaling	416	0.433	0.808	0.99475	0.03		1	3	1	2017	2019
Renal Cell Carcinoma	C0007134	LHX1	3975	P48742	LIM homeobox 1	Nucleic acid binding	44	0.691	0.385	0.029231	0.03		1	3	0	2011	2019
Renal Cell Carcinoma	C0007134	C17orf97	400566	Q6ZQX7	chromosome 17 open reading frame 97		117	0.548	0.577	4.8417e-06	0.03		1	3	0	2013	2018
Renal Cell Carcinoma	C0007134	MIR106A	406899		microRNA 106a		140	0.524	0.846		0.03		1	3	0	2015	2017
Renal Cell Carcinoma	C0007134	MIR122	406906		microRNA 122		250	0.468	0.808		0.03		1	3	0	2013	2018
Renal Cell Carcinoma	C0007134	MIR125A	406910		microRNA 125a		225	0.48	0.769		0.03		1	3	0	2015	2019
Renal Cell Carcinoma	C0007134	MIR183	406959		microRNA 183		190	0.494	0.885		0.03		1	3	0	2015	2019
Renal Cell Carcinoma	C0007134	MIR195	406971		microRNA 195		180	0.496	0.769		0.03		1	3	0	2016	2017
Renal Cell Carcinoma	C0007134	MIR200B	406984		microRNA 200b		180	0.5	0.769		0.03		1	3	0	2013	2019
Renal Cell Carcinoma	C0007134	MIR204	406987		microRNA 204		203	0.487	0.808		0.03		1	3	0	2015	2016
Renal Cell Carcinoma	C0007134	MIR206	406989		microRNA 206		226	0.477	0.846		0.03		1	3	0	2016	2019
Renal Cell Carcinoma	C0007134	MIR22	407004		microRNA 22		195	0.496	0.808		0.03		1	3	0	2016	2019
Renal Cell Carcinoma	C0007134	MIR224	407009		microRNA 224		128	0.534	0.654		0.03		0.667	3	0	2012	2018
Renal Cell Carcinoma	C0007134	MIR29B1	407024		microRNA 29b-1		212	0.485	0.846		0.03		1	3	0	2015	2018
Renal Cell Carcinoma	C0007134	MIR29B2	407025		microRNA 29b-2		214	0.484	0.885		0.03		1	3	0	2015	2018
Renal Cell Carcinoma	C0007134	SMAD2	4087	Q15796	SMAD family member 2	Transcription factor	289	0.456	0.808	0.99661	0.03		1	3	0	2006	2020
Renal Cell Carcinoma	C0007134	MAGEA6	4105	P43360	MAGE family member A6	Cell adhesion	17	0.736	0.231		0.03		1	3	0	2002	2018
Renal Cell Carcinoma	C0007134	MFAP1	4236	P55081	microfibril associated protein 1	Extracellular structure	357	0.431	0.846	0.79602	0.03		1	3	0	2002	2018
Renal Cell Carcinoma	C0007134	KITLG	4254	P21583	KIT ligand		249	0.473	0.885	0.85024	0.03		1	3	0	2001	2005
Renal Cell Carcinoma	C0007134	MIP	4284	P30301	major intrinsic protein of lens fiber	Ion channel	181	0.507	0.846	0.030956	0.03		1	3	0	2011	2019
Renal Cell Carcinoma	C0007134	NME1	4830	P15531	NME/NM23 nucleoside diphosphate kinase 1	Kinase	329	0.443	0.808	0.0031764	0.03		0.667	3	0	1997	2005
Renal Cell Carcinoma	C0007134	NONO	4841	Q15233	non-POU domain containing octamer binding	Nucleic acid binding	142	0.554	0.731	0.9935	0.03		1	3	0	2017	2019
Renal Cell Carcinoma	C0007134	NOTCH1	4851	P46531	notch receptor 1		693	0.369	0.885	1	0.03		1	3	0	2015	2017
Renal Cell Carcinoma	C0007134	NTRK1	4914	P04629	neurotrophic receptor tyrosine kinase 1	Kinase	443	0.422	0.808	1.9568e-06	0.03		1	3	0	1997	2018
Renal Cell Carcinoma	C0007134	ROR2	4920	Q01974	receptor tyrosine kinase like orphan receptor 2	Kinase	250	0.498	0.731	0.00012401	0.03		1	3	0	2009	2014
Renal Cell Carcinoma	C0007134	DUXAP8	503637		double homeobox A pseudogene 8		24	0.7	0.269		0.03		1	3	0	2017	2019
Renal Cell Carcinoma	C0007134	NOX4	50507	Q9NPH5	NADPH oxidase 4	Enzyme	260	0.471	0.885	5.7555e-20	0.03		0.667	3	0	2005	2018
Renal Cell Carcinoma	C0007134	ADIPOR1	51094	Q96A54	adiponectin receptor 1	Receptor	148	0.529	0.808	0.6584	0.03		0.667	3	0	2014	2019
Renal Cell Carcinoma	C0007134	DCTN4	51164	Q9UJW0	dynactin subunit 4		253	0.472	0.846	0.73221	0.03		1	3	0	2016	2019
Renal Cell Carcinoma	C0007134	MED15	51586	Q96RN5	mediator complex subunit 15		57	0.623	0.654	0.99974	0.03		1	3	0	2018	2019
Renal Cell Carcinoma	C0007134	PFN1	5216	P07737	profilin 1		119	0.565	0.769	0.73258	0.03		1	3	0	2011	2015
Renal Cell Carcinoma	C0007134	PLK1	5347	P53350	polo like kinase 1	Kinase	253	0.467	0.808	0.97851	0.03		1	3	0	2013	2019
Renal Cell Carcinoma	C0007134	POU2F2	5452	P09086	POU class 2 homeobox 2		69	0.599	0.692	0.99884	0.03		1	3	0	2016	2019
Renal Cell Carcinoma	C0007134	POU5F1	5460	Q01860	POU class 5 homeobox 1		328	0.441	0.846	0.95371	0.03		1	3	0	2016	2019
Renal Cell Carcinoma	C0007134	PPBP	5473	P02775	pro-platelet basic protein	Signaling	111	0.544	0.808	0.057739	0.03		1	3	0	2014	2017
Renal Cell Carcinoma	C0007134	TESC	54997	Q96BS2	tescalcin		97	0.57	0.692	0.10778	0.03		1	3	0	2018	2019
Renal Cell Carcinoma	C0007134	PRKAA2	5563	P54646	protein kinase AMP-activated catalytic subunit alpha 2	Kinase	317	0.456	0.846	3.5282e-08	0.03		1	3	0	2010	2019
Renal Cell Carcinoma	C0007134	DIABLO	56616	Q9NR28	diablo IAP-binding mitochondrial protein		108	0.555	0.692	2.5722e-06	0.03		1	3	0	2004	2008
[truncated: 1,558 more rows]

## Sheet: Renal carcinoma
Disease	Disease_id	Gene	Gene_id	UniProt	Gene_Full_Name	Protein_Class	N_diseases_g	DSI_g	DPI_g	pLI	Score_gda	EL_gda	EI_gda	N_PMIDs	N_SNPs_gda	First_Ref	Last_Ref
[truncated: 665 more rows]

[truncated: 100 more sheets: Renal Insufficiency, Renal fibrosis, Adrenal Gland Pheochromocytoma, metastatic renal carcinoma, Papillary Renal Cell Carcinoma, Renal glomerular disease, Chromophobe Renal Cell Carcinom, Renal cyst, Adrenal Cortical Adenoma, Metastatic Renal Cell Cancer, Metastatic Renal Cell Carcinoma, Renal interstitial fibrosis, Sarcomatoid Renal Carcinoma, Adrenal Cushing's syndrome, Childhood Renal Cell Carcinoma, Simple renal cyst, Renal dysplasia, Adrenal Gland Neoplasms, Adrenal gland hypofunction, Congenital adrenal hyperplasia …]
