# Supplementary material for: A Network Pharmacology and Molecular-Docking-Based Approach to Identify the Probable Targets of Short-Chain Fatty-Acid-Producing Microbial Metabolites against Kidney Cancer and Inflammation
Source: Biomolecules. 2023 Nov 20;13(11):1678. doi: 10.3390/biom13111678 (PMC10669250; doi:10.3390/biom13111678)
Supplement: Supplementary file 1 [file biomolecules-13-01678-s001.zip › supplementary/Supplementary S4. Molecular docking simulation results (between all selected compounds and targets).xlsx]

## Sheet: MDS-Final
Targets	Compond	Binging Energy	Hydrogen bond	Other bond	Grid Box Center	Dimension
IGF1R	2-Amino-1-methyl-6-phenylimidazo(4,5-b)pyridine_CID_1530	-7.4	MET	LEU, VAL, LYS, MET	x=20.89, y=3.76, Z= 45.48	x=74.703, y=55.85, Z= 62.013
	Isoquercetin_COMPOUND_CID_5280804	-7.9	MET, THR	GLY, ARG, LEU, SER
	Control_Belzutifan_Cancer_CID_117947097	-7.3	SER	LEU, ASP, MET, VAL
	Control_levofloxacin__inflammation_CID_149096	-7.6	LEU	MET, VAL, ILE
IL6	Isoquercetin_CID_5280804	-7.9	ALA, GLN, GLY, THR	VAL, GLU, PRO	x=16.06, y=14.52, z=22.37	x= 64.69, y= 83.398, z=56.699
	Belzutifan_Cancer_CID_117947097	-7.5	ARG, LEU, SER, TRP	ALA, LEU, ARG, VAL
	levofloxacin__inflammation_CID_149096	-7.5	HIS, LEU	SER, GLY, THR
MTOR	2fap_Glycocholic acid_COMPOUND_CID_10140	-6.5	TYR		x=-6.45, y=21.63, z=43.68	x= 35.723, y=45.28, z= 33.53
	2fap_Belzutifan_Cancer_COMPOUND_CID_117947097	-7.4	GLU	PHE
	2fap_levofloxacin__inflammation_COMPOUND_CID_149096	-6.3	GLU	TYR, ILE, VAL
PIK3CA	5dxt.p_11-Methoxycurvularin_COMPOUND_CID_10381440	-8.2	GLN, SER	VAL, GLU, PRO	x=-1.83, y=5.71, z=17.04	x= 79.48, y= 96.48, z= 89.84
	5dxt.p_Glycocholic acid_COMPOUND_CID_10140	-9.3	MET, GLU, ASP
	5dxt.p_Isoquercetin_CID_5280804	-8.4	GLN, LYN, SER, ASN	ASP
	5dxt.p_Belzutifan__CID_117947097	-7.3	ARG, HIS	SER, PHE, LEU
	5dxt.p_levofloxacin__inflammation_COMPOUND_CID_149096	-8.1	ARG, ASN	GLU, LEU, GLN
PTGS2	5ikq.pp_Isoquercetin_COMPOUND_CID_5280804	-9.5	TYR, ASN	PRO, CYS, ASP	x= 27.154, y=38.38, z= 41.79	x= 82.98, y= 83.28, z= 104.06
	5ikq.pp_Belzutifan_Cancer_COMPOUND_CID_117947097	-9.1	ARG, GLN, ASN	LEU, GLY, PHE
	5ikq.pp_levofloxacin__inflammation_COMPOUND_CID_149096	-9	CYS	PRO, TYR, GLN

## Sheet: CTNBB1_1JDH MDS
Ligand	Binding Affinity
2-hydroxy-3-(5-hydroxy-1H-indol-3-yl)propanoic acid_COMPOUND_CID_192215	-5.9
3-(3,4-Dihydroxyphenyl)propionic acid_COMPOUND_CID_348154	-5.5
3-Hydroxy-4-methoxybenzenepropanoic acid_COMPOUND_CID_2752054	-5.7
Indole-3-lactic acid_COMPOUND_CID_92904	-5.9
Belzutifan_Cancer_COMPOUND_CID_117947097	-7.4
levofloxacin__inflammation_COMPOUND_CID_149096	-6.4

## Sheet: ERBB2_A91_MDS
Ligand	Binding Affinity
1-Caffeoylglycerol_COMPOUND_CID_5315606	-6.6
2-hydroxy-3-(5-hydroxy-1H-indol-3-yl)propanoic acid_COMPOUND_CID_192215	-5.8
3-Hydroxy-4-methoxybenzenepropanoic acid_COMPOUND_CID_2752054	-6
4-Hydroxy-(3',4'-dihydroxyphenyl)-valeric acid_COMPOUND_CID_52920332	-6.4
Caffeic Acid_COMPOUND_CID_689043	-6.7
Ethyl phenyllactate, (-)-_COMPOUND_CID_9877619	-5.5
Hydroquinone_COMPOUND_CID_785	-4.9
Indole-3-lactic acid_COMPOUND_CID_92904	-6
Belzutifan_Cancer_COMPOUND_CID_117947097	-8.7
levofloxacin__inflammation_COMPOUND_CID_149096	-8.3

## Sheet: IGF1R_5FXQ_MDS
Ligand	Binding Affinity
2-Amino-1-methyl-6-phenylimidazo(4,5-b)pyridine_COMPOUND_CID_1530	-7.4
3-(3,4-Dihydroxyphenyl)-2-hydroxypropanoic acid_COMPOUND_CID_439435	-5.7
3-(3-Hydroxyphenyl)propanoic acid_COMPOUND_CID_91	-5.8
3-(4-Hydroxyphenyl)propionic acid_COMPOUND_CID_10394	-5.5
3,4-Dihydroxybenzoic acid_COMPOUND_CID_72	-5.4
3,4-Dihydroxyphenylacetic acid_COMPOUND_CID_547	-5.4
3-Hydroxy-4-methoxybenzenepropanoic acid_COMPOUND_CID_2752054	-5.7
3-Hydroxybenzoic acid_COMPOUND_CID_7420	-5.1
4-Hydroxy-(3',4'-dihydroxyphenyl)-valeric acid_COMPOUND_CID_52920332	-6.3
4-Hydroxybenzoic acid_COMPOUND_CID_135	-5
Dihydrocaffeic acid 348154, HMDB0000423, CHEBI48400	-6
Ethyl phenyllactate, (-)-_COMPOUND_CID_9877619	-5.3
Glutathione_COMPOUND_CID_124886	-5
Isoquercetin_COMPOUND_CID_5280804	-7.9
Phenolic acid_COMPOUND_CID_338	-5.3
Belzutifan_Cancer_COMPOUND_CID_117947097	-7.3
levofloxacin__inflammation_COMPOUND_CID_149096	-7.6

## Sheet: IL6_4ZS7_MDS
Ligand	Binding Affinity
4zs7.p_Acetate_COMPOUND_CID_175	-2.9
4zs7.p_Butyrate_COMPOUND_CID_104775	-3.7
4zs7.p_Isoquercetin_COMPOUND_CID_5280804	-7.9
4zs7.p_Propionate_COMPOUND_CID_104745	-3.3
4zs7.p_Belzutifan_Cancer_COMPOUND_CID_117947097	-7.5
4zs7.p_levofloxacin__inflammation_COMPOUND_CID_149096	-7.5

## Sheet: MTOR_2FAP_MDS
Ligand	Binding Affinity
2fap_11-Methoxycurvularin_COMPOUND_CID_10381440	-5.5
2fap_Dihydrodaidzein_COMPOUND_CID_176907	-6
2fap_Glycocholic acid_COMPOUND_CID_10140	-6.5
2fap_Belzutifan_Cancer_COMPOUND_CID_117947097	-7.4
2fap_levofloxacin__inflammation_COMPOUND_CID_149096	-6.3

## Sheet: PIK3CA_5DXT_MDS
Ligand	Binding Affinity
5dxt.p_3-Hydroxyphenethyl alcohol_COMPOUND_CID_83404	-5.4
5dxt.p_11-Methoxycurvularin_COMPOUND_CID_10381440	-8.2
5dxt.p_Caffeic Acid_COMPOUND_CID_689043	-6.8
5dxt.p_Glycocholic acid_COMPOUND_CID_10140	-9.3
5dxt.p_Isoquercetin_COMPOUND_CID_5280804	-8.4
5dxt.p_Belzutifan_Cancer_COMPOUND_CID_117947097	-7.3
5dxt.p_levofloxacin__inflammation_COMPOUND_CID_149096	-8.1

## Sheet: PTGS2_5IKQ_MDS
Ligand	Binding Affinity
5ikq.pp_(R)-3-(4-Hydroxyphenyl)lactate_COMPOUND_CID_9548632	-6.3
5ikq.pp_1-Caffeoylglycerol_COMPOUND_CID_5315606	-7.7
5ikq.pp_2-(4-Hydroxyphenyl)propionic acid, (2S)-_COMPOUND_CID_6971268	-6.6
5ikq.pp_2-Hydroxy-3-(4-hydroxyphenyl)propanoic acid_COMPOUND_CID_9378	-6.5
5ikq.pp_2-hydroxy-3-(5-hydroxy-1H-indol-3-yl)propanoic acid_COMPOUND_CID_192215	-7.4
5ikq.pp_3-(3,4-Dihydroxyphenyl)-2-hydroxypropanoic acid_COMPOUND_CID_439435	-6.8
5ikq.pp_3-(3-Hydroxyphenyl)propanoic acid_COMPOUND_CID_91	-6.5
5ikq.pp_3-(4-Hydroxyphenyl)propionic acid_COMPOUND_CID_10394	-6.7
5ikq.pp_3,4-Dihydroxybenzoic acid_COMPOUND_CID_72	-6
5ikq.pp_3,4-Dihydroxyphenylacetic acid_COMPOUND_CID_547	-6.3
5ikq.pp_3-Hydroxy-4-methoxybenzenepropanoic acid_COMPOUND_CID_2752054	-6.4
5ikq.pp_3-Hydroxybenzoic acid_COMPOUND_CID_7420	-5.8
5ikq.pp_3-Hydroxyphenethyl alcohol_COMPOUND_CID_83404	-5.9
5ikq.pp_3-Phenylpropionic acid_COMPOUND_CID_107	-6.3
5ikq.pp_4-Hydroxy-(3',4'-dihydroxyphenyl)-valeric acid_COMPOUND_CID_52920332	-7.1
5ikq.pp_4-Hydroxybenzoic acid_COMPOUND_CID_135	-6
5ikq.pp_4-Hydroxyphenylacetic acid_COMPOUND_CID_127	-6.4
5ikq.pp_Caffeic Acid_COMPOUND_CID_689043	-6.8
5ikq.pp_Dihydrocaffeic acid 348154, HMDB0000423, CHEBI48400	-6.7
5ikq.pp_D-Lactic acid_COMPOUND_CID_61503	-4.1
5ikq.pp_Ethyl phenyllactate, (-)-_COMPOUND_CID_9877619	-6.2
5ikq.pp_Isobutyric acid_COMPOUND_CID_6590	-4.1
5ikq.pp_Isoquercetin_COMPOUND_CID_5280804	-9.5
5ikq.pp_Leucine_COMPOUND_CID_6106	-4.8
5ikq.pp_Phenolic acid_COMPOUND_CID_338	-5.8
5ikq.pp_Phenylacetic Acid_COMPOUND_CID_999	-5.9
5ikq.pp_Pipecolic acid_COMPOUND_CID_849	-5.6
5ikq.pp_Proline_COMPOUND_CID_145742	-5
5ikq.pp_Quinic acid_COMPOUND_CID_6508	-6.3
5ikq.pp_Belzutifan_Cancer_COMPOUND_CID_117947097	-9.1
5ikq.pp_levofloxacin__inflammation_COMPOUND_CID_149096	-9

## Sheet: RELA_2O61_MDS
Ligand	Binding Affinity
2o61.pp_1-Caffeoylglycerol_COMPOUND_CID_5315606	-6.2
2o61.pp_Caffeic Acid_COMPOUND_CID_689043	-5.7
2o61.pp_Belzutifan_Cancer_COMPOUND_CID_117947097	-6.7
2o61.pp_levofloxacin__inflammation_COMPOUND_CID_149096	-6.9

## Sheet: TP53_1C26_MDS
Ligand	Binding Affinity
1c26_tp53_Bile acid_COMPOUND_CID_439520	-6
1c26_tp53_Belzutifan_Cancer_COMPOUND_CID_117947097	-6.8
1c26_tp53_p_levofloxacin__inflammation_COMPOUND_CID_149096	-6.3
