# Supplementary material for: A Network Pharmacology and Molecular-Docking-Based Approach to Identify the Probable Targets of Short-Chain Fatty-Acid-Producing Microbial Metabolites against Kidney Cancer and Inflammation
Source: Biomolecules. 2023 Nov 20;13(11):1678. doi: 10.3390/biom13111678 (PMC10669250; doi:10.3390/biom13111678)
Supplement: Supplementary file 1 [file biomolecules-13-01678-s001.zip › supplementary/Supplementary S5. GO and KEGG pathway analysis.xlsx]

## Sheet: BP
1	cellular process (GO:0009987)	29	0.744	0.244
2	localization (GO:0051179)	6	0.154	0.05
3	biological process involved in interspecies interaction between organisms (GO:0044419)	1	0.026	0.008
4	biological regulation (GO:0065007)	19	0.487	0.16
5	response to stimulus (GO:0050896)	14	0.359	0.118
6	signaling (GO:0023052)	10	0.256	0.084
7	developmental process (GO:0032502)	5	0.128	0.042
8	multicellular organismal process (GO:0032501)	8	0.205	0.067
9	biological adhesion (GO:0022610)	1	0.026	0.008
10	locomotion (GO:0040011)	2	0.051	0.017
11	metabolic process (GO:0008152)	22	0.564	0.185
12	immune system process (GO:0002376)	2	0.051	0.017

## Sheet: MF
1	transcription regulator activity (GO:0140110)	4	0.103	0.087
2	molecular transducer activity (GO:0060089)	7	0.179	0.152
3	molecular adaptor activity (GO:0060090)	1	0.026	0.022
4	binding (GO:0005488)	11	0.282	0.239
5	molecular function regulator (GO:0098772)	1	0.026	0.022
6	catalytic activity (GO:0003824)	20	0.513	0.435
7	transporter activity (GO:0005215)	2	0.051	0.043

## Sheet: CC
1	cellular anatomical entity (GO:0110165)	25	0.641	0.758
2	protein-containing complex (GO:0032991)	8	0.205	0.242

## Sheet: KEGG
1	Axon guidance mediated by netrin (P00009)	1	0.026	0.015
2	Apoptosis signaling pathway (P00006)	3	0.077	0.046
3	Interleukin signaling pathway (P00036)	3	0.077	0.046
4	Angiogenesis (P00005)	3	0.077	0.046
5	Alzheimer disease-presenilin pathway (P00004)	1	0.026	0.015
6	Integrin signalling pathway (P00034)	1	0.026	0.015
7	Insulin/IGF pathway-protein kinase B signaling cascade (P00033)	2	0.051	0.031
8	Insulin/IGF pathway-mitogen activated protein kinase kinase/MAP kinase cascade (P00032)	1	0.026	0.015
9	Inflammation mediated by chemokine and cytokine signaling pathway (P00031)	5	0.128	0.077
10	Hypoxia response via HIF activation (P00030)	3	0.077	0.046
11	p53 pathway feedback loops 2 (P04398)	3	0.077	0.046
12	Endothelin signaling pathway (P00019)	2	0.051	0.031
13	p53 pathway by glucose deprivation (P04397)	2	0.051	0.031
14	EGF receptor signaling pathway (P00018)	2	0.051	0.031
15	Gonadotropin-releasing hormone receptor pathway (P06664)	4	0.103	0.062
16	PI3 kinase pathway (P00048)	1	0.026	0.015
17	PDGF signaling pathway (P00047)	2	0.051	0.031
18	Ras Pathway (P04393)	1	0.026	0.015
19	P53 pathway feedback loops 1 (P04392)	1	0.026	0.015
20	Nicotinic acetylcholine receptor signaling pathway (P00044)	3	0.077	0.046
21	Muscarinic acetylcholine receptor 2 and 4 signaling pathway (P00043)	2	0.051	0.031
22	Cadherin signaling pathway (P00012)	2	0.051	0.031
23	Muscarinic acetylcholine receptor 1 and 3 signaling pathway (P00042)	2	0.051	0.031
24	B cell activation (P00010)	1	0.026	0.015
25	CCKR signaling map (P06959)	2	0.051	0.031
26	Huntington disease (P00029)	1	0.026	0.015
27	p53 pathway (P00059)	2	0.051	0.031
28	Wnt signaling pathway (P00057)	2	0.051	0.031
29	VEGF signaling pathway (P00056)	2	0.051	0.031
30	5-Hydroxytryptamine degredation (P04372)	1	0.026	0.015
31	Toll receptor signaling pathway (P00054)	2	0.051	0.031
32	T cell activation (P00053)	1	0.026	0.015
33	FGF signaling pathway (P00021)	1	0.026	0.015
