# Supplementary material for: A Network Pharmacology and Molecular-Docking-Based Approach to Identify the Probable Targets of Short-Chain Fatty-Acid-Producing Microbial Metabolites against Kidney Cancer and Inflammation
Source: Biomolecules. 2023 Nov 20;13(11):1678. doi: 10.3390/biom13111678 (PMC10669250; doi:10.3390/biom13111678)
Supplement: Supplementary file 1 [file biomolecules-13-01678-s001.zip › supplementary/Supplementary S6. PPI network analysis. Top 20 targets selection..xlsx]

## Sheet: 38 targets_String
#node1	node2	node1_string_id	node2_string_id	neighborhood_on_chromosome	gene_fusion	phylogenetic_cooccurrence	homology	coexpression	experimentally_determined_interaction	database_annotated	automated_textmining	combined_score
ACHE	PTGS2	9606.ENSP00000303211	9606.ENSP00000356438	0	0	0	0	0	0.059	0	0.467	0.477
ACHE	IL6	9606.ENSP00000303211	9606.ENSP00000385675	0	0	0	0	0	0	0	0.536	0.536
ALDH1A1	TP53	9606.ENSP00000297785	9606.ENSP00000269305	0	0	0	0	0	0	0	0.517	0.517
ALDH1A1	ERBB2	9606.ENSP00000297785	9606.ENSP00000269571	0	0	0	0	0	0	0	0.614	0.614
ALDH1A1	MET	9606.ENSP00000297785	9606.ENSP00000317272	0	0	0	0	0.049	0.057	0	0.423	0.437
ALDH1A1	CTNNB1	9606.ENSP00000297785	9606.ENSP00000344456	0	0	0	0	0	0	0	0.633	0.633
ALDH1A1	CYP1A1	9606.ENSP00000297785	9606.ENSP00000369050	0	0	0	0	0.063	0.061	0.9	0.334	0.933
ALK	PIK3CA	9606.ENSP00000373700	9606.ENSP00000263967	0	0	0	0	0.062	0.104	0.8	0.763	0.954
ALK	TP53	9606.ENSP00000373700	9606.ENSP00000269305	0	0	0	0	0	0.056	0	0.71	0.714
ALK	ERBB2	9606.ENSP00000373700	9606.ENSP00000269571	0	0	0	0.565	0.049	0.415	0	0.826	0.626
ALK	MET	9606.ENSP00000373700	9606.ENSP00000317272	0	0	0	0.567	0.049	0.278	0	0.738	0.509
ALK	CTNNB1	9606.ENSP00000373700	9606.ENSP00000344456	0	0	0	0	0	0.142	0	0.687	0.721
ALK	MTOR	9606.ENSP00000373700	9606.ENSP00000354558	0	0	0	0	0.062	0.104	0	0.506	0.548
ALOX5	TP53	9606.ENSP00000363512	9606.ENSP00000269305	0	0	0	0	0	0	0	0.475	0.475
ALOX5	PTGS1	9606.ENSP00000363512	9606.ENSP00000354612	0	0	0	0	0.096	0	0.9	0.728	0.973
ALOX5	PTGS2	9606.ENSP00000363512	9606.ENSP00000356438	0	0	0	0	0.081	0	0.9	0.828	0.982
ALOX5	IL6	9606.ENSP00000363512	9606.ENSP00000385675	0	0	0	0	0	0	0	0.601	0.601
AURKA	RBX1	9606.ENSP00000216911	9606.ENSP00000216225	0	0	0	0	0.062	0	0.6	0.183	0.666
AURKA	NFKBIA	9606.ENSP00000216911	9606.ENSP00000216797	0	0	0	0	0.063	0.282	0.9	0.166	0.936
AURKA	PIK3CA	9606.ENSP00000216911	9606.ENSP00000263967	0	0	0	0	0	0.1	0	0.471	0.504
AURKA	CTNNB1	9606.ENSP00000216911	9606.ENSP00000344456	0	0	0	0	0.054	0.246	0	0.488	0.603
AURKA	VHL	9606.ENSP00000216911	9606.ENSP00000256474	0	0	0	0	0	0.486	0	0.698	0.838
AURKA	TP53	9606.ENSP00000216911	9606.ENSP00000269305	0	0	0	0	0.096	0.875	0.9	0.935	0.999
BCHE	IL6	9606.ENSP00000264381	9606.ENSP00000385675	0	0	0	0	0	0	0	0.46	0.46
CASP2	TP53	9606.ENSP00000312664	9606.ENSP00000269305	0	0	0	0	0.085	0	0	0.85	0.857
CRYAB	TP53	9606.ENSP00000433560	9606.ENSP00000269305	0	0	0	0	0	0.486	0	0.767	0.875
CRYAB	CTNNB1	9606.ENSP00000433560	9606.ENSP00000344456	0	0	0	0	0	0.673	0	0.514	0.834
CRYAB	MTOR	9606.ENSP00000433560	9606.ENSP00000354558	0	0	0	0	0	0	0	0.448	0.448
CRYAB	LDHB	9606.ENSP00000433560	9606.ENSP00000379386	0	0	0	0	0.062	0.056	0	0.409	0.431
CTNNB1	KEAP1	9606.ENSP00000344456	9606.ENSP00000171111	0	0	0	0	0	0	0	0.464	0.464
CTNNB1	VCL	9606.ENSP00000344456	9606.ENSP00000211998	0	0	0	0	0.063	0.755	0.9	0.993	0.999
CTNNB1	SIRT1	9606.ENSP00000344456	9606.ENSP00000212015	0	0	0	0	0.062	0.282	0	0.834	0.879
CTNNB1	RBX1	9606.ENSP00000344456	9606.ENSP00000216225	0	0	0	0	0.052	0.27	0.6	0.384	0.806
CTNNB1	NFKBIA	9606.ENSP00000344456	9606.ENSP00000216797	0	0	0	0	0	0.056	0	0.563	0.57
CTNNB1	VHL	9606.ENSP00000344456	9606.ENSP00000256474	0	0	0	0	0	0.27	0	0.503	0.622
CTNNB1	PIK3CA	9606.ENSP00000344456	9606.ENSP00000263967	0	0	0	0	0.082	0.123	0.9	0.735	0.975
CTNNB1	IGF1R	9606.ENSP00000344456	9606.ENSP00000268035	0	0	0	0	0.062	0.386	0.9	0.842	0.989
CTNNB1	TP53	9606.ENSP00000344456	9606.ENSP00000269305	0	0	0	0	0	0	0	0.863	0.863
CTNNB1	ERBB2	9606.ENSP00000344456	9606.ENSP00000269571	0	0	0	0	0	0.76	0.9	0.989	0.999
CTNNB1	FLT1	9606.ENSP00000344456	9606.ENSP00000282397	0	0	0	0	0	0.686	0	0.506	0.838
CTNNB1	MITF	9606.ENSP00000344456	9606.ENSP00000295600	0	0	0	0	0	0.213	0	0.866	0.89
CTNNB1	LRRK2	9606.ENSP00000344456	9606.ENSP00000298910	0	0	0	0	0	0.364	0.72	0.259	0.856
CTNNB1	MET	9606.ENSP00000344456	9606.ENSP00000317272	0	0	0	0	0.063	0.518	0.9	0.891	0.994
CTNNB1	PBRM1	9606.ENSP00000344456	9606.ENSP00000378307	0	0	0	0	0.064	0.117	0	0.339	0.406
CTNNB1	LDHB	9606.ENSP00000344456	9606.ENSP00000379386	0	0	0	0	0.062	0.313	0	0.23	0.46
CTNNB1	TGM2	9606.ENSP00000344456	9606.ENSP00000355330	0	0	0	0	0	0	0	0.474	0.474
CTNNB1	SLC2A1	9606.ENSP00000344456	9606.ENSP00000416293	0	0	0	0	0	0.056	0	0.473	0.481
CTNNB1	IL6	9606.ENSP00000344456	9606.ENSP00000385675	0	0	0	0	0	0	0	0.692	0.692
CTNNB1	MTOR	9606.ENSP00000344456	9606.ENSP00000354558	0	0	0	0	0	0.056	0	0.688	0.693
CTNNB1	PTGS2	9606.ENSP00000344456	9606.ENSP00000356438	0	0	0	0	0	0.27	0	0.737	0.8
CTNNB1	RELA	9606.ENSP00000344456	9606.ENSP00000384273	0	0	0	0	0	0.592	0	0.816	0.922
CTSB	CTSD	9606.ENSP00000345672	9606.ENSP00000236671	0	0	0	0	0.225	0.677	0.5	0.899	0.985
CTSB	TP53	9606.ENSP00000345672	9606.ENSP00000269305	0	0	0	0	0.062	0	0	0.46	0.471
CTSB	ERBB2	9606.ENSP00000345672	9606.ENSP00000269571	0	0	0	0	0	0	0	0.414	0.414
CTSB	IL6	9606.ENSP00000345672	9606.ENSP00000385675	0	0	0	0	0.076	0	0	0.561	0.577
CTSD	HSPD1	9606.ENSP00000236671	9606.ENSP00000373620	0	0	0	0	0.144	0.246	0	0.182	0.426
CTSD	MTOR	9606.ENSP00000236671	9606.ENSP00000354558	0	0	0	0	0	0.106	0	0.427	0.466
CTSD	TGM2	9606.ENSP00000236671	9606.ENSP00000355330	0	0	0	0	0.062	0	0	0.485	0.497
CTSD	TP53	9606.ENSP00000236671	9606.ENSP00000269305	0	0	0	0	0	0	0	0.518	0.518
CTSD	LDHB	9606.ENSP00000236671	9606.ENSP00000379386	0	0	0	0	0.063	0.401	0	0.225	0.527
CTSD	LRRK2	9606.ENSP00000236671	9606.ENSP00000298910	0	0	0	0	0.063	0.316	0	0.358	0.553
CTSD	ERBB2	9606.ENSP00000236671	9606.ENSP00000269571	0	0	0	0	0	0	0	0.559	0.559
CYP1A1	KEAP1	9606.ENSP00000369050	9606.ENSP00000171111	0	0	0	0	0	0.159	0	0.381	0.457
CYP1A1	TP53	9606.ENSP00000369050	9606.ENSP00000269305	0	0	0	0	0	0.058	0	0.56	0.568
CYP1A1	GSTM1	9606.ENSP00000369050	9606.ENSP00000311469	0	0	0	0	0.062	0.057	0.65	0.87	0.954
CYP1A1	PTGS2	9606.ENSP00000369050	9606.ENSP00000356438	0	0	0	0	0.053	0	0	0.483	0.489
CYP1A1	IL6	9606.ENSP00000369050	9606.ENSP00000385675	0	0	0	0	0	0	0	0.48	0.48
CYP1A1	GSTP1	9606.ENSP00000369050	9606.ENSP00000381607	0	0	0	0	0	0.057	0.65	0.763	0.915
DAPK1	TP53	9606.ENSP00000386135	9606.ENSP00000269305	0	0	0	0	0	0.345	0	0.919	0.944
DAPK1	LRRK2	9606.ENSP00000386135	9606.ENSP00000298910	0	0	0	0.54	0.063	0.298	0	0.387	0.428
DAPK1	MTOR	9606.ENSP00000386135	9606.ENSP00000354558	0	0	0	0	0.062	0.101	0	0.369	0.421
DAPK1	GSTP1	9606.ENSP00000386135	9606.ENSP00000381607	0	0	0	0	0	0	0	0.688	0.688
ERBB2	VCL	9606.ENSP00000269571	9606.ENSP00000211998	0	0	0	0	0.062	0	0	0.449	0.462
ERBB2	NFKBIA	9606.ENSP00000269571	9606.ENSP00000216797	0	0	0	0	0	0.063	0	0.392	0.405
ERBB2	PIK3CA	9606.ENSP00000269571	9606.ENSP00000263967	0	0	0	0	0	0.12	0.9	0.875	0.988
ERBB2	IGF1R	9606.ENSP00000269571	9606.ENSP00000268035	0	0	0	0.565	0	0.534	0	0.99	0.734
ERBB2	TP53	9606.ENSP00000269571	9606.ENSP00000269305	0	0	0	0	0	0.129	0	0.878	0.889
ERBB2	SLC2A1	9606.ENSP00000269571	9606.ENSP00000416293	0	0	0	0	0	0	0	0.422	0.422
ERBB2	GSTP1	9606.ENSP00000269571	9606.ENSP00000381607	0	0	0	0	0.062	0	0	0.414	0.426
ERBB2	FLT1	9606.ENSP00000269571	9606.ENSP00000282397	0	0	0	0.558	0.054	0.356	0	0.66	0.545
ERBB2	MET	9606.ENSP00000269571	9606.ENSP00000317272	0	0	0	0.579	0.092	0.345	0	0.814	0.59
ERBB2	PTGS2	9606.ENSP00000269571	9606.ENSP00000356438	0	0	0	0	0.062	0.27	0	0.601	0.702
ERBB2	MTOR	9606.ENSP00000269571	9606.ENSP00000354558	0	0	0	0	0.049	0.058	0	0.71	0.717
ERBB2	IL6	9606.ENSP00000269571	9606.ENSP00000385675	0	0	0	0	0	0	0.9	0.673	0.965
FLT1	PIK3CA	9606.ENSP00000282397	9606.ENSP00000263967	0	0	0	0	0	0.306	0.9	0.469	0.959
FLT1	TP53	9606.ENSP00000282397	9606.ENSP00000269305	0	0	0	0	0	0	0	0.532	0.532
FLT1	PTGS2	9606.ENSP00000282397	9606.ENSP00000356438	0	0	0	0	0	0	0	0.45	0.45
FLT1	MTOR	9606.ENSP00000282397	9606.ENSP00000354558	0	0	0	0	0	0.097	0	0.468	0.499
FLT1	IL6	9606.ENSP00000282397	9606.ENSP00000385675	0	0	0	0	0	0	0	0.572	0.572
GSTM1	KEAP1	9606.ENSP00000311469	9606.ENSP00000171111	0	0	0	0	0	0	0	0.511	0.511
GSTM1	TP53	9606.ENSP00000311469	9606.ENSP00000269305	0	0	0	0	0	0	0	0.556	0.556
GSTM1	GSTP1	9606.ENSP00000311469	9606.ENSP00000381607	0	0	0	0.782	0	0	0.65	0.927	0.72
GSTP1	KEAP1	9606.ENSP00000381607	9606.ENSP00000171111	0	0	0	0	0.062	0	0	0.56	0.57
GSTP1	NFKBIA	9606.ENSP00000381607	9606.ENSP00000216797	0	0	0	0	0.062	0.091	0	0.692	0.714
GSTP1	PIK3CA	9606.ENSP00000381607	9606.ENSP00000263967	0	0	0	0	0	0	0	0.445	0.445
GSTP1	TP53	9606.ENSP00000381607	9606.ENSP00000269305	0	0	0	0	0	0	0	0.665	0.665
GSTP1	TGM2	9606.ENSP00000381607	9606.ENSP00000355330	0	0	0	0	0	0.27	0	0.367	0.518
GSTP1	PTGS2	9606.ENSP00000381607	9606.ENSP00000356438	0	0	0	0	0	0	0	0.501	0.501
GSTP1	LDHB	9606.ENSP00000381607	9606.ENSP00000379386	0	0	0	0	0.226	0.609	0	0.227	0.745
HSPD1	TP53	9606.ENSP00000373620	9606.ENSP00000269305	0	0	0	0	0.063	0.27	0	0.515	0.64
HSPD1	LRRK2	9606.ENSP00000373620	9606.ENSP00000298910	0	0	0	0	0	0.368	0	0.116	0.418
HSPD1	LDHB	9606.ENSP00000373620	9606.ENSP00000379386	0	0	0	0	0.196	0.144	0	0.275	0.458
HSPD1	IL6	9606.ENSP00000373620	9606.ENSP00000385675	0	0	0	0	0	0	0	0.469	0.469
IGF1R	SIRT1	9606.ENSP00000268035	9606.ENSP00000212015	0	0	0	0	0	0	0	0.649	0.649
IGF1R	PIK3CA	9606.ENSP00000268035	9606.ENSP00000263967	0	0	0	0	0.063	0.146	0.9	0.889	0.989
IGF1R	PTGS2	9606.ENSP00000268035	9606.ENSP00000356438	0	0	0	0	0	0.148	0	0.4	0.466
IGF1R	IL6	9606.ENSP00000268035	9606.ENSP00000385675	0	0	0	0	0	0	0	0.527	0.527
IGF1R	TP53	9606.ENSP00000268035	9606.ENSP00000269305	0	0	0	0	0	0.281	0	0.686	0.764
IGF1R	SLC2A1	9606.ENSP00000268035	9606.ENSP00000416293	0	0	0	0	0	0.105	0	0.784	0.799
IGF1R	MTOR	9606.ENSP00000268035	9606.ENSP00000354558	0	0	0	0	0.067	0.187	0	0.789	0.826
IL6	KEAP1	9606.ENSP00000385675	9606.ENSP00000171111	0	0	0	0	0	0	0	0.539	0.539
IL6	SIRT1	9606.ENSP00000385675	9606.ENSP00000212015	0	0	0	0	0	0	0	0.679	0.679
IL6	NFKBIA	9606.ENSP00000385675	9606.ENSP00000216797	0	0	0	0	0.11	0	0	0.862	0.872
IL6	SCARB1	9606.ENSP00000385675	9606.ENSP00000261693	0	0	0	0	0	0	0	0.422	0.422
IL6	TP53	9606.ENSP00000385675	9606.ENSP00000269305	0	0	0	0	0.062	0	0	0.738	0.744
IL6	MITF	9606.ENSP00000385675	9606.ENSP00000295600	0	0	0	0	0	0	0.9	0.269	0.923
IL6	MET	9606.ENSP00000385675	9606.ENSP00000317272	0	0	0	0	0.07	0	0	0.889	0.893
IL6	MTOR	9606.ENSP00000385675	9606.ENSP00000354558	0	0	0	0	0	0	0	0.687	0.687
IL6	PTGS1	9606.ENSP00000385675	9606.ENSP00000354612	0	0	0	0	0.096	0	0	0.54	0.566
IL6	TGM2	9606.ENSP00000385675	9606.ENSP00000355330	0	0	0	0	0.096	0	0	0.466	0.497
IL6	PTGS2	9606.ENSP00000385675	9606.ENSP00000356438	0	0	0	0	0.312	0	0	0.878	0.913
IL6	RELA	9606.ENSP00000385675	9606.ENSP00000384273	0	0	0	0	0	0.27	0.9	0.707	0.976
IL6	SLC2A1	9606.ENSP00000385675	9606.ENSP00000416293	0	0	0	0	0	0	0	0.502	0.502
KCNMA1	VCL	9606.ENSP00000286628	9606.ENSP00000211998	0	0	0	0	0.138	0.223	0	0.196	0.414
KDM5C	PIK3CA	9606.ENSP00000364550	9606.ENSP00000263967	0	0	0	0	0.064	0	0	0.391	0.406
KDM5C	TP53	9606.ENSP00000364550	9606.ENSP00000269305	0	0	0	0	0	0	0	0.425	0.424
KDM5C	PBRM1	9606.ENSP00000364550	9606.ENSP00000378307	0	0	0	0	0.149	0.301	0	0.757	0.843
KEAP1	PIK3CA	9606.ENSP00000171111	9606.ENSP00000263967	0	0	0	0	0	0.091	0	0.46	0.488
KEAP1	NFKBIA	9606.ENSP00000171111	9606.ENSP00000216797	0	0	0	0	0	0.056	0	0.494	0.502
KEAP1	PTGS2	9606.ENSP00000171111	9606.ENSP00000356438	0	0	0	0	0	0	0	0.543	0.543
KEAP1	SIRT1	9606.ENSP00000171111	9606.ENSP00000212015	0	0	0	0	0.062	0	0	0.571	0.58
KEAP1	TP53	9606.ENSP00000171111	9606.ENSP00000269305	0	0	0	0	0	0	0	0.783	0.783
KEAP1	MTOR	9606.ENSP00000171111	9606.ENSP00000354558	0	0	0	0	0	0.091	0	0.827	0.836
KEAP1	RELA	9606.ENSP00000171111	9606.ENSP00000384273	0	0	0	0	0.073	0.314	0	0.837	0.887
KEAP1	RBX1	9606.ENSP00000171111	9606.ENSP00000216225	0	0	0	0	0.045	0.875	0.9	0.99	0.999
LDHB	LRRK2	9606.ENSP00000379386	9606.ENSP00000298910	0.045	0	0	0	0.062	0.486	0	0.088	0.524
LDHB	SLC2A1	9606.ENSP00000379386	9606.ENSP00000416293	0.047	0	0	0	0.062	0.056	0	0.568	0.587
LRRK2	TP53	9606.ENSP00000298910	9606.ENSP00000269305	0	0	0	0	0	0.68	0	0.294	0.764
LRRK2	PTGS2	9606.ENSP00000298910	9606.ENSP00000356438	0	0	0	0	0.098	0.297	0	0.181	0.435
LRRK2	MTOR	9606.ENSP00000298910	9606.ENSP00000354558	0	0	0	0	0.161	0.353	0	0.426	0.662
MET	PIK3CA	9606.ENSP00000317272	9606.ENSP00000263967	0	0	0	0	0.063	0.104	0.9	0.753	0.976
MET	TP53	9606.ENSP00000317272	9606.ENSP00000269305	0	0	0	0	0	0.195	0	0.687	0.738
MET	MITF	9606.ENSP00000317272	9606.ENSP00000295600	0	0	0	0	0.07	0.057	0	0.421	0.447
MET	PTGS2	9606.ENSP00000317272	9606.ENSP00000356438	0	0	0	0	0.062	0.125	0	0.414	0.477
MET	MTOR	9606.ENSP00000317272	9606.ENSP00000354558	0	0	0	0	0.063	0.104	0	0.604	0.638
MITF	TP53	9606.ENSP00000295600	9606.ENSP00000269305	0	0	0	0	0	0.124	0	0.644	0.675
MITF	MTOR	9606.ENSP00000295600	9606.ENSP00000354558	0	0	0	0	0	0.058	0	0.555	0.563
MTOR	SIRT1	9606.ENSP00000354558	9606.ENSP00000212015	0	0	0	0	0.062	0.518	0	0.866	0.934
MTOR	NFKBIA	9606.ENSP00000354558	9606.ENSP00000216797	0	0	0	0	0.054	0.359	0	0.467	0.649
MTOR	VHL	9606.ENSP00000354558	9606.ENSP00000256474	0	0	0	0	0	0	0	0.425	0.424
MTOR	PIK3CA	9606.ENSP00000354558	9606.ENSP00000263967	0	0	0	0.541	0.062	0.347	0.9	0.782	0.957
MTOR	TP53	9606.ENSP00000354558	9606.ENSP00000269305	0	0	0	0	0	0.469	0	0.752	0.862
MTOR	PBRM1	9606.ENSP00000354558	9606.ENSP00000378307	0	0	0	0	0.112	0.203	0	0.334	0.488
MTOR	PTGS2	9606.ENSP00000354558	9606.ENSP00000356438	0	0	0	0	0	0.058	0	0.527	0.535
MTOR	SLC2A1	9606.ENSP00000354558	9606.ENSP00000416293	0	0	0	0	0.056	0	0	0.651	0.656
MTOR	RELA	9606.ENSP00000354558	9606.ENSP00000384273	0	0	0	0	0	0	0.9	0.362	0.933
NFKBIA	SIRT1	9606.ENSP00000216797	9606.ENSP00000212015	0	0	0	0	0.062	0.139	0	0.488	0.551
NFKBIA	RBX1	9606.ENSP00000216797	9606.ENSP00000216225	0	0	0	0	0	0.104	0.6	0.385	0.76
NFKBIA	PTGS2	9606.ENSP00000216797	9606.ENSP00000356438	0	0	0	0	0.076	0	0	0.787	0.795
NFKBIA	TP53	9606.ENSP00000216797	9606.ENSP00000269305	0	0	0	0	0	0.615	0	0.814	0.925
NFKBIA	PIK3CA	9606.ENSP00000216797	9606.ENSP00000263967	0	0	0	0	0.054	0.133	0.9	0.267	0.931
NFKBIA	TGM2	9606.ENSP00000216797	9606.ENSP00000355330	0	0	0	0	0.062	0.486	0	0.916	0.956
NFKBIA	RELA	9606.ENSP00000216797	9606.ENSP00000384273	0	0.003	0	0	0.085	0.998	0.9	0.989	0.999
PBRM1	VHL	9606.ENSP00000378307	9606.ENSP00000256474	0	0	0	0	0	0.176	0	0.454	0.531
PBRM1	PIK3CA	9606.ENSP00000378307	9606.ENSP00000263967	0	0	0	0	0.159	0.203	0	0.527	0.655
PBRM1	TP53	9606.ENSP00000378307	9606.ENSP00000269305	0	0	0	0	0	0.078	0	0.65	0.664
PIK3CA	VCL	9606.ENSP00000263967	9606.ENSP00000211998	0	0	0	0	0.063	0	0.9	0.262	0.924
PIK3CA	SIRT1	9606.ENSP00000263967	9606.ENSP00000212015	0	0	0	0	0.101	0.076	0	0.466	0.517
PIK3CA	PTGS2	9606.ENSP00000263967	9606.ENSP00000356438	0	0	0	0	0	0.058	0	0.393	0.403
PIK3CA	TP53	9606.ENSP00000263967	9606.ENSP00000269305	0	0	0	0	0	0.281	0	0.872	0.904
PIK3CA	RELA	9606.ENSP00000263967	9606.ENSP00000384273	0	0	0	0	0	0.27	0.9	0.313	0.945
PTGS1	PTGS2	9606.ENSP00000354612	9606.ENSP00000356438	0	0	0.432	0.967	0.14	0.27	0.8	0.901	0.869
PTGS2	SIRT1	9606.ENSP00000356438	9606.ENSP00000212015	0	0	0	0	0	0	0	0.52	0.52
PTGS2	TP53	9606.ENSP00000356438	9606.ENSP00000269305	0	0	0	0	0	0.874	0	0.958	0.994
PTGS2	SLC2A1	9606.ENSP00000356438	9606.ENSP00000416293	0	0	0	0	0.063	0	0	0.517	0.528
PTGS2	RELA	9606.ENSP00000356438	9606.ENSP00000384273	0	0	0	0	0	0	0	0.569	0.569
RBX1	TP53	9606.ENSP00000216225	9606.ENSP00000269305	0	0	0	0	0	0.2	0	0.468	0.556
RBX1	RELA	9606.ENSP00000216225	9606.ENSP00000384273	0	0	0	0	0.061	0	0.6	0.193	0.67
RBX1	VHL	9606.ENSP00000216225	9606.ENSP00000256474	0	0	0	0	0.049	0.974	0.9	0.943	0.999
RELA	SIRT1	9606.ENSP00000384273	9606.ENSP00000212015	0	0	0	0	0	0.684	0.8	0.981	0.998
RELA	TP53	9606.ENSP00000384273	9606.ENSP00000269305	0	0	0	0	0.062	0.451	0	0.964	0.98
RELA	TGM2	9606.ENSP00000384273	9606.ENSP00000355330	0	0	0	0	0.062	0.486	0	0.316	0.641
SCARB1	SIRT1	9606.ENSP00000261693	9606.ENSP00000212015	0	0	0	0	0	0	0	0.448	0.448
SIRT1	VHL	9606.ENSP00000212015	9606.ENSP00000256474	0	0	0	0	0	0.27	0	0.293	0.462
SIRT1	SLC2A1	9606.ENSP00000212015	9606.ENSP00000416293	0	0	0	0	0.062	0	0	0.48	0.491
SIRT1	TP53	9606.ENSP00000212015	9606.ENSP00000269305	0	0	0	0	0.062	0.884	0.9	0.989	0.999
SLC2A1	VHL	9606.ENSP00000416293	9606.ENSP00000256474	0	0	0	0	0	0.27	0	0.588	0.686
SLC2A1	TP53	9606.ENSP00000416293	9606.ENSP00000269305	0	0	0	0	0	0.13	0.8	0.608	0.925
TGM2	TP53	9606.ENSP00000355330	9606.ENSP00000269305	0	0	0	0	0	0.27	0	0.726	0.792
TP53	VCL	9606.ENSP00000269305	9606.ENSP00000211998	0	0	0	0	0	0	0	0.518	0.518
TP53	VHL	9606.ENSP00000269305	9606.ENSP00000256474	0	0	0	0	0	0.294	0	0.919	0.941

## Sheet: 38 targets_Cytoscape
node_name	MCC	DMNC	MNC	Degree	EPC	BottleNeck	EcCentricity	Closeness	Radiality	Betweenness	Stress	ClusteringCoefficient
TP53	98253	0.34883	34	35	20.354	19	0.5	38	3.97561	523.277	1248	0.23529
CTNNB1	97884	0.44031	26	26	19.985	6	0.5	33.5	3.7561	178.691	628	0.34462
IL6	52849	0.39691	22	23	18.423	9	0.33333	31.8333	3.65854	256.355	830	0.3004
MTOR	97536	0.49092	22	22	18.953	7	0.33333	31.3333	3.63415	89.4401	362	0.40693
PTGS2	96806	0.51586	20	20	18.496	3	0.33333	30.3333	3.58537	106.581	470	0.44211
PIK3CA	44958	0.5142	18	18	18.146	3	0.33333	29.3333	3.53659	60.4239	236	0.45752
ERBB2	10986	0.5181	17	17	18.029	2	0.5	29	3.53659	56.0155	236	0.47059
NFKBIA	82614	0.66441	14	14	17.266	1	0.33333	27.3333	3.43902	17.3971	100	0.64835
SIRT1	86522	0.6642	13	13	17.115	2	0.33333	26.8333	3.41463	34.4299	166	0.66667
KEAP1	80952	0.63865	13	13	16.674	2	0.33333	26.8333	3.41463	20.3392	92	0.64103
GSTP1	297	0.45891	10	11	14.715	3	0.33333	25.5	3.31707	26.2667	86	0.41818
RELA	80880	0.72963	11	11	16.274	1	0.33333	25.8333	3.36585	5.96061	40	0.78182
SLC2A1	10202	0.63848	10	10	15.479	1	0.33333	25.3333	3.34146	11.962	60	0.71111
MET	2304	0.63848	10	10	14.691	1	0.33333	25.3333	3.34146	8.60188	52	0.71111
IGF1R	11520	0.78759	9	9	15.605	1	0.33333	24.8333	3.31707	0.84127	8	0.91667
CTSD	32	0.34989	8	8	11.855	1	0.33333	23.6667	3.19512	10.881	38	0.42857
LRRK2	50	0.43736	8	8	12.043	1	0.33333	24	3.2439	9.86277	46	0.53571
VHL	168	0.52483	8	8	13.559	1	0.33333	23.8333	3.21951	5.54848	26	0.64286
TGM2	128	0.47564	7	7	12.706	1	0.33333	23.8333	3.26829	4.61991	28	0.61905
FLT1	1440	0.73175	7	7	13.753	1	0.33333	23.8333	3.26829	0.33333	4	0.95238
LDHB	13	0.28529	6	7	10.473	1	0.33333	22.6667	3.09756	8.81667	30	0.28571
RBX1	168	0.5854	7	7	13.084	1	0.33333	23.1667	3.17073	1.93333	10	0.7619
CYP1A1	74	0.47564	7	7	12.077	1	0.33333	23.8333	3.26829	8.62554	44	0.61905
PBRM1	54	0.52304	6	6	11.073	1	0.33333	22.6667	3.14634	2.86667	10	0.73333
AURKA	72	0.57059	6	6	11.816	1	0.33333	22.6667	3.14634	1	6	0.8
ALK	720	0.71324	6	6	11.825	1	0.33333	22.6667	3.14634	0	0	1
HSPD1	14	0.38896	5	5	8.973	1	0.33333	22.8333	3.21951	5.68261	36	0.6
MITF	120	0.64826	5	5	10.77	1	0.33333	22.8333	3.21951	0	0	1
VCL	25	0.56839	4	5	10.339	2	0.33333	22.3333	3.14634	80	216	0.6
ALDH1A1	26	0.45378	5	5	10.065	1	0.33333	22.1667	3.12195	1.3	6	0.7
DAPK1	8	0.37893	4	4	8.592	1	0.33333	21.6667	3.09756	0.78571	4	0.66667
GSTM1	24	0.56839	4	4	8.289	1	0.33333	21.6667	3.09756	0	0	1
CTSB	12	0.47366	4	4	9.242	1	0.33333	22.3333	3.19512	1.29848	10	0.83333
CRYAB	8	0.37893	4	4	8.953	1	0.33333	21.6667	3.09756	1.31429	10	0.66667
ALOX5	12	0.47366	4	4	8.663	1	0.33333	22.1667	3.17073	4.5487	30	0.83333
KDM5C	6	0.46346	3	3	7.478	1	0.33333	21	3.04878	0	0	1
PTGS1	6	0.46346	3	3	6.619	1	0.25	19.4167	2.80488	0	0	1
SCARB1	2	0.30779	2	2	5.791	1	0.25	18.75	2.7561	0	0	1
ACHE	2	0.30779	2	2	5.851	1	0.25	18.9167	2.78049	0	0	1
KCNMA1	1	0	1	1	2.341	1	0.25	14.6667	2.17073	0	0	0
CASP2	1	0	1	1	3.843	1	0.33333	20	3	0	0	0
BCHE	1	0	1	1	3.728	1	0.25	17.9167	2.68293	0	0	0
