# Supplementary material for: A Network Pharmacology and Molecular-Docking-Based Approach to Identify the Probable Targets of Short-Chain Fatty-Acid-Producing Microbial Metabolites against Kidney Cancer and Inflammation
Source: Biomolecules. 2023 Nov 20;13(11):1678. doi: 10.3390/biom13111678 (PMC10669250; doi:10.3390/biom13111678)
Supplement: Supplementary file 1 [file biomolecules-13-01678-s001.zip › supplementary/Supplementary S7. ADME properties of selected compounds.xlsx]

## Sheet: gene, metabolite, microbe
Final target Gene	Gene targeted Compounds
TP53	Bile acid (439520, CHEBI:22868)
CTNNB1	2-Hydroxy-3-(5-hydroxy-1H-indol-3-yl)propanoic acid (192215)
	3-Hydroxy-4-methoxybenzenepropanoic acid (2752054, HMDB0131138)
	Dihydrocaffeic acid (348154, HMDB0000423, CHEBI:48400)
	Indole-3-lactic acid (92904, CHEBI:24813)
MTOR	11-Methoxycurvularin (10381440)
	2,3-Bis(3,4-dihydroxybenzyl)butyrolactone (500189)
	6'-Hydroxy-O-desmethylangolensin (20601635, HMDB0041695, CHEBI:88662)
	8-Prenylnaringenin (480764, CHEBI:50207)
	Arctigenin (64981, CHEBI:391051)
	beta-D-Gal-(1->4)-beta-D-GlcNAc-(1->3)-beta-D-Gal-(1->4)-D-Glc (9831622, HMDB0006567, CHEBI:60239)
	Deoxycholic acid (222528, HMDB0000626, CHEBI:28834)
	Dihydrodaidzein (176907, HMDB0005760, CHEBI:75842)
	Equol (91469, HMDB0002209, CHEBI:428126)
	Glycocholic acid (10140, HMDB0000138, CHEBI:17687)
	Hesperetin dihydrochalcone (147608, HMDB0128062)
	Norathyriol (5281656, CHEBI:7622)
	Ponciretin (25201019)
	Secoisolariciresinol (65373, HMDB0013692, CHEBI:65004)
PIK3CA	11-Methoxycurvularin (10381440)
	2,3-Bis(3,4-dihydroxybenzyl)butyrolactone (500189)
	3-Hydroxyphenethyl alcohol (83404)
	6'-Hydroxy-O-desmethylangolensin (20601635, HMDB0041695, CHEBI:88662)
	Arctigenin (64981, CHEBI:391051)
	Caffeic acid (689043, HMDB0001964, CHEBI:16433)
	Deoxycholic acid (222528, HMDB0000626, CHEBI:28834)
	Dihydrodaidzein (176907, HMDB0005760, CHEBI:75842)
	Dihydroglycitein (101101166, CHEBI:174736)
	Equol (91469, HMDB0002209, CHEBI:428126)
	Glycocholic acid (10140, HMDB0000138, CHEBI:17687)
	Hesperetin dihydrochalcone (147608, HMDB0128062)
	Isoquercitrin (5280804, HMDB0037362, CHEBI:68352)
	Naringenin (439246, HMDB0002670, CHEBI:50202)
	Norathyriol (5281656, CHEBI:7622)
	Ponciretin (25201019)
	Quercitrin (5280459, HMDB0033751, CHEBI:17558)
	Secoisolariciresinol (65373, HMDB0013692, CHEBI:65004)
IL6	10-Keto-12Z-octadecenoic acid (24970825)
	Acetate (175, CHEBI:30089)
	Butyrate (104775, CHEBI:17968)
	Equol (91469, HMDB0002209, CHEBI:428126)
	Isoquercitrin (5280804, HMDB0037362, CHEBI:68352)
	Propionate (104745, CHEBI:17272)
	Quercimeritrin (5282160, CHEBI:28529)
ERBB2	(20S)-Protopanaxadiol (11213350, CHEBI:75950)
	2,3-Bis(3,4-dihydroxybenzyl)butyrolactone (500189)
	2,3-Dihydroxypropyl (E)-3-(3,4-dihydroxyphenyl)prop-2-enoate (5315606)
	2-Hydroxy-3-(5-hydroxy-1H-indol-3-yl)propanoic acid (192215)
	3-Hydroxy-4-methoxybenzenepropanoic acid (2752054, HMDB0131138)
	4-Hydroxy-(3',4'-dihydroxyphenyl)-valeric acid (52920332, HMDB0041679, CHEBI:137478)
	5-(3,4-Dihydroxyphenyl)-valerolactone (45093073)
	6'-Hydroxy-O-desmethylangolensin (20601635, HMDB0041695, CHEBI:88662)
	8-Prenylnaringenin (480764, CHEBI:50207)
	Caffeic acid (689043, HMDB0001964, CHEBI:16433)
	Ethyl phenyllactate, (-)- (9877619, HMDB0032618)
	Ginsenoside Rh2 (119307, CHEBI:77147)
	Hydroquinone (785, HMDB0002434, CHEBI:17594)
	Indole-3-lactic acid (92904, CHEBI:24813)
	Norathyriol (5281656, CHEBI:7622)
	Norathyriol (5281656, CHEBI:7622)
	Phloretin (4788, HMDB0003306, CHEBI:17276)
	Protopanaxadiol (9920281, CHEBI:76237)
PTGS2	(20S)-Protopanaxadiol (11213350, CHEBI:75950)
	(R)-3-(4-Hydroxyphenyl)lactate (9548632, CHEBI:10980)
	10-Keto-12Z-octadecenoic acid (24970825)
	2-(4-Hydroxyphenyl)propionic acid, (2S)- (6971268)
	2,3-Dihydroxypropyl (E)-3-(3,4-dihydroxyphenyl)prop-2-enoate (5315606)
	2-Hydroxy-3-(4-hydroxyphenyl)propanoic acid (9378, HMDB0000755, CHEBI:17385)
	2-Hydroxy-3-(5-hydroxy-1H-indol-3-yl)propanoic acid (192215)
	3-(3,4-Dihydroxyphenyl)-2-hydroxypropanoic acid (439435, HMDB0003503, CHEBI:17807)
	3-(3-Hydroxyphenyl)propanoic acid (91, HMDB0000375, CHEBI:1427)
	3-(4-Hydroxyphenyl)propionic acid (10394, HMDB0002199, CHEBI:32980)
	3,4-Dihydroxybenzoic acid (72, CHEBI:36062)
	3,4-Dihydroxyphenylacetic acid (547, HMDB0001336, CHEBI:41941)
	3-Hydroxy-4-methoxybenzenepropanoic acid (2752054, HMDB0131138)
	3-Hydroxybenzoic acid (7420, HMDB0002466, CHEBI:30764)
	3-Hydroxyphenethyl alcohol (83404)
	3-Phenylpropionic acid (107, CHEBI:28631)
	4-Hydroxy-(3',4'-dihydroxyphenyl)-valeric acid (52920332, HMDB0041679, CHEBI:137478)
	4-Hydroxybenzoic acid (135, HMDB0000500, CHEBI:30763)
	4-Hydroxyphenylacetic acid (127, HMDB0000020, CHEBI:18101)
	6,7,4'-Trihydroxyisoflavone (5284649, HMDB0031715, CHEBI:74957)
	6'-Hydroxy-O-desmethylangolensin (20601635, HMDB0041695, CHEBI:88662)
	Aglycone (CHEBI:166892)
	Apigenin (5280443, HMDB0002124, CHEBI:18388)
	Caffeic acid (689043, HMDB0001964, CHEBI:16433)
	Chrysin (5281607, HMDB0036619, CHEBI:75095)
	Daidzein (5281708, HMDB0003312, CHEBI:28197)
	Dihydrocaffeic acid (348154, HMDB0000423, CHEBI:48400)
	D-Lactic acid (61503, HMDB0001311, CHEBI:42111)
	Equol (91469, HMDB0002209, CHEBI:428126)
	Ethyl phenyllactate, (-)- (9877619, HMDB0032618)
	Folic acid (135398658, HMDB0000121, CHEBI:27470)
	Genistein (5280961, HMDB0003217, CHEBI:28088)
	Glycitein (5317750, HMDB0005781, CHEBI:542494)
	Isobutyric acid (6590, HMDB0001873, CHEBI:16135)
	Isoquercitrin (5280804, HMDB0037362, CHEBI:68352)
	Kaempferol (5280863, HMDB0005801, CHEBI:28499)
	Leucine (6106, HMDB0000687, CHEBI:15603)
	Naringenin chalcone (5280960, HMDB0029631, CHEBI:15413)
	Norathyriol (5281656, CHEBI:7622)
	Norathyriol (5281656, CHEBI:7622)
	Palmitic acid (985, HMDB0000220, CHEBI:15756)
	Phenolic acid (CHEBI:166890)
	Phenylacetic acid (999, HMDB0000209, CHEBI:30745)
	Phloretin (4788, HMDB0003306, CHEBI:17276)
	Pipecolic acid (849, HMDB0000070, CHEBI:17964)
	Ponciretin (25201019)
	Proline (145742, HMDB0000162, CHEBI:17203)
	Protopanaxadiol (9920281, CHEBI:76237)
	Quercimeritrin (5282160, CHEBI:28529)
	Quercitrin (5280459, HMDB0033751, CHEBI:17558)
	Quinic acid (6508, HMDB0003072, CHEBI:17521)
IGF1R	2,3-Bis(3,4-dihydroxybenzyl)butyrolactone (500189)
	2-Amino-1-methyl-6-phenylimidazo[4,5-b]pyridine (1530, CHEBI:76290)
	3-(3,4-Dihydroxyphenyl)-2-hydroxypropanoic acid (439435, HMDB0003503, CHEBI:17807)
	3-(3-Hydroxyphenyl)propanoic acid (91, HMDB0000375, CHEBI:1427)
	3-(4-Hydroxyphenyl)propionic acid (10394, HMDB0002199, CHEBI:32980)
	3,4-Dihydroxybenzoic acid (72, CHEBI:36062)
	3,4-Dihydroxyphenylacetic acid (547, HMDB0001336, CHEBI:41941)
	3-Hydroxy-4-methoxybenzenepropanoic acid (2752054, HMDB0131138)
	3-Hydroxybenzoic acid (7420, HMDB0002466, CHEBI:30764)
	4-Hydroxy-(3',4'-dihydroxyphenyl)-valeric acid (52920332, HMDB0041679, CHEBI:137478)
	4-Hydroxybenzoic acid (135, HMDB0000500, CHEBI:30763)
	6,7,4'-Trihydroxyisoflavone (5284649, HMDB0031715, CHEBI:74957)
	Apigenin (5280443, HMDB0002124, CHEBI:18388)
	Chrysin (5281607, HMDB0036619, CHEBI:75095)
	Dihydrocaffeic acid (348154, HMDB0000423, CHEBI:48400)
	Dihydrodaidzein (176907, HMDB0005760, CHEBI:75842)
	Equol (91469, HMDB0002209, CHEBI:428126)
	Ethyl phenyllactate, (-)- (9877619, HMDB0032618)
	Genistein (5280961, HMDB0003217, CHEBI:28088)
	Glutathione (124886, HMDB0000125, CHEBI:16856)
	Glycitein (5317750, HMDB0005781, CHEBI:542494)
	Hesperetin dihydrochalcone (147608, HMDB0128062)
	Isoquercitrin (5280804, HMDB0037362, CHEBI:68352)
	Kaempferol (5280863, HMDB0005801, CHEBI:28499)
	Naringenin (439246, HMDB0002670, CHEBI:50202)
	Naringenin chalcone (5280960, HMDB0029631, CHEBI:15413)
	Norathyriol (5281656, CHEBI:7622)
	Phenolic acid (CHEBI:166890)
	Quercetin (5280343, HMDB0005794, CHEBI:16243)
	Quercimeritrin (5282160, CHEBI:28529)
	Secoisolariciresinol (65373, HMDB0013692, CHEBI:65004)
RELA	2,3-Dihydroxypropyl (E)-3-(3,4-dihydroxyphenyl)prop-2-enoate (5315606)
	8-Prenylnaringenin (480764, CHEBI:50207)
	Caffeic acid (689043, HMDB0001964, CHEBI:16433)
	Equol (91469, HMDB0002209, CHEBI:428126)
	Naringenin chalcone (5280960, HMDB0029631, CHEBI:15413)
	Secoisolariciresinol (65373, HMDB0013692, CHEBI:65004)

## Sheet: metabolites_Physical and ADME
Metabolites	Smile ID	Physiochemical properties						Drug-likeness		ADME											Toxicity
		Molecular weight (<500g/mol)	Num. rotatable bonds	Num. H-bond acceptors (≤10)	Hydrogen bond donor (≤5)	Molar Refractivity 40-130	TPSA (Å2) (<140Å2)	Lipinski	Bioavailability Score	Human Intestinal Absorption (%)	GI absorption	Blood-brain Barrier Permeability (0-1)	Volume distribution (0.04-20L/Kg)	Plasma-protein binding (<90%)	Total Clearance (log ml/min/kg)	CYP1A2 inhibitor (0-1)	CYP2C19 inhibitor (0-1)	CYP2C9 inhibitor (0-1)	CYP2D6 inhibitor (0-1)	CYP3A4 inhibitor (0-1)	Hepatotoxicity (0-1)	Carcinogenesis (0-1)	Immunotoxicity (0-1)	Mutagenicity(0-1)	Cytotoxicity (0-1)	Mitochondrial Membrane Potential (0-1)	Oral Toxicity class
(20S)-Protopanaxadiol (11213350, CHEBI:75950)	CC(=CCC[C@](C)([C@H]1CC[C@@]2([C@@H]1[C@@H](C[C@H]3[C@]2(CC[C@@H]4[C@@]3(CC[C@@H](C4(C)C)O)C)C)O)C)O)C	460.7	4	3	3	139.88	60.69	Yes; 1 violation	0.55	92.835	High	-0.372	1.075	0.9394	0.394	No	No	No	No	No	Inactive (0.83)	Active (0.55)	Active (0.83)	Inactive (0.73)	Inactive (0.96)	Active (0.81)	5
(R)-3-(4-Hydroxyphenyl)lactate (9548632, CHEBI:10980)	C1=CC(=CC=C1C[C@H](C(=O)[O-])O)O	181.16	3	4	2	44.04	80.59	Yes; 0 violation	0.56	75.578	High	-0.056	0.325	0.43037	0.367	No	No	No	No	No	Inactive (0.63)	Inactive (0.69)	Inactive (0.98)	Inactive (0.91)	Inactive (0.84)	Inactive (0.95)	4
10-Keto-12Z-octadecenoic acid (24970825)	CCCCCC/C=C/C(=O)CCCCCCCCC(=O)O	296.4	15	3	1	90.14	54.37	Yes; 0 violation	0.85	93.608	High	-0.321	0.633	0.96993	1.908	Yes	No	Yes	No	No	Inactive (0.65)	Inactive (0.62)	Inactive (0.99)	Inactive (0.99)	Inactive (0.74)	Inactive (0.99)	2
11-Methoxycurvularin (10381440)	C[C@H]1CCCC(CC(=O)C2=C(CC(=O)O1)C=C(C=C2O)O)OC	322.4	1	6	2	84.36	93.06	Yes; 0 violation	0.55	87.07	High	-0.036	0.567	0.57992	0.934	No	No	No	No	No	Inactive (0.80)	Active (0.56)	Active (0.88)	Inactive (0.90)	Inactive (0.78)	Active (0.70)	4
2-(4-Hydroxyphenyl)propionic acid, (2S)- (6971268)	CC(C1=CC=C(C=C1)O)C(=O)O	166.17	2	3	2	44.82	57.53	Yes; 0 violation	0.85	98.815	High	0.259	0.33	0.78966	0.209	No	No	No	No	No	Inactive (0.51)	Inactive (0.60)	Inactive (0.99)	Inactive (0.98)	Inactive (0.86)	Inactive (0.98)	4
2,3-Bis(3,4-dihydroxybenzyl)butyrolactone (500189)	C1C(C(C(=O)O1)CC2=CC(=C(C=C2)O)O)CC3=CC(=C(C=C3)O)O	330.3	4	6	4	87.19	107.22	Yes; 0 violation	0.55	79.044	High	-1.037	0.597	0.93981	0.017	No	No	No	Yes	No	Inactive (0.77)	Inactive (0.52)	Active (0.74)	Inactive (0.77)	Inactive (0.88)	Active (0.74)	5
2,3-Dihydroxypropyl (E)-3-(3,4-dihydroxyphenyl)prop-2-enoate (5315606)	C1=CC(=C(C=C1/C=C/C(=O)OC[C@H](CO)O)O)O	254.24	6	6	4	63.42	107.22	Yes; 0 violation	0.55	64.116	High	-1.093	0.332	0.55937	0.386	No	No	No	No	No	Inactive (0.87)	Inactive (0.80)	Active (0.78)	Inactive (0.79)	Inactive (0.88)	Inactive (0.95)	5
2-Amino-1-methyl-6-phenylimidazo[4,5-b]pyridine (1530, CHEBI:76290)	Cn1c(N)nc2ncc(cc12)-c1ccccc1	224.26	1	2	1	68.63	56.73	Yes; 0 violation	0.55	95.722	High	0.419	1.747	0.75626	0.729	Yes	No	No	Yes	Yes	Active (0.55)	Active (0.94)	Inactive (0.94)	Active (0.74)	Inactive (0.86)	Inactive (0.91)	4
2-Hydroxy-3-(4-hydroxyphenyl)propanoic acid (9378, HMDB0000755, CHEBI:17385)	C1=CC(=CC=C1CC(C(=O)O)O)O	182.17	3	4	3	45.98	77.76	Yes; 0 violation	0.56	75.007	High	-0.745	0.243	0.42861	0.585	No	No	No	No	No	Inactive (0.70)	Inactive (0.65)	Inactive (0.99)	Inactive (0.90)	Inactive (0.84)	Inactive (0.97)	4
2-Hydroxy-3-(5-hydroxy-1H-indol-3-yl)propanoic acid (192215)	C1=CC2=C(C=C1O)C(=CN2)CC(C(=O)O)O	221.21	3	4	4	57.84	93.55	Yes; 0 violation	0.56	51.848	High	-0.76	0.367	0.48371	0.664	No	No	No	No	No	Inactive (0.59)	Inactive (0.69)	Inactive (0.78)	Inactive (0.88)	Inactive (0.80)	Inactive (0.69)	4
3-(3,4-Dihydroxyphenyl)-2-hydroxypropanoic acid (439435, HMDB0003503, CHEBI:17807)	C1=CC(=C(C=C1CC(C(=O)O)O)O)O	198.17	3	5	4	48	97.99	Yes; 0 violation	0.56	41.772	High	-0.876	0.429	0.47709	0.444	No	No	No	No	No	Inactive (0.64)	Inactive (0.62)	Inactive (0.95)	Inactive (0.82)	Inactive (0.89)	Inactive (0.95)	4
3-(3-Hydroxyphenyl)propanoic acid (91, HMDB0000375, CHEBI:1427)	C1=CC(=CC(=C1)O)CCC(=O)O	166.17	3	3	2	44.82	57.53	Yes; 0 violation	0.85	93.053	High	-0.276	0.24	0.59883	0.299	No	No	No	No	No	Inactive (0.65)	Inactive (0.75)	Inactive (0.99)	Inactive (0.92)	Inactive (0.82)	Inactive (0.87)	4
3-(4-Hydroxyphenyl)propionic acid (10394, HMDB0002199, CHEBI:32980)	C1=CC(=CC=C1CCC(=O)O)O	166.17	3	3	2	44.82	57.53	Yes; 0 violation	0.85	93.682	High	-0.213	0.213	0.68097	0.299	No	No	No	No	No	Inactive (0.65)	Inactive (0.75)	Inactive (0.99)	Inactive (0.94)	Inactive (0.84)	Inactive (0.88)	4
3,4-Dihydroxybenzoic acid (72, CHEBI:36062)	C1=CC(=C(C=C1C(=O)O)O)O	154.12	1	4	3	37.45	77.76	Yes; 0 violation	0.56	71.174	High	-0.683	0.395	0.41692	0.551	No	No	No	No	Yes	Inactive (0.59)	Active (0.72)	Inactive (0.99)	Inactive (0.97)	Inactive (0.90)	Inactive (0.99)	4
3,4-Dihydroxyphenylacetic acid (547, HMDB0001336, CHEBI:41941)	OC(=O)CC1=CC(O)=C(O)C=C1	168.15	2	4	3	42.03	77.76	Yes; 0 violation	0.56	61.689	High	-0.825	0.337	0.5846	0.254	No	No	No	No	No	Inactive (0.62)	Inactive (0.59)	Inactive (0.99)	Inactive (0.83)	Inactive (0.88)	Inactive (0.95)	4
3-Hydroxy-4-methoxybenzenepropanoic acid (2752054, HMDB0131138)	COC1=C(C=C(C=C1)CCC(=O)O)O	196.2	4	4	2	51.31	66.76	Yes; 0 violation	0.85	93.826	High	-0.195	0.252	0.77717	0.321	No	No	No	No	No	Inactive (0.66)	Inactive (0.77)	Inactive (0.95)	Inactive (0.85)	Inactive (0.84)	Inactive (0.88)	4
3-Hydroxybenzoic acid (7420, HMDB0002466, CHEBI:30764)	C1=CC(=CC(=C1)O)C(=O)O	138.12	1	3	2	35.42	57.53	Yes; 0 violation	0.85	79.081	High	-0.397	0.314	0.32927	0.588	No	No	No	No	No	Inactive (0.52)	Inactive (0.51)	Inactive (0.99)	Inactive (0.99)	Inactive (0.86)	Inactive (0.99)	4
3-Hydroxyphenethyl alcohol (83404)	C1=CC(=CC(=C1)O)CCO	138.16	2	2	2	39.4	40.46	Yes; 0 violation	0.55	80.756	High	-0.25	2.881	0.2654	0.288	No	No	No	No	No	Inactive (0.89)	Inactive (0.76)	Inactive (0.97)	Inactive (0.88)	Inactive (0.90)	Inactive (0.88)	4
3-Phenylpropionic acid (107, CHEBI:28631)	C1=CC=C(C=C1)CCC(=O)O	150.17	3	2	1	42.79	42.79	Yes; 0 violation	0.85	95.022	High	0.417	0.174	0.84543	0.336	No	No	No	No	No	Active (0.69)	Inactive (0.62)	Active (0.96)	Inactive (0.97)	Inactive (0.93)	Inactive (0.70)	4
4-Hydroxy-(3',4'-dihydroxyphenyl)-valeric acid (52920332, HMDB0041679, CHEBI:137478)	C1=CC(=C(C=C1CC(CCC(=O)O)O)O)O	226.23	5	5	4	57.62	97.99	Yes; 0 violation	0.56	50.012	High	-0.822	0.304	0.51713	0.271	No	No	No	No	No	Inactive (0.71)	Inactive (0.62)	Inactive (0.96)	Inactive (0.79)	Inactive (0.86)	Inactive (0.84)	4
4-Hydroxybenzoic acid (135, HMDB0000500, CHEBI:30763)	C1=CC(=CC=C1C(=O)O)O	138.12	1	3	2	35.42	57.53	Yes; 0 violation	0.85	83.961	High	-0.334	0.291	0.38354	0.593	No	No	No	No	No	Inactive (0.52)	Inactive (0.51)	Inactive (0.99)	Inactive (0.99)	Inactive (0.86)	Inactive (0.99)	5
4-Hydroxyphenylacetic acid (127, HMDB0000020, CHEBI:18101)	C1=CC(=CC=C1CC(=O)O)O	152.15	2	3	2	40.01	57.53	Yes; 0 violation	0.85	82.116	High	-0.27	0.237	0.57828	0.224	No	No	No	No	No	Inactive (0.55)	Inactive (0.74)	Inactive (0.99)	Inactive (0.94)	Inactive (0.83)	Inactive (0.94)	4
5-(3,4-Dihydroxyphenyl)-valerolactone (45093073)	C1CC(OC(=O)C1)C2=CC(=C(C=C2)O)O	208.21	1	4	2	53.85	66.76	Yes; 0 violation	0.55	92.035	High	0.113	0.526	0.61673	0.195	No	No	No	No	No	Inactive (0.71)	Active (0.58)	Active (0.50)	Inactive (0.85)	Inactive (0.77)	Inactive (0.70)	4
6,7,4'-Trihydroxyisoflavone (5284649, HMDB0031715, CHEBI:74957)	C1=CC(=CC=C1C2=COC3=CC(=C(C=C3C2=O)O)O)O	270.24	1	5	3	73.99	90.9	Yes; 0 violation	0.55	93.528	High	-0.852	0.458	0.96519	0.05	Yes	No	No	Yes	Yes	Inactive (0.7)	Active (0.71)	Inactive (0.96)	Active (0.53)	Inactive (0.98)	Active (0.82)	5
6'-Hydroxy-O-desmethylangolensin (20601635, HMDB0041695, CHEBI:88662)	CC(C1=CC=C(C=C1)O)C(=O)C2=C(C=C(C=C2O)O)O	274.27	3	5	4	74.02	97.99	Yes; 0 violation	0.55	74.335	High	-0.99	0.482	0.98298	0.18	Yes	No	No	No	Yes	Inactive (0.60)	Inactive (0.78)	Inactive (0.99)	Inactive (0.65)	Inactive (0.78)	Active (0.97)	4
8-Prenylnaringenin (480764, CHEBI:50207)	CC(=CCC1=C2C(=C(C=C1O)O)C(=O)C[C@H](O2)C3=CC=C(C=C3)O)C	340.4	3	5	3	95.29	86.99	Yes; 0 violation	0.55	91	High	-0.925	0.681	0.98025	0.119	Yes	No	Yes	Yes	Yes	Inactive (0.69)	Inactive (0.69)	Active (0.66)	Inactive (0.64)	Inactive (0.79)	Active (0.69)	4
Acetate (175, CHEBI:30089)	CC(=O)[O-]	59.04	0	2	0	11.56	40.13	Yes; 0 violation	0.85	100	Low	-0.329	0.431	0.11299	0.685	No	No	No	No	No	Inactive (0.85)	Inactive (0.52)	Inactive (0.99)	Inactive (0.92)	Inactive (0.76)	Inactive (0.94)	1
Aglycone (CHEBI:166892)	CC[C@@H](C)[C@H]1[C@@H](C=C[C@]2(O1)C[C@@H]3C[C@H](O2)CC=C([C@H]([C@H](C=CC=C4CO[C@H]5[C@]4([C@@H](C=C([C@H]5O)C)C(=O)O3)O)C)O)C)C	584.7	2	8	3	160.71	114.68	Yes; 1 violation	0.55	86.764	High	-0.771	1.663	0.8942	0.616	No	No	No	No	No	Inactive (0.86)	Inactive (0.62)	Active (0.99)	Inactive (0.64)	Inactive (0.63)	Active (0.72)	4
Apigenin (5280443, HMDB0002124, CHEBI:18388)	C1=CC(=CC=C1C2=CC(=O)C3=C(C=C(C=C3O2)O)O)O	270.24	1	5	3	73.99	90.9	Yes; 0 violation	0.55	93.25	High	-0.734	0.51	0.97255	0.566	Yes	No	No	Yes	Yes	Inactive (0.68)	Inactive (0.62)	Inactive (0.99)	Inactive (0.57)	Inactive (0.87)	Active (1.0)	5
Arctigenin (64981, CHEBI:391051)	COC1=C(C=C(C=C1)C[C@H]2COC(=O)[C@@H]2CC3=CC(=C(C=C3)O)OC)OC	372.4	7	6	1	100.6	74.22	Yes; 0 violation	0.55	94.416	High	-0.582	0.455	0.96352	0.214	No	No	Yes	Yes	Yes	Inactive (0.74)	Inactive (0.60)	Active (0.98)	Inactive (0.72)	Inactive (0.94)	Active (0.55)	4
beta-D-Gal-(1->4)-beta-D-GlcNAc-(1->3)-beta-D-Gal-(1->4)-D-Glc (9831622, HMDB0006567, CHEBI:60239)	CC(=O)N[C@@H]1[C@H]([C@@H]([C@H](O[C@H]1O[C@H]2[C@H]([C@H](O[C@H]([C@@H]2O)O[C@@H]3[C@H](OC([C@@H]([C@H]3O)O)O)CO)CO)O)CO)O[C@H]4[C@@H]([C@H]([C@H]([C@H](O4)CO)O)O)O)O	707.6	12	21	14	144.34	356.7	Yes; 3 violation	0.17	0	Low	-1.951	0.143	0.11328	1.811	No	No	No	No	No	Inactive (0.64)	Inactive (0.76)	Inactive (0.98)	Inactive (0.76)	Inactive (0.72)	Inactive (0.98)	5
Bile acid (439520, CHEBI:22868)	CC(CCC(=O)O)C1CCC2C1([C@H](CC3C2[C@@H](C[C@H]4C3(CC[C@H](C4)O)C)O)O)C	408.6	4	5	4	113.76	97.99	Yes; 0 violation	0.56	61.546	High	-0.716	0.447	0.81529	0.653	No	No	No	No	No	Active (0.73)	Inactive (0.79)	Inactive (0.65)	Inactive (0.56)	Inactive (0.76)	Active (0.76)	4
Butyrate (104775, CHEBI:17968)	CCCC(=O)[O-]	87.1	2	2	0	21.17	40.13	Yes; 0 violation	0.85	99.24	High	-0.266	0.28	0.34462	0.453	No	No	No	No	No	Inactive (0.65)	Inactive (0.63)	Inactive (0.99)	Inactive (0.91)	Inactive (0.74)	Inactive (0.99)	3
Caffeic acid (689043, HMDB0001964, CHEBI:16433)	C1=CC(=C(C=C1/C=C/C(=O)O)O)O	180.16	2	4	3	47.16	77.76	Yes; 0 violation	0.56	69.407	High	-0.647	0.374	0.66731	0.508	No	No	No	No	No	Inactive (0.57)	Active (0.78)	Inactive (0.50)	Inactive (0.98)	Inactive (0.86)	Inactive (0.98)	5
Chrysin (5281607, HMDB0036619, CHEBI:75095)	C1=CC=C(C=C1)C2=CC(=O)C3=C(C=C(C=C3O2)O)O	254.24	1	4	2	71.97	70.67	Yes; 0 violation	0.55	93.761	High	0.047	0.493	0.98028	0.405	Yes	No	No	Yes	Yes	Inactive (0.68)	Inactive (0.62)	Inactive (0.99)	Inactive (0.57)	Inactive (0.87)	Active (1.0)	5
Daidzein (5281708, HMDB0003312, CHEBI:28197)	C1=CC(=CC=C1C2=COC3=C(C2=O)C=CC(=C3)O)O	254.24	1	4	2	71.97	70.67	Yes; 0 violation	0.55	94.839	High	-0.064	0.495	0.97079	0.164	Yes	No	No	Yes	Yes	Inactive (0.71)	Inactive (0.58)	Inactive (0.92)	Inactive (0.85)	Inactive (0.89)	Active (0.91)	5
Deoxycholic acid (222528, HMDB0000626, CHEBI:28834)	C[C@H](CCC(=O)O)[C@H]1CC[C@@H]2[C@@]1([C@H](C[C@H]3[C@H]2CC[C@H]4[C@@]3(CC[C@H](C4)O)C)O)C	392.6	4	4	3	112.6	77.76	Yes; 0 violation	0.56	95.405	High	-0.614	0.553	0.94692	0.63	No	No	No	No	No	Active (0.73)	Inactive (0.79)	Active (0.72)	Inactive (0.56)	Inactive (0.76)	Active (0.76)	4
Dihydrocaffeic acid (348154, HMDB0000423, CHEBI:48400)	C1=CC(=C(C=C1CCC(=O)O)O)O	182.17	3	4	3	46.84	77.76	Yes; 0 violation	0.56	69.357	High	-0.666	0.309	0.62336	0.245	No	No	No	No	No	Inactive (0.67)	Inactive (0.64)	Inactive (0.99)	Inactive (0.79)	Inactive (0.86)	Active (0.88)	4
Dihydrodaidzein (176907, HMDB0005760, CHEBI:75842)	C1C(C(=O)C2=C(O1)C=C(C=C2)O)C3=CC=C(C=C3)O	256.25	1	4	2	69.55	66.76	Yes; 0 violation	0.55	95.56	High	0.227	0.508	94.499	0.088	Yes	No	No	No	No	Inactive (0.76)	Inactive (0.56)	Inactive (0.51)	Inactive (0.74)	Inactive (0.89)	Active (0.61)	5
Dihydroglycitein (101101166, CHEBI:174736)	COC1=C(C=C2C(=C1)C(=O)C(CO2)C3=CC=C(C=C3)O)O	286.28	2	5	2	76.04	75.99	Yes; 0 violation	0.55	94.255	High	0.038	0.467	0.97586	0.022	Yes	No	No	No	Yes	Inactive (0.79)	Inactive (0.61)	Active (0.92)	Inactive (0.66)	Inactive (0.90)	Active (0.60)	2
D-Lactic acid (61503, HMDB0001311, CHEBI:42111)	C[C@H](C(=O)O)O	90.08	1	3	2	19.47	57.53	Yes; 0 violation	0.85	83.333	High	-0.355	0.337	9.453	0.749	No	No	No	No	No	Inactive (0.94)	Inactive (0.68)	Inactive (0.99)	Inactive (0.95)	Inactive (0.67)	Inactive (1.0)	3
Equol (91469, HMDB0002209, CHEBI:428126)	C1[C@H](COC2=C1C=CC(=C2)O)C3=CC=C(C=C3)O	242.27	1	3	2	69.13	49.69	Yes; 0 violation	0.55	94.189	High	0.324	1.006	95.491	0.154	Yes	No	No	Yes	No	Inactive (0.79)	Inactive (0.53)	Inactive (0.98)	Inactive (0.57)	Inactive (0.77)	Active (0.54)	4
Ethyl phenyllactate, (-)- (9877619, HMDB0032618)	CCOC(=O)C(CC1=CC=CC=C1)O	194.23	5	3	1	53.08	46.53	Yes; 0 violation	0.55	83.195	High	-0.128	1.196	0.56879	0.779	No	No	No	No	No	Inactive (0.76)	Inactive (0.75)	Inactive (0.99)	Inactive (0.80)	Inactive (0.83)	Inactive (0.96)	5
Folic acid (135398658, HMDB0000121, CHEBI:27470)	C1=CC(=CC=C1C(=O)N[C@@H](CCC(=O)O)C(=O)O)NCC2=CN=C3C(=N2)C(=O)NC(=N3)N	441.4	10	9	6	111.92	213.28	Yes; 2 violation	0.11	1.108	High	-1.615	0.302	0.85725	0.527	No	No	No	No	No	Inactive (0.97)	Inactive (0.56)	Inactive (0.98)	Inactive (0.82)	Inactive (0.74)	Inactive (0.98)	3
Genistein (5280961, HMDB0003217, CHEBI:28088)	C1=CC(=CC=C1C2=COC3=CC(=CC(=C3C2=O)O)O)O	270.24	1	5	3	73.99	90.9	Yes; 0 violation	0.55	93.387	High	-0.71	0.471	0.97558	0.151	Yes	No	No	Yes	Yes	Inactive (0.69)	Inactive (0.69)	Inactive (0.97)	Inactive (0.74)	Inactive (0.91)	Active (0.99)	5
Ginsenoside Rh2 (119307, CHEBI:77147)	CC(=CCC[C@@](C)([C@H]1CC[C@@]2([C@@H]1[C@@H](C[C@H]3[C@]2(CC[C@@H]4[C@@]3(CC[C@@H](C4(C)C)O[C@H]5[C@@H]([C@H]([C@@H]([C@H](O5)CO)O)O)O)C)C)O)C)O)C	622.9	7	8	6	172.26	139.84	Yes; 2 violation	0.17	57.315	Low	-1.08	0.792	0.88486	0.44	No	No	No	No	No	Inactive (0.95)	Inactive (0.74)	Active (0.99)	Inactive (0.79)	Inactive (0.87)	Inactive (0.51)	5
Glutathione (124886, HMDB0000125, CHEBI:16856)	C(CC(=O)N[C@@H](CS)C(=O)NCC(=O)O)[C@@H](C(=O)O)N	307.33	11	7	5	70.37	197.62	Yes; 0 violation	0.11	0	Low	-1.085	0.357	0.16722	0.308	No	No	No	No	No	Inactive (0.94)	Inactive (0.68)	Active (0.99)	Inactive (0.81)	Inactive (0.72)	Inactive (0.99)	5
Glycitein (5317750, HMDB0005781, CHEBI:542494)	COC1=C(C=C2C(=C1)C(=O)C(=CO2)C3=CC=C(C=C3)O)O	284.26	2	5	2	78.46	79.9	Yes; 0 violation	0.55	94.681	High	-0.322	0.427	0.98813	0.204	Yes	No	No	Yes	Yes	Inactive (0.72)	Inactive (0.59)	Inactive (0.52)	Inactive (0.71)	Inactive (0.89)	Active (0.89)	5
Glycocholic acid (10140, HMDB0000138, CHEBI:17687)	C[C@H](CCC(=O)NCC(=O)O)[C@H]1CC[C@@H]2[C@@]1([C@H](C[C@H]3[C@H]2[C@@H](C[C@H]4[C@@]3(CC[C@H](C4)O)C)O)O)C	465.6	7	6	5	126.38	127.09	Yes; 0 violation	0.56	44.633	High	-0.813	0.335	0.35521	0.659	No	No	No	No	Yes	Inactive (0.79)	Inactive (0.63)	Inactive (0.65)	Inactive (0.87)	Inactive (0.77)	Inactive (0.93)	5
Hesperetin dihydrochalcone (147608, HMDB0128062)	COC1=C(C=C(C=C1)CCC(=O)C2=C(C=C(C=C2O)O)O)O	304.29	5	6	4	80.51	107.22	Yes; 0 violation	0.55	59.548	High	-1.14	0.511	0.9537	0.221	Yes	No	Yes	No	Yes	Inactive (0.65)	Inactive (0.78)	Inactive (0.66)	Inactive (0.73)	Inactive (0.89)	Active (0.82)	5
Hydroquinone (785, HMDB0002434, CHEBI:17594)	C1=CC(=CC=C1O)O	110.11	0	2	2	30.49	40.46	Yes; 0 violation	0.55	86.856	High	-0.318	1.367	0.47097	0.52	No	No	No	No	Yes	Active (0.69)	Inactive (0.62)	Active (0.96)	Inactive (0.97)	Inactive (0.93)	Inactive (0.70)	4
Indole-3-lactic acid (92904, CHEBI:24813)	C1=CC=C2C(=C1)C(=CN2)CC(C(=O)O)O	205.21	3	3	3	55.81	73.32	Yes; 0 violation	0.85	79.56	High	-0.602	0.235	0.58691	0.805	No	No	No	No	No	Inactive (0.51)	Active (0.80)	Inactive (0.95)	Inactive (0.89)	Inactive (0.81)	Active (0.57)	4
Isobutyric acid (6590, HMDB0001873, CHEBI:16135)	CC(C)C(=O)O	88.11	1	2	1	23.11	37.3	Yes; 0 violation	0.85	90.56	High	-0.267	0.394	0.40754	0.322	No	No	No	No	No	Inactive (0.74)	Inactive (0.81)	Inactive (0.99)	Inactive (0.98)	Inactive (0.78)	Inactive (1.0)	3
Isoquercitrin (5280804, HMDB0037362, CHEBI:68352)	C1=CC(=C(C=C1C2=C(C(=O)C3=C(C=C(C=C3O2)O)O)O[C@H]4[C@@H]([C@H]([C@@H]([C@H](O4)CO)O)O)O)O)O	464.4	4	12	8	110.16	210.51	Yes; 0 violation	0.17	47.999	Low	-1.688	0.834	0.89488	0.394	No	No	No	No	No	Inactive (0.82)	Inactive (0.85)	Active (0.66)	Inactive (0.76)	Inactive (0.69)	Inactive (0.98)	5
Kaempferol (5280863, HMDB0005801, CHEBI:28499)	C1=CC(=CC=C1C2=C(C(=O)C3=C(C=C(C=C3O2)O)O)O)O	286.24	1	6	4	76.01	111.13	Yes; 0 violation	0.55	74.29	High	-0.0939	0.522	0.97861	0.477	Yes	No	No	Yes	Yes	Inactive (0.68)	Inactive (0.72)	Inactive (0.96)	Inactive (0.52)	Inactive (0.98)	Active (1.0)	5
Leucine (6106, HMDB0000687, CHEBI:15603)	CC(C)C[C@@H](C(=O)O)N	131.17	3	3	2	35.44	63.32	Yes; 0 violation	0.55	74.448	High	-0.31	0.557	0.08465	0.203	No	No	No	No	No	Inactive (0.85)	Inactive (0.74)	Inactive (0.99)	Inactive (0.91)	Inactive (0.63)	Inactive (1.0)	6
Naringenin (439246, HMDB0002670, CHEBI:50202)	C1[C@H](OC2=CC(=CC(=C2C1=O)O)O)C3=CC=C(C=C3)O	272.25	1	5	3	71.57	86.99	Yes; 0 violation	0.55	91.31	High	-0.578	0.602	0.91189	0.06	Yes	No	No	No	Yes	Inactive (0.67)	Inactive (0.62)	Inactive (0.88)	Inactive (0.83)	Inactive (0.59)	Active (0.74)	4
Naringenin chalcone (5280960, HMDB0029631, CHEBI:15413)	C1=CC(=CC=C1/C=C/C(=O)C2=C(C=C(C=C2O)O)O)O	272.25	3	5	4	74.34	97.99	Yes; 0 violation	0.55	61.079	High	-0.908	0.469	0.98927	0.113	Yes	No	Yes	No	Yes	Inactive (0.60)	Inactive (0.67)	Active (0.82)	Inactive (0.80)	Inactive (0.74)	Active (0.99)	5
Norathyriol (5281656, CHEBI:7622)	C1=C(C=C2C(=C1O)C(=O)C3=CC(=C(C=C3O2)O)O)O	260.2	0	6	4	68.08	111.13	Yes; 0 violation	0.55	78.127	High	-1.091	0.658	0.91397	0.509	Yes	No	No	Yes	Yes	Inactive (0.73)	Inactive (0.66)	Inactive (0.95)	Inactive (0.58)	Inactive (0.96)	Active (0.88)	4
O-Desmethylangolensin (89472, HMDB0004629, CHEBI:88902)	CC(C1=CC=C(C=C1)O)C(=O)C2=C(C=C(C=C2)O)O	258.269	3	4	3	72	77.76	Yes; 0 violation	0.55	92.705	High	-0.793	0.513	0.97741	0.156	Yes	No	No	No	Yes	Inactive (0.60)	Inactive (0.78)	Inactive (0.98)	Inactive (0.65)	Inactive (0.78)	Active (0.97)	4
Palmitic acid (985, HMDB0000220, CHEBI:15756)	CCCCCCCCCCCCCCCC(=O)O	256.42	14	2	1	80.8	37.3	Yes; 1 violation	0.85	92.004	High	-0.111	0.608	0.98955	1.763	Yes	No	Yes	No	No	Inactive (0.52)	Inactive (0.63)	Inactive (0.99)	Inactive (1.0)	Inactive (0.74)	Inactive (1.0)	4
Phenolic acid (338, CHEBI:166890)	C1=CC=C(C(=C1)C(=O)O)O	138.12	1	3	2	35.42	57.53	Yes; 0 violation	0.85	83.887	High	-0.334	0.251	0.67272	0.607	No	No	No	No	No	Active (0.51)	Inactive (0.67)	Inactive (0.99)	Inactive (0.98)	Inactive (0.86)	Inactive (0.99)	4
Phenylacetic acid (999, HMDB0000209, CHEBI:30745)	C1=CC=C(C=C1)CC(=O)O	136.15	2	2	1	37.99	37.3	Yes; 0 violation	0.85	85.312	High	-0.157	0.177	0.68385	0.263	No	No	No	No	No	Active (0.60)	Inactive (0.84)	Inactive (0.99)	Inactive (0.93)	Inactive (0.85)	Inactive (0.99)	5
Phloretin (4788, HMDB0003306, CHEBI:17276)	C1=CC(=CC=C1CCC(=O)C2=C(C=C(C=C2O)O)O)O	274.27	4	5	4	74.02	97.99	Yes; 0 violation	0.55	60.5	High	0.927	0.563	0.93963	0.213	Yes	No	Yes	No	Yes	Inactive (0.63)	Inactive (0.72)	Inactive (0.98)	Inactive (0.88)	Inactive (0.82)	Active (0.98)	4
Pipecolic acid (849, HMDB0000070, CHEBI:17964)	C1CCNC(C1)C(=O)O	129.16	1	3	2	37.33	49.33	Yes; 0 violation	0.55	87.319	High	-0.285	0.687	0.09423	0.589	No	No	No	No	No	Inactive (0.73)	Inactive (0.63)	Inactive (0.99)	Inactive (0.79)	Inactive (0.73)	Inactive (0.92)	5
Ponciretin (25201019)	COC1=CC=C(C=C1)C2CC(=O)C3=C(C=C(C=C3O2)O)[O-]	285.27	2	5	1	74.15	78.82	Yes; 0 violation	0.56	95.063	High	-0.12	0.635	0.95615	0.158	Yes	Yes	No	No	Yes	Inactive (0.67)	Active (0.53)	Active (0.54)	Inactive (0.58)	Inactive (0.77)	Active (0.72)	4
Proline (145742, HMDB0000162, CHEBI:17203)	C1C[C@H](NC1)C(=O)O	115.13	1	3	2	32.52	49.33	Yes; 0 violation	0.55	87.223	High	-0.31	0.68	0.10191	0.632	No	No	No	No	No	Inactive (0.81)	Inactive (0.66)	Inactive (0.99)	Inactive (0.74)	Inactive (0.70)	Inactive (0.98)	4
Propionate (104745, CHEBI:17272)	CCC(=O)[O-]	73.07	1	2	0	16.39	40.13	Yes; 0 violation	0.85	100	High	-0.301	0.273	0.3264	0.433	No	No	No	No	No	Inactive (0.77)	Inactive (0.55)	Inactive (0.99)	Inactive (0.92)	Inactive (0.74)	Inactive (0.99)	3
Protopanaxadiol (9920281, CHEBI:76237)	CC(=CCC[C@](C)([C@H]1CC[C@@]2([C@@H]1[C@@H](C[C@H]3[C@]2(CC[C@@H]4[C@@]3(CC[C@@H](C4(C)C)O)C)C)O)C)O)C	460.7	4	3	3	139.88	60.69	Yes; 1 violation	0.55	92.835	High	-0.372	1.075	0.9394	0.394	No	No	No	No	No	Inactive (0.83)	Active (0.55)	Active (0.83)	Inactive (0.73)	Inactive (0.96)	Active (0.81)	5
Quercetin (5280343, HMDB0005794, CHEBI:16243)	C1=CC(=C(C=C1C2=C(C(=O)C3=C(C=C(C=C3O2)O)O)O)O)O	302.23	1	7	5	78.03	131.36	Yes; 0 violation	0.55	77.207	High	-1.098	0.579	0.95496	0.407	Yes	No	No	Yes	Yes	Inactive (0.69)	Active (0.68)	Inactive (0.87)	Active (0.51)	Inactive (0.99)	Active (1.0)	3
Quercimeritrin (5282160, CHEBI:28529)	C1=CC(=C(C=C1C2=C(C(=O)C3=C(C=C(C=C3O2)O[C@H]4[C@@H]([C@H]([C@@H]([C@H](O4)CO)O)O)O)O)O)O)O	464.4	4	12	8	110.16	210.51	Yes; 2 violation	0.17	33.633	Low	-1.623	0.775	0.91972	0.388	No	No	No	No	No	Inactive (0.82)	Inactive (0.85)	Active (0.58)	Inactive (0.76)	Inactive (0.69)	Inactive (0.98)	5
Quercitrin (5280459, HMDB0033751, CHEBI:17558)	C[C@H]1[C@@H]([C@H]([C@H]([C@@H](O1)OC2=C(OC3=CC(=CC(=C3C2=O)O)O)C4=CC(=C(C=C4)O)O)O)O)O	448.4	3	11	7	109	190.28	Yes; 2 violation	0.17	52.709	Low	-1.495	0.849	0.91967	0.364	No	No	No	No	No	Inactive (0.73)	Active (0.50)	Active (0.97)	Inactive (0.71)	Inactive (0.93)	Inactive (0.56)	5
Quinic acid (6508, HMDB0003072, CHEBI:17521)	C1[C@H](C([C@@H](CC1(C(=O)O)O)O)O)O	192.17	1	6	5	40.11	118.22	Yes; 0 violation	0.56	32.274	Low	-0.894	0.459	0.11482	0.639	No	No	No	No	No	Inactive (0.80)	Inactive (0.73)	Inactive (0.99)	Inactive (0.94)	Inactive (0.78)	Inactive (0.93)	6
Secoisolariciresinol (65373, HMDB0013692, CHEBI:65004)	COC1=C(C=CC(=C1)C[C@@H](CO)[C@@H](CC2=CC(=C(C=C2)O)OC)CO)O	362.4	9	6	4	99.28	99.38	Yes; 0 violation	0.55	66.875	High	-1.127	0.497	0.97095	0.248	No	No	No	Yes	No	Inactive (0.87)	Inactive (0.70)	Inactive (0.71)	Inactive (0.80)	Inactive (0.94)	Inactive (0.58)	4

## Sheet: shorting target, compounds
Final target Gene	Gene targeted Compounds
TP53	Bile acid (439520, CHEBI:22868)
CTNNB1	2-Hydroxy-3-(5-hydroxy-1H-indol-3-yl)propanoic acid (192215)
	3-Hydroxy-4-methoxybenzenepropanoic acid (2752054, HMDB0131138)
	Dihydrocaffeic acid (348154, HMDB0000423, CHEBI:48400)
	Indole-3-lactic acid (92904, CHEBI:24813)
MTOR	11-Methoxycurvularin (10381440)
	2,3-Bis(3,4-dihydroxybenzyl)butyrolactone (500189)
	6'-Hydroxy-O-desmethylangolensin (20601635, HMDB0041695, CHEBI:88662)
	8-Prenylnaringenin (480764, CHEBI:50207)
	Arctigenin (64981, CHEBI:391051)
	beta-D-Gal-(1->4)-beta-D-GlcNAc-(1->3)-beta-D-Gal-(1->4)-D-Glc (9831622, HMDB0006567, CHEBI:60239)
	Deoxycholic acid (222528, HMDB0000626, CHEBI:28834)
	Dihydrodaidzein (176907, HMDB0005760, CHEBI:75842)
	Equol (91469, HMDB0002209, CHEBI:428126)
	Glycocholic acid (10140, HMDB0000138, CHEBI:17687)
	Hesperetin dihydrochalcone (147608, HMDB0128062)
	Norathyriol (5281656, CHEBI:7622)
	Ponciretin (25201019)
	Secoisolariciresinol (65373, HMDB0013692, CHEBI:65004)
PIK3CA	11-Methoxycurvularin (10381440)
	2,3-Bis(3,4-dihydroxybenzyl)butyrolactone (500189)
	3-Hydroxyphenethyl alcohol (83404)
	6'-Hydroxy-O-desmethylangolensin (20601635, HMDB0041695, CHEBI:88662)
	Arctigenin (64981, CHEBI:391051)
	Caffeic acid (689043, HMDB0001964, CHEBI:16433)
	Deoxycholic acid (222528, HMDB0000626, CHEBI:28834)
	Dihydrodaidzein (176907, HMDB0005760, CHEBI:75842)
	Dihydroglycitein (101101166, CHEBI:174736)
	Equol (91469, HMDB0002209, CHEBI:428126)
	Glycocholic acid (10140, HMDB0000138, CHEBI:17687)
	Hesperetin dihydrochalcone (147608, HMDB0128062)
	Isoquercitrin (5280804, HMDB0037362, CHEBI:68352)
	Naringenin (439246, HMDB0002670, CHEBI:50202)
	Norathyriol (5281656, CHEBI:7622)
	Ponciretin (25201019)
	Quercitrin (5280459, HMDB0033751, CHEBI:17558)
	Secoisolariciresinol (65373, HMDB0013692, CHEBI:65004)
IL6	10-Keto-12Z-octadecenoic acid (24970825)
	Acetate (175, CHEBI:30089)
	Butyrate (104775, CHEBI:17968)
	Equol (91469, HMDB0002209, CHEBI:428126)
	Isoquercitrin (5280804, HMDB0037362, CHEBI:68352)
	Propionate (104745, CHEBI:17272)
	Quercimeritrin (5282160, CHEBI:28529)
ERBB2	2,3-Bis(3,4-dihydroxybenzyl)butyrolactone (500189)
	2,3-Dihydroxypropyl (E)-3-(3,4-dihydroxyphenyl)prop-2-enoate (5315606)
	2-Hydroxy-3-(5-hydroxy-1H-indol-3-yl)propanoic acid (192215)
	3-Hydroxy-4-methoxybenzenepropanoic acid (2752054, HMDB0131138)
	4-Hydroxy-(3',4'-dihydroxyphenyl)-valeric acid (52920332, HMDB0041679, CHEBI:137478)
	5-(3,4-Dihydroxyphenyl)-valerolactone (45093073)
	6'-Hydroxy-O-desmethylangolensin (20601635, HMDB0041695, CHEBI:88662)
	8-Prenylnaringenin (480764, CHEBI:50207)
	Caffeic acid (689043, HMDB0001964, CHEBI:16433)
	Ethyl phenyllactate, (-)- (9877619, HMDB0032618)
	Ginsenoside Rh2 (119307, CHEBI:77147)
	Hydroquinone (785, HMDB0002434, CHEBI:17594)
	Indole-3-lactic acid (92904, CHEBI:24813)
	Norathyriol (5281656, CHEBI:7622)
	Norathyriol (5281656, CHEBI:7622)
	Phloretin (4788, HMDB0003306, CHEBI:17276)
	Protopanaxadiol (9920281, CHEBI:76237)
PTGS2	(20S)-Protopanaxadiol (11213350, CHEBI:75950)
	(R)-3-(4-Hydroxyphenyl)lactate (9548632, CHEBI:10980)
	10-Keto-12Z-octadecenoic acid (24970825)
	2-(4-Hydroxyphenyl)propionic acid, (2S)- (6971268)
	2,3-Dihydroxypropyl (E)-3-(3,4-dihydroxyphenyl)prop-2-enoate (5315606)
	2-Hydroxy-3-(4-hydroxyphenyl)propanoic acid (9378, HMDB0000755, CHEBI:17385)
	2-Hydroxy-3-(5-hydroxy-1H-indol-3-yl)propanoic acid (192215)
	3-(3,4-Dihydroxyphenyl)-2-hydroxypropanoic acid (439435, HMDB0003503, CHEBI:17807)
	3-(3-Hydroxyphenyl)propanoic acid (91, HMDB0000375, CHEBI:1427)
	3-(4-Hydroxyphenyl)propionic acid (10394, HMDB0002199, CHEBI:32980)
	3,4-Dihydroxybenzoic acid (72, CHEBI:36062)
	3,4-Dihydroxyphenylacetic acid (547, HMDB0001336, CHEBI:41941)
	3-Hydroxy-4-methoxybenzenepropanoic acid (2752054, HMDB0131138)
	3-Hydroxybenzoic acid (7420, HMDB0002466, CHEBI:30764)
	3-Hydroxyphenethyl alcohol (83404)
	3-Phenylpropionic acid (107, CHEBI:28631)
	4-Hydroxy-(3',4'-dihydroxyphenyl)-valeric acid (52920332, HMDB0041679, CHEBI:137478)
	4-Hydroxybenzoic acid (135, HMDB0000500, CHEBI:30763)
	4-Hydroxyphenylacetic acid (127, HMDB0000020, CHEBI:18101)
	6,7,4'-Trihydroxyisoflavone (5284649, HMDB0031715, CHEBI:74957)
	6'-Hydroxy-O-desmethylangolensin (20601635, HMDB0041695, CHEBI:88662)
	Aglycone (CHEBI:166892)
	Apigenin (5280443, HMDB0002124, CHEBI:18388)
	Caffeic acid (689043, HMDB0001964, CHEBI:16433)
	Chrysin (5281607, HMDB0036619, CHEBI:75095)
	Daidzein (5281708, HMDB0003312, CHEBI:28197)
	Dihydrocaffeic acid (348154, HMDB0000423, CHEBI:48400)
	D-Lactic acid (61503, HMDB0001311, CHEBI:42111)
	Equol (91469, HMDB0002209, CHEBI:428126)
	Ethyl phenyllactate, (-)- (9877619, HMDB0032618)
	Folic acid (135398658, HMDB0000121, CHEBI:27470)
	Genistein (5280961, HMDB0003217, CHEBI:28088)
	Glycitein (5317750, HMDB0005781, CHEBI:542494)
	Isobutyric acid (6590, HMDB0001873, CHEBI:16135)
	Isoquercitrin (5280804, HMDB0037362, CHEBI:68352)
	Kaempferol (5280863, HMDB0005801, CHEBI:28499)
	Leucine (6106, HMDB0000687, CHEBI:15603)
	Naringenin chalcone (5280960, HMDB0029631, CHEBI:15413)
	Norathyriol (5281656, CHEBI:7622)
	Norathyriol (5281656, CHEBI:7622)
	Palmitic acid (985, HMDB0000220, CHEBI:15756)
	Phenolic acid (CHEBI:166890)
	Phenylacetic acid (999, HMDB0000209, CHEBI:30745)
	Phloretin (4788, HMDB0003306, CHEBI:17276)
	Pipecolic acid (849, HMDB0000070, CHEBI:17964)
	Ponciretin (25201019)
	Proline (145742, HMDB0000162, CHEBI:17203)
	Protopanaxadiol (9920281, CHEBI:76237)
	Quercimeritrin (5282160, CHEBI:28529)
	Quercitrin (5280459, HMDB0033751, CHEBI:17558)
	Quinic acid (6508, HMDB0003072, CHEBI:17521)
IGF1R	2,3-Bis(3,4-dihydroxybenzyl)butyrolactone (500189)
	2-Amino-1-methyl-6-phenylimidazo[4,5-b]pyridine (1530, CHEBI:76290)
	3-(3,4-Dihydroxyphenyl)-2-hydroxypropanoic acid (439435, HMDB0003503, CHEBI:17807)
	3-(3-Hydroxyphenyl)propanoic acid (91, HMDB0000375, CHEBI:1427)
	3-(4-Hydroxyphenyl)propionic acid (10394, HMDB0002199, CHEBI:32980)
	3,4-Dihydroxybenzoic acid (72, CHEBI:36062)
	3,4-Dihydroxyphenylacetic acid (547, HMDB0001336, CHEBI:41941)
	3-Hydroxy-4-methoxybenzenepropanoic acid (2752054, HMDB0131138)
	3-Hydroxybenzoic acid (7420, HMDB0002466, CHEBI:30764)
	4-Hydroxy-(3',4'-dihydroxyphenyl)-valeric acid (52920332, HMDB0041679, CHEBI:137478)
	4-Hydroxybenzoic acid (135, HMDB0000500, CHEBI:30763)
	6,7,4'-Trihydroxyisoflavone (5284649, HMDB0031715, CHEBI:74957)
	Apigenin (5280443, HMDB0002124, CHEBI:18388)
	Chrysin (5281607, HMDB0036619, CHEBI:75095)
	Dihydrocaffeic acid (348154, HMDB0000423, CHEBI:48400)
	Dihydrodaidzein (176907, HMDB0005760, CHEBI:75842)
	Equol (91469, HMDB0002209, CHEBI:428126)
	Ethyl phenyllactate, (-)- (9877619, HMDB0032618)
	Genistein (5280961, HMDB0003217, CHEBI:28088)
	Glutathione (124886, HMDB0000125, CHEBI:16856)
	Glycitein (5317750, HMDB0005781, CHEBI:542494)
	Hesperetin dihydrochalcone (147608, HMDB0128062)
	Isoquercitrin (5280804, HMDB0037362, CHEBI:68352)
	Kaempferol (5280863, HMDB0005801, CHEBI:28499)
	Naringenin (439246, HMDB0002670, CHEBI:50202)
	Naringenin chalcone (5280960, HMDB0029631, CHEBI:15413)
	Norathyriol (5281656, CHEBI:7622)
	Phenolic acid (CHEBI:166890)
	Quercetin (5280343, HMDB0005794, CHEBI:16243)
	Quercimeritrin (5282160, CHEBI:28529)
	Secoisolariciresinol (65373, HMDB0013692, CHEBI:65004)
RELA	2,3-Dihydroxypropyl (E)-3-(3,4-dihydroxyphenyl)prop-2-enoate (5315606)
	8-Prenylnaringenin (480764, CHEBI:50207)
	Caffeic acid (689043, HMDB0001964, CHEBI:16433)
	Equol (91469, HMDB0002209, CHEBI:428126)
	Naringenin chalcone (5280960, HMDB0029631, CHEBI:15413)
	Secoisolariciresinol (65373, HMDB0013692, CHEBI:65004)

## Sheet: final target, com,microbes
Final target Gene	Gene targeted Compounds and CID ID	Microbes	Compound Canonical smile ID
TP53	Bile acid (439520, CHEBI:22868)	Bacteroides distasonis, Clostridium scindens, Faecalibacterium prausnitzii, Haemophilus parainfluenzae.	CC(CCC(=O)O)C1CCC2C1([C@H](CC3C2[C@@H](C[C@H]4C3(CC[C@H](C4)O)C)O)O)C
CTNNB1	2-Hydroxy-3-(5-hydroxy-1H-indol-3-yl)propanoic acid (192215)	Clostridium sporogenes.	C1=CC2=C(C=C1O)C(=CN2)CC(C(=O)O)O
	3-Hydroxy-4-methoxybenzenepropanoic acid (2752054, HMDB0131138)	Clostridium orbiscindens, Eubacterium ramulus,	COC1=C(C=C(C=C1)CCC(=O)O)O
	Dihydrocaffeic acid (348154, HMDB0000423, CHEBI:48400)	Bifidobacterium, Bifidobacterium longum, Clostridium orbiscindens, Clostridium sporogenes, Eubacterium ramulus, Faecalibacterium prausnitzii, Lactobacillus mucosae, Lactobacillus zeae.	C1=CC(=C(C=C1CCC(=O)O)O)O
	Indole-3-lactic acid (92904, CHEBI:24813)	Clostridium sporogenes.	C1=CC=C2C(=C1)C(=CN2)CC(C(=O)O)O
MTOR	11-Methoxycurvularin (10381440)	Bacillus sp.	CC1CCCC(CC(=O)C2=C(CC(=O)O1)C=C(C=C2O)O)OC
	Dihydrodaidzein (176907, HMDB0005760, CHEBI:75842)	Blautia producta, Bacillus sp., Clostridium sp., Lactobacillus mucosae, Lactococcus sp.,	C1C(C(=O)C2=C(O1)C=C(C=C2)O)C3=CC=C(C=C3)O
	Glycocholic acid (10140, HMDB0000138, CHEBI:17687)	Bacteroides fragilis, Butyricicoccus pullicaecorum, Ruminococcus flavefaciens.	CC(CCC(=O)NCC(=O)O)C1CCC2C1(C(CC3C2C(CC4C3(CCC(C4)O)C)O)O)C
PIK3CA	11-Methoxycurvularin (10381440)	Bacillus sp.	CC1CCCC(CC(=O)C2=C(CC(=O)O1)C=C(C=C2O)O)OC
	3-Hydroxyphenethyl alcohol (83404)	Bifidobacterium.	C1=CC(=CC(=C1)O)CCO
	Caffeic acid (689043, HMDB0001964, CHEBI:16433)	Bifidobacterium, Bifidobacterium animalis.	C1=CC(=C(C=C1C=CC(=O)O)O)O
	Dihydrodaidzein (176907, HMDB0005760, CHEBI:75842)	Blautia producta, Bacillus sp., Clostridium sp., Lactobacillus mucosae, Lactococcus sp.,	C1C(C(=O)C2=C(O1)C=C(C=C2)O)C3=CC=C(C=C3)O
	Dihydroglycitein (101101166, CHEBI:174736)	Eubacterium limosum.	COC1=C(C=C2C(=C1)C(=O)C(CO2)C3=CC=C(C=C3)O)O
	Glycocholic acid (10140, HMDB0000138, CHEBI:17687)	Bacteroides fragilis, Butyricicoccus pullicaecorum, Ruminococcus flavefaciens.	CC(CCC(=O)NCC(=O)O)C1CCC2C1(C(CC3C2C(CC4C3(CCC(C4)O)C)O)O)C
	Isoquercitrin (5280804, HMDB0037362, CHEBI:68352)	Bacillus sp., Bacteroides sp., Eubacterium ramulus.	C1=CC(=C(C=C1C2=C(C(=O)C3=C(C=C(C=C3O2)O)O)OC4C(C(C(C(O4)CO)O)O)O)O)O
IL6	Acetate (175, CHEBI:30089)	Bacteroides thetaiotaomicron, Bacteroidetes, Bifidobacterium dentium, Bifidobacterium longum, Blautia faecis, Clostridium asparagiforme, Clostridium pasteurianum, Clostridium scindens, Clostridium sp. L2-50,Eubacterium limosum, Eubacterium ramulus, Eubacterium rectale, Lawsonibacter asaccharolyticus, Ruminococcus champanellensis, Succinivibrio dextrinosolvens,	CC(=O)[O-]
	Butyrate (104775, CHEBI:17968)	Butyricimonas synergistica, Butyricimonas virosa, Clostridium, Clostridium butyricum, Clostridium pasteurianum, Clostridium tyrobutyricum, Eubacterium hallii, Eubacterium limosum, Eubacterium ramulus, Eubacterium rectale, Faecalibacterium prausnitzii, Firmicutes , Fusobacteriia, Lawsonibacter asaccharolyticus, Prevotella copri, Roseburia inulinivorans.	CCCC(=O)[O-]
	Isoquercitrin (5280804, HMDB0037362, CHEBI:68352)	Bacillus sp., Bacteroides sp., Eubacterium ramulus.	C1=CC(=C(C=C1C2=C(C(=O)C3=C(C=C(C=C3O2)O)O)OC4C(C(C(C(O4)CO)O)O)O)O)O
	Propionate (104745, CHEBI:17272)	Bacteroides, Bacteroides thetaiotaomicron, Eubacterium limosum, Haemophilus parainfluenzae, Parasutterella excrementihominis, Phascolarctobacterium succinatutens, Propionibacterium avidum, Roseburia inulinivorans, Ruminococcus bromii, Veillonella, Veillonella ratti.	CCC(=O)[O-]
ERBB2	2,3-Dihydroxypropyl (E)-3-(3,4-dihydroxyphenyl)prop-2-enoate, 1-Caffeoylglycerol (5315606)	Bifidobacterium.	C1=CC(=C(C=C1C=CC(=O)OCC(CO)O)O)O
	2-Hydroxy-3-(5-hydroxy-1H-indol-3-yl)propanoic acid (192215)	Clostridium sporogenes.	C1=CC2=C(C=C1O)C(=CN2)CC(C(=O)O)O
	3-Hydroxy-4-methoxybenzenepropanoic acid (2752054, HMDB0131138)	Clostridium orbiscindens, Eubacterium ramulus.	COC1=C(C=C(C=C1)CCC(=O)O)O
	4-Hydroxy-(3',4'-dihydroxyphenyl)-valeric acid (52920332, HMDB0041679, CHEBI:137478)	Lactobacillus plantarum.	C1=CC(=C(C=C1CC(CCC(=O)O)O)O)O
	5-(3,4-Dihydroxyphenyl)-valerolactone (45093073)	Lactobacillus plantarum.	C1CC(OC(=O)C1)C2=CC(=C(C=C2)O)O
	Caffeic acid (689043, HMDB0001964, CHEBI:16433)	Bifidobacterium, Bifidobacterium animalis.	C1=CC(=C(C=C1C=CC(=O)O)O)O
	Ethyl phenyllactate, (-)- (9877619, HMDB0032618)	Bacteroides caccae, Clostridium sp.	CCOC(=O)C(CC1=CC=CC=C1)O
	Hydroquinone (785, HMDB0002434, CHEBI:17594)	Bacteroides, Bifidobacterium, Bifidobacterium longum, Eubacterium.	C1=CC(=CC=C1O)O
	Indole-3-lactic acid (92904, CHEBI:24813)	Clostridium sporogenes.	C1=CC=C2C(=C1)C(=CN2)CC(C(=O)O)O
PTGS2	(R)-3-(4-Hydroxyphenyl)lactate (9548632, CHEBI:10980)	Bacteroides caccae, Clostridium sp.	C1=CC(=CC=C1CC(C(=O)[O-])O)O
	2-(4-Hydroxyphenyl)propionic acid, (2S)- (6971268)	Eubacterium ramulus.	CC(C1=CC=C(C=C1)O)C(=O)O
	2,3-Dihydroxypropyl (E)-3-(3,4-dihydroxyphenyl)prop-2-enoate (5315606)	Bifidobacterium,	C1=CC(=C(C=C1C=CC(=O)OCC(CO)O)O)O
	2-Hydroxy-3-(4-hydroxyphenyl)propanoic acid (9378, HMDB0000755, CHEBI:17385)	Clostridium sporogenes.	C1=CC(=CC=C1CC(C(=O)O)O)O
	2-Hydroxy-3-(5-hydroxy-1H-indol-3-yl)propanoic acid (192215)	Clostridium sporogenes.	C1=CC2=C(C=C1O)C(=CN2)CC(C(=O)O)O
	3-(3,4-Dihydroxyphenyl)-2-hydroxypropanoic acid (439435, HMDB0003503, CHEBI:17807)	Clostridium sporogenes.	C1=CC(=C(C=C1CC(C(=O)O)O)O)O
	3-(3-Hydroxyphenyl)propanoic acid (91, HMDB0000375, CHEBI:1427)	Bifidobacterium.	C1=CC(=CC(=C1)O)CCC(=O)O
	3-(4-Hydroxyphenyl)propionic acid (10394, HMDB0002199, CHEBI:32980)	Clostridium orbiscindens, Eubacterium ramulus.	C1=CC(=CC=C1CCC(=O)O)O
	3,4-Dihydroxybenzoic acid (72, CHEBI:36062)	Bacteroides sp.	C1=CC(=C(C=C1C(=O)O)O)O
	3,4-Dihydroxyphenylacetic acid (547, HMDB0001336, CHEBI:41941)	Clostridium orbiscindens, Eubacterium ramulus,	C1=CC(=C(C=C1CC(=O)O)O)O
	3-Hydroxy-4-methoxybenzenepropanoic acid (2752054, HMDB0131138)	Clostridium orbiscindens, Eubacterium ramulus,	COC1=C(C=C(C=C1)CCC(=O)O)O
	3-Hydroxybenzoic acid (7420, HMDB0002466, CHEBI:30764)	Eubacterium.	C1=CC(=CC(=C1)O)C(=O)O
	3-Hydroxyphenethyl alcohol (83404)	Bifidobacterium.	C1=CC(=CC(=C1)O)CCO
	3-Phenylpropionic acid (107, CHEBI:28631)	Clostridium sporogenes	C1=CC=C(C=C1)CCC(=O)O
	4-Hydroxy-(3',4'-dihydroxyphenyl)-valeric acid (52920332, HMDB0041679, CHEBI:137478)	Lactobacillus plantarum.	C1=CC(=C(C=C1CC(CCC(=O)O)O)O)O
	4-Hydroxybenzoic acid (135, HMDB0000500, CHEBI:30763)	Eubacterium.	C1=CC(=CC=C1C(=O)O)O
	4-Hydroxyphenylacetic acid (127, HMDB0000020, CHEBI:18101)	Eubacterium ramulus,	C1=CC(=CC=C1CC(=O)O)O
	Caffeic acid (689043, HMDB0001964, CHEBI:16433)	Bifidobacterium, Bifidobacterium animalis.	C1=CC(=C(C=C1C=CC(=O)O)O)O
	Dihydrocaffeic acid (348154, HMDB0000423, CHEBI:48400)	Bifidobacterium, Bifidobacterium longum, Clostridium orbiscindens, Clostridium sporogenes, Eubacterium ramulus, Faecalibacterium prausnitzii, Lactobacillus mucosae, Lactobacillus zeae.	C1=CC(=C(C=C1CCC(=O)O)O)O
	D-Lactic acid (61503, HMDB0001311, CHEBI:42111)	Faecalibacterium prausnitzii	CC(C(=O)O)O
	Ethyl phenyllactate, (-)- (9877619, HMDB0032618)	Bacteroides caccae, Clostridium sp.	CCOC(=O)C(CC1=CC=CC=C1)O
	Isobutyric acid (6590, HMDB0001873, CHEBI:16135)	Butyricimonas synergistica, Butyricimonas virosa	CC(C)C(=O)O
	Isoquercitrin (5280804, HMDB0037362, CHEBI:68352)	Bacillus sp., Bacteroides sp., Eubacterium ramulus.	C1=CC(=C(C=C1C2=C(C(=O)C3=C(C=C(C=C3O2)O)O)OC4C(C(C(C(O4)CO)O)O)O)O)O
	Leucine (6106, HMDB0000687, CHEBI:15603)	Blautia, Faecalibacterium prausnitzii, Ruminococcus	CC(C)CC(C(=O)O)N
	Phenolic acid (338, CHEBI:166890)	Eubacterium ramulus.	C1=CC=C(C(=C1)C(=O)O)O
	Phenylacetic acid (999, HMDB0000209, CHEBI:30745)	Bifidobacterium.	C1=CC=C(C=C1)CC(=O)O
	Pipecolic acid (849, HMDB0000070, CHEBI:17964)	Lactobacillus casei.	C1CCNC(C1)C(=O)O
	Proline (145742, HMDB0000162, CHEBI:17203)	Blautia, Ruminococcus.	C1CC(NC1)C(=O)O
	Quinic acid (6508, HMDB0003072, CHEBI:17521)	Bifidobacterium animalis.	C1C(C(C(CC1(C(=O)O)O)O)O)O
IGF1R	2-Amino-1-methyl-6-phenylimidazo[4,5-b]pyridine (1530, CHEBI:76290)	Blautia obeum, Faecalibacterium prausnitzii, Lactobacillus reuteri.	CN1C2=C(N=CC(=C2)C3=CC=CC=C3)N=C1N
	3-(3,4-Dihydroxyphenyl)-2-hydroxypropanoic acid (439435, HMDB0003503, CHEBI:17807)	Clostridium sporogenes	C1=CC(=C(C=C1CC(C(=O)O)O)O)O
	3-(3-Hydroxyphenyl)propanoic acid (91, HMDB0000375, CHEBI:1427)	Bifidobacterium.	C1=CC(=CC(=C1)O)CCC(=O)O
	3-(4-Hydroxyphenyl)propionic acid (10394, HMDB0002199, CHEBI:32980)	Clostridium orbiscindens, Eubacterium ramulus.	C1=CC(=CC=C1CCC(=O)O)O
	3,4-Dihydroxybenzoic acid (72, CHEBI:36062)	Bacteroides sp.	C1=CC(=C(C=C1C(=O)O)O)O
	3,4-Dihydroxyphenylacetic acid (547, HMDB0001336, CHEBI:41941)	Clostridium orbiscindens, Eubacterium ramulus,	C1=CC(=C(C=C1CC(=O)O)O)O
	3-Hydroxy-4-methoxybenzenepropanoic acid (2752054, HMDB0131138)	Clostridium orbiscindens, Eubacterium ramulus,	COC1=C(C=C(C=C1)CCC(=O)O)O
	3-Hydroxybenzoic acid (7420, HMDB0002466, CHEBI:30764)	Eubacterium.	C1=CC(=CC(=C1)O)C(=O)O
	4-Hydroxy-(3',4'-dihydroxyphenyl)-valeric acid (52920332, HMDB0041679, CHEBI:137478)	Lactobacillus plantarum.	C1=CC(=C(C=C1CC(CCC(=O)O)O)O)O
	4-Hydroxybenzoic acid (135, HMDB0000500, CHEBI:30763)	Eubacterium.	C1=CC(=CC=C1C(=O)O)O
	Dihydrocaffeic acid (348154, HMDB0000423, CHEBI:48400)	Bifidobacterium, Bifidobacterium longum, Clostridium orbiscindens, Clostridium sporogenes, Eubacterium ramulus, Faecalibacterium prausnitzii, Lactobacillus mucosae, Lactobacillus zeae.	C1=CC(=C(C=C1CCC(=O)O)O)O
	Dihydrodaidzein (176907, HMDB0005760, CHEBI:75842)	Blautia producta, Bacillus sp., Clostridium sp., Lactobacillus mucosae, Lactococcus sp.,	C1C(C(=O)C2=C(O1)C=C(C=C2)O)C3=CC=C(C=C3)O
	Ethyl phenyllactate, (-)- (9877619, HMDB0032618)	Bacteroides caccae, Clostridium sp.	CCOC(=O)C(CC1=CC=CC=C1)O
	Glutathione (124886, HMDB0000125, CHEBI:16856)	Bacteroides thetaiotaomicron.	C(CC(=O)NC(CS)C(=O)NCC(=O)O)C(C(=O)O)N
	Isoquercitrin (5280804, HMDB0037362, CHEBI:68352)	Bacillus sp., Bacteroides sp., Eubacterium ramulus.	C1=CC(=C(C=C1C2=C(C(=O)C3=C(C=C(C=C3O2)O)O)OC4C(C(C(C(O4)CO)O)O)O)O)O
	Phenolic acid (338, CHEBI:166890)	Eubacterium ramulus.	C1=CC=C(C(=C1)C(=O)O)O
RELA	2,3-Dihydroxypropyl (E)-3-(3,4-dihydroxyphenyl)prop-2-enoate (5315606)	Bifidobacterium.	C1=CC(=C(C=C1C=CC(=O)OCC(CO)O)O)O
	Caffeic acid (689043, HMDB0001964, CHEBI:16433)	Bifidobacterium, Bifidobacterium animalis.	C1=CC(=C(C=C1C=CC(=O)O)O)O
